# Supplementary material for: Infrared multiple photon dissociation action spectroscopy of protonated glycine, histidine, lysine, and arginine complexed with 18-crown-6 ether
Source: Royal Society of Chemistry journal article supplement (doi:10.1039/c9cp02265a), 2019-01-01
Supplement: c9cp02265a1.pdf [file c9cp02265a1.pdf]

**Supplementary Material for**  
**Infrared Multiple Photon Dissociation Action Spectroscopy of Protonated Glycine,**  
**Histidine, Lysine, and Arginine Complexed with 18-Crown-6 Ether**

Christopher P. McNary,<sup>1</sup> Y.-w. Nei,<sup>2</sup> Philippe Maitre,<sup>3</sup> M. T. Rodgers,<sup>2\*</sup> P. B. Armentrout<sup>1\*</sup>

<sup>1</sup> *Department of Chemistry, University of Utah, 315 S. 1400 E. Room 2020 Salt Lake City, Utah  
84112 United States*

<sup>2</sup> *Department of Chemistry, Wayne State University, Detroit, Michigan 48202, United States*

<sup>3</sup> *Université Paris Sud, Laboratoire de Chimie Physique – UMR8000 CNRS, Faculté des Sciences  
– Bâtiment 350, 91405 Orsay Cedex, France*

**Table S1.** Relative energies at 0 K (Gibbs energies at 298 K) in kJ/mol of the (Gly)H<sup>+</sup>(18C6) complexes.<sup>a</sup>

| (Gly)H <sup>+</sup> (18C6)                      | B3LYP            | B3P86               | M06              | MP2(full)        |
|-------------------------------------------------|------------------|---------------------|------------------|------------------|
| H <sup>+</sup> G[N]-tt(-00/+00/-00/+00/-00/+00) | <b>0.0 (0.0)</b> | 0.01 ( <b>0.0</b> ) | <b>0.0 (0.0)</b> | <b>0.0 (0.0)</b> |
| H <sup>+</sup> G[N]-tt(+0+/-00/-00/+00/-0/-00)  | 0.8 (3.2)        | <b>0.0</b> (2.4)    | 6.4 (8.9)        | 1.5 (4.0)        |
| H <sup>+</sup> G[N]-tt(+00/-00/+00/-00/+00/-00) | 2.7 (3.2)        | 2.3 (2.8)           | 6.5 (7.0)        | 3.4 (3.9)        |
| H <sup>+</sup> G[N]-tt(+0+/-00/-00/+0+/-00/-00) | 6.9 (6.7)        | 6.7 (6.5)           | 12.6 (12.4)      | 8.6 (8.4)        |
| H <sup>+</sup> G[N]-tt(+0+/-00/-00/+0+/-00/-00) | 7.4 (8.0)        | 7.1 (7.8)           | 13.3 (13.9)      | 9.0 (9.6)        |
| H <sup>+</sup> G[N]-tt(++0/+00/--0/-00/+0+/-0+) | 13.3 (15.4)      | 11.7 (13.9)         | 18.7 (20.9)      | 13.7 (15.8)      |
| H <sup>+</sup> G[N]-tt(+00/-00/+00/--0/-00/+0+) | 8.5 (5.4)        | 8.4 (5.3)           | 16.2 (13.1)      | 13.7 (10.6)      |
| H <sup>+</sup> G[N]-tt(+00/-00/+00/--0/-00/+0+) | 8.9 (7.0)        | 8.9 (7.0)           | 16.7 (14.8)      | 14.3 (12.4)      |
| H <sup>+</sup> G[N]-tt(--0/-00/+00/-00/+0+/-00) | 11.7 (10.5)      | 11.9 (10.7)         | 20.3 (19.1)      | 16.1 (14.9)      |
| H <sup>+</sup> G[N]-tt(+00/-00/+00/--0/+00/+0+) | 11.0 (10.6)      | 11.1 (10.7)         | 20.4 (19.9)      | 16.5 (16.0)      |
| H <sup>+</sup> G[N]-tt(--0/-00/+00/-00/+0+/-00) | 12.1 (11.9)      | 12.3 (12.1)         | 20.7 (20.5)      | 16.5 (16.2)      |
| H <sup>+</sup> G[N]-tt(+00/--0/-00/-00/+00/-00) | 12.9 (11.6)      | 13.0 (11.7)         | 20.4 (19.1)      | 16.6 (15.3)      |
| H <sup>+</sup> G[N]-tt(+00/--0/--0/-00/+00/-00) | 13.0 (11.7)      | 13.1 (11.8)         | 20.4 (19.1)      | 16.6 (15.4)      |
| H <sup>+</sup> G[N]-tt(+0+/-00/+00/-00/+00/-00) | 17.3 (18.2)      | 16.1 (17.0)         | 22.0 (22.9)      | 16.8 (17.7)      |
| H <sup>+</sup> G[N]-tc(-00/+00/-00/+00/-00/+00) | 16.6 (14.2)      | 17.4 (15.0)         | 18.2 (15.8)      | 16.9 (14.5)      |
| H <sup>+</sup> G[N]-tt(+00/-00/+0+/-00/+00/-00) | 16.1 (18.0)      | 16.0 (17.9)         | 22.6 (24.5)      | 17.5 (19.4)      |
| H <sup>+</sup> G[N]-tt(+0+/-00/--0/-00/+00/-00) | 14.7 (14.1)      | 14.6 (14.0)         | 20.5 (19.9)      | 17.6 (17.0)      |
| H <sup>+</sup> G[N]-tt(+00/-00/+0+/-00/+00/-00) | 17.4 (19.3)      | 16.1 (18.0)         | 22.9 (24.8)      | 17.9 (19.8)      |
| H <sup>+</sup> G[N]-tc(+0+/-00/-00/+00/--0/-00) | 17.2 (17.7)      | 17.2 (17.7)         | 23.8 (24.3)      | 18.6 (19.1)      |
| H <sup>+</sup> G[N]-tt(-00/+00/--0/-0/-00/-00)  | 16.8 (16.0)      | 16.0 (15.3)         | 23.8 (23.0)      | 18.8 (18.0)      |
| H <sup>+</sup> G[N]-tt(--0/-00/+00/-00/+00/-00) | 19.1 (17.2)      | 18.4 (16.5)         | 23.9 (22.0)      | 19.4 (17.5)      |
| H <sup>+</sup> G[N]-tt(+00/-00/+00/-0/-00/-00)  | 21.2 (21.9)      | 20.2 (20.9)         | 22.1 (22.8)      | 20.8 (21.5)      |
| H <sup>+</sup> G[N]-tt(-00/+0+/-00/-00/-00/-00) | 18.6 (17.4)      | 18.4 (17.2)         | 25.7 (24.5)      | 21.2 (20.0)      |
| H <sup>+</sup> G[N]-tt(--0/-00/+00/-00/+0+/-00) | 17.0 (14.7)      | 17.5 (15.1)         | 25.4 (23.1)      | 21.7 (19.3)      |
| H <sup>+</sup> G[N]-tt(-00/+00/--0/--0/-00/-00) | 19.5 (16.0)      | 18.9 (15.4)         | 26.5 (23.1)      | 22.4 (18.9)      |
| H <sup>+</sup> G[N]-tt(-00/+0+/-0+/-00/--0/--0) | 15.8 (11.4)      | 16.4 (12.1)         | 27.1 (22.7)      | 22.5 (18.2)      |
| H <sup>+</sup> G[N]-tt(+00/+00/--0/-00/+0+/-0+) | 22.1 (21.3)      | 21.3 (20.5)         | 28.2 (27.4)      | 22.6 (21.8)      |
| H <sup>+</sup> G[N]-tt(-0/-00/+0+/-00/+00/--0)  | 22.7 (23.8)      | 21.8 (22.9)         | 29.5 (30.6)      | 24.1 (25.2)      |
| H <sup>+</sup> G[N]-tt(-0/-00/+0+/-00/--0/--0)  | 21.7 (21.0)      | 21.3 (20.6)         | 29.6 (28.9)      | 24.9 (24.2)      |
| H <sup>+</sup> G[N]-tt(-00/+00/--+/-00/-00/-00) | 21.6 (20.3)      | 21.0 (19.7)         | 29.8 (28.6)      | 25.1 (23.9)      |
| H <sup>+</sup> G[N]-tt(+0+/-00/--0/-00/-00/-00) | 26.4 (24.9)      | 25.6 (24.0)         | 30.4 (28.9)      | 27.1 (25.5)      |
| H <sup>+</sup> G[N]-tt(--0/-00/--0/-00/+00/-00) | 23.9 (21.2)      | 23.9 (21.2)         | 31.2 (28.5)      | 27.6 (24.9)      |
| H <sup>+</sup> G[N]-tt(-00/+0+/-0+/-00/+00/--0) | 25.6 (23.1)      | 25.1 (22.6)         | 32.3 (29.8)      | 28.3 (25.7)      |

<sup>a</sup> Gibbs energies in parentheses. **Ground conformations in bold.** All values calculated at the level of theory indicated using the 6-311+G(2d,2p) basis set with conformations, zero-point energies, and thermal energies calculated at B3LYP/6-311+G(d,p) level of theory.

**Table S2.** Relative energies at 0 K (Gibbs energies at 298 K) in kJ/mol of the (His)H<sup>+</sup>(18C6) complexes.<sup>a</sup>

| (His)H <sup>+</sup> (18C6)                                         | B3LYP            | B3P86            | M06              | MP2(full)          |
|--------------------------------------------------------------------|------------------|------------------|------------------|--------------------|
| H <sup>+</sup> H[N <sub>α</sub> ]-cggc(-00/+00/--0/-00/+00/--0)    | <b>0.0 (0.0)</b> | <b>0.0 (0.0)</b> | 0.4 (2.4)        | <b>0.0 (0.6)</b>   |
| H <sup>+</sup> H[N <sub>α</sub> ]-cggc(--0/-00/+0+/-00/-00/+00)    | 2.5 (4.3)        | 2.2 (3.9)        | 2.9 (6.6)        | 2.8 (5.1)          |
| H <sup>+</sup> H[N <sub>α</sub> ]-cggc(-00/+00/-00/+00/-00/+00)    | 4.1 (2.0)        | 4.0 (1.9)        | <b>0.0 (0.0)</b> | 1.5 ( <b>0.0</b> ) |
| H <sup>+</sup> H[N <sub>α</sub> ]-cggc(+00/-00/+00/--0/-00/+0+)    | 5.5 (2.9)        | 6.2 (3.7)        | 7.5 (7.0)        | 8.4 (6.4)          |
| H <sup>+</sup> H[N <sub>α</sub> ]-cggc(+0+/-00/-00/+0+/-00/-00)    | 5.5 (3.4)        | 5.4 (3.2)        | 4.3 (4.2)        | 6.6 (5.0)          |
| H <sup>+</sup> H[N <sub>α</sub> ]-cggc(+00/-00/+0+/-00/-00/+0+)    | 5.6 (4.6)        | 5.9 (4.9)        | 6.1 (7.2)        | 7.2 (6.8)          |
| H <sup>+</sup> H[N <sub>α</sub> ]-cggc(+00/-00/+00/--0/-00/+0+)    | 5.7 (1.9)        | 5.8 (2.0)        | 5.5 (3.7)        | 9.0 (5.8)          |
| H <sup>+</sup> H[N <sub>α</sub> ]-cggc(+00/-00/+00/-00/+00/-00)    | 7.0 (7.1)        | 6.7 (6.7)        | 7.5 (9.6)        | 8.8 (9.4)          |
| H <sup>+</sup> H[N <sub>α</sub> ]-cggc(-0/-00/-00/-00/-00/--0)     | 7.8 (9.1)        | 6.5 (7.8)        | 3.7 (7.0)        | 3.4 (5.3)          |
| H <sup>+</sup> H[N <sub>α</sub> ]-cggc(-00/+00/-00/+00/+00/--0)    | 8.1 (6.5)        | 8.5 (6.9)        | 6.7 (7.1)        | 7.6 (6.5)          |
| H <sup>+</sup> H[N <sub>α</sub> ]-cggc(-00/+00/--0/-00/+00/--0)    | 8.6 (6.9)        | 8.1 (6.4)        | 9.4 (9.7)        | 10.6 (9.5)         |
| H <sup>+</sup> H[N <sub>α</sub> ]-cggc(+00/+00/+00/+00/-00/+00)    | 8.8 (8.5)        | 8.4 (8.1)        | 5.5 (7.2)        | 6.7 (7.0)          |
| H <sup>+</sup> H[N <sub>α</sub> ]-cggc(++0/+00/-00/+00/-00/+0+)    | 9.7 (9.6)        | 8.5 (8.4)        | 4.9 (6.9)        | 6.9 (7.4)          |
| H <sup>+</sup> H[N <sub>α</sub> ]-cggc(+00/--0/-00/+00/-00/+0+)    | 9.9 (7.2)        | 10.8 (8.1)       | 11.1 (10.4)      | 13.9 (11.7)        |
| H <sup>+</sup> H[N <sub>α</sub> ]-cggc(++0/+00/-+0/-00/+0+/-+0+)   | 10.3 (11.0)      | 9.1 (9.8)        | 10.8 (13.5)      | 9.7 (11.0)         |
| H <sup>+</sup> H[N <sub>α</sub> ]-cggc(--0/--0/-00/+00/-00/+00)    | 10.9 (8.0)       | 11.4 (8.5)       | 12.7 (11.8)      | 13.1 (10.8)        |
| H <sup>+</sup> H[N <sub>α</sub> ]-cggc(--0/-00/-00/--0/-0/--0)     | 11.4 (11.0)      | 10.7 (10.3)      | 12.9 (14.5)      | 11.8 (12.0)        |
| H <sup>+</sup> H[N <sub>α</sub> ]-cggc(-00/+00/--0/--0/-00/--0)    | 11.4 (9.9)       | 11.6 (10.1)      | 12.4 (12.9)      | 12.2 (11.3)        |
| H <sup>+</sup> H[N <sub>α</sub> ]-cggc(++0/+0+/-+00/-0/-00/+0+)    | 11.8 (9.9)       | 11.5 (9.6)       | 13.0 (13.2)      | 14.9 (13.6)        |
| H <sup>+</sup> H[N <sub>α</sub> ]-cggc(++0/+0+/-+00/-0/-00/+0+)    | 11.9 (10.6)      | 11.7 (10.4)      | 12.7 (13.5)      | 14.9 (14.2)        |
| H <sup>+</sup> H[N <sub>α</sub> ]-cggc(++0/+0+/-+00/-0/-00/+0+)    | 11.9 (10.7)      | 11.7 (10.4)      | 12.7 (13.5)      | 14.8 (14.2)        |
| H <sup>+</sup> H[N <sub>α</sub> ]-cggc(++0/+00/--0/-00/+00/--+)    | 12.6 (12.2)      | 11.9 (11.5)      | 12.2 (13.8)      | 11.8 (12.0)        |
| H <sup>+</sup> H[N <sub>α</sub> ]-cggc(+00/-+0/-00/--0/-00/-0+)    | 12.8 (8.5)       | 13.5 (9.2)       | 14.8 (12.5)      | 15.4 (11.6)        |
| H <sup>+</sup> H[N <sub>α</sub> ]-cggc(--0/-00/+0+/-+00/-0/--0)    | 13.1 (14.2)      | 11.9 (13.0)      | 13.5 (16.7)      | 13.1 (14.8)        |
| H <sup>+</sup> H[N <sub>α</sub> ]-cggc(++0/0+0/+00/-00/+0+/-+00)   | 13.1 (12.7)      | 12.6 (12.2)      | 14.6 (16.2)      | 15.1 (15.2)        |
| H <sup>+</sup> H[N <sub>α</sub> ]-cggc(+0+/-+00/-00/+00/-00/+00)   | 13.2 (7.1)       | 13.7 (7.7)       | 13.9 (9.8)       | 15.1 (9.6)         |
| H <sup>+</sup> H[N <sub>α</sub> ]-cggc(+0+/-+00/-00/+0+/-+00/+00)  | 13.2 (11.7)      | 12.2 (10.7)      | 13.8 (14.3)      | 13.9 (12.9)        |
| H <sup>+</sup> H[N <sub>α</sub> ]-cggc(+0+/-+00/-0+/-+00/-00/+0+)  | 13.5 (11.5)      | 13.8 (11.9)      | 16.3 (16.4)      | 16.5 (15.1)        |
| H <sup>+</sup> H[N <sub>α</sub> ]-cggc(-0/--0/-00/+00/-00/+00)     | 13.6 (12.7)      | 12.7 (11.8)      | 9.5 (10.7)       | 12.1 (11.8)        |
| H <sup>+</sup> H[N <sub>α</sub> ]-cggc(++0/+00/--0/--0/-00/+0+)    | 14.4 (12.1)      | 14.0 (11.7)      | 16.3 (16.0)      | 16.7 (14.9)        |
| H <sup>+</sup> H[N <sub>α</sub> ]-cggc(+0+/-+00/+00/-0/-00/+00)    | 14.9 (13.1)      | 14.8 (13.1)      | 14.9 (15.1)      | 14.9 (13.7)        |
| H <sup>+</sup> H[N <sub>α</sub> ]-cggc(-0/-00/+0+/-+00/-0/--0)     | 15.4 (15.6)      | 14.6 (14.8)      | 15.5 (17.7)      | 15.4 (16.2)        |
| H <sup>+</sup> H[N <sub>α</sub> ]-cggc(-0/-00/+0+/-+00/+00/--0)    | 15.5 (15.4)      | 14.6 (14.5)      | 14.3 (16.2)      | 13.5 (14.0)        |
| H <sup>+</sup> H[N <sub>π</sub> ]-tgg.g.(+00/-00/+0+/-+00/-00/+0+) | 18.6 (11.0)      | 26.0 (18.5)      | 27.5 (22.0)      | 36.2 (29.1)        |
| H <sup>+</sup> H[N <sub>π</sub> ]-tgtg(+00/-00/+0+/-+00/-00/+0+)   | 19.9 (9.4)       | 28.1 (17.6)      | 36.7 (28.2)      | 48.3 (38.3)        |
| H <sup>+</sup> H[N <sub>π</sub> ]-tgg.g.(-00/-00/-00/-00/+00/--0)  | 23.2 (15.3)      | 29.8 (21.8)      | 25.2 (19.2)      | 34.7 (27.2)        |
| H <sup>+</sup> H[N <sub>π</sub> ]-tgtg(+00/-00/+00/--0/-00/+0+)    | 23.5 (14.2)      | 31.2 (21.9)      | 38.6 (31.3)      | 50.1 (41.4)        |
| H <sup>+</sup> H[N <sub>π</sub> ]-tgg.g(+00/-00/+0+/-+00/-00/+0+)  | 26.7 (27.0)      | 32.3 (32.6)      | 30.0 (32.3)      | 33.1 (33.9)        |
| H <sup>+</sup> H[N <sub>π</sub> ]-tgg.g.(-00/+00/--0/-00/+00/--0)  | 25.5 (21.4)      | 32.8 (28.7)      | 29.0 (26.9)      | 35.3 (31.8)        |

<sup>a</sup> Gibbs energies in parentheses. **Ground conformations in bold.** All values calculated at the level of theory indicated using the 6-311+G(2d,2p) basis set with conformations, zero-point energies, and thermal energies calculated at B3LYP/6-311+G(d,p) level of theory.

**Table S3.** Relative energies at 0 K (Gibbs energies at 298 K) in kJ/mol of the (Lys)H<sup>+</sup>(18C6) complexes.<sup>a</sup>

| (Lys)H <sup>+</sup> (18C6)                                           | B3LYP              | B3P86                     | M06                       | MP2(full)                 |
|----------------------------------------------------------------------|--------------------|---------------------------|---------------------------|---------------------------|
| H <sup>+</sup> K[N <sub>e</sub> ]-ctg.gtt(-00/+00/-00/+00/-00/+00)   | <b>0.0</b> (3.7)   | <b>0.0</b> ( <b>0.0</b> ) | 1.1 (0.7)                 | 0.6 (0.2)                 |
| H <sup>+</sup> K[N <sub>e</sub> ]-tg.tttt(-00/+00/-00/+00/-00/+00)   | 1.3 ( <b>0.0</b> ) | 6.4 (1.4)                 | 15.7 (10.3)               | 18.1 (12.7)               |
| H <sup>+</sup> K[N <sub>e</sub> ]-ctgttg(+00/-00/+00/--0/+00/+0+)    | 2.8 (8.1)          | 3.3 (4.9)                 | 11.6 (12.8)               | 5.2 (6.4)                 |
| H <sup>+</sup> K[N <sub>e</sub> ]-ctg.ggt(-00/+00/--0/-00/+00/--0)   | 3.2 (11.2)         | 3.1 (7.4)                 | 14.7 (18.5)               | 8.8 (12.7)                |
| H <sup>+</sup> K[N <sub>e</sub> ]-cgg.gtt(+00/-00/+0+/-00/-00/+0+)   | 3.4 (8.9)          | 3.3 (5.1)                 | 10.3 (11.7)               | 4.6 (6.1)                 |
| H <sup>+</sup> K[N <sub>e</sub> ]-ctgttg(+00/-00/+0+/-00/-00/+0+)    | 4.3 (8.5)          | 5.6 (6.1)                 | 15.6 (15.7)               | 12.3 (12.4)               |
| H <sup>+</sup> K[N <sub>e</sub> ]-cggg.tt(-00/+00/--0/-00/+00/--0)   | 4.5 (10.1)         | 5.5 (7.3)                 | 17.9 (19.4)               | 11.7 (13.1)               |
| H <sup>+</sup> K[N <sub>e</sub> ]-ctgg.g.t(+0+/-00/-00/+0+/-00/-00)  | 5.5 (11.8)         | 6.7 (9.4)                 | 16.8 (19.0)               | 13.4 (15.7)               |
| H <sup>+</sup> K[N <sub>e</sub> ]-ttttt(-00/+00/-00/+00/-00/+00)     | 5.7 (0.6)          | 10.5 (1.7)                | 20.2 (10.9)               | 23.6 (14.3)               |
| H <sup>+</sup> K[N <sub>e</sub> ]-tggggt(-00/+00/-00/+00/-00/+00)    | 6.1 (11.2)         | 9.3 (10.7)                | 7.5 (8.4)                 | 3.8 (4.7)                 |
| H <sup>+</sup> K[N <sub>e</sub> ]-ctg.ggt(+00/-00/+00/-00/+00/-00)   | 6.2 (13.8)         | 6.3 (10.1)                | 12.2 (15.6)               | 7.5 (10.9)                |
| H <sup>+</sup> K[N <sub>e</sub> ]-tg.tttg(+0+/-00/--0/-00/+00/-00)   | 6.4 (9.1)          | 10.3 (9.3)                | 17.2 (15.9)               | 15.9 (14.5)               |
| H <sup>+</sup> K[N <sub>e</sub> ]-cg.g.gtt(-00/+0+/-00/-00/+00/--0)  | 7.1 (11.8)         | 8.4 (9.3)                 | 15.7 (16.2)               | 11.5 (12.0)               |
| H <sup>+</sup> K[N <sub>e</sub> ]-cgggtg(+00/-00/+0+/-00/--0/-00)    | 7.5 (11.6)         | 8.1 (8.5)                 | <b>0.0</b> ( <b>0.0</b> ) | <b>0.0</b> ( <b>0.0</b> ) |
| H <sup>+</sup> K[N <sub>e</sub> ]-ttttgt(-00/+00/-00/+00/-00/+00)    | 7.6 (5.1)          | 12.6 (6.3)                | 19.2 (12.5)               | 22.7 (16.0)               |
| H <sup>+</sup> K[N <sub>e</sub> ]-tg.g.ttg(+00/-00/+00/--0/-00/+00)  | 7.7 (10.3)         | 11.3 (10.2)               | 15.4 (13.9)               | 12.3 (10.8)               |
| H <sup>+</sup> K[N <sub>e</sub> ]-ctg.tg.g(-00/+0+/-00/-00/+0+/-00)  | 7.8 (14.7)         | 7.9 (11.1)                | 11.1 (13.9)               | 7.2 (10.0)                |
| H <sup>+</sup> K[N <sub>e</sub> ]-cggg.tt(+0+/-00/-00/+00/--0/-00)   | 7.9 (13.6)         | 9.2 (11.1)                | 17.6 (19.2)               | 12.5 (14.0)               |
| H <sup>+</sup> K[N <sub>e</sub> ]-ttg.ttg(+00/-00/+00/--0/-00/+0+)   | 8.5 (11.7)         | 12.9 (12.4)               | 17.9 (17.0)               | 14.2 (13.3)               |
| H <sup>+</sup> K[N <sub>e</sub> ]-cggg.tt(+00/-00/+0+/-00/-00/+0+)   | 9.0 (13.4)         | 10.4 (11.1)               | 19.6 (19.9)               | 13.7 (14.0)               |
| H <sup>+</sup> K[N <sub>e</sub> ]-cgg.ttg(+00/-00/+00/--0/-00/+0+)   | 9.1 (13.9)         | 9.6 (10.6)                | 9.6 (10.3)                | 6.1 (6.8)                 |
| H <sup>+</sup> K[N <sub>e</sub> ]-ctgttg(-00/-00/+0+/-00/-00/+00)    | 9.7 (16.3)         | 9.7 (12.6)                | 13.0 (15.5)               | 9.6 (12.1)                |
| H <sup>+</sup> K[N <sub>e</sub> ]-cg.g.g.tg(--0/-00/-00/--0/-0/--0)  | 10.0 (18.2)        | 9.8 (14.3)                | 17.2 (21.2)               | 10.2 (14.2)               |
| H <sup>+</sup> K[N <sub>e</sub> ]-tg.g.tgg(+0+/-00/-00/+00/--0/-00)  | 10.1 (13.0)        | 12.8 (12.1)               | 15.0 (13.8)               | 12.1 (10.8)               |
| H <sup>+</sup> K[N <sub>e</sub> ]-cg.gttg(--0/-00/+0+/-00/-00/+00)   | 10.2 (16.1)        | 10.2 (12.4)               | 8.8 (10.6)                | 5.9 (7.7)                 |
| H <sup>+</sup> K[N <sub>e</sub> ]-cg.gg.tt(+00/--0/-00/+00/-00/+0+)  | 10.6 (13.8)        | 10.2 (12.4)               | 19.2 (18.4)               | 16.3 (15.5)               |
| H <sup>+</sup> K[N <sub>e</sub> ]-cgggtg(-0/-00/-00/-00/+00/--0)     | 10.6 (19.1)        | 11.3 (11.0)               | 15.8 (20.2)               | 9.8 (14.2)                |
| H <sup>+</sup> K[N <sub>e</sub> ]-tg.g.ttg(--00/+00/--0/-00/+00/--0) | 10.6 (17.6)        | 13.6 (16.9)               | 10.4 (13.3)               | 6.5 (9.3)                 |
| H <sup>+</sup> K[N <sub>e</sub> ]-tg.g.gtt(+0+/-00/-00/+0+/-00/-00)  | 10.7 (13.8)        | 14.3 (13.6)               | 21.0 (19.9)               | 14.8 (13.7)               |
| H <sup>+</sup> K[N <sub>e</sub> ]-cgg.gtt(+0+/-00/--0/-00/+00/-00)   | 11.3 (16.2)        | 12.1 (13.3)               | 22.4 (23.2)               | 16.1 (16.9)               |
| H <sup>+</sup> K[N <sub>e</sub> ]-ctg.ttg(-00/+00/--0/-00/+0+/-00)   | 12.0 (16.6)        | 12.8 (13.7)               | 18.7 (19.2)               | 17.5 (18.0)               |
| H <sup>+</sup> K[N <sub>e</sub> ]-cg.tgt(-00/+00/-00/+00/-00/+00)    | 12.5 (12.1)        | 13.8 (9.8)                | 23.4 (19.0)               | 27.0 (22.5)               |
| H <sup>+</sup> K[N <sub>e</sub> ]-cg.tttt(-00/+00/-00/+00/-00/+00)   | 13.4 (13.4)        | 15.5 (11.8)               | 28.6 (24.5)               | 32.0 (27.9)               |
| H <sup>+</sup> K[N <sub>e</sub> ]-cgggtg(-00/+0+/-00/-00/+0+/-00)    | 13.5 (21.1)        | 12.9 (16.8)               | 19.2 (22.7)               | 12.8 (16.3)               |
| H <sup>+</sup> K[N <sub>e</sub> ]-ttgg.g.t(+00/-00/+00/-00/+00/-00)  | 13.8 (26.7)        | 14.7 (23.9)               | 7.5 (16.3)                | 2.7 (11.5)                |
| H <sup>+</sup> K[N <sub>e</sub> ]-tggg.tt(-00/+00/-00/+00/-00/+00)   | 18.4 (30.3)        | 19.8 (28.0)               | 11.9 (19.7)               | 10.0 (17.7)               |
| H <sup>+</sup> K[N <sub>e</sub> ]-tg.ggtt(-00/+00/-00/+00/-00/+00)   | 18.6 (19.0)        | 23.9 (20.7)               | 27.8 (24.1)               | 28.3 (24.6)               |
| H <sup>+</sup> K[N <sub>e</sub> ]-tg.tgt(-00/+0+/-00/+0+/-00/--0)    | 23.2 (20.8)        | 28.5 (22.3)               | 45.1 (38.4)               | 44.1 (37.5)               |
| H <sup>+</sup> K[N <sub>α</sub> ]-cg.ggg.g(-00/+0+/-00/-00/+00/--0)  | 17.6 (26.4)        | 16.1 (21.2)               | 17.9 (22.6)               | 10.0 (14.7)               |
| H <sup>+</sup> K[N <sub>α</sub> ]-tg.gg.tg(-00/+00/-00/+00/-00/+00)  | 18.4 (29.5)        | 15.2 (22.7)               | 12.9 (20.0)               | 8.8 (15.9)                |
| H <sup>+</sup> K[N <sub>α</sub> ]-cg.ggg.g(+0+/-00/-00/+00/-00/+00)  | 20.5 (32.5)        | 18.0 (26.3)               | 18.8 (26.7)               | 10.6 (18.5)               |

<sup>a</sup> Gibbs energies in parentheses. **Ground conformations in bold**. All values calculated at the level of theory indicated using the 6-311+G(2d,2p) basis set with conformations, zero-point energies, and thermal energies calculated at B3LYP/6-311+G(d,p) level of theory.

**Table S4.** Relative energies at 0 K (Gibbs energies at 298 K) in kJ/mol of the (Arg)H<sup>+</sup>(18C6) complexes.<sup>a</sup>

| (Arg)H <sup>+</sup> (18C6)                                           | B3LYP              | B3P86              | M06                | MP2(full)        |
|----------------------------------------------------------------------|--------------------|--------------------|--------------------|------------------|
| H <sup>+</sup> R[N <sub>o</sub> ]-tcg.gg.t(-00/+0+/-00/-00/+0+/-00)  | <b>0.0</b> (12.8)  | <b>0.0</b> (11.2)  | 1.4 (1.4)          | <b>0.0</b> (1.9) |
| H <sup>+</sup> R[N <sub>o</sub> ]-cggg.tg(+00/-00/+0+/-00/-00/+0+)   | 1.1 ( <b>0.0</b> ) | 2.6 ( <b>0.0</b> ) | 15.3 (1.5)         | 24.4 (12.4)      |
| H <sup>+</sup> R[N <sub>o</sub> ]-cgggtg(-00/+00/+0+/-00/-00/+00)    | 2.7 (5.9)          | 3.2 (4.8)          | 9.6 ( <b>0.0</b> ) | 17.1 (9.4)       |
| H <sup>+</sup> R[N <sub>o</sub> ]-tg.g.g.gg(+00/-00/+0+/-00/-00/+0+) | 3.4 (6.2)          | 7.1 (8.4)          | 18.2 (8.2)         | 24.9 (16.8)      |
| H <sup>+</sup> R[N <sub>o</sub> ]-ctg.ggg(-00/+00/-0/-00/+00/-0)     | 4.7 (7.3)          | 5.8 (6.8)          | 18.4 (8.2)         | 28.5 (20.2)      |
| H <sup>+</sup> R[N <sub>o</sub> ]-cg.g.gtg(+00/-0/-00/+00/-00/+0+)   | 5.1 (10.3)         | 6.5 (9.2)          | 17.3 (8.7)         | 24.4 (17.7)      |
| H <sup>+</sup> R[N <sub>o</sub> ]-cgggtg(+00/-00/+00/-00/+0+/-0+)    | 10.3 (14.4)        | 14.0 (16.5)        | 22.8 (14.1)        | 28.7 (21.8)      |
| H <sup>+</sup> R[N <sub>o</sub> ]-tgtg.g.g(-00/+00/-0/-00/+00/-0)    | 7.0 (5.8)          | 9.8 (7.0)          | 23.0 (9.0)         | 29.6 (17.4)      |
| H <sup>+</sup> R[N <sub>o</sub> ]-cg.g.gtg(-0/-00/+00/+00/-00/-0)    | 6.9 (8.2)          | 7.6 (7.4)          | 15.8 (4.3)         | 25.0 (15.4)      |
| H <sup>+</sup> R[N <sub>o</sub> ]-cggg.tg(+00/-00/+00/-00/+0+/-0+)   | 6.9 (8.2)          | 7.6 (7.4)          | 15.8 (4.3)         | 25.0 (15.4)      |
| H <sup>+</sup> R[N <sub>o</sub> ]-cg.g.gtg(-00/+0+/-0+/-00/-00/+00)  | 7.4 (8.4)          | 8.3 (7.7)          | 15.2 (3.4)         | 24.2 (14.2)      |
| H <sup>+</sup> R[N <sub>o</sub> ]-cgggtg(-00/+0+/-00/-00/+00/-0)     | 6.4 (9.4)          | 7.2 (8.7)          | 16.3 (6.5)         | 23.9 (16.0)      |
| H <sup>+</sup> R[N <sub>o</sub> ]-tcg.g.gg(-0/-00/-00/+00/-00/+00)   | 9.6 (24.2)         | 8.1 (21.1)         | <b>0.0</b> (1.8)   | 0.8 (4.4)        |
| H <sup>+</sup> R[N <sub>o</sub> ]-tg.g.g.g(-00/+00/-0/-00/+00/-0)    | 7.7 (7.9)          | 9.9 (8.5)          | 20.1 (7.5)         | 25.9 (15.2)      |
| H <sup>+</sup> R[N <sub>o</sub> ]-tcgg.gt(-0/-00/+0+/-0+/-00/-0)     | 10.0 (21.0)        | 10.7 (20.1)        | 18.6 (16.9)        | 15.6 (15.7)      |
| H <sup>+</sup> R[N <sub>o</sub> ]-tcg.g.gg(-0/-00/+00/-0+/-00/-0)    | 9.6 (23.3)         | 9.4 (21.6)         | 5.0 (6.0)          | 5.7 (8.4)        |
| H <sup>+</sup> R[N <sub>o</sub> ]-cg.g.gtg(-00/+00/-00/+00/-00/-0)   | 8.0 (8.6)          | 9.2 (8.2)          | 19.5 (7.4)         | 28.8 (18.5)      |
| H <sup>+</sup> R[N <sub>o</sub> ]-tg.g.g.gg(-00/+0+/-0+/-00/-00/+00) | 8.5 (8.6)          | 12.2 (10.8)        | 21.0 (8.3)         | 26.8 (16.0)      |
| H <sup>+</sup> R[N <sub>o</sub> ]-ctg.ggg(+00/-00/+0+/-00/-00/+0+)   | 8.1 (8.8)          | 9.1 (8.2)          | 23.8 (11.7)        | 33.5 (23.3)      |
| H <sup>+</sup> R[N <sub>o</sub> ]-ttg.gg.t(-00/+0+/-00/-00/-0)       | 12.4 (21.6)        | 12.9 (20.5)        | 19.5 (15.9)        | 19.2 (17.4)      |
| H <sup>+</sup> R[N <sub>o</sub> ]-tcgg.gt(-0/-0+/-00/-00/+0+/-00)    | 11.9 (25.0)        | 10.5 (22.0)        | 5.4 (5.7)          | 5.0 (7.1)        |
| H <sup>+</sup> R[N <sub>o</sub> ]-tcgg.gt(-00/-0/-00/+0+/-00/-0)     | 12.0 (25.4)        | 10.3 (22.2)        | 3.6 (4.3)          | 4.8 (7.4)        |
| H <sup>+</sup> R[N <sub>o</sub> ]-tg.tg.tg(-0/-00/+00/-00/+00/-0)    | 11.1 (10.7)        | 13.0 (11.1)        | 19.6 (6.4)         | 24.9 13.5        |
| H <sup>+</sup> R[N <sub>o</sub> ]-tg.g.g.tg(+00/-00/+00/-0/-00/+0+)  | 10.5 (13.2)        | 13.1 (14.3)        | 12.1 (2.0)         | 19.2 (11.0)      |
| H <sup>+</sup> R[N <sub>o</sub> ]-ctg.ggt(+00/-00/+0+/-00/-00/+0+)   | 10.3 (8.7)         | 12.1 (9.0)         | 26.6 (12.3)        | 37.0 (24.4)      |
| H <sup>+</sup> R[N <sub>o</sub> ]-tcgg.gt(-00/+0+/-00/+0+/-00/-0)    | 12.4 (25.7)        | 10.2 (21.9)        | 4.9 (5.4)          | 4.0 (6.3)        |
| H <sup>+</sup> R[N <sub>o</sub> ]-tg.g.g.gg(+00/-0/-0/-00/+00/-0)    | 11.0 (13.1)        | 14.6 (15.1)        | 21.3 (10.6)        | 28.7 (19.8)      |
| H <sup>+</sup> R[N <sub>o</sub> ]-tg.g.gg.t(+00/-00/+0+/-00/-00/+0+) | 10.9 (14.0)        | 13.7 (15.3)        | 25.4 (15.8)        | 30.9 (23.1)      |
| H <sup>+</sup> R[N <sub>o</sub> ]-tgtg.gt(-0/-00/+00/-00/+00/-0)     | 10.6 (6.8)         | 14.4 (9.0)         | 28.1 (11.6)        | 33.8 (19.1)      |
| H <sup>+</sup> R[N <sub>o</sub> ]-ctgg.tg(-00/+00/-0/-00/+00/-0)     | 10.8 (12.3)        | 12.1 (12.1)        | 24.3 (13.1)        | 33.6 (24.3)      |
| H <sup>+</sup> R[N <sub>o</sub> ]-cgggtg(+00/-0/-0/-00/+00/-0)       | 10.8 (10.9)        | 12.5 (11.0)        | 22.0 (9.4)         | 30.1 (19.3)      |
| H <sup>+</sup> R[N <sub>o</sub> ]-tgggtg(-00/+00/-00/+0+/-0+/-00)    | 12.0 (17.2)        | 13.7 (17.3)        | 10.6 (3.0)         | 16.6 (10.8)      |
| H <sup>+</sup> R[N <sub>o</sub> ]-tcgg.gt(+0+/-0+/-00/-00/+0+/-0+)   | 13.4 (25.9)        | 12.3 (23.3)        | 7.6 (7.4)          | 8.8 (10.3)       |
| H <sup>+</sup> R[N <sub>o</sub> ]-tg.tggg(+0+/-00/-00/+00/-00/+00)   | 11.8 (12.8)        | 13.3 (12.7)        | 20.1 (8.2)         | 27.0 (17.1)      |
| H <sup>+</sup> R[N <sub>o</sub> ]-tcgg.gt(+0+/-00/-00/+00/+0+/-0+)   | 14.3 (25.8)        | 12.6 (22.5)        | 3.9 (2.7)          | 5.0 (5.6)        |
| H <sup>+</sup> R[N <sub>o</sub> ]-tcgg.gt(-0/-00/+00/-0/-00/+00)     | 14.0 (25.8)        | 13.6 (23.8)        | 8.9 (7.9)          | 7.9 (8.7)        |
| H <sup>+</sup> R[N <sub>o</sub> ]-tg.tggg(-0/-00/+00/-00/+00/-0)     | 11.9 (10.4)        | 14.5 (11.4)        | 25.0 (10.7)        | 33.4 (21.0)      |
| H <sup>+</sup> R[N <sub>o</sub> ]-tgtg.g.g(+00/-00/+00/-00/+0+/-0+)  | 11.9 (10.4)        | 14.5 (14.4)        | 25.0 (10.8)        | 33.5 (21.0)      |
| H <sup>+</sup> R[N <sub>o</sub> ]-cgggtg(+00/-00/+0+/-0+/-00/-00)    | 11.7 (17.0)        | 11.2 (15.0)        | 14.9 (7.5)         | 21.3 (15.8)      |
| H <sup>+</sup> R[N <sub>o</sub> ]-tgtg.tg(+00/-00/+00/-00/+0+/-0+)   | 12.5 (13.4)        | 14.8 (14.2)        | 22.3 (10.5)        | 29.9 (19.9)      |
| H <sup>+</sup> R[N <sub>o</sub> ]-tgtg.tg(+00/-00/+00/-00/+00/+0+)   | 12.7 (12.8)        | 15.1 (13.7)        | 23.3 (10.7)        | 31.8 (21.0)      |
| H <sup>+</sup> R[N <sub>o</sub> ]-tg.tgg.t(-00/+0+/-0+/-00/-00/+00)  | 12.0 (16.4)        | 15.5 (18.4)        | 25.0 (16.7)        | 29.5 (23.0)      |
| H <sup>+</sup> R[N <sub>o</sub> ]-tg.tg.tg(+00/-00/+00/-00/+0+/-0+)  | 13.0 (14.7)        | 14.6 (14.8)        | 21.6 (10.6)        | 27.5 (18.3)      |

|                                                                      |             |             |             |                    |
|----------------------------------------------------------------------|-------------|-------------|-------------|--------------------|
| H <sup>+</sup> R[N <sub>ω</sub> ]-cgggtg(+00/-00/+0+/-0+/-00/--+)    | 11.5 (11.7) | 12.7 (11.4) | 19.4 (6.8)  | 27.7 (17.0)        |
| H <sup>+</sup> R[N <sub>ω</sub> ]-tg.tgtg(+00/-00/+00/-00/+0+/-0+)   | 13.0 (14.4) | 15.4 (15.3) | 22.4 (11.1) | 31.3 (21.8)        |
| H <sup>+</sup> R[N <sub>ω</sub> ]-tgtg.tg(--0/-00/+00/-00/+00/--0)   | 13.0 (14.4) | 15.4 (15.3) | 22.4 (11.1) | 31.3 (21.8)        |
| H <sup>+</sup> R[N <sub>ω</sub> ]-cg.g.gtg(-00/+00/+0+/-00/--0/-00)  | 13.4 (17.5) | 13.2 (15.6) | 17.4 (8.7)  | 26.7 (19.8)        |
| H <sup>+</sup> R[N <sub>ω</sub> ]-tgggtg(-00/+00/-00/+00/--0/-00)    | 13.1 (13.2) | 15.0 (13.6) | 15.8 (3.1)  | 22.6 (11.8)        |
| H <sup>+</sup> R[N <sub>ω</sub> ]-cgggtg(+00/+00/--0/-00/+00/+0+)    | 12.1 (14.1) | 12.3 (12.8) | 19.9 (9.1)  | 25.3 (16.3)        |
| H <sup>+</sup> R[N <sub>ω</sub> ]-tgtgtg(+00/-00/+00/-00/+0+/-0+)    | 13.4 (15.2) | 15.5 (15.6) | 23.5 (12.4) | 30.6 (21.5)        |
| H <sup>+</sup> R[N <sub>ω</sub> ]-cg.g.g.tg(-00/+0+/-00/--0/--0/-00) | 12.1 (15.4) | 13.2 (14.9) | 19.0 (9.5)  | 26.9 (19.2)        |
| H <sup>+</sup> R[N <sub>α</sub> ]-g.g.g.gt(-00/+00/-00/+00/-00/+00)  | 12.9 (23.0) | 9.8 (18.4)  | 9.1 (6.4)   | 5.6 (4.8)          |
| H <sup>+</sup> R[N <sub>α</sub> ]-gggg.t(-00/+00/-00/+00/-00/+00)    | 13.9 (23.2) | 10.2 (18.0) | 5.5 (2.0)   | 1.6 ( <b>0.0</b> ) |
| H <sup>+</sup> R[N <sub>α</sub> ]-ggg.g.t(-00/+00/-00/+00/-00/+00)   | 14.4 (17.2) | 13.1 (14.4) | 14.4 (4.5)  | 14.4 (6.4)         |

<sup>a</sup> Gibbs energies in parentheses. **Ground conformations in bold.** All values calculated at the level of theory indicated using the 6-311+G(2d,2p) basis set with conformations, zero-point energies, and thermal energies calculated at B3LYP/6-311+G(d,p) level of theory.

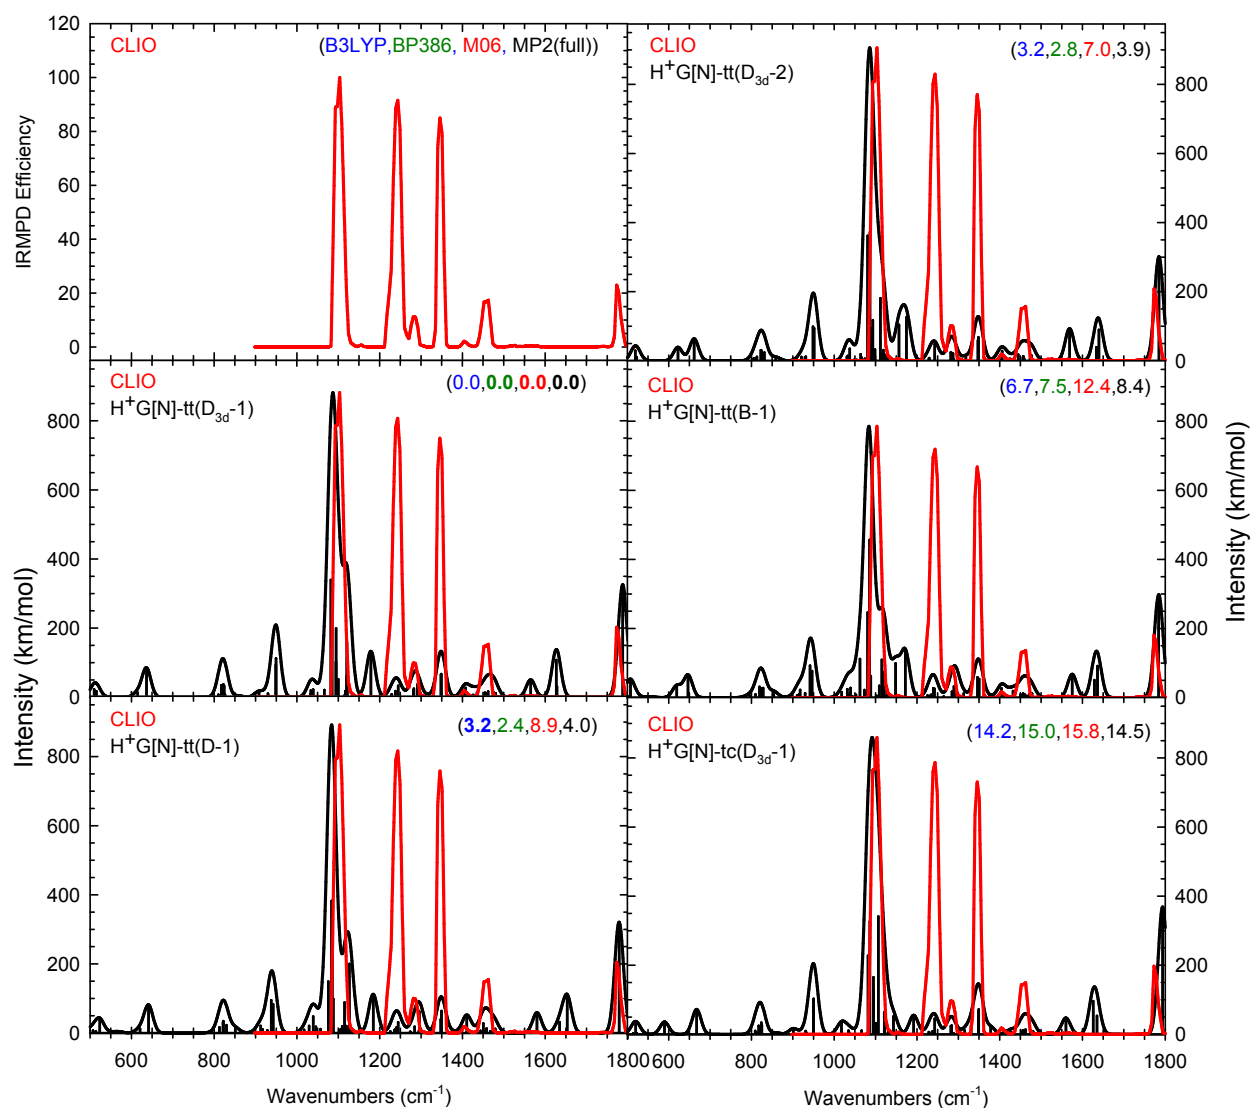

**Figure S1.** Comparison of the measured IRMPD actions spectrum of  $(\text{Gly})\text{H}^+(\text{18C6})$  with the theoretical linear IR spectra for low-lying conformations of  $(\text{Gly})\text{H}^+(\text{18C6})$  at 298 K. Relative energies in kJ/mol calculated at four levels of theory are given in parentheses in each panel. To facilitate comparison of the measured and computed spectra, the IRMPD spectrum is overlaid (in red) with the computed spectrum and normalized to match the intensity of the most intense feature.



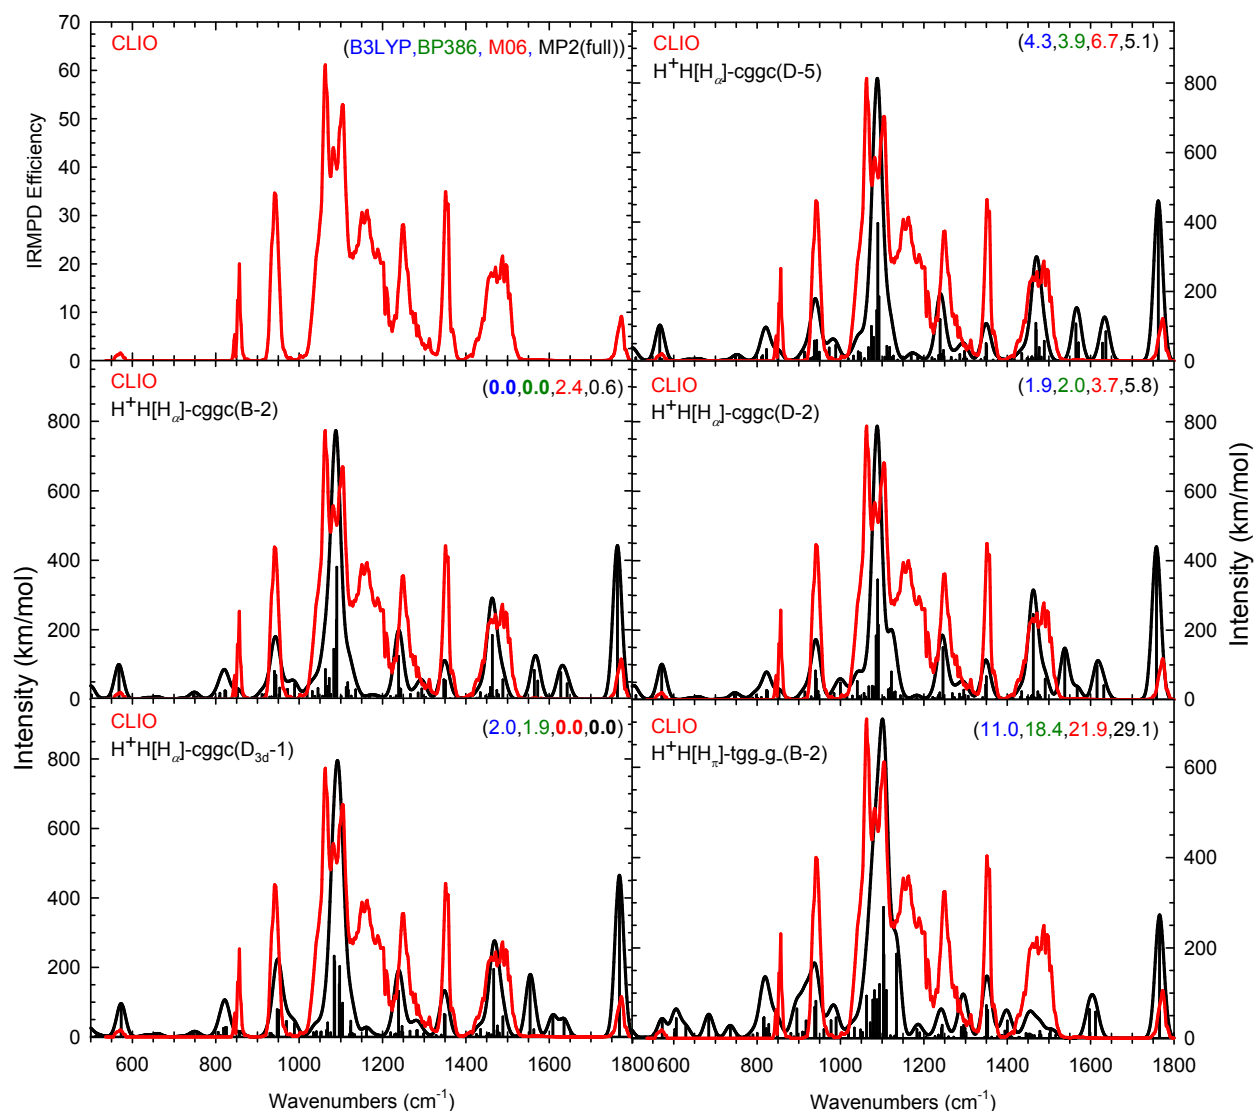

**Figure S2.** Comparison of the measured IRMPD actions spectrum of  $(\text{His})\text{H}^+(18\text{C}6)$  with the theoretical linear IR spectra for low-lying conformations of  $(\text{Gly})\text{H}^+(18\text{C}6)$  at 298 K. Relative energies in kJ/mol calculated at four levels of theory are given in parentheses in each panel. To facilitate comparison of the measured and computed spectra, the IRMPD spectrum is overlaid (in red) with the computed spectrum and normalized to match the intensity of the most intense feature.

**Structures (Gly)H<sup>+</sup>-18C6**H<sup>+</sup>G[N]-tt(-00/+00/-00/+00/-00/+00) #0

|   |           |           |           |
|---|-----------|-----------|-----------|
| N | -0.051338 | -0.000019 | 0.297683  |
| H | 0.475639  | 0.842463  | -0.002368 |
| C | -0.327437 | -0.000246 | 1.751617  |
| H | -0.962416 | 0.000091  | -0.185845 |
| H | 0.475576  | -0.842462 | -0.002609 |
| C | 0.940131  | -0.000226 | 2.582566  |
| H | -0.924327 | 0.876806  | 2.001526  |
| H | -0.924165 | -0.877475 | 2.001280  |
| O | 2.058928  | 0.000119  | 2.142706  |
| O | 0.627904  | -0.000627 | 3.886582  |
| H | 1.447975  | -0.000576 | 4.405781  |
| H | 1.014126  | 4.503598  | -0.711299 |
| C | 0.481224  | 3.564772  | -0.910484 |
| O | 1.274909  | 2.458699  | -0.475539 |
| C | -0.837849 | 3.581169  | -0.172923 |
| H | 0.300540  | 3.489669  | -1.989980 |
| C | 2.526348  | 2.382712  | -1.173606 |
| O | -1.572686 | 2.413819  | -0.522031 |
| H | -1.389678 | 4.484148  | -0.466988 |
| H | -0.673290 | 3.623546  | 0.913296  |
| C | 3.317523  | 1.188346  | -0.696360 |
| H | 2.338206  | 2.303441  | -2.251331 |
| H | 3.104678  | 3.295914  | -0.984914 |
| C | -2.914593 | 2.401963  | -0.052932 |
| O | 2.633004  | 0.000090  | -1.077147 |
| H | 4.310877  | 1.223305  | -1.165516 |
| H | 3.444636  | 1.220068  | 0.391779  |
| C | -3.613554 | 1.188887  | -0.622726 |
| H | -3.447570 | 3.302728  | -0.386298 |
| H | -2.940842 | 2.380863  | 1.046070  |
| C | 3.317524  | -1.188167 | -0.696354 |
| O | -2.982432 | 0.000025  | -0.140479 |
| H | -3.569799 | 1.213767  | -1.718726 |
| H | -4.667093 | 1.203543  | -0.314982 |
| C | 2.526389  | -2.382524 | -1.173682 |
| H | 4.310905  | -1.223092 | -1.165450 |
| H | 3.444570  | -1.219916 | 0.391793  |
| C | -3.613517 | -1.188762 | -0.622957 |
| O | 1.274940  | -2.458588 | -0.475630 |
| H | 2.338254  | -2.303186 | -2.251402 |
| H | 3.104734  | -3.295729 | -0.985044 |
| C | -2.914610 | -2.401928 | -0.053295 |
| H | -3.569674 | -1.213475 | -1.718958 |
| H | -4.667082 | -1.203466 | -0.315305 |
| C | 0.481287  | -3.564649 | -0.910667 |
| O | -1.572684 | -2.413759 | -0.522354 |
| H | -3.447595 | -3.302638 | -0.386794 |
| H | -2.940891 | -2.380962 | 1.045709  |
| C | -0.837845 | -3.581093 | -0.173213 |
| H | 0.300692  | -3.489518 | -1.990176 |
| H | 1.014176  | -4.503481 | -0.711469 |
| H | -1.389619 | -4.484085 | -0.467348 |
| H | -0.673377 | -3.623501 | 0.913020  |

H<sup>+</sup>G[N]-tt(+0+/-00/-00/+00/--0/-00) #34

|   |           |           |           |
|---|-----------|-----------|-----------|
| C | -2.385454 | -2.285082 | -1.393918 |
| C | -1.187783 | -3.133902 | -1.037179 |
| O | -0.000216 | -2.402336 | -1.322761 |
| C | 1.187224  | -3.134116 | -1.037197 |
| C | 2.385043  | -2.285503 | -1.393935 |
| O | 2.463374  | -1.160458 | -0.509552 |
| C | 3.561962  | -0.297065 | -0.801926 |
| C | 3.633506  | 0.800939  | 0.245783  |
| O | 2.472369  | 1.628728  | 0.297584  |
| C | 2.401630  | 2.632308  | -0.711904 |
| C | 1.193911  | 3.503326  | -0.452683 |
| O | 0.000288  | 2.732664  | -0.625963 |
| C | -1.193215 | 3.503539  | -0.452810 |
| C | -2.401067 | 2.632710  | -0.712053 |
| O | -2.472032 | 1.629203  | 0.297491  |
| C | -3.633335 | 0.801644  | 0.245714  |
| C | -3.562011 | -0.296417 | -0.801951 |
| O | -2.463574 | -1.159999 | -0.509563 |
| H | -3.296382 | -2.889033 | -1.297708 |
| H | -2.304903 | -1.935613 | -2.430821 |
| H | -1.222496 | -4.053689 | -1.637672 |
| H | -1.216701 | -3.409165 | 0.024152  |
| H | 1.221766  | -4.053904 | -1.637697 |
| H | 1.216104  | -3.409390 | 0.024132  |
| H | 2.304540  | -1.935994 | -2.430829 |
| H | 3.295863  | -2.889621 | -1.297754 |
| H | 3.451331  | 0.114533  | -1.813871 |
| H | 4.502056  | -0.864407 | -0.773493 |
| H | 4.530012  | 1.408556  | 0.067517  |
| H | 3.722482  | 0.351530  | 1.237143  |
| H | 2.325924  | 2.184183  | -1.710456 |
| H | 3.301110  | 3.261848  | -0.683517 |
| H | 1.198675  | 4.340146  | -1.162537 |
| H | 1.231626  | 3.909729  | 0.565734  |
| H | -1.197787 | 4.340316  | -1.162717 |
| H | -1.230929 | 3.910011  | 0.565580  |
| H | -2.325380 | 2.184512  | -1.710574 |
| H | -3.300442 | 3.262405  | -0.683755 |
| H | -4.529719 | 1.409434  | 0.067421  |
| H | -3.722405 | 0.352293  | 1.237092  |
| H | -3.451330 | 0.115114  | -1.813917 |
| H | -4.502208 | -0.863586 | -0.773471 |
| C | -0.000037 | 0.232712  | 1.917119  |
| C | -0.000164 | -1.098872 | 2.639225  |
| O | -0.000192 | -2.174213 | 2.097773  |
| O | -0.000240 | -0.909147 | 3.965694  |
| N | 0.000001  | 0.046265  | 0.449572  |
| H | 0.883176  | 0.808782  | 2.196033  |
| H | -0.883179 | 0.808921  | 2.195969  |
| H | -0.000319 | -1.774175 | 4.405745  |
| H | -0.840862 | -0.460994 | 0.121130  |
| H | 0.840779  | -0.461169 | 0.121188  |
| H | 0.000114  | 0.981714  | 0.005615  |

H<sup>+</sup>G[N]-tt(+00/-00/+00/-00/+00/-00) #85

|   |           |           |           |
|---|-----------|-----------|-----------|
| C | -3.658626 | 0.917225  | -0.091294 |
| C | -3.741490 | -0.486080 | -0.646360 |
| O | -2.709302 | -1.290540 | -0.082953 |
| C | -2.696210 | -2.614643 | -0.609635 |
| C | -1.490564 | -3.363270 | -0.087172 |
| O | -0.301938 | -2.735211 | -0.573649 |
| C | 0.879601  | -3.538547 | -0.473344 |
| C | 1.987121  | -2.871628 | -1.258040 |
| O | 2.263314  | -1.608337 | -0.672540 |
| C | 3.268177  | -0.870417 | -1.359874 |
| C | 3.471663  | 0.461895  | -0.674780 |
| O | 2.282478  | 1.250913  | -0.817503 |
| C | 2.421058  | 2.594792  | -0.349119 |
| C | 1.247614  | 3.410848  | -0.842923 |
| O | 0.038810  | 2.923683  | -0.261105 |
| C | -1.123314 | 3.518627  | -0.827852 |
| C | -2.360088 | 2.922495  | -0.195862 |
| O | -2.437180 | 1.529785  | -0.513862 |
| H | -3.715300 | 0.902879  | 1.005230  |
| H | -4.512210 | 1.493219  | -0.470201 |
| H | -3.641192 | -0.459542 | -1.739368 |
| H | -4.727914 | -0.903145 | -0.401096 |
| H | -2.658510 | -2.580443 | -1.706167 |
| H | -3.606824 | -3.152183 | -0.311283 |
| H | -1.541135 | -4.397129 | -0.449961 |
| H | -1.488482 | -3.386754 | 1.010526  |
| H | 0.689227  | -4.532748 | -0.895350 |
| H | 1.169466  | -3.655929 | 0.578513  |
| H | 1.680336  | -2.748306 | -2.305695 |
| H | 2.877944  | -3.514983 | -1.232982 |
| H | 2.972754  | -0.715381 | -2.406406 |
| H | 4.219602  | -1.420115 | -1.347623 |
| H | 4.311458  | 0.979281  | -1.155118 |
| H | 3.696990  | 0.317870  | 0.386217  |
| H | 3.342582  | 3.035809  | -0.749039 |
| H | 2.479632  | 2.607284  | 0.746099  |
| H | 1.187732  | 3.341532  | -1.936669 |
| H | 1.401605  | 4.463674  | -0.569943 |
| H | -1.141223 | 3.349045  | -1.912599 |
| H | -1.126742 | 4.602904  | -0.649511 |
| H | -3.242114 | 3.442168  | -0.590671 |
| H | -2.341527 | 3.060997  | 0.893559  |
| C | -0.377510 | 0.144067  | 1.713303  |
| C | 0.848332  | -0.050508 | 2.584775  |
| O | 1.981990  | 0.129508  | 2.226871  |
| O | 0.484288  | -0.397988 | 3.828367  |
| N | -0.069534 | 0.032576  | 0.267803  |
| H | -0.750905 | 1.151815  | 1.906801  |
| H | -1.163929 | -0.563830 | 1.966276  |
| H | 1.278797  | -0.442892 | 4.384451  |
| H | -0.829084 | 0.507437  | -0.245394 |
| H | -0.039587 | -0.955781 | -0.040652 |
| H | 0.831023  | 0.481578  | 0.003480  |

H<sup>+</sup>G[N]-tt(+0+/-00/-00/+0+/-00/-00) #3053

|   |           |           |           |
|---|-----------|-----------|-----------|
| C | 2.537920  | -2.116540 | -1.046735 |
| C | 3.313898  | -0.819622 | -1.044964 |
| O | 2.903654  | -0.025686 | 0.068898  |
| C | 3.513883  | 1.260958  | 0.134799  |
| C | 2.781838  | 2.316661  | -0.675344 |
| O | 1.463983  | 2.488987  | -0.145299 |
| C | 0.756575  | 3.571399  | -0.757954 |
| C | -0.593694 | 3.728579  | -0.098716 |
| O | -1.361571 | 2.557110  | -0.345357 |
| C | -2.693830 | 2.630304  | 0.149212  |
| C | -3.445537 | 1.390325  | -0.274916 |
| O | -2.898166 | 0.245643  | 0.387992  |
| C | -3.574089 | -0.985383 | 0.090338  |
| C | -3.027271 | -1.668139 | -1.150737 |
| O | -1.665679 | -1.979173 | -0.900857 |
| C | -1.009941 | -2.650354 | -1.969300 |
| C | 0.386104  | -3.029230 | -1.529909 |
| O | 1.160829  | -1.842696 | -1.316645 |
| H | 2.636848  | -2.627862 | -0.081648 |
| H | 2.946493  | -2.767407 | -1.830241 |
| H | 3.139235  | -0.288746 | -1.988834 |
| H | 4.385668  | -1.045523 | -0.966606 |
| H | 3.513055  | 1.549228  | 1.188937  |
| H | 4.558467  | 1.212333  | -0.197218 |
| H | 2.721168  | 2.040962  | -1.736214 |
| H | 3.336305  | 3.261717  | -0.603210 |
| H | 1.325507  | 4.501808  | -0.636828 |
| H | 0.631572  | 3.375592  | -1.830350 |
| H | -1.091512 | 4.611250  | -0.522940 |
| H | -0.474900 | 3.889502  | 0.981745  |
| H | -2.693584 | 2.720197  | 1.244253  |
| H | -3.206598 | 3.508910  | -0.265615 |
| H | -3.379568 | 1.275581  | -1.363108 |
| H | -4.501168 | 1.501470  | 0.002356  |
| H | -3.418681 | -1.631695 | 0.956219  |
| H | -4.649665 | -0.807087 | -0.017813 |
| H | -3.607956 | -2.582876 | -1.337930 |
| H | -3.119016 | -1.025277 | -2.037767 |
| H | -0.969873 | -2.005576 | -2.857927 |
| H | -1.552425 | -3.568615 | -2.233633 |
| H | 0.852732  | -3.633126 | -2.318420 |
| H | 0.346666  | -3.615703 | -0.605752 |
| C | 0.332668  | -0.027758 | 2.012163  |
| C | 0.366992  | -1.457042 | 2.519943  |
| O | 0.420976  | -2.432730 | 1.819201  |
| O | 0.367917  | -1.471988 | 3.860102  |
| N | 0.011666  | 0.031765  | 0.566978  |
| H | 1.321138  | 0.404445  | 2.169901  |
| H | -0.392625 | 0.559137  | 2.574597  |
| H | 0.442236  | -2.391198 | 4.162737  |
| H | 0.383769  | 0.912493  | 0.174919  |
| H | 0.436850  | -0.750963 | 0.031601  |
| H | -1.010446 | 0.013988  | 0.404374  |

H<sup>+</sup>G[N]-tt(+0+/+00/-00/+0+/+00/-00) #57

|   |           |           |           |
|---|-----------|-----------|-----------|
| C | 2.461581  | -2.198816 | -1.049610 |
| C | 3.287661  | -0.933101 | -1.032415 |
| O | 2.901495  | -0.132819 | 0.085438  |
| C | 3.560918  | 1.128726  | 0.165806  |
| C | 2.877165  | 2.218042  | -0.642016 |
| O | 1.561794  | 2.436613  | -0.122902 |
| C | 0.899344  | 3.544079  | -0.741584 |
| C | -0.450896 | 3.750217  | -0.096146 |
| O | -1.259129 | 2.607870  | -0.350428 |
| C | -2.592082 | 2.731043  | 0.132226  |
| C | -3.382769 | 1.514367  | -0.288782 |
| O | -2.876850 | 0.356514  | 0.384092  |
| C | -3.595970 | -0.852419 | 0.098115  |
| C | -3.085454 | -1.558733 | -1.145651 |
| O | -1.731753 | -1.910735 | -0.908617 |
| C | -1.101822 | -2.592294 | -1.985830 |
| C | 0.280299  | -3.025628 | -1.552470 |
| O | 1.097731  | -1.870366 | -1.326312 |
| H | 2.533683  | -2.720789 | -0.087793 |
| H | 2.850197  | -2.859195 | -1.835308 |
| H | 3.140437  | -0.388468 | -1.973155 |
| H | 4.349170  | -1.201577 | -0.949055 |
| H | 4.605357  | 1.041917  | -0.158787 |
| H | 3.563154  | 1.408972  | 1.222089  |
| H | 2.815944  | 1.953065  | -1.705548 |
| H | 3.466367  | 3.140733  | -0.557294 |
| H | 0.778318  | 3.353199  | -1.815307 |
| H | 1.500042  | 4.453406  | -0.614198 |
| H | -0.911366 | 4.650553  | -0.525429 |
| H | -0.337600 | 3.907239  | 0.985495  |
| H | -3.070627 | 3.623668  | -0.293465 |
| H | -2.597706 | 2.829244  | 1.226540  |
| H | -3.315079 | 1.390724  | -1.375859 |
| H | -4.435452 | 1.662449  | -0.017685 |
| H | -4.666283 | -0.639250 | 0.001243  |
| H | -3.451998 | -1.500043 | 0.964996  |
| H | -3.167833 | -0.918895 | -2.035780 |
| H | -3.696768 | -2.455803 | -1.320696 |
| H | -1.039747 | -1.938583 | -2.866634 |
| H | -1.676379 | -3.487827 | -2.260139 |
| H | 0.724863  | -3.636913 | -2.347997 |
| H | 0.220021  | -3.620552 | -0.634917 |
| C | 0.328381  | -0.058629 | 2.012982  |
| C | 0.280663  | -1.492775 | 2.505412  |
| O | 0.294008  | -2.462923 | 1.795148  |
| O | 0.262704  | -1.521564 | 3.845413  |
| N | 0.017064  | 0.035169  | 0.567391  |
| H | 1.339614  | 0.314096  | 2.178044  |
| H | -0.364314 | 0.562713  | 2.579410  |
| H | 0.287021  | -2.446516 | 4.138567  |
| H | 0.429329  | 0.904057  | 0.188821  |
| H | -1.004387 | 0.064803  | 0.400426  |
| H | 0.410469  | -0.757804 | 0.022813  |

H<sup>+</sup>G[N]-tt(++0/+00/--0/-00/+0+/+0+) #183

|   |           |           |           |
|---|-----------|-----------|-----------|
| C | -3.333103 | 1.676079  | 0.185148  |
| C | -3.429049 | 0.423774  | -0.671861 |
| O | -2.643444 | -0.601211 | -0.057270 |
| C | -2.797637 | -1.922251 | -0.597980 |
| C | -2.027822 | -2.127558 | -1.899015 |
| O | -0.628311 | -1.901459 | -1.761722 |
| C | 0.132153  | -3.028223 | -1.325878 |
| C | 1.600605  | -2.716478 | -1.507616 |
| O | 2.007088  | -1.700656 | -0.581547 |
| C | 3.322101  | -1.206357 | -0.835071 |
| C | 3.706017  | -0.209357 | 0.246530  |
| O | 2.824028  | 0.907831  | 0.346190  |
| C | 3.008808  | 1.915475  | -0.644891 |
| C | 2.051402  | 3.054188  | -0.373746 |
| O | 0.706124  | 2.604255  | -0.566732 |
| C | -0.263539 | 3.652901  | -0.471369 |
| C | -1.639141 | 3.097724  | -0.764273 |
| O | -2.007506 | 2.199004  | 0.278800  |
| H | -3.635919 | 1.436095  | 1.206492  |
| H | -4.020159 | 2.437049  | -0.205262 |
| H | -3.085367 | 0.615878  | -1.695494 |
| H | -4.478974 | 0.107138  | -0.718609 |
| H | -3.861661 | -2.134105 | -0.760872 |
| H | -2.431183 | -2.591295 | 0.181875  |
| H | -2.369563 | -1.428289 | -2.665969 |
| H | -2.224073 | -3.142400 | -2.270230 |
| H | -0.109879 | -3.906262 | -1.939501 |
| H | -0.077878 | -3.266514 | -0.276592 |
| H | 1.778543  | -2.371720 | -2.533300 |
| H | 2.190305  | -3.625189 | -1.333271 |
| H | 3.358754  | -0.755096 | -1.835082 |
| H | 4.045843  | -2.032315 | -0.815061 |
| H | 4.736126  | 0.127400  | 0.071921  |
| H | 3.673505  | -0.698991 | 1.222200  |
| H | 2.828090  | 1.517627  | -1.650881 |
| H | 4.036236  | 2.301631  | -0.604187 |
| H | 2.269087  | 3.873122  | -1.070703 |
| H | 2.179447  | 3.425231  | 0.650794  |
| H | -0.031105 | 4.435632  | -1.204299 |
| H | -0.240792 | 4.095579  | 0.532183  |
| H | -1.634364 | 2.593374  | -1.739201 |
| H | -2.350312 | 3.933144  | -0.811598 |
| C | 0.138276  | 0.143718  | 2.045617  |
| C | -0.196238 | -1.187912 | 2.687452  |
| O | -0.514246 | -2.178814 | 2.080489  |
| O | -0.090361 | -1.107575 | 4.019601  |
| N | 0.038208  | 0.052394  | 0.574346  |
| H | 1.149022  | 0.449935  | 2.317438  |
| H | -0.555694 | 0.906922  | 2.401430  |
| H | -0.314470 | -1.969749 | 4.404879  |
| H | 0.249946  | 0.976682  | 0.157521  |
| H | -0.921358 | -0.219962 | 0.283998  |
| H | 0.716422  | -0.622655 | 0.178204  |

H<sup>+</sup>G[N]-tt(+00/-00/+00/--0/-00/+0+) #150

|   |           |           |           |
|---|-----------|-----------|-----------|
| C | 0.686021  | -3.179709 | -1.165419 |
| C | 2.033866  | -2.565778 | -1.465600 |
| O | 2.333722  | -1.578096 | -0.483398 |
| C | 3.548435  | -0.885704 | -0.732614 |
| C | 3.732537  | 0.157610  | 0.353462  |
| O | 2.690740  | 1.142504  | 0.374941  |
| C | 2.887979  | 2.250378  | -0.510856 |
| C | 1.855511  | 3.310725  | -0.205294 |
| O | 0.561832  | 2.791984  | -0.490810 |
| C | -0.484757 | 3.721594  | -0.236116 |
| C | -1.809165 | 3.095302  | -0.605691 |
| O | -2.084545 | 2.004113  | 0.280632  |
| C | -3.406746 | 1.459906  | 0.164870  |
| C | -3.535883 | 0.450115  | -0.961042 |
| O | -2.641685 | -0.618265 | -0.690917 |
| C | -2.624452 | -1.620682 | -1.702180 |
| C | -1.651942 | -2.710131 | -1.313484 |
| O | -0.323989 | -2.177079 | -1.299510 |
| H | 0.664676  | -3.600289 | -0.153181 |
| H | 0.504919  | -3.989512 | -1.883684 |
| H | 2.021102  | -2.109167 | -2.464156 |
| H | 2.796917  | -3.356199 | -1.455479 |
| H | 3.523846  | -0.423528 | -1.729517 |
| H | 4.403149  | -1.577042 | -0.706206 |
| H | 4.707376  | 0.645378  | 0.240720  |
| H | 3.707601  | -0.327979 | 1.331447  |
| H | 2.799529  | 1.930841  | -1.555864 |
| H | 3.888427  | 2.672631  | -0.356698 |
| H | 2.060170  | 4.194506  | -0.825286 |
| H | 1.922282  | 3.607170  | 0.850204  |
| H | -0.345104 | 4.628404  | -0.840828 |
| H | -0.487302 | 4.012246  | 0.823147  |
| H | -1.780329 | 2.751667  | -1.646180 |
| H | -2.597335 | 3.852001  | -0.508727 |
| H | -4.134823 | 2.268053  | 0.031205  |
| H | -3.611560 | 0.969779  | 1.118735  |
| H | -3.304970 | 0.904048  | -1.935065 |
| H | -4.574491 | 0.091014  | -0.998353 |
| H | -2.332192 | -1.179252 | -2.664509 |
| H | -3.623357 | -2.064449 | -1.814349 |
| H | -1.717359 | -3.515730 | -2.056050 |
| H | -1.901734 | -3.116178 | -0.327600 |
| C | 0.066627  | -0.108171 | 2.096186  |
| C | -0.510345 | -1.428987 | 2.569397  |
| O | -0.768640 | -2.360945 | 1.854399  |
| O | -0.658538 | -1.417110 | 3.900090  |
| N | 0.018304  | 0.023300  | 0.617952  |
| H | 1.104943  | -0.052058 | 2.427040  |
| H | -0.469655 | 0.722461  | 2.554151  |
| H | -0.987613 | -2.283845 | 4.187502  |
| H | 0.899355  | 0.454296  | 0.292672  |
| H | -0.766206 | 0.636506  | 0.336093  |
| H | -0.095690 | -0.884511 | 0.126029  |

H<sup>+</sup>G[N]-tt(+00/-00/+00/--0/-00/+0+) #197

|   |           |           |           |
|---|-----------|-----------|-----------|
| C | -2.640055 | -1.604876 | -1.696952 |
| C | -1.682279 | -2.702577 | -1.295250 |
| O | -0.347858 | -2.185640 | -1.285940 |
| C | 0.651616  | -3.198016 | -1.147648 |
| C | 2.004408  | -2.599360 | -1.456202 |
| O | 2.315975  | -1.606484 | -0.482824 |
| C | 3.534928  | -0.925600 | -0.742782 |
| C | 3.739065  | 0.116173  | 0.341187  |
| O | 2.708890  | 1.113289  | 0.369928  |
| C | 2.916039  | 2.222334  | -0.511731 |
| C | 1.892473  | 3.290221  | -0.202397 |
| O | 0.594347  | 2.784079  | -0.490714 |
| C | -0.443576 | 3.724248  | -0.239318 |
| C | -1.773191 | 3.113010  | -0.615438 |
| O | -2.066157 | 2.024493  | 0.268709  |
| C | -3.394813 | 1.497595  | 0.145786  |
| C | -3.528711 | 0.483292  | -0.975635 |
| O | -2.648521 | -0.593709 | -0.694168 |
| H | -3.644024 | -2.037054 | -1.809024 |
| H | -2.338332 | -1.175242 | -2.661663 |
| H | -1.756969 | -3.515418 | -2.028963 |
| H | -1.938072 | -3.094181 | -0.305113 |
| H | 0.460017  | -4.010708 | -1.859825 |
| H | 0.629216  | -3.611531 | -0.132532 |
| H | 1.993206  | -2.150722 | -2.458401 |
| H | 2.760237  | -3.396606 | -1.441659 |
| H | 3.505826  | -0.463258 | -1.739464 |
| H | 4.383231  | -1.624978 | -0.723625 |
| H | 4.718711  | 0.592315  | 0.220636  |
| H | 3.715856  | -0.368546 | 1.319672  |
| H | 2.825312  | 1.907339  | -1.558011 |
| H | 3.919935  | 2.635773  | -0.355868 |
| H | 2.105160  | 4.174817  | -0.818473 |
| H | 1.961077  | 3.581512  | 0.854404  |
| H | -0.291578 | 4.630097  | -0.842487 |
| H | -0.447663 | 4.014074  | 0.820148  |
| H | -1.743305 | 2.769887  | -1.656126 |
| H | -2.553001 | 3.878720  | -0.521828 |
| H | -4.110783 | 2.314634  | 0.001394  |
| H | -3.614183 | 1.015953  | 1.100750  |
| H | -3.286713 | 0.929161  | -1.950631 |
| H | -4.571138 | 0.135983  | -1.017180 |
| C | 0.072444  | -0.098899 | 2.090470  |
| C | -0.529235 | -1.403143 | 2.578685  |
| O | -0.803196 | -2.338948 | 1.874526  |
| O | -0.678458 | -1.372966 | 3.908966  |
| N | 0.017535  | 0.020704  | 0.611576  |
| H | 1.114043  | -0.062458 | 2.413706  |
| H | -0.442771 | 0.747261  | 2.544042  |
| H | -1.022342 | -2.230623 | 4.206187  |
| H | -0.765456 | 0.634896  | 0.327973  |
| H | -0.101954 | -0.890219 | 0.126782  |
| H | 0.898875  | 0.444880  | 0.279637  |

H<sup>+</sup>G[N]-tt(--0/-00/+00/-00/+0+/-00) #308

|   |           |           |           |
|---|-----------|-----------|-----------|
| C | -2.612554 | 2.396970  | -0.848338 |
| C | -3.454168 | 1.631806  | 0.159787  |
| O | -3.011899 | 0.287854  | 0.350649  |
| C | -3.650448 | -0.671780 | -0.488866 |
| C | -3.087913 | -2.043777 | -0.195061 |
| O | -1.720371 | -2.090025 | -0.607352 |
| C | -1.155544 | -3.406180 | -0.625175 |
| C | 0.118143  | -3.378460 | -1.439247 |
| O | 1.037802  | -2.490492 | -0.823406 |
| C | 2.249792  | -2.342979 | -1.554106 |
| C | 3.134284  | -1.325968 | -0.870161 |
| O | 2.498427  | -0.040996 | -0.918674 |
| C | 3.367068  | 1.042502  | -0.582581 |
| C | 2.663983  | 2.348573  | -0.874080 |
| O | 1.572364  | 2.508067  | 0.032498  |
| C | 0.793471  | 3.685015  | -0.176133 |
| C | -0.437921 | 3.429882  | -1.029442 |
| O | -1.280115 | 2.501462  | -0.336067 |
| H | -3.039326 | 3.399774  | -0.976777 |
| H | -2.602830 | 1.902227  | -1.828472 |
| H | -4.505083 | 1.652965  | -0.152515 |
| H | -3.380721 | 2.123187  | 1.132710  |
| H | -3.493816 | -0.432646 | -1.548457 |
| H | -4.730646 | -0.682744 | -0.291509 |
| H | -3.668406 | -2.787508 | -0.755068 |
| H | -3.174711 | -2.272758 | 0.874949  |
| H | -1.859049 | -4.107519 | -1.089823 |
| H | -0.954665 | -3.743765 | 0.399321  |
| H | -0.102116 | -3.047255 | -2.463432 |
| H | 0.531951  | -4.395746 | -1.487863 |
| H | 2.031946  | -2.019660 | -2.581132 |
| H | 2.786030  | -3.301195 | -1.600687 |
| H | 4.091001  | -1.281458 | -1.405192 |
| H | 3.318078  | -1.608636 | 0.170863  |
| H | 4.277831  | 0.990208  | -1.192532 |
| H | 3.653336  | 0.986967  | 0.474981  |
| H | 2.311409  | 2.350393  | -1.913391 |
| H | 3.377991  | 3.172920  | -0.747192 |
| H | 1.397197  | 4.476163  | -0.636066 |
| H | 0.478531  | 4.032708  | 0.810934  |
| H | -0.171184 | 3.031344  | -2.017013 |
| H | -0.972544 | 4.377020  | -1.174884 |
| C | -0.141548 | 0.204467  | 1.938679  |
| C | 0.894573  | -0.613505 | 2.683782  |
| O | 1.899212  | -1.058750 | 2.194643  |
| O | 0.554275  | -0.730479 | 3.975290  |
| N | -0.027066 | 0.042064  | 0.469904  |
| H | 0.029138  | 1.254801  | 2.183230  |
| H | -1.152414 | -0.053269 | 2.249551  |
| H | 1.262370  | -1.201781 | 4.442925  |
| H | -0.465290 | 0.870086  | 0.030247  |
| H | -0.525436 | -0.798237 | 0.129037  |
| H | 0.956012  | -0.013559 | 0.138940  |

H<sup>+</sup>G[N]-tt(+00/-00/+00/--0/+00/+0+) #48

|   |           |           |           |
|---|-----------|-----------|-----------|
| C | 3.609022  | -0.953431 | -0.534287 |
| C | 3.744635  | 0.157774  | 0.490583  |
| O | 2.709172  | 1.142598  | 0.402302  |
| C | 2.950029  | 2.196440  | -0.535812 |
| C | 1.887163  | 3.255486  | -0.352563 |
| O | 0.618404  | 2.687235  | -0.653391 |
| C | -0.458781 | 3.608862  | -0.511576 |
| C | -1.755307 | 2.923955  | -0.876841 |
| O | -2.050735 | 1.914560  | 0.091090  |
| C | -3.350421 | 1.318722  | -0.033796 |
| C | -3.435810 | 0.281873  | -1.141057 |
| O | -2.532938 | -0.772018 | -0.836577 |
| C | -2.484094 | -1.796499 | -1.815715 |
| C | -1.546653 | -2.878765 | -1.329807 |
| O | -0.234669 | -2.324980 | -1.178018 |
| C | 0.789701  | -3.302166 | -0.982152 |
| C | 2.138506  | -2.674941 | -1.250814 |
| O | 2.390456  | -1.649600 | -0.295154 |
| H | 4.467000  | -1.633466 | -0.434273 |
| H | 3.617720  | -0.552791 | -1.557292 |
| H | 4.726956  | 0.633311  | 0.388593  |
| H | 3.677027  | -0.262662 | 1.496333  |
| H | 2.925049  | 1.813682  | -1.563026 |
| H | 3.935504  | 2.641202  | -0.350743 |
| H | 2.102235  | 4.097149  | -1.025296 |
| H | 1.901766  | 3.627432  | 0.680784  |
| H | -0.313107 | 4.467092  | -1.181798 |
| H | -0.507072 | 3.981203  | 0.520409  |
| H | -1.673962 | 2.491314  | -1.880897 |
| H | -2.559172 | 3.670926  | -0.883434 |
| H | -4.101054 | 2.100183  | -0.201327 |
| H | -3.542180 | 0.841888  | 0.926703  |
| H | -3.196326 | 0.714345  | -2.122683 |
| H | -4.467615 | -0.095061 | -1.186695 |
| H | -2.131143 | -1.393353 | -2.775085 |
| H | -3.479296 | -2.236398 | -1.971101 |
| H | -1.523749 | -3.690150 | -2.067480 |
| H | -1.897339 | -3.286311 | -0.373306 |
| H | 0.650224  | -4.134224 | -1.683208 |
| H | 0.743477  | -3.705100 | 0.038215  |
| H | 2.153752  | -2.254105 | -2.264834 |
| H | 2.911278  | -3.453514 | -1.187949 |
| C | 0.329395  | -0.447951 | 2.000546  |
| C | -0.923468 | -0.795241 | 2.780902  |
| O | -2.043087 | -0.509713 | 2.450843  |
| O | -0.595678 | -1.440329 | 3.910815  |
| N | 0.024996  | 0.006880  | 0.623129  |
| H | 1.005899  | -1.299794 | 1.948764  |
| H | 0.849107  | 0.355336  | 2.527140  |
| H | -1.404510 | -1.606288 | 4.421078  |
| H | -0.776117 | 0.668305  | 0.568277  |
| H | -0.181191 | -0.786922 | -0.009176 |
| H | 0.860975  | 0.491869  | 0.260465  |

H<sup>+</sup>G[N]-tt(--0/-00/+00/-00/+0+/-00) #151

|   |           |           |           |
|---|-----------|-----------|-----------|
| C | 3.447912  | 1.647064  | 0.162705  |
| C | 2.603396  | 2.406920  | -0.846970 |
| O | 1.269934  | 2.506026  | -0.336288 |
| C | 0.423486  | 3.426063  | -1.035775 |
| C | -0.809583 | 3.680668  | -0.185032 |
| O | -1.581906 | 2.500375  | 0.029954  |
| C | -2.680508 | 2.336894  | -0.867662 |
| C | -3.373040 | 1.025396  | -0.575687 |
| O | -2.499897 | -0.051786 | -0.919893 |
| C | -3.129078 | -1.339964 | -0.874188 |
| C | -2.237437 | -2.352083 | -1.555997 |
| O | -1.026280 | -2.494040 | -0.822475 |
| C | -0.102992 | -3.380314 | -1.435597 |
| C | 1.170939  | -3.401143 | -0.621616 |
| O | 1.729720  | -2.082407 | -0.605896 |
| C | 3.097910  | -2.029627 | -0.195976 |
| C | 3.653304  | -0.654770 | -0.489754 |
| O | 3.013741  | 0.300568  | 0.353651  |
| H | 3.370045  | 2.138220  | 1.135383  |
| H | 4.499152  | 1.674637  | -0.148111 |
| H | 2.596839  | 1.910794  | -1.826420 |
| H | 3.025554  | 3.411524  | -0.976525 |
| H | 0.158845  | 3.019128  | -2.020460 |
| H | 0.953652  | 4.374725  | -1.187467 |
| H | -1.417014 | 4.465172  | -0.651247 |
| H | -0.497677 | 4.037311  | 0.799859  |
| H | -2.337106 | 2.345631  | -1.910035 |
| H | -3.398915 | 3.155936  | -0.731331 |
| H | -4.286978 | 0.969607  | -1.180597 |
| H | -3.653119 | 0.964700  | 0.483224  |
| H | -4.084331 | -1.300083 | -1.412326 |
| H | -3.315204 | -1.624396 | 0.165999  |
| H | -2.018685 | -2.027664 | -2.582498 |
| H | -2.768766 | -3.312938 | -1.604276 |
| H | 0.116261  | -3.051099 | -2.460650 |
| H | -0.512996 | -4.399227 | -1.481449 |
| H | 1.877478  | -4.099931 | -1.085549 |
| H | 0.972109  | -3.738319 | 0.403361  |
| H | 3.680943  | -2.770063 | -0.757633 |
| H | 3.187779  | -2.259023 | 0.873706  |
| H | 3.491240  | -0.414765 | -1.548323 |
| H | 4.734299  | -0.661258 | -0.296651 |
| C | 0.141926  | 0.205647  | 1.937862  |
| C | -0.892451 | -0.614046 | 2.683428  |
| O | -1.895171 | -1.062997 | 2.193701  |
| O | -0.553425 | -0.727845 | 3.975496  |
| N | 0.027532  | 0.041135  | 0.469334  |
| H | 1.153545  | -0.049099 | 2.248827  |
| H | -0.031175 | 1.255851  | 2.181438  |
| H | -1.260619 | -1.200632 | 4.443038  |
| H | 0.531923  | -0.795927 | 0.129119  |
| H | 0.458964  | 0.872077  | 0.028655  |
| H | -0.955210 | -0.022231 | 0.139164  |

H<sup>+</sup>G[N]-tt(+00/--0/-00/-00/+00/-00) #206

|   |           |           |           |
|---|-----------|-----------|-----------|
| C | -3.459260 | 1.142211  | -0.813989 |
| C | -3.489868 | -0.307301 | -0.382880 |
| O | -2.326506 | -0.957455 | -0.898833 |
| C | -2.414245 | -2.386765 | -0.943346 |
| C | -1.196885 | -2.920741 | -1.664693 |
| O | -0.046773 | -2.639632 | -0.877416 |
| C | 1.178707  | -3.093855 | -1.428628 |
| C | 2.248593  | -2.909400 | -0.368038 |
| O | 2.414363  | -1.538598 | 0.026932  |
| C | 3.454567  | -0.817727 | -0.641603 |
| C | 3.788054  | 0.417286  | 0.177694  |
| O | 2.709429  | 1.349969  | 0.257709  |
| C | 2.724226  | 2.372639  | -0.734951 |
| C | 1.624708  | 3.363179  | -0.430595 |
| O | 0.350889  | 2.741275  | -0.626119 |
| C | -0.748603 | 3.613301  | -0.342708 |
| C | -2.025071 | 3.028103  | -0.900567 |
| O | -2.310954 | 1.787750  | -0.264285 |
| H | -4.376408 | 1.644114  | -0.477338 |
| H | -3.419781 | 1.190219  | -1.909386 |
| H | -4.395182 | -0.771524 | -0.792876 |
| H | -3.522143 | -0.402439 | 0.709495  |
| H | -3.316059 | -2.682749 | -1.493397 |
| H | -2.462824 | -2.790934 | 0.073370  |
| H | -1.108726 | -2.453057 | -2.654793 |
| H | -1.310436 | -4.004888 | -1.801894 |
| H | 1.418130  | -2.539485 | -2.347914 |
| H | 1.120622  | -4.161578 | -1.684755 |
| H | 3.202421  | -3.316722 | -0.719339 |
| H | 1.953135  | -3.448982 | 0.533980  |
| H | 3.148241  | -0.551292 | -1.661612 |
| H | 4.353041  | -1.443652 | -0.708910 |
| H | 4.681752  | 0.898707  | -0.237336 |
| H | 4.010043  | 0.113703  | 1.203254  |
| H | 2.581071  | 1.952958  | -1.739521 |
| H | 3.685807  | 2.902253  | -0.717178 |
| H | 1.719532  | 4.224238  | -1.104110 |
| H | 1.717898  | 3.717300  | 0.603828  |
| H | -0.580381 | 4.587973  | -0.817288 |
| H | -0.830228 | 3.771994  | 0.740593  |
| H | -1.918992 | 2.875280  | -1.982585 |
| H | -2.840534 | 3.745656  | -0.733234 |
| C | -0.099364 | 0.412332  | 1.888530  |
| C | -0.705495 | -0.717399 | 2.697699  |
| O | -1.337754 | -1.628998 | 2.231603  |
| O | -0.475647 | -0.532140 | 4.004822  |
| N | 0.008604  | 0.059600  | 0.453871  |
| H | 0.885943  | 0.683178  | 2.264302  |
| H | -0.755945 | 1.279656  | 1.982202  |
| H | -0.918471 | -1.237724 | 4.503152  |
| H | 0.799711  | -0.587018 | 0.284798  |
| H | 0.176581  | 0.932730  | -0.074108 |
| H | -0.854792 | -0.377664 | 0.074648  |

H<sup>+</sup>G[N]-tt(+00/--0/--0/-00/+00/-00) #255

|   |           |           |           |
|---|-----------|-----------|-----------|
| C | -2.442018 | -2.357646 | -0.952232 |
| C | -1.226501 | -2.911793 | -1.661349 |
| O | -0.078049 | -2.641495 | -0.867762 |
| C | 1.143449  | -3.122449 | -1.405161 |
| C | 2.209559  | -2.940644 | -0.340306 |
| O | 2.395879  | -1.568064 | 0.037943  |
| C | 3.431180  | -0.863973 | -0.655915 |
| C | 3.799610  | 0.368476  | 0.151709  |
| O | 2.734196  | 1.314730  | 0.250277  |
| C | 2.757603  | 2.350208  | -0.728958 |
| C | 1.668220  | 3.347452  | -0.411045 |
| O | 0.387961  | 2.741450  | -0.614570 |
| C | -0.702173 | 3.625013  | -0.331187 |
| C | -1.982835 | 3.057253  | -0.897263 |
| O | -2.284905 | 1.816516  | -0.269220 |
| C | -3.437144 | 1.186400  | -0.828598 |
| C | -3.490571 | -0.263206 | -0.400382 |
| O | -2.333396 | -0.929822 | -0.909372 |
| H | -2.506781 | -2.758854 | 0.064750  |
| H | -3.342943 | -2.641281 | -1.510265 |
| H | -1.124868 | -2.451440 | -2.653666 |
| H | -1.353795 | -3.995101 | -1.793070 |
| H | 1.397168  | -2.584620 | -2.330386 |
| H | 1.069915  | -4.192449 | -1.647389 |
| H | 3.158978  | -3.368454 | -0.679279 |
| H | 1.899417  | -3.462323 | 0.567247  |
| H | 3.105633  | -0.594879 | -1.669224 |
| H | 4.318740  | -1.503044 | -0.741779 |
| H | 4.689968  | 0.836561  | -0.284889 |
| H | 4.040383  | 0.065407  | 1.173242  |
| H | 2.609270  | 1.944952  | -1.738710 |
| H | 3.724256  | 2.870243  | -0.705420 |
| H | 1.771884  | 4.216105  | -1.073393 |
| H | 1.765203  | 3.687600  | 0.627732  |
| H | -0.520653 | 4.599836  | -0.800596 |
| H | -0.786098 | 3.780148  | 0.752442  |
| H | -1.873715 | 2.909411  | -1.979686 |
| H | -2.791291 | 3.782531  | -0.729393 |
| H | -3.388929 | 1.236012  | -1.923617 |
| H | -4.350277 | 1.699501  | -0.497914 |
| H | -4.399650 | -0.713572 | -0.817537 |
| H | -3.531725 | -0.359978 | 0.691544  |
| C | -0.101668 | 0.414218  | 1.885157  |
| C | -0.726099 | -0.706783 | 2.692631  |
| O | -1.370446 | -1.608957 | 2.224817  |
| O | -0.496887 | -0.525126 | 4.000385  |
| N | 0.009771  | 0.058346  | 0.451436  |
| H | 0.884820  | 0.673466  | 2.266011  |
| H | -0.748555 | 1.289301  | 1.973959  |
| H | -0.951444 | -1.224172 | 4.497395  |
| H | 0.188634  | 0.929175  | -0.076597 |
| H | -0.855971 | -0.371292 | 0.068627  |
| H | 0.795529  | -0.596234 | 0.287227  |

H<sup>+</sup>G[N]-tt(+0+//+0/+00/-00/+00/-00) #386

|   |           |           |           |
|---|-----------|-----------|-----------|
| C | 2.460503  | 2.759216  | -0.047441 |
| C | 1.465943  | 3.102271  | -1.152341 |
| O | 0.141199  | 2.624613  | -0.877687 |
| C | -0.753044 | 3.533057  | -0.223475 |
| C | -2.175780 | 3.081816  | -0.482154 |
| O | -2.383366 | 1.792135  | 0.087479  |
| C | -3.599492 | 1.183159  | -0.340523 |
| C | -3.642193 | -0.262466 | 0.107430  |
| O | -2.571272 | -0.975645 | -0.515459 |
| C | -2.714686 | -2.400512 | -0.528974 |
| C | -1.623450 | -2.983461 | -1.401307 |
| O | -0.364421 | -2.669051 | -0.824515 |
| C | 0.748459  | -3.118571 | -1.589324 |
| C | 2.032663  | -2.718925 | -0.895663 |
| O | 2.152812  | -1.288667 | -0.905922 |
| C | 3.416849  | -0.811340 | -0.437748 |
| C | 3.504523  | 0.681373  | -0.673048 |
| O | 2.569035  | 1.353108  | 0.173903  |
| H | 2.141118  | 3.193743  | 0.903802  |
| H | 3.439021  | 3.191975  | -0.293203 |
| H | 1.759719  | 2.631784  | -2.093343 |
| H | 1.450421  | 4.186676  | -1.311583 |
| H | -0.627805 | 4.541537  | -0.634164 |
| H | -0.548415 | 3.573154  | 0.853867  |
| H | -2.349963 | 3.042298  | -1.564754 |
| H | -2.869774 | 3.812808  | -0.044841 |
| H | -3.668300 | 1.224875  | -1.434924 |
| H | -4.463921 | 1.713489  | 0.082087  |
| H | -4.605349 | -0.689018 | -0.198019 |
| H | -3.568298 | -0.340196 | 1.200249  |
| H | -3.692609 | -2.672393 | -0.944363 |
| H | -2.644805 | -2.799045 | 0.491064  |
| H | -1.694190 | -2.566871 | -2.415319 |
| H | -1.761354 | -4.071972 | -1.464473 |
| H | 0.714166  | -2.684873 | -2.598003 |
| H | 0.729066  | -4.213242 | -1.683562 |
| H | 2.877360  | -3.159342 | -1.439700 |
| H | 2.040041  | -3.082493 | 0.136826  |
| H | 4.226576  | -1.300562 | -0.993694 |
| H | 3.537323  | -1.043156 | 0.627579  |
| H | 3.298549  | 0.894022  | -1.728962 |
| H | 4.523384  | 1.019205  | -0.442461 |
| C | -0.006765 | 0.324914  | 1.798484  |
| C | 0.404309  | -0.887894 | 2.610983  |
| O | 0.998323  | -1.838310 | 2.174883  |
| O | 0.052969  | -0.728401 | 3.896074  |
| N | -0.023391 | 0.038980  | 0.346990  |
| H | 0.735240  | 1.102419  | 1.988821  |
| H | -0.981882 | 0.697712  | 2.105973  |
| H | 0.385028  | -1.484876 | 4.405720  |
| H | 0.001531  | 0.934500  | -0.173080 |
| H | -0.882919 | -0.459130 | 0.056366  |
| H | 0.795508  | -0.519950 | 0.037744  |



H<sup>+</sup>G[N]-tt(-00/+00/-00/+00/-00/+00) #19\_6

|   |           |           |           |
|---|-----------|-----------|-----------|
| N | 0.051156  | 0.018659  | 0.314586  |
| H | -0.523069 | -0.759593 | -0.060412 |
| C | 0.389101  | -0.179047 | 1.747700  |
| H | 0.945411  | 0.032361  | -0.199497 |
| H | -0.434962 | 0.914366  | 0.125853  |
| C | -0.778167 | -0.343466 | 2.703108  |
| H | 1.020556  | -1.058752 | 1.837214  |
| H | 0.973791  | 0.679110  | 2.083795  |
| O | -0.663930 | -0.886808 | 3.765507  |
| O | -1.918184 | 0.224096  | 2.258217  |
| H | -2.587541 | 0.113939  | 2.953423  |
| H | -3.387903 | -2.909419 | -1.141071 |
| C | -2.724478 | -2.045939 | -1.276448 |
| O | -1.501421 | -2.264557 | -0.562051 |
| C | -3.416201 | -0.807123 | -0.758348 |
| H | -2.508956 | -1.934807 | -2.346063 |
| C | -0.812936 | -3.433244 | -1.020960 |
| O | -2.613121 | 0.328765  | -1.049659 |
| H | -4.393778 | -0.723727 | -1.253323 |
| H | -3.585162 | -0.887773 | 0.323372  |
| C | 0.509828  | -3.577276 | -0.304583 |
| H | -0.640513 | -3.357351 | -2.101467 |
| H | -1.426304 | -4.322090 | -0.826025 |
| C | -3.207549 | 1.559935  | -0.657129 |
| O | 1.336839  | -2.470569 | -0.646010 |
| H | 0.974747  | -4.518924 | -0.625891 |
| H | 0.360643  | -3.627695 | 0.783253  |
| C | -2.298546 | 2.696098  | -1.062199 |
| H | -4.176527 | 1.694172  | -1.157607 |
| H | -3.372800 | 1.573379  | 0.427418  |
| C | 2.689791  | -2.597107 | -0.225654 |
| O | -1.069797 | 2.626795  | -0.330009 |
| H | -2.088983 | 2.644097  | -2.137740 |
| H | -2.800809 | 3.648640  | -0.850077 |
| C | 3.473098  | -1.417086 | -0.754121 |
| H | 3.131774  | -3.519736 | -0.625423 |
| H | 2.752613  | -2.640161 | 0.870992  |
| C | -0.171326 | 3.681406  | -0.684417 |
| O | 2.966016  | -0.208813 | -0.182221 |
| H | 3.392366  | -1.372923 | -1.847470 |
| H | 4.530397  | -1.542042 | -0.487105 |
| C | 1.138214  | 3.524728  | 0.053167  |
| H | 0.010922  | 3.663444  | -1.766016 |
| H | -0.616785 | 4.649644  | -0.421702 |
| C | 3.699598  | 0.946353  | -0.595160 |
| O | 1.770827  | 2.326642  | -0.382238 |
| H | 1.768272  | 4.395225  | -0.173532 |
| H | 0.971618  | 3.501635  | 1.139536  |
| C | 3.113743  | 2.175679  | 0.061317  |
| H | 3.651347  | 1.047044  | -1.686711 |
| H | 4.752115  | 0.847643  | -0.299826 |
| H | 3.714833  | 3.048850  | -0.225881 |
| H | 3.151747  | 2.082957  | 1.155955  |

H<sup>+</sup>G[N]-tt(+00/-00/+0/+0/+0/+00/-00) #166

|   |           |           |           |
|---|-----------|-----------|-----------|
| C | 1.132999  | 3.398562  | -0.404081 |
| C | -0.305550 | 3.631665  | -0.817128 |
| O | -1.144828 | 2.649463  | -0.217819 |
| C | -2.473973 | 2.655522  | -0.740797 |
| C | -3.219533 | 1.420132  | -0.282187 |
| O | -2.570486 | 0.263174  | -0.815497 |
| C | -3.340567 | -0.944558 | -0.728943 |
| C | -2.605987 | -2.044951 | -1.463174 |
| O | -1.390714 | -2.340050 | -0.781910 |
| C | -0.590577 | -3.311217 | -1.439883 |
| C | 0.673961  | -3.531563 | -0.638509 |
| O | 1.415016  | -2.306125 | -0.591362 |
| C | 2.745618  | -2.440623 | -0.085587 |
| C | 3.515684  | -1.166102 | -0.357067 |
| O | 2.958164  | -0.104191 | 0.416054  |
| C | 3.550990  | 1.176844  | 0.200845  |
| C | 2.966809  | 1.903098  | -1.007028 |
| O | 1.553276  | 2.119173  | -0.893745 |
| H | 1.237227  | 3.449782  | 0.687318  |
| H | 1.752367  | 4.188515  | -0.844090 |
| H | -0.382267 | 3.570716  | -1.910148 |
| H | -0.607093 | 4.641166  | -0.504535 |
| H | -2.437475 | 2.671120  | -1.837234 |
| H | -3.014126 | 3.548640  | -0.398639 |
| H | -4.248471 | 1.479770  | -0.658094 |
| H | -3.257931 | 1.359497  | 0.812444  |
| H | -4.316040 | -0.790986 | -1.206617 |
| H | -3.490698 | -1.215763 | 0.320420  |
| H | -2.393698 | -1.730807 | -2.493987 |
| H | -3.248664 | -2.935484 | -1.498527 |
| H | -0.337109 | -2.972435 | -2.453745 |
| H | -1.127129 | -4.267184 | -1.520419 |
| H | 1.273718  | -4.309348 | -1.126735 |
| H | 0.432381  | -3.864676 | 0.378640  |
| H | 3.253414  | -3.269500 | -0.594214 |
| H | 2.725699  | -2.656953 | 0.990341  |
| H | 3.469404  | -0.938372 | -1.428741 |
| H | 4.566872  | -1.319842 | -0.079087 |
| H | 4.638176  | 1.084818  | 0.077487  |
| H | 3.370839  | 1.748740  | 1.114704  |
| H | 3.108052  | 1.315557  | -1.917182 |
| H | 3.485712  | 2.858464  | -1.145151 |
| C | 0.172290  | 0.339724  | 1.788592  |
| C | -0.869782 | -0.348794 | 2.647537  |
| O | -1.923384 | -0.770471 | 2.248041  |
| O | -0.471461 | -0.377765 | 3.927991  |
| N | 0.006425  | 0.033210  | 0.349332  |
| H | 1.179568  | 0.066049  | 2.096168  |
| H | 0.045475  | 1.415489  | 1.927484  |
| H | -1.180914 | -0.764175 | 4.466210  |
| H | 0.530694  | 0.737451  | -0.199404 |
| H | -0.983498 | 0.068279  | 0.032597  |
| H | 0.391599  | -0.893083 | 0.097852  |

H<sup>+</sup>G[N]-tt(+0+/+00/-0/-00/+00/-00) #271

|   |           |           |           |
|---|-----------|-----------|-----------|
| C | -1.591365 | 3.120762  | -1.140053 |
| C | -2.681200 | 2.189303  | -0.661802 |
| O | -2.317593 | 0.843335  | -0.983036 |
| C | -3.412943 | -0.075992 | -0.903210 |
| C | -2.948488 | -1.447342 | -1.336982 |
| O | -2.050940 | -1.965357 | -0.357559 |
| C | -1.594411 | -3.292950 | -0.596636 |
| C | -0.248292 | -3.326370 | -1.297356 |
| O | 0.715204  | -2.682291 | -0.455892 |
| C | 2.066330  | -2.855561 | -0.889622 |
| C | 3.000540  | -2.327545 | 0.184786  |
| O | 2.885380  | -0.919824 | 0.391528  |
| C | 3.736127  | -0.126108 | -0.431614 |
| C | 3.545418  | 1.329475  | -0.074322 |
| O | 2.232425  | 1.745659  | -0.460374 |
| C | 1.992267  | 3.141193  | -0.249173 |
| C | 0.733342  | 3.550717  | -0.977347 |
| O | -0.378413 | 2.844325  | -0.442250 |
| H | -1.903071 | 4.159280  | -0.963036 |
| H | -1.437912 | 2.984688  | -2.218486 |
| H | -3.613596 | 2.456533  | -1.174598 |
| H | -2.839807 | 2.283526  | 0.418722  |
| H | -4.214855 | 0.255469  | -1.575126 |
| H | -3.796288 | -0.114196 | 0.121598  |
| H | -2.465498 | -1.383630 | -2.321139 |
| H | -3.825878 | -2.101888 | -1.423947 |
| H | -2.325036 | -3.860781 | -1.185113 |
| H | -1.501848 | -3.772515 | 0.381152  |
| H | -0.287790 | -2.823624 | -2.272886 |
| H | 0.044076  | -4.371361 | -1.462801 |
| H | 2.223251  | -2.343431 | -1.848468 |
| H | 2.271744  | -3.923525 | -1.039652 |
| H | 4.033417  | -2.595680 | -0.068809 |
| H | 2.754174  | -2.799805 | 1.138547  |
| H | 3.510914  | -0.276821 | -1.495223 |
| H | 4.786299  | -0.396758 | -0.258999 |
| H | 4.293087  | 1.929041  | -0.608416 |
| H | 3.688592  | 1.475169  | 1.004050  |
| H | 2.831565  | 3.726377  | -0.644651 |
| H | 1.906275  | 3.348902  | 0.825466  |
| H | 0.837221  | 3.331436  | -2.048430 |
| H | 0.595693  | 4.634886  | -0.860743 |
| C | 0.214300  | 0.176804  | 1.916171  |
| C | -1.108981 | 0.052336  | 2.648793  |
| O | -2.186131 | 0.255660  | 2.154602  |
| O | -0.901476 | -0.258997 | 3.935578  |
| N | 0.052329  | 0.036499  | 0.447528  |
| H | 0.939175  | -0.551014 | 2.272960  |
| H | 0.607799  | 1.172604  | 2.130558  |
| H | -1.755773 | -0.266160 | 4.396558  |
| H | 0.166378  | -0.948138 | 0.152222  |
| H | 0.781894  | 0.600365  | -0.020466 |
| H | -0.874016 | 0.363142  | 0.105905  |

H<sup>+</sup>G[N]-tt(+00/-00/+0+/++0/+00/-00) #5

|   |           |           |           |
|---|-----------|-----------|-----------|
| C | 3.551011  | 1.176260  | 0.200806  |
| C | 2.967070  | 1.902640  | -1.007109 |
| O | 1.553576  | 2.119001  | -0.893926 |
| C | 1.133588  | 3.398393  | -0.404031 |
| C | -0.304966 | 3.631789  | -0.816891 |
| O | -1.144334 | 2.649673  | -0.217569 |
| C | -2.473504 | 2.655916  | -0.740466 |
| C | -3.219206 | 1.420621  | -0.281834 |
| O | -2.570435 | 0.263586  | -0.815305 |
| C | -3.340768 | -0.943997 | -0.728859 |
| C | -2.606404 | -2.044465 | -1.463195 |
| O | -1.391167 | -2.339839 | -0.781977 |
| C | -0.591186 | -3.311065 | -1.440055 |
| C | 0.673354  | -3.531661 | -0.638747 |
| O | 1.414630  | -2.306362 | -0.591613 |
| C | 2.745211  | -2.441091 | -0.085836 |
| C | 3.515451  | -1.166655 | -0.357215 |
| O | 2.957980  | -0.104704 | 0.415885  |
| H | 3.370806  | 1.748143  | 1.114662  |
| H | 4.638202  | 1.084099  | 0.077594  |
| H | 3.108258  | 1.315078  | -1.917259 |
| H | 3.486183  | 2.857900  | -1.145195 |
| H | 1.753041  | 4.188302  | -0.843999 |
| H | 1.237949  | 3.449438  | 0.687365  |
| H | -0.381810 | 3.570938  | -1.909907 |
| H | -0.606311 | 4.641310  | -0.504177 |
| H | -2.437065 | 2.671512  | -1.836905 |
| H | -3.013525 | 3.549100  | -0.398271 |
| H | -4.248185 | 1.480461  | -0.657597 |
| H | -3.257473 | 1.359922  | 0.812799  |
| H | -4.316210 | -0.790177 | -1.206515 |
| H | -3.490947 | -1.215273 | 0.320480  |
| H | -2.394074 | -1.730275 | -2.493986 |
| H | -3.249236 | -2.934883 | -1.498608 |
| H | -0.337695 | -2.972231 | -2.453893 |
| H | -1.127877 | -4.266949 | -1.520658 |
| H | 1.272946  | -4.309540 | -1.127024 |
| H | 0.431770  | -3.864753 | 0.378407  |
| H | 3.252893  | -3.270003 | -0.594519 |
| H | 2.725241  | -2.657501 | 0.990075  |
| H | 3.469294  | -0.938881 | -1.428885 |
| H | 4.566595  | -1.320524 | -0.079147 |
| C | 0.172342  | 0.339750  | 1.788546  |
| C | -0.869701 | -0.348716 | 2.647567  |
| O | -1.923270 | -0.770517 | 2.248115  |
| O | -0.471395 | -0.377485 | 3.928032  |
| N | 0.006497  | 0.033095  | 0.349313  |
| H | 1.179625  | 0.066132  | 2.096162  |
| H | 0.045484  | 1.415526  | 1.927318  |
| H | -1.180828 | -0.763874 | 4.466291  |
| H | -0.983428 | 0.068108  | 0.032572  |
| H | 0.391697  | -0.893205 | 0.097884  |
| H | 0.530759  | 0.737304  | -0.199465 |

H<sup>+</sup>G[N]-tt(+0+/+00/-00/+00/--0/-00) #66

|   |           |           |           |
|---|-----------|-----------|-----------|
| C | -1.193048 | 3.462275  | -0.558651 |
| C | -2.402061 | 2.581962  | -0.777250 |
| O | -2.461864 | 1.613963  | 0.267313  |
| C | -3.623739 | 0.786547  | 0.262342  |
| C | -3.576974 | -0.334630 | -0.761701 |
| O | -2.469820 | -1.192691 | -0.479782 |
| C | -2.385641 | -2.301722 | -1.380984 |
| C | -1.188549 | -3.155645 | -1.034030 |
| O | -0.000140 | -2.413381 | -1.279630 |
| C | 1.188296  | -3.155657 | -1.034195 |
| C | 2.385342  | -2.301712 | -1.381256 |
| O | 2.469628  | -1.192728 | -0.480005 |
| C | 3.576867  | -0.334773 | -0.761913 |
| C | 3.623708  | 0.786423  | 0.262100  |
| O | 2.461871  | 1.613893  | 0.267098  |
| C | 2.402036  | 2.581811  | -0.777535 |
| C | 1.193101  | 3.462220  | -0.558871 |
| O | -0.000006 | 2.685142  | -0.707236 |
| H | -1.225458 | 3.908353  | 0.443124  |
| H | -1.201596 | 4.270558  | -1.300751 |
| H | -2.334220 | 2.098983  | -1.759976 |
| H | -3.302079 | 3.211094  | -0.762788 |
| H | -4.524302 | 1.389907  | 0.090213  |
| H | -3.690192 | 0.361739  | 1.266261  |
| H | -3.490216 | 0.055673  | -1.784186 |
| H | -4.515284 | -0.902035 | -0.699391 |
| H | -2.299761 | -1.936300 | -2.411964 |
| H | -3.295131 | -2.910537 | -1.301309 |
| H | -1.211781 | -4.058919 | -1.659301 |
| H | -1.234351 | -3.463909 | 0.018710  |
| H | 1.211454  | -4.058908 | -1.659502 |
| H | 1.234221  | -3.463954 | 0.018529  |
| H | 2.299323  | -1.936234 | -2.412203 |
| H | 3.294849  | -2.910518 | -1.301722 |
| H | 3.490193  | 0.055500  | -1.784418 |
| H | 4.515125  | -0.902257 | -0.699550 |
| H | 4.524296  | 1.389735  | 0.089932  |
| H | 3.690176  | 0.361637  | 1.266028  |
| H | 2.334054  | 2.098760  | -1.760216 |
| H | 3.302100  | 3.210880  | -0.763213 |
| H | 1.201589  | 4.270436  | -1.301045 |
| H | 1.225661  | 3.908384  | 0.442862  |
| C | 0.000161  | 0.354274  | 1.935551  |
| C | 0.000306  | -0.839349 | 2.868880  |
| O | 0.000686  | -0.721299 | 4.061351  |
| O | -0.000062 | -2.027294 | 2.223326  |
| N | -0.000010 | 0.042564  | 0.483314  |
| H | 0.882316  | 0.957209  | 2.151465  |
| H | -0.881986 | 0.957151  | 2.151682  |
| H | 0.000035  | -2.723956 | 2.899830  |
| H | 0.841487  | -0.479354 | 0.184900  |
| H | -0.000096 | 0.945361  | -0.024700 |
| H | -0.841539 | -0.479411 | 0.185097  |

H<sup>+</sup>G[N]-tt(-00/+00/--0/-0/--0/--0) #1108

|   |           |           |           |
|---|-----------|-----------|-----------|
| C | -1.675760 | -2.832391 | -1.269775 |
| C | -2.762394 | -1.781946 | -1.315337 |
| O | -2.625375 | -0.921791 | -0.176188 |
| C | -3.671435 | 0.041748  | 0.002051  |
| C | -3.290359 | 1.423874  | -0.495569 |
| O | -2.238238 | 1.923624  | 0.329295  |
| C | -1.800686 | 3.245925  | 0.017609  |
| C | -0.785628 | 3.273326  | -1.119037 |
| O | 0.388844  | 2.507368  | -0.817041 |
| C | 1.507558  | 3.243887  | -0.307980 |
| C | 2.749886  | 2.389802  | -0.434818 |
| O | 2.629401  | 1.258353  | 0.424063  |
| C | 3.664743  | 0.284744  | 0.279126  |
| C | 3.437483  | -0.677489 | -0.875519 |
| O | 2.241043  | -1.421025 | -0.644527 |
| C | 1.968209  | -2.383042 | -1.670374 |
| C | 0.681313  | -3.113351 | -1.362681 |
| O | -0.413552 | -2.209055 | -1.482522 |
| H | -1.869910 | -3.577416 | -2.053926 |
| H | -1.689536 | -3.338701 | -0.296246 |
| H | -3.739210 | -2.278635 | -1.282029 |
| H | -2.691654 | -1.204244 | -2.244995 |
| H | -3.877985 | 0.087284  | 1.074060  |
| H | -4.581724 | -0.292078 | -0.506640 |
| H | -4.166948 | 2.082564  | -0.424453 |
| H | -2.980853 | 1.380558  | -1.548018 |
| H | -1.355862 | 3.638463  | 0.935433  |
| H | -2.655088 | 3.886137  | -0.239052 |
| H | -0.514558 | 4.310381  | -1.347027 |
| H | -1.207416 | 2.834864  | -2.026601 |
| H | 1.343101  | 3.527739  | 0.738849  |
| H | 1.648940  | 4.157226  | -0.897379 |
| H | 3.626849  | 2.987133  | -0.150819 |
| H | 2.863974  | 2.078504  | -1.479823 |
| H | 3.687063  | -0.272946 | 1.217956  |
| H | 4.638956  | 0.773686  | 0.154348  |
| H | 4.295893  | -1.360216 | -0.934518 |
| H | 3.365083  | -0.147022 | -1.834161 |
| H | 2.788931  | -3.109769 | -1.717682 |
| H | 1.891781  | -1.876907 | -2.640863 |
| H | 0.714136  | -3.532557 | -0.349252 |
| H | 0.572589  | -3.939041 | -2.079415 |
| C | 0.053698  | 0.121395  | 1.992499  |
| C | -0.010519 | -1.227427 | 2.682342  |
| O | -0.053316 | -2.286112 | 2.111568  |
| O | -0.007190 | -1.072490 | 4.013718  |
| N | 0.001302  | -0.043937 | 0.524856  |
| H | -0.785946 | 0.741524  | 2.309164  |
| H | 0.980257  | 0.631113  | 2.259405  |
| H | -0.043653 | -1.948359 | 4.430170  |
| H | 0.091925  | 0.876851  | 0.060982  |
| H | -0.900806 | -0.459633 | 0.229214  |
| H | 0.772963  | -0.634253 | 0.167169  |

H<sup>+</sup>G[N]-tt(--0/-00/+00/-00/+00/-00) #164

|   |           |           |           |
|---|-----------|-----------|-----------|
| C | 2.245287  | 2.711122  | -0.758285 |
| C | 1.047404  | 3.551477  | -0.372454 |
| O | -0.153767 | 2.799156  | -0.580159 |
| C | -1.343212 | 3.513532  | -0.229637 |
| C | -2.555410 | 2.746264  | -0.707516 |
| O | -2.626808 | 1.488677  | -0.040806 |
| C | -3.727127 | 0.695270  | -0.478801 |
| C | -3.618829 | -0.699779 | 0.097753  |
| O | -2.445984 | -1.328141 | -0.424945 |
| C | -2.396411 | -2.751103 | -0.271868 |
| C | -1.276427 | -3.285652 | -1.137828 |
| O | -0.045386 | -2.738127 | -0.688211 |
| C | 1.058218  | -3.069285 | -1.524543 |
| C | 2.309376  | -2.381553 | -1.022065 |
| O | 2.144850  | -0.958890 | -1.132469 |
| C | 3.343392  | -0.177305 | -1.220233 |
| C | 3.484597  | 0.767965  | -0.032030 |
| O | 2.356669  | 1.625728  | 0.157431  |
| H | 3.145054  | 3.339706  | -0.714689 |
| H | 2.124535  | 2.352629  | -1.787812 |
| H | 1.026580  | 4.454627  | -0.995052 |
| H | 1.123156  | 3.856067  | 0.679227  |
| H | -1.341704 | 4.498123  | -0.713578 |
| H | -1.382812 | 3.664582  | 0.856927  |
| H | -2.492970 | 2.589872  | -1.792486 |
| H | -3.453022 | 3.343834  | -0.496945 |
| H | -3.733095 | 0.635859  | -1.574805 |
| H | -4.674672 | 1.144877  | -0.151662 |
| H | -4.509951 | -1.267323 | -0.196958 |
| H | -3.581481 | -0.669904 | 1.194726  |
| H | -3.344559 | -3.195195 | -0.597989 |
| H | -2.233472 | -3.014733 | 0.780991  |
| H | -1.455470 | -3.007072 | -2.185081 |
| H | -1.262711 | -4.382549 | -1.069880 |
| H | 0.850974  | -2.757731 | -2.557171 |
| H | 1.228945  | -4.155169 | -1.517971 |
| H | 3.150119  | -2.707531 | -1.644281 |
| H | 2.505032  | -2.651313 | 0.020217  |
| H | 3.305739  | 0.374158  | -2.164862 |
| H | 4.226258  | -0.824220 | -1.251876 |
| H | 4.400919  | 1.362200  | -0.151751 |
| H | 3.565689  | 0.192681  | 0.891683  |
| C | -0.069305 | 0.315826  | 1.812026  |
| C | 0.668715  | -0.771880 | 2.568861  |
| O | 1.521658  | -1.477013 | 2.097433  |
| O | 0.276445  | -0.798649 | 3.851050  |
| N | -0.059827 | 0.082746  | 0.349565  |
| H | 0.453234  | 1.253279  | 2.012860  |
| H | -1.095452 | 0.416311  | 2.159309  |
| H | 0.814610  | -1.450689 | 4.328138  |
| H | -0.166029 | 0.996915  | -0.121458 |
| H | -0.843392 | -0.524279 | 0.050469  |
| H | 0.825727  | -0.338524 | 0.009942  |

H<sup>+</sup>G[N]-tt(+00/-00/+00/-0/-/--0/-00) #265

|   |           |           |           |
|---|-----------|-----------|-----------|
| C | 2.699992  | 2.155319  | -0.972709 |
| C | 1.726637  | 3.195520  | -0.464010 |
| O | 0.388957  | 2.704643  | -0.618711 |
| C | -0.620998 | 3.656353  | -0.269649 |
| C | -1.969528 | 3.162282  | -0.743499 |
| O | -2.316311 | 1.963849  | -0.055291 |
| C | -3.551219 | 1.408752  | -0.500211 |
| C | -3.772099 | 0.064184  | 0.156168  |
| O | -2.765317 | -0.846835 | -0.293838 |
| C | -2.986937 | -2.210790 | 0.082573  |
| C | -2.034532 | -3.099188 | -0.687314 |
| O | -0.695061 | -2.780369 | -0.333750 |
| C | 0.270723  | -3.463907 | -1.131493 |
| C | 1.649376  | -2.894570 | -0.870269 |
| O | 1.655128  | -1.518697 | -1.273510 |
| C | 2.924011  | -0.941031 | -1.605985 |
| C | 3.488159  | -0.070472 | -0.487635 |
| O | 2.622519  | 1.011260  | -0.130804 |
| H | 3.713398  | 2.579030  | -0.950017 |
| H | 2.455335  | 1.903702  | -2.012376 |
| H | 1.848607  | 4.117606  | -1.045365 |
| H | 1.925991  | 3.418445  | 0.591741  |
| H | -0.411324 | 4.615041  | -0.759888 |
| H | -0.626268 | 3.820718  | 0.815756  |
| H | -1.937150 | 2.976995  | -1.825200 |
| H | -2.716941 | 3.944074  | -0.549942 |
| H | -3.536112 | 1.286193  | -1.591047 |
| H | -4.385369 | 2.073996  | -0.238498 |
| H | -4.763688 | -0.307845 | -0.129367 |
| H | -3.742323 | 0.157445  | 1.249882  |
| H | -4.015873 | -2.501087 | -0.162251 |
| H | -2.844185 | -2.333320 | 1.164391  |
| H | -2.184939 | -2.951294 | -1.764932 |
| H | -2.260047 | -4.148314 | -0.449588 |
| H | 0.021714  | -3.345468 | -2.193831 |
| H | 0.272994  | -4.536123 | -0.891257 |
| H | 2.373833  | -3.463234 | -1.464567 |
| H | 1.913712  | -2.978731 | 0.188630  |
| H | 2.762135  | -0.352428 | -2.513164 |
| H | 3.649319  | -1.726147 | -1.848071 |
| H | 4.471877  | 0.312442  | -0.791434 |
| H | 3.612317  | -0.656912 | 0.422608  |
| C | -0.215977 | 0.120013  | 1.821760  |
| C | 0.995005  | -0.472083 | 2.517824  |
| O | 1.798871  | -1.204138 | 2.004026  |
| O | 1.012014  | -0.099330 | 3.804728  |
| N | -0.117344 | 0.045063  | 0.344018  |
| H | -0.364085 | 1.153047  | 2.130070  |
| H | -1.088374 | -0.446066 | 2.153185  |
| H | 1.760375  | -0.531909 | 4.246202  |
| H | 0.109354  | 0.975704  | -0.048311 |
| H | -1.024224 | -0.262657 | -0.046459 |
| H | 0.609260  | -0.613708 | 0.008886  |

H<sup>+</sup>G[N]-tt(-00/+0+/-00/-0/-00) #2811

|   |           |           |           |
|---|-----------|-----------|-----------|
| C | -1.095996 | 3.286285  | -0.950376 |
| C | -2.396397 | 2.884328  | -0.291489 |
| O | -2.402285 | 1.475255  | -0.022333 |
| C | -3.705664 | 0.886460  | -0.050765 |
| C | -3.690112 | -0.447769 | 0.683869  |
| O | -2.649575 | -1.333191 | 0.287388  |
| C | -2.766674 | -1.858806 | -1.031542 |
| C | -1.686436 | -2.897221 | -1.247727 |
| O | -0.395259 | -2.301751 | -1.085569 |
| C | 0.628262  | -2.867691 | -1.914400 |
| C | 1.988739  | -2.443472 | -1.410219 |
| O | 2.083799  | -1.023658 | -1.440276 |
| C | 3.351246  | -0.547753 | -1.000611 |
| C | 3.319635  | 0.961532  | -0.947426 |
| O | 2.448738  | 1.383436  | 0.112588  |
| C | 2.346159  | 2.803821  | 0.267641  |
| C | 1.248509  | 3.409592  | -0.586126 |
| O | -0.007413 | 2.939406  | -0.105461 |
| H | -1.119722 | 4.370674  | -1.127881 |
| H | -0.990766 | 2.783229  | -1.921944 |
| H | -3.216375 | 3.141144  | -0.971798 |
| H | -2.540647 | 3.429508  | 0.648262  |
| H | -4.430837 | 1.535325  | 0.456088  |
| H | -4.028431 | 0.776780  | -1.093534 |
| H | -4.672570 | -0.924556 | 0.562090  |
| H | -3.532284 | -0.276552 | 1.750880  |
| H | -3.747947 | -2.334499 | -1.167335 |
| H | -2.660377 | -1.060493 | -1.776387 |
| H | -1.794190 | -3.292750 | -2.264149 |
| H | -1.796488 | -3.725582 | -0.538491 |
| H | 0.575505  | -3.962689 | -1.882550 |
| H | 0.476497  | -2.537912 | -2.949172 |
| H | 2.752212  | -2.894417 | -2.060205 |
| H | 2.144813  | -2.804741 | -0.387063 |
| H | 3.585329  | -0.953649 | -0.009103 |
| H | 4.139355  | -0.858481 | -1.700866 |
| H | 4.331760  | 1.336161  | -0.752365 |
| H | 2.975761  | 1.361055  | -1.908630 |
| H | 3.305661  | 3.277429  | 0.032137  |
| H | 2.129885  | 2.984624  | 1.322967  |
| H | 1.377243  | 3.132496  | -1.641353 |
| H | 1.296089  | 4.505360  | -0.516449 |
| C | -0.123484 | -0.290605 | 2.072388  |
| C | 0.990764  | -1.177687 | 2.591508  |
| O | 1.829562  | -1.701540 | 1.906246  |
| O | 0.898484  | -1.303307 | 3.922133  |
| N | 0.007361  | -0.048817 | 0.619006  |
| H | -0.113944 | 0.662981  | 2.601652  |
| H | -1.080865 | -0.777207 | 2.260528  |
| H | 1.608720  | -1.887573 | 4.232267  |
| H | -0.770121 | 0.559844  | 0.312127  |
| H | 0.904020  | 0.418955  | 0.382990  |
| H | -0.058517 | -0.926031 | 0.068186  |

H<sup>+</sup>G[N]-tt(-0/-00/+00/-00/+0+/-00) #127

|   |           |           |           |
|---|-----------|-----------|-----------|
| C | -0.032194 | 3.647875  | -0.282803 |
| C | -1.460100 | 3.427413  | -0.727402 |
| O | -1.981847 | 2.249175  | -0.119761 |
| C | -3.256248 | 1.889430  | -0.643019 |
| C | -3.694492 | 0.564913  | -0.063648 |
| O | -2.781028 | -0.459300 | -0.469499 |
| C | -3.291443 | -1.783327 | -0.283331 |
| C | -2.277252 | -2.787057 | -0.780064 |
| O | -1.136048 | -2.747865 | 0.071069  |
| C | -0.116272 | -3.694813 | -0.254220 |
| C | 0.872907  | -3.182991 | -1.287852 |
| O | 1.566526  | -2.065650 | -0.735195 |
| C | 2.687333  | -1.622039 | -1.504729 |
| C | 3.471140  | -0.609070 | -0.686394 |
| O | 2.740019  | 0.584918  | -0.418194 |
| C | 2.883589  | 1.631580  | -1.366716 |
| C | 2.168246  | 2.846454  | -0.819796 |
| O | 0.771485  | 2.548241  | -0.718059 |
| H | 0.030564  | 3.753736  | 0.807972  |
| H | 0.328508  | 4.579329  | -0.735551 |
| H | -1.490000 | 3.326342  | -1.820124 |
| H | -2.062652 | 4.301893  | -0.445003 |
| H | -3.201093 | 1.811711  | -1.736784 |
| H | -4.005349 | 2.652269  | -0.389114 |
| H | -4.699219 | 0.337962  | -0.440718 |
| H | -3.743119 | 0.612945  | 1.031958  |
| H | -4.221922 | -1.901417 | -0.852526 |
| H | -3.508284 | -1.960963 | 0.777835  |
| H | -2.006661 | -2.555459 | -1.818366 |
| H | -2.731586 | -3.786675 | -0.757416 |
| H | -0.562910 | -4.632045 | -0.608275 |
| H | 0.414806  | -3.899882 | 0.677412  |
| H | 0.372500  | -2.895574 | -2.222750 |
| H | 1.584074  | -3.987010 | -1.519453 |
| H | 2.344908  | -1.197520 | -2.458423 |
| H | 3.341304  | -2.475209 | -1.728325 |
| H | 4.411197  | -0.378031 | -1.202558 |
| H | 3.704468  | -1.041659 | 0.287806  |
| H | 2.456897  | 1.353647  | -2.339971 |
| H | 3.943753  | 1.879719  | -1.512201 |
| H | 2.316549  | 3.696321  | -1.497389 |
| H | 2.572371  | 3.105787  | 0.166501  |
| C | -0.347180 | 0.066352  | 1.923124  |
| C | 0.899106  | -0.158158 | 2.760335  |
| O | 1.911265  | -0.667719 | 2.363396  |
| O | 0.686004  | 0.254374  | 4.020248  |
| N | -0.060745 | 0.001884  | 0.470366  |
| H | -0.811608 | 1.023113  | 2.155486  |
| H | -1.056392 | -0.727333 | 2.167598  |
| H | 1.470064  | 0.044453  | 4.552514  |
| H | 0.360659  | 0.878157  | 0.114243  |
| H | -0.957648 | -0.142959 | -0.023856 |
| H | 0.577173  | -0.777612 | 0.223975  |

H<sup>+</sup>G[N]-tt(-00/+00/--0/-0/-0/-0) #1145

|   |           |           |           |
|---|-----------|-----------|-----------|
| C | -2.271548 | 2.790680  | 0.308327  |
| C | -1.396544 | 3.268764  | -0.845064 |
| O | -0.072963 | 2.738045  | -0.777258 |
| C | 0.886998  | 3.580239  | -0.150762 |
| C | 2.254118  | 2.959365  | -0.321065 |
| O | 2.304038  | 1.721276  | 0.398620  |
| C | 3.585261  | 1.071438  | 0.386018  |
| C | 3.593579  | -0.163134 | -0.494470 |
| O | 2.736106  | -1.135789 | 0.098217  |
| C | 2.712895  | -2.407987 | -0.549803 |
| C | 1.709584  | -2.494089 | -1.686428 |
| O | 0.393693  | -2.297701 | -1.167049 |
| C | -0.637158 | -2.596047 | -2.119023 |
| C | -1.992431 | -2.354855 | -1.496327 |
| O | -2.157664 | -0.956676 | -1.291640 |
| C | -3.390027 | -0.613952 | -0.668309 |
| C | -3.469511 | 0.891366  | -0.565106 |
| O | -2.440349 | 1.367867  | 0.315587  |
| H | -3.250051 | 3.284663  | 0.264136  |
| H | -1.816989 | 3.045840  | 1.268832  |
| H | -1.375423 | 4.365757  | -0.853872 |
| H | -1.808912 | 2.939568  | -1.801439 |
| H | 0.666711  | 3.711273  | 0.917655  |
| H | 0.893853  | 4.571589  | -0.623131 |
| H | 3.010496  | 3.647043  | 0.075895  |
| H | 2.453563  | 2.789223  | -1.385839 |
| H | 3.814454  | 0.785934  | 1.415967  |
| H | 4.357646  | 1.767882  | 0.045708  |
| H | 4.619508  | -0.552160 | -0.552586 |
| H | 3.263430  | 0.088815  | -1.510986 |
| H | 2.445797  | -3.133872 | 0.221434  |
| H | 3.710531  | -2.664709 | -0.926894 |
| H | 1.785890  | -3.491325 | -2.139886 |
| H | 1.916602  | -1.752889 | -2.469995 |
| H | -0.558982 | -3.648370 | -2.419001 |
| H | -0.514315 | -1.966881 | -3.009246 |
| H | -2.074158 | -2.891597 | -0.543716 |
| H | -2.764406 | -2.734685 | -2.180254 |
| H | -3.454027 | -1.074824 | 0.324292  |
| H | -4.238587 | -0.965407 | -1.272033 |
| H | -4.449185 | 1.181182  | -0.166269 |
| H | -3.350442 | 1.330516  | -1.561133 |
| C | 0.276209  | -0.427270 | 2.046615  |
| C | -0.723238 | -1.450714 | 2.545697  |
| O | -1.603172 | -1.935448 | 1.883256  |
| O | -0.481917 | -1.742097 | 3.831008  |
| N | 0.022101  | -0.055835 | 0.636182  |
| H | 0.227394  | 0.464751  | 2.672839  |
| H | 1.285738  | -0.833650 | 2.119169  |
| H | -1.127975 | -2.401884 | 4.129736  |
| H | -0.910856 | 0.378470  | 0.491815  |
| H | 0.092826  | -0.874217 | 0.002363  |
| H | 0.743847  | 0.626170  | 0.345444  |

H<sup>+</sup>G[N]-tt(-00/+0+/-0+/-0+/-0+/-0) #1335

|   |           |           |           |
|---|-----------|-----------|-----------|
| C | 2.392309  | -1.953249 | -1.590709 |
| C | 1.182884  | -2.857279 | -1.600781 |
| O | -0.000050 | -2.065144 | -1.618643 |
| C | -1.182982 | -2.857282 | -1.600667 |
| C | -2.392411 | -1.953258 | -1.590661 |
| O | -2.447627 | -1.254851 | -0.341407 |
| C | -3.646229 | -0.502587 | -0.123166 |
| C | -3.511336 | 0.950006  | -0.536224 |
| O | -2.567575 | 1.569335  | 0.334588  |
| C | -2.360762 | 2.961372  | 0.103734  |
| C | -1.202281 | 3.237142  | -0.838176 |
| O | 0.000091  | 2.758009  | -0.228601 |
| C | 1.202504  | 3.237029  | -0.838185 |
| C | 2.360956  | 2.961208  | 0.103744  |
| O | 2.567664  | 1.569159  | 0.334633  |
| C | 3.511458  | 0.949763  | -0.536095 |
| C | 3.646214  | -0.502841 | -0.123028 |
| O | 2.447583  | -1.255028 | -0.341354 |
| H | 2.343286  | -1.246334 | -2.428249 |
| H | 3.293317  | -2.568021 | -1.704297 |
| H | 1.192249  | -3.501417 | -0.712497 |
| H | 1.226910  | -3.494374 | -2.495278 |
| H | -1.192314 | -3.501328 | -0.712316 |
| H | -1.227035 | -3.494468 | -2.495098 |
| H | -3.293419 | -2.568059 | -1.704108 |
| H | -2.343443 | -1.246462 | -2.428305 |
| H | -3.856363 | -0.555332 | 0.947537  |
| H | -4.482988 | -0.964685 | -0.658044 |
| H | -4.489711 | 1.440974  | -0.442080 |
| H | -3.190789 | 1.028598  | -1.583948 |
| H | -2.143895 | 3.408325  | 1.076752  |
| H | -3.271079 | 3.429225  | -0.289931 |
| H | -1.129337 | 4.320132  | -1.000481 |
| H | -1.348314 | 2.756396  | -1.814719 |
| H | 1.129638  | 4.320018  | -1.000538 |
| H | 1.348511  | 2.756231  | -1.814706 |
| H | 2.144111  | 3.408204  | 1.076748  |
| H | 3.271310  | 3.428985  | -0.289925 |
| H | 4.489861  | 1.440660  | -0.441864 |
| H | 3.191011  | 1.028386  | -1.583848 |
| H | 3.856255  | -0.555600 | 0.947693  |
| H | 4.482985  | -0.965000 | -0.657836 |
| C | -0.000035 | -0.011794 | 2.122126  |
| C | -0.000117 | -1.416665 | 2.695354  |
| O | -0.000143 | -2.422977 | 2.037085  |
| O | -0.000122 | -1.371952 | 4.035226  |
| N | -0.000017 | -0.054139 | 0.642786  |
| H | -0.884233 | 0.528638  | 2.462663  |
| H | 0.884207  | 0.528549  | 2.462692  |
| H | -0.000162 | -2.279977 | 4.377767  |
| H | -0.840626 | -0.539543 | 0.276751  |
| H | 0.840570  | -0.539590 | 0.276772  |
| H | 0.000015  | 0.914049  | 0.277383  |

H<sup>+</sup>G[N]-tt(+00/+00/--0/-00/++0/+0+) #1197

|   |           |           |           |
|---|-----------|-----------|-----------|
| C | -2.968412 | -1.667049 | -0.686913 |
| C | -3.618170 | -0.307363 | -0.540909 |
| O | -2.922243 | 0.442104  | 0.456163  |
| C | -3.242811 | 1.833905  | 0.490291  |
| C | -2.396409 | 2.665894  | -0.458828 |
| O | -1.034336 | 2.656437  | -0.017095 |
| C | -0.157339 | 3.367799  | -0.897533 |
| C | 1.206541  | 3.521424  | -0.253512 |
| O | 1.716530  | 2.238924  | 0.107279  |
| C | 3.117545  | 2.054825  | -0.070717 |
| C | 3.523009  | 0.789305  | 0.669831  |
| O | 2.761406  | -0.357897 | 0.278704  |
| C | 3.282908  | -1.091050 | -0.838576 |
| C | 2.267076  | -2.123831 | -1.275805 |
| O | 1.149582  | -1.439680 | -1.836227 |
| C | 0.192857  | -2.257311 | -2.506389 |
| C | -0.974264 | -2.672042 | -1.624038 |
| O | -1.643223 | -1.479700 | -1.186741 |
| H | -3.555392 | -2.265456 | -1.394345 |
| H | -2.946546 | -2.195687 | 0.274781  |
| H | -4.668833 | -0.435108 | -0.249151 |
| H | -3.585578 | 0.209149  | -1.507425 |
| H | -3.070243 | 2.165971  | 1.516767  |
| H | -4.303386 | 1.991725  | 0.260721  |
| H | -2.772720 | 3.697277  | -0.461977 |
| H | -2.457477 | 2.279376  | -1.484683 |
| H | -0.564393 | 4.365802  | -1.104462 |
| H | -0.073191 | 2.823085  | -1.846949 |
| H | 1.142104  | 4.151169  | 0.641569  |
| H | 1.865574  | 4.016975  | -0.976124 |
| H | 3.684015  | 2.894809  | 0.353327  |
| H | 3.352089  | 1.992311  | -1.141537 |
| H | 3.338818  | 0.920354  | 1.738561  |
| H | 4.593971  | 0.602903  | 0.531262  |
| H | 4.211494  | -1.592316 | -0.539586 |
| H | 3.496406  | -0.415015 | -1.673768 |
| H | 1.964870  | -2.743297 | -0.422329 |
| H | 2.734833  | -2.771337 | -2.029463 |
| H | 0.669414  | -3.155447 | -2.918489 |
| H | -0.186563 | -1.660151 | -3.339022 |
| H | -0.646987 | -3.251860 | -0.754405 |
| H | -1.662558 | -3.285246 | -2.219330 |
| C | -0.267487 | -0.244883 | 2.080844  |
| C | -0.031597 | -1.701095 | 2.427021  |
| O | 0.118202  | -2.580597 | 1.616956  |
| O | -0.039110 | -1.877017 | 3.753792  |
| N | -0.034492 | 0.001911  | 0.642993  |
| H | -1.302581 | 0.007421  | 2.316899  |
| H | 0.386511  | 0.394545  | 2.674031  |
| H | 0.081720  | -2.820592 | 3.946717  |
| H | 0.963277  | -0.132054 | 0.392082  |
| H | -0.290863 | 0.976532  | 0.409746  |
| H | -0.611496 | -0.610977 | 0.034382  |

H<sup>+</sup>G[N]-tt(-0/-00/+0+/+00/+00/--0) #492

|   |           |           |           |
|---|-----------|-----------|-----------|
| C | 3.592844  | 0.986587  | 0.542300  |
| C | 3.023651  | 2.125519  | -0.292252 |
| O | 1.619420  | 2.253825  | -0.039703 |
| C | 1.063823  | 3.549007  | -0.312576 |
| C | -0.350157 | 3.416934  | -0.838740 |
| O | -1.148421 | 2.712506  | 0.104650  |
| C | -2.527527 | 2.655898  | -0.251963 |
| C | -3.218095 | 1.646516  | 0.647297  |
| O | -2.768012 | 0.305457  | 0.407102  |
| C | -3.520617 | -0.410650 | -0.584525 |
| C | -2.742484 | -1.627431 | -1.035763 |
| O | -1.587257 | -1.174702 | -1.737501 |
| C | -0.868660 | -2.167080 | -2.465031 |
| C | 0.256535  | -2.813608 | -1.670984 |
| O | 1.176562  | -1.782390 | -1.283820 |
| C | 2.490856  | -2.228560 | -0.945391 |
| C | 3.382518  | -1.015191 | -0.787409 |
| O | 2.938441  | -0.263660 | 0.341607  |
| H | 3.468279  | 1.221049  | 1.602239  |
| H | 4.668729  | 0.900162  | 0.342452  |
| H | 3.184946  | 1.967380  | -1.365596 |
| H | 3.546936  | 3.044685  | -0.002348 |
| H | 1.661881  | 4.064533  | -1.071735 |
| H | 1.080962  | 4.143417  | 0.607560  |
| H | -0.350598 | 2.883018  | -1.799184 |
| H | -0.749184 | 4.426956  | -1.007943 |
| H | -2.633118 | 2.367635  | -1.306529 |
| H | -2.994517 | 3.641898  | -0.120365 |
| H | -4.303575 | 1.709497  | 0.516718  |
| H | -2.991116 | 1.868388  | 1.692464  |
| H | -3.713988 | 0.233142  | -1.449379 |
| H | -4.479198 | -0.723183 | -0.153329 |
| H | -3.385636 | -2.220017 | -1.700233 |
| H | -2.464965 | -2.246977 | -0.174882 |
| H | -0.441933 | -1.654295 | -3.330131 |
| H | -1.546801 | -2.948950 | -2.829793 |
| H | 0.764266  | -3.540955 | -2.316800 |
| H | -0.112304 | -3.332647 | -0.779573 |
| H | 2.889137  | -2.860752 | -1.748445 |
| H | 2.471941  | -2.816903 | -0.019004 |
| H | 3.335696  | -0.411845 | -1.701656 |
| H | 4.419353  | -1.343639 | -0.636629 |
| C | 0.267308  | -0.320634 | 2.069114  |
| C | -0.282601 | -1.685127 | 2.431963  |
| O | -0.668663 | -2.501859 | 1.634270  |
| O | -0.253401 | -1.866367 | 3.757498  |
| N | 0.037721  | -0.014407 | 0.642020  |
| H | 1.341390  | -0.319500 | 2.259959  |
| H | -0.194615 | 0.448232  | 2.688783  |
| H | -0.579492 | -2.757762 | 3.960520  |
| H | 0.518521  | 0.868352  | 0.392181  |
| H | -0.973739 | 0.096371  | 0.437910  |
| H | 0.424970  | -0.741995 | 0.009590  |

H<sup>+</sup>G[N]-tt(-0/-00/+0+/-00/-0/-0) #44

|   |           |           |           |
|---|-----------|-----------|-----------|
| C | 2.962546  | 2.317145  | 0.196482  |
| C | 1.940661  | 2.891218  | -0.771564 |
| O | 0.634837  | 2.735399  | -0.204426 |
| C | -0.414987 | 3.381001  | -0.934237 |
| C | -1.647283 | 3.436852  | -0.047582 |
| O | -2.116091 | 2.139849  | 0.322685  |
| C | -3.239563 | 1.654542  | -0.410700 |
| C | -3.679933 | 0.345498  | 0.216918  |
| O | -2.693590 | -0.685529 | 0.059323  |
| C | -3.024066 | -1.691929 | -0.909218 |
| C | -1.835521 | -2.601292 | -1.124077 |
| O | -0.810994 | -1.849915 | -1.769087 |
| C | 0.284431  | -2.607075 | -2.276339 |
| C | 1.439788  | -2.730570 | -1.295689 |
| O | 1.898942  | -1.405829 | -0.990177 |
| C | 3.224187  | -1.316050 | -0.465872 |
| C | 3.657556  | 0.132586  | -0.521979 |
| O | 2.839121  | 0.903257  | 0.358786  |
| H | 2.810964  | 2.760599  | 1.183460  |
| H | 3.971489  | 2.582038  | -0.140360 |
| H | 1.989547  | 2.393003  | -1.748637 |
| H | 2.150414  | 3.958240  | -0.919793 |
| H | -0.611877 | 2.837741  | -1.867960 |
| H | -0.114781 | 4.405191  | -1.189394 |
| H | -2.434134 | 4.006193  | -0.555329 |
| H | -1.396397 | 3.956653  | 0.880478  |
| H | -2.985603 | 1.508650  | -1.469431 |
| H | -4.068426 | 2.372756  | -0.350015 |
| H | -4.630498 | 0.028501  | -0.222764 |
| H | -3.832594 | 0.489170  | 1.289598  |
| H | -3.299948 | -1.221827 | -1.860044 |
| H | -3.873064 | -2.282271 | -0.543973 |
| H | -2.153867 | -3.436919 | -1.761817 |
| H | -1.487008 | -3.006385 | -0.166381 |
| H | 0.630122  | -2.077936 | -3.167433 |
| H | -0.042856 | -3.610015 | -2.578041 |
| H | 2.245579  | -3.301642 | -1.773602 |
| H | 1.145192  | -3.242218 | -0.373098 |
| H | 3.911103  | -1.914396 | -1.076668 |
| H | 3.259595  | -1.695796 | 0.563358  |
| H | 3.562310  | 0.493525  | -1.553162 |
| H | 4.710354  | 0.210362  | -0.220374 |
| C | 0.196154  | -0.001582 | 2.053145  |
| C | 0.132348  | -1.427983 | 2.558904  |
| O | 0.106077  | -2.403968 | 1.851992  |
| O | 0.132456  | -1.453840 | 3.896733  |
| N | 0.004610  | 0.051914  | 0.588024  |
| H | 1.175665  | 0.415129  | 2.293959  |
| H | -0.566433 | 0.607270  | 2.539364  |
| H | 0.117762  | -2.377870 | 4.193515  |
| H | 0.681047  | -0.545301 | 0.073348  |
| H | 0.157931  | 1.025183  | 0.267362  |
| H | -0.957841 | -0.230586 | 0.321876  |

H<sup>+</sup>G[N]-tt(-00/+00/-+/-+00/-0/-0) #724

|   |           |           |           |
|---|-----------|-----------|-----------|
| C | -3.661770 | 1.014516  | 0.191627  |
| C | -2.916178 | 1.976580  | -0.715445 |
| O | -1.670665 | 2.336191  | -0.109414 |
| C | -1.035044 | 3.448083  | -0.751715 |
| C | 0.309948  | 3.701173  | -0.109202 |
| O | 1.150642  | 2.587765  | -0.380091 |
| C | 2.479194  | 2.712258  | 0.113002  |
| C | 3.285799  | 1.536726  | -0.392974 |
| O | 2.748713  | 0.327996  | 0.152489  |
| C | 3.340295  | -0.881814 | -0.350653 |
| C | 2.808299  | -1.267122 | -1.727815 |
| O | 1.394740  | -1.448146 | -1.743079 |
| C | 0.941974  | -2.782688 | -1.521149 |
| C | -0.534274 | -2.845039 | -1.842672 |
| O | -1.284609 | -2.124175 | -0.855518 |
| C | -2.659076 | -1.958086 | -1.206315 |
| C | -3.421722 | -1.423905 | -0.007201 |
| O | -2.909781 | -0.171672 | 0.450711  |
| H | -4.625915 | 0.773249  | -0.268985 |
| H | -3.856997 | 1.499942  | 1.152965  |
| H | -3.534376 | 2.873420  | -0.853926 |
| H | -2.730553 | 1.531596  | -1.701936 |
| H | -1.663516 | 4.341049  | -0.646835 |
| H | -0.900999 | 3.236013  | -1.819645 |
| H | 0.195596  | 3.847135  | 0.974114  |
| H | 0.736619  | 4.620162  | -0.533852 |
| H | 2.481579  | 2.738367  | 1.211747  |
| H | 2.941903  | 3.639553  | -0.251106 |
| H | 4.331256  | 1.648653  | -0.079547 |
| H | 3.246194  | 1.518050  | -1.487098 |
| H | 3.096505  | -1.647733 | 0.385947  |
| H | 4.431362  | -0.773702 | -0.390427 |
| H | 3.322978  | -2.176404 | -2.064375 |
| H | 3.019953  | -0.483698 | -2.459489 |
| H | 1.119120  | -3.094540 | -0.485087 |
| H | 1.467334  | -3.476219 | -2.191224 |
| H | -0.862887 | -3.891752 | -1.852675 |
| H | -0.711766 | -2.409606 | -2.833373 |
| H | -3.092032 | -2.926346 | -1.491909 |
| H | -2.742243 | -1.279546 | -2.065986 |
| H | -3.329870 | -2.129904 | 0.823204  |
| H | -4.483445 | -1.342242 | -0.264403 |
| C | -0.210330 | -0.104762 | 2.073044  |
| C | 0.507352  | -1.329597 | 2.602507  |
| O | 1.126674  | -2.109734 | 1.925274  |
| O | 0.352317  | -1.423611 | 3.929111  |
| N | -0.034518 | 0.026343  | 0.610468  |
| H | -1.276286 | -0.175299 | 2.291326  |
| H | 0.179881  | 0.785181  | 2.569155  |
| H | 0.816948  | -2.215294 | 4.244301  |
| H | -0.426682 | -0.787150 | 0.101687  |
| H | 0.965855  | 0.134399  | 0.349263  |
| H | -0.544936 | 0.863406  | 0.278807  |



H<sup>+</sup>G[N]-tt(+0+/+00/-0/-0/-0/-00) #10857

|   |           |           |           |
|---|-----------|-----------|-----------|
| C | -1.688204 | -2.599202 | -1.592488 |
| C | -2.815682 | -1.692585 | -1.149719 |
| O | -2.341298 | -0.341947 | -1.075347 |
| C | -3.359256 | 0.601626  | -0.727379 |
| C | -2.833282 | 2.002800  | -0.947123 |
| O | -1.770566 | 2.264627  | -0.027631 |
| C | -1.054384 | 3.472930  | -0.279924 |
| C | 0.055254  | 3.283547  | -1.307779 |
| O | 1.032850  | 2.320716  | -0.883790 |
| C | 2.231503  | 2.852155  | -0.306346 |
| C | 3.283293  | 1.765069  | -0.290646 |
| O | 2.853941  | 0.715105  | 0.572770  |
| C | 3.688392  | -0.444075 | 0.558931  |
| C | 3.326992  | -1.433547 | -0.536077 |
| O | 2.030495  | -1.974343 | -0.274136 |
| C | 1.606563  | -2.934399 | -1.248332 |
| C | 0.339356  | -3.605045 | -0.748920 |
| O | -0.722309 | -2.676779 | -0.547588 |
| H | -2.104056 | -3.594857 | -1.795727 |
| H | -1.239899 | -2.215522 | -2.518794 |
| H | -3.629582 | -1.751707 | -1.883305 |
| H | -3.189421 | -2.009809 | -0.170372 |
| H | -4.236910 | 0.455224  | -1.369423 |
| H | -3.662076 | 0.456134  | 0.316210  |
| H | -3.648471 | 2.720680  | -0.786993 |
| H | -2.485513 | 2.099090  | -1.982589 |
| H | -1.734406 | 4.266037  | -0.617364 |
| H | -0.635219 | 3.786670  | 0.679918  |
| H | 0.537556  | 4.245566  | -1.513678 |
| H | -0.351957 | 2.907281  | -2.249097 |
| H | 2.043964  | 3.217440  | 0.710976  |
| H | 2.598455  | 3.687449  | -0.913811 |
| H | 3.434703  | 1.396303  | -1.312459 |
| H | 4.230709  | 2.187583  | 0.070290  |
| H | 4.742188  | -0.158242 | 0.455278  |
| H | 3.565395  | -0.922534 | 1.533312  |
| H | 4.070266  | -2.242022 | -0.540515 |
| H | 3.341790  | -0.957852 | -1.525861 |
| H | 2.385163  | -3.696484 | -1.384138 |
| H | 1.443216  | -2.435353 | -2.213093 |
| H | 0.045833  | -4.394317 | -1.451027 |
| H | 0.536395  | -4.070457 | 0.220387  |
| C | -0.055276 | 0.322889  | 1.957950  |
| C | -1.112128 | -0.502467 | 2.668301  |
| O | -2.043748 | -1.033735 | 2.123788  |
| O | -0.888506 | -0.511859 | 3.989951  |
| N | 0.001840  | 0.003197  | 0.513350  |
| H | -0.338309 | 1.371073  | 2.069898  |
| H | 0.927559  | 0.185376  | 2.403295  |
| H | -1.611220 | -0.992234 | 4.424944  |
| H | 0.592305  | -0.821002 | 0.319807  |
| H | 0.410521  | 0.801510  | -0.004039 |
| H | -0.937590 | -0.175876 | 0.107690  |

H<sup>+</sup>G[N]-tt(-0/-00/-0/-00/+00/-0) #1242

|   |           |           |           |
|---|-----------|-----------|-----------|
| C | 2.110549  | 2.915528  | -0.465974 |
| C | 2.982264  | 1.735465  | -0.830458 |
| O | 2.795396  | 0.714754  | 0.143623  |
| C | 3.539248  | -0.483429 | -0.071393 |
| C | 3.072428  | -1.303294 | -1.268512 |
| O | 1.656453  | -1.461484 | -1.206513 |
| C | 1.159147  | -2.530885 | -2.013396 |
| C | -0.347769 | -2.428498 | -2.118680 |
| O | -0.901514 | -2.532158 | -0.814074 |
| C | -2.304139 | -2.756231 | -0.746637 |
| C | -3.127751 | -1.481252 | -0.828773 |
| O | -2.786088 | -0.644978 | 0.283545  |
| C | -3.649542 | 0.478558  | 0.492178  |
| C | -3.303678 | 1.678472  | -0.370750 |
| O | -2.002161 | 2.132654  | -0.018186 |
| C | -1.557035 | 3.231554  | -0.805872 |
| C | -0.167870 | 3.631497  | -0.365451 |
| O | 0.733575  | 2.546831  | -0.599322 |
| H | 2.335365  | 3.749018  | -1.143211 |
| H | 2.317597  | 3.239537  | 0.562138  |
| H | 4.032035  | 2.058940  | -0.848541 |
| H | 2.710288  | 1.379269  | -1.830892 |
| H | 3.407704  | -1.067435 | 0.840974  |
| H | 4.608750  | -0.260868 | -0.185426 |
| H | 3.574154  | -2.278437 | -1.221078 |
| H | 3.345060  | -0.835700 | -2.223454 |
| H | 1.442775  | -3.490526 | -1.565458 |
| H | 1.586784  | -2.471581 | -3.022822 |
| H | -0.707226 | -3.247716 | -2.756335 |
| H | -0.625796 | -1.477772 | -2.594572 |
| H | -2.482706 | -3.237435 | 0.217107  |
| H | -2.627938 | -3.443057 | -1.539603 |
| H | -4.191937 | -1.744275 | -0.777643 |
| H | -2.952667 | -0.953037 | -1.774302 |
| H | -3.545541 | 0.744746  | 1.546135  |
| H | -4.691372 | 0.187005  | 0.316661  |
| H | -4.047936 | 2.467469  | -0.192006 |
| H | -3.337764 | 1.424015  | -1.439245 |
| H | -2.229186 | 4.091478  | -0.680441 |
| H | -1.547479 | 2.954010  | -1.868531 |
| H | -0.163354 | 3.902442  | 0.698302  |
| H | 0.144497  | 4.508928  | -0.945499 |
| C | 0.289537  | 0.250387  | 2.095456  |
| C | 0.572789  | -1.036737 | 2.847145  |
| O | 0.887811  | -2.071399 | 2.322705  |
| O | 0.465405  | -0.841744 | 4.169142  |
| N | 0.011213  | -0.018524 | 0.665240  |
| H | -0.548641 | 0.787080  | 2.537116  |
| H | 1.179815  | 0.878599  | 2.159201  |
| H | 0.704142  | -1.664312 | 4.626000  |
| H | 0.158126  | 0.851110  | 0.125640  |
| H | -0.965636 | -0.332603 | 0.519096  |
| H | 0.639512  | -0.735851 | 0.263360  |

H<sup>+</sup>G[N]-tt(-00/+0/+0/+0/+00/--0) #1783

|   |           |           |           |
|---|-----------|-----------|-----------|
| C | 2.935881  | 2.120685  | -0.339303 |
| C | 1.933120  | 3.204399  | -0.017060 |
| O | 0.630997  | 2.765616  | -0.388976 |
| C | -0.372501 | 3.758384  | -0.208888 |
| C | -1.714874 | 3.171572  | -0.582058 |
| O | -2.020678 | 2.108589  | 0.328224  |
| C | -3.363761 | 1.606697  | 0.257019  |
| C | -3.495873 | 0.386509  | -0.635972 |
| O | -2.757850 | -0.676560 | -0.042241 |
| C | -2.803733 | -1.921823 | -0.743607 |
| C | -1.887994 | -1.953746 | -1.960966 |
| O | -0.525057 | -1.684357 | -1.611934 |
| C | 0.380605  | -2.794970 | -1.689374 |
| C | 1.789357  | -2.275110 | -1.873690 |
| O | 2.172161  | -1.517929 | -0.731136 |
| C | 3.462346  | -0.937635 | -0.837661 |
| C | 3.682877  | -0.056517 | 0.380005  |
| O | 2.706603  | 0.986509  | 0.504832  |
| H | 3.946842  | 2.507866  | -0.161560 |
| H | 2.847861  | 1.841286  | -1.395201 |
| H | 2.205524  | 4.108472  | -0.578864 |
| H | 1.962983  | 3.443797  | 1.054484  |
| H | -0.171648 | 4.627659  | -0.850163 |
| H | -0.391065 | 4.096819  | 0.835776  |
| H | -1.692742 | 2.801953  | -1.614446 |
| H | -2.478090 | 3.955096  | -0.506040 |
| H | -4.040025 | 2.394868  | -0.090516 |
| H | -3.647796 | 1.340950  | 1.277856  |
| H | -3.129904 | 0.608875  | -1.646611 |
| H | -4.558323 | 0.115160  | -0.712395 |
| H | -3.832732 | -2.147400 | -1.055089 |
| H | -2.490025 | -2.674925 | -0.019191 |
| H | -2.183703 | -1.198380 | -2.695090 |
| H | -1.977241 | -2.932568 | -2.444464 |
| H | 0.131190  | -3.418595 | -2.555382 |
| H | 0.310671  | -3.399286 | -0.779765 |
| H | 1.841768  | -1.647136 | -2.773358 |
| H | 2.465178  | -3.131399 | -2.008464 |
| H | 3.543572  | -0.360481 | -1.769270 |
| H | 4.241941  | -1.712861 | -0.858915 |
| H | 4.690938  | 0.373469  | 0.353862  |
| H | 3.591442  | -0.655950 | 1.287813  |
| C | -0.277281 | -0.266435 | 2.126598  |
| C | -0.175791 | -1.751932 | 2.416264  |
| O | -0.209240 | -2.617639 | 1.581669  |
| O | -0.088976 | -1.961914 | 3.736155  |
| N | -0.021061 | 0.040656  | 0.699031  |
| H | 0.414869  | 0.294291  | 2.753734  |
| H | -1.291787 | 0.047439  | 2.377481  |
| H | -0.083486 | -2.918236 | 3.902213  |
| H | -0.597939 | 0.853132  | 0.422952  |
| H | -0.270957 | -0.739268 | 0.063156  |
| H | 0.972169  | 0.281786  | 0.531663  |

**Structures (His)H<sup>+</sup>-18C6**H<sup>+</sup>H[Na]-cggc(-00/+00/--0/-00/-00/--0) 695

|   |           |           |           |
|---|-----------|-----------|-----------|
| C | -0.121408 | -2.435791 | 2.835191  |
| C | -0.870243 | -1.202335 | 3.284493  |
| O | -0.190293 | -0.035023 | 2.815610  |
| C | -0.635671 | 1.170728  | 3.437051  |
| C | 0.285655  | 2.304710  | 3.051501  |
| O | 0.185882  | 2.536858  | 1.652369  |
| C | 1.029192  | 3.591429  | 1.196820  |
| C | 0.929517  | 3.672404  | -0.315044 |
| O | 1.453516  | 2.514690  | -0.969484 |
| C | 2.846990  | 2.601214  | -1.302548 |
| C | 3.289606  | 1.318443  | -1.965307 |
| O | 3.279773  | 0.268791  | -1.004466 |
| C | 3.694158  | -0.977976 | -1.555782 |
| C | 3.591432  | -2.050018 | -0.497181 |
| O | 2.214364  | -2.292779 | -0.190366 |
| C | 2.020682  | -3.373959 | 0.715724  |
| C | 0.531895  | -3.637469 | 0.865455  |
| O | -0.191603 | -2.536393 | 1.417663  |
| H | -0.581449 | -3.319064 | 3.299793  |
| H | 0.918882  | -2.369568 | 3.176039  |
| H | -0.904962 | -1.194836 | 4.381314  |
| H | -1.900658 | -1.218404 | 2.906024  |
| H | -0.614890 | 1.056308  | 4.528461  |
| H | -1.667797 | 1.395145  | 3.135935  |
| H | 1.320039  | 2.052035  | 3.320308  |
| H | -0.006205 | 3.203433  | 3.612884  |
| H | 2.065195  | 3.406532  | 1.511403  |
| H | 0.709345  | 4.549140  | 1.631850  |
| H | 1.443726  | 4.572532  | -0.670338 |
| H | -0.120242 | 3.748838  | -0.608061 |
| H | 3.444994  | 2.780062  | -0.401046 |
| H | 2.998852  | 3.436043  | -1.997646 |
| H | 4.305681  | 1.464726  | -2.359053 |
| H | 2.622499  | 1.072185  | -2.799925 |
| H | 4.739833  | -0.914762 | -1.889098 |
| H | 3.063942  | -1.237400 | -2.413770 |
| H | 4.127373  | -1.745489 | 0.411103  |
| H | 4.048088  | -2.971588 | -0.880012 |
| H | 2.491833  | -3.145648 | 1.681463  |
| H | 2.494522  | -4.283453 | 0.321173  |
| H | 0.382387  | -4.537916 | 1.474932  |
| H | 0.096835  | -3.819122 | -0.119486 |
| C | -4.439927 | 0.916852  | -0.166916 |
| C | -3.342652 | 0.442189  | -0.837097 |
| N | -3.741972 | -0.536735 | -1.724265 |
| C | -5.048300 | -0.653292 | -1.603530 |
| N | -5.514690 | 0.211280  | -0.670058 |
| C | -1.902556 | 0.855531  | -0.740256 |
| C | -0.918577 | -0.335621 | -0.863360 |
| H | -1.341504 | -1.217094 | -0.377450 |

|   |           |           |           |
|---|-----------|-----------|-----------|
| C | -0.552532 | -0.695191 | -2.323459 |
| O | -1.541483 | -1.089560 | -3.099670 |
| O | 0.592576  | -0.619716 | -2.702583 |
| N | 0.352240  | -0.032277 | -0.140100 |
| H | -4.555283 | 1.674700  | 0.589288  |
| H | -5.679936 | -1.331536 | -2.154826 |
| H | -6.479318 | 0.320458  | -0.394441 |
| H | -1.733700 | 1.354264  | 0.216618  |
| H | -1.668925 | 1.593810  | -1.516041 |
| H | 1.041273  | -0.795054 | -0.265238 |
| H | 0.175539  | 0.058107  | 0.872636  |
| H | 0.792264  | 0.843497  | -0.478432 |
| H | -2.442697 | -1.022789 | -2.652531 |

H<sup>+</sup>H[Na]-cggc(--0/-00/+0/+00/-00/+00) 293

|   |           |           |           |
|---|-----------|-----------|-----------|
| C | 1.629979  | -3.266490 | 1.529691  |
| C | 0.139421  | -3.218797 | 1.819320  |
| O | -0.358369 | -1.908114 | 2.088550  |
| C | -0.071397 | -1.420804 | 3.394569  |
| C | -0.696900 | -0.055615 | 3.563132  |
| O | -0.068625 | 0.873066  | 2.675669  |
| C | -0.408727 | 2.232191  | 2.955353  |
| C | 0.350822  | 3.143388  | 2.018765  |
| O | -0.111427 | 2.915544  | 0.691910  |
| C | 0.412647  | 3.797802  | -0.298630 |
| C | 1.857773  | 3.527526  | -0.679225 |
| O | 1.986936  | 2.206831  | -1.195942 |
| C | 3.322668  | 1.930473  | -1.639107 |
| C | 3.444907  | 0.493422  | -2.084501 |
| O | 3.311100  | -0.357213 | -0.951353 |
| C | 3.501920  | -1.732193 | -1.268919 |
| C | 3.287949  | -2.554944 | -0.021435 |
| O | 1.913462  | -2.480709 | 0.376675  |
| H | 1.911019  | -4.313626 | 1.350374  |
| H | 2.221507  | -2.907572 | 2.382843  |
| H | -0.085769 | -3.892357 | 2.656637  |
| H | -0.410773 | -3.571680 | 0.944512  |
| H | 1.010186  | -1.347781 | 3.560452  |
| H | -0.491875 | -2.097048 | 4.151921  |
| H | -0.552852 | 0.269085  | 4.601527  |
| H | -1.774502 | -0.099515 | 3.359479  |
| H | -0.136785 | 2.475935  | 3.990524  |
| H | -1.489593 | 2.383724  | 2.836431  |
| H | 1.425656  | 2.942853  | 2.103253  |
| H | 0.168377  | 4.186233  | 2.312668  |
| H | 0.323403  | 4.840821  | 0.033761  |
| H | -0.225913 | 3.666028  | -1.174485 |
| H | 2.531843  | 3.658339  | 0.178087  |
| H | 2.150670  | 4.262474  | -1.442274 |
| H | 4.026801  | 2.128385  | -0.821132 |
| H | 3.570111  | 2.590217  | -2.480689 |
| H | 4.435378  | 0.362221  | -2.543546 |

|   |           |           |           |
|---|-----------|-----------|-----------|
| H | 2.680702  | 0.250864  | -2.831511 |
| H | 4.527901  | -1.900689 | -1.626257 |
| H | 2.800484  | -2.040337 | -2.051780 |
| H | 3.927493  | -2.188014 | 0.791572  |
| H | 3.552091  | -3.599349 | -0.230774 |
| C | -4.464395 | 0.860164  | -0.383284 |
| C | -3.359403 | 0.258452  | -0.926151 |
| N | -3.743411 | -0.906866 | -1.559351 |
| C | -5.048419 | -1.010390 | -1.412599 |
| N | -5.528193 | 0.041654  | -0.706174 |
| C | -1.925773 | 0.705254  | -0.926896 |
| C | -0.930825 | -0.473917 | -0.785094 |
| H | -1.356095 | -1.228001 | -0.120627 |
| C | -0.565399 | -1.130424 | -2.135776 |
| O | 0.570704  | -1.088257 | -2.547736 |
| O | -1.544070 | -1.723716 | -2.786510 |
| N | 0.340936  | -0.032350 | -0.133239 |
| H | -4.590687 | 1.770725  | 0.177357  |
| H | -5.669661 | -1.807235 | -1.789382 |
| H | -6.494617 | 0.198338  | -0.461591 |
| H | -1.762143 | 1.407008  | -0.107628 |
| H | -1.703685 | 1.253590  | -1.849951 |
| H | 0.152373  | 0.322822  | 0.818271  |
| H | 0.839015  | 0.706264  | -0.656758 |
| H | 0.991316  | -0.832491 | -0.039694 |
| H | -2.445482 | -1.577346 | -2.355641 |

H<sup>+</sup>H[N $\alpha$ ]-cggc(-00/+00/-00/+00/-00/+00) 400

|   |           |           |           |
|---|-----------|-----------|-----------|
| C | -1.041336 | 2.761459  | 2.451050  |
| C | -0.809707 | 3.515683  | 1.162065  |
| O | 0.375619  | 3.023707  | 0.558496  |
| C | 0.751697  | 3.703496  | -0.634711 |
| C | 2.186446  | 3.363473  | -0.963595 |
| O | 2.322119  | 1.972692  | -1.243595 |
| C | 3.694225  | 1.612417  | -1.456746 |
| C | 3.832038  | 0.123730  | -1.661665 |
| O | 3.500519  | -0.543814 | -0.448459 |
| C | 3.653800  | -1.955538 | -0.532751 |
| C | 3.253117  | -2.566665 | 0.788143  |
| O | 1.851260  | -2.366428 | 1.019289  |
| C | 1.430288  | -2.917522 | 2.265518  |
| C | -0.041551 | -2.651347 | 2.483564  |
| O | -0.240326 | -1.246116 | 2.583926  |
| C | -1.531793 | -0.857092 | 3.028111  |
| C | -1.499640 | 0.618613  | 3.354250  |
| O | -1.242244 | 1.374974  | 2.169824  |
| H | -1.924151 | 3.175294  | 2.956618  |
| H | -0.174180 | 2.881876  | 3.112235  |
| H | -0.710567 | 4.585378  | 1.393512  |
| H | -1.669545 | 3.398635  | 0.486041  |
| H | 0.680852  | 4.790512  | -0.494255 |
| H | 0.083647  | 3.424685  | -1.461829 |

|   |           |           |           |
|---|-----------|-----------|-----------|
| H | 2.827676  | 3.634390  | -0.115093 |
| H | 2.500542  | 3.953331  | -1.835753 |
| H | 4.287985  | 1.925829  | -0.589053 |
| H | 4.073430  | 2.132569  | -2.346057 |
| H | 4.875879  | -0.085694 | -1.936822 |
| H | 3.180929  | -0.219761 | -2.471852 |
| H | 4.704410  | -2.214785 | -0.728224 |
| H | 3.038113  | -2.356477 | -1.345250 |
| H | 3.824732  | -2.108892 | 1.605045  |
| H | 3.469304  | -3.642422 | 0.768108  |
| H | 2.009746  | -2.472550 | 3.084448  |
| H | 1.600592  | -4.002462 | 2.269445  |
| H | -0.351874 | -3.149324 | 3.412155  |
| H | -0.636884 | -3.070741 | 1.659759  |
| H | -1.809783 | -1.408290 | 3.936867  |
| H | -2.289287 | -1.068573 | 2.259330  |
| H | -0.712256 | 0.809981  | 4.093825  |
| H | -2.463780 | 0.917696  | 3.786990  |
| C | -4.313417 | 0.537679  | -1.018773 |
| C | -3.114101 | -0.057508 | -1.312558 |
| N | -3.349048 | -1.312465 | -1.836882 |
| C | -4.655898 | -1.476231 | -1.870335 |
| N | -5.280332 | -0.376688 | -1.384226 |
| C | -1.718444 | 0.480227  | -1.160771 |
| C | -0.681980 | -0.607776 | -0.787983 |
| H | -1.142357 | -1.321445 | -0.102624 |
| C | -0.126639 | -1.380074 | -2.008702 |
| O | -0.983272 | -2.121426 | -2.678261 |
| O | 1.041306  | -1.291754 | -2.303620 |
| N | 0.474440  | -0.011607 | -0.048096 |
| H | -4.562378 | 1.498545  | -0.601651 |
| H | -5.178399 | -2.349155 | -2.227895 |
| H | -6.278563 | -0.248926 | -1.307511 |
| H | -1.723035 | 1.228711  | -0.368482 |
| H | -1.400536 | 0.981539  | -2.082152 |
| H | 1.095630  | -0.762128 | 0.308623  |
| H | 0.130976  | 0.524141  | 0.761639  |
| H | 1.062472  | 0.614915  | -0.626089 |
| H | -1.937215 | -1.987890 | -2.375079 |

H<sup>+</sup>H[N $\alpha$ ]-cggc(+00/-00/+00/--0/-00/+0+) 6092

|   |           |           |           |
|---|-----------|-----------|-----------|
| C | 2.919259  | 2.346796  | -1.535495 |
| C | 3.423426  | 0.998226  | -1.993156 |
| O | 3.299926  | 0.057944  | -0.931453 |
| C | 3.744694  | -1.241950 | -1.307504 |
| C | 3.451846  | -2.214997 | -0.188918 |
| O | 2.033356  | -2.384921 | -0.083200 |
| C | 1.597776  | -3.463657 | 0.744371  |
| C | 1.379762  | -3.053976 | 2.187865  |
| O | 0.343390  | -2.078167 | 2.228257  |
| C | 0.089444  | -1.592531 | 3.538214  |
| C | -0.902170 | -0.454259 | 3.470245  |

|   |           |           |           |                                                    |           |                     |
|---|-----------|-----------|-----------|----------------------------------------------------|-----------|---------------------|
| O | -0.320840 | 0.635000  | 2.748863  |                                                    |           |                     |
| C | -0.934659 | 1.896412  | 3.009829  | H <sup>+</sup> H[Na]-cggc(+0+/-00/-00/+0+/-00/-00) | 3671      |                     |
| C | -0.070701 | 2.998751  | 2.442133  | C                                                  | 3.983793  | -0.154149 -1.347279 |
| O | -0.024568 | 2.877968  | 1.027094  | C                                                  | 3.484503  | -1.579537 -1.411039 |
| C | 0.817754  | 3.845594  | 0.408302  | O                                                  | 2.636535  | -1.842474 -0.287355 |
| C | 0.879803  | 3.551553  | -1.078911 | C                                                  | 2.215204  | -3.205533 -0.224698 |
| O | 1.494340  | 2.297897  | -1.379264 | C                                                  | 1.504203  | -3.448919 1.086424  |
| H | 3.171336  | 3.096036  | -2.295997 | O                                                  | 0.270411  | -2.728232 1.099973  |
| H | 3.401230  | 2.627724  | -0.591479 | C                                                  | -0.433711 | -2.786648 2.335149  |
| H | 4.478070  | 1.103273  | -2.285446 | C                                                  | 0.016005  | -1.733776 3.332856  |
| H | 2.848240  | 0.659491  | -2.862905 | O                                                  | -0.266850 | -0.431775 2.811445  |
| H | 4.828073  | -1.232046 | -1.494155 | C                                                  | 0.074489  | 0.607208 3.730703   |
| H | 3.230198  | -1.565052 | -2.219776 | C                                                  | -0.295931 | 1.950207 3.145725   |
| H | 3.917147  | -3.178983 | -0.427782 | O                                                  | 0.491103  | 2.177792 1.985503   |
| H | 3.869876  | -1.846681 | 0.755976  | C                                                  | 0.338593  | 3.477387 1.428296   |
| H | 0.654695  | -3.815210 | 0.318777  | C                                                  | 1.351563  | 3.659242 0.322019   |
| H | 2.316766  | -4.289671 | 0.700124  | O                                                  | 1.048910  | 2.777244 -0.760126  |
| H | 2.299249  | -2.641055 | 2.625324  | C                                                  | 1.958836  | 2.881702 -1.865126  |
| H | 1.095922  | -3.940741 | 2.772882  | C                                                  | 3.240430  | 2.093007 -1.655692  |
| H | 1.021922  | -1.238573 | 3.998091  | O                                                  | 2.883960  | 0.730322 -1.516178  |
| H | -0.325134 | -2.390102 | 4.171271  | H                                                  | 4.717358  | -0.008876 -2.152643 |
| H | -1.832760 | -0.777128 | 2.985341  | H                                                  | 4.483130  | 0.037056 -0.387194  |
| H | -1.140224 | -0.140049 | 4.494044  | H                                                  | 4.348173  | -2.257042 -1.384074 |
| H | -1.941572 | 1.931544  | 2.571734  | H                                                  | 2.927292  | -1.741960 -2.339064 |
| H | -1.029521 | 2.048386  | 4.092581  | H                                                  | 3.089514  | -3.868162 -0.273154 |
| H | -0.496412 | 3.969676  | 2.732780  | H                                                  | 1.557370  | -3.434337 -1.071488 |
| H | 0.941725  | 2.927570  | 2.861538  | H                                                  | 2.149555  | -3.131718 1.914724  |
| H | 0.412987  | 4.856898  | 0.558258  | H                                                  | 1.305773  | -4.523928 1.191957  |
| H | 1.819354  | 3.814472  | 0.858370  | H                                                  | -0.336464 | -3.779505 2.792690  |
| H | 1.407595  | 4.363437  | -1.592621 | H                                                  | -1.489568 | -2.632407 2.097731  |
| H | -0.134112 | 3.501863  | -1.482706 | H                                                  | 1.089176  | -1.819811 3.547137  |
| C | -4.508204 | 0.586872  | -0.345839 | H                                                  | -0.529697 | -1.881672 4.274783  |
| C | -3.367635 | 0.075143  | -0.907922 | H                                                  | 1.150489  | 0.577916 3.944529   |
| N | -3.682158 | -1.073687 | -1.605872 | H                                                  | -0.470764 | 0.464794 4.672998   |
| C | -4.980605 | -1.254777 | -1.478906 | H                                                  | -0.103212 | 2.725934 3.899707   |
| N | -5.523086 | -0.269689 | -0.722798 | H                                                  | -1.366919 | 1.976179 2.897800   |
| C | -1.960261 | 0.598708  | -0.874268 | H                                                  | 0.516670  | 4.244109 2.194908   |
| C | -0.897783 | -0.528269 | -0.824471 | H                                                  | -0.680584 | 3.614359 1.040071   |
| H | -1.274859 | -1.362970 | -0.229486 | H                                                  | 2.355077  | 3.461866 0.715826   |
| C | -0.497345 | -1.049679 | -2.227986 | H                                                  | 1.313372  | 4.698633 -0.029482  |
| O | -1.442978 | -1.658921 | -2.917123 | H                                                  | 2.190813  | 3.935121 -2.061645  |
| O | 0.625776  | -0.894441 | -2.641602 | H                                                  | 1.426707  | 2.478418 -2.728345  |
| N | 0.347186  | -0.055950 | -0.149655 | H                                                  | 3.792420  | 2.442424 -0.771098  |
| H | -4.689988 | 1.459623  | 0.258100  | H                                                  | 3.889488  | 2.240459 -2.531425  |
| H | -5.554443 | -2.062686 | -1.904260 | C                                                  | -4.464556 | 0.984084 -0.054971  |
| H | -6.498577 | -0.178737 | -0.480791 | C                                                  | -3.419590 | 0.459816 -0.770435  |
| H | -1.832583 | 1.245837  | -0.004575 | N                                                  | -3.902826 | -0.490987 -1.644580 |
| H | -1.771196 | 1.227796  | -1.751647 | C                                                  | -5.207146 | -0.545417 -1.472358 |
| H | 0.156767  | 0.216686  | 0.827139  | N                                                  | -5.592043 | 0.336023 -0.517664  |
| H | 1.050150  | -0.820246 | -0.139777 | C                                                  | -1.959465 | 0.803402 -0.729288  |
| H | 0.775125  | 0.752034  | -0.640558 | C                                                  | -1.017160 | -0.425014 -0.740033 |
| H | -2.342260 | -1.609747 | -2.468149 | H                                                  | -1.433550 | -1.216777 -0.114413 |

|   |           |           |           |
|---|-----------|-----------|-----------|
| C | -0.724620 | -1.064102 | -2.124998 |
| O | 0.415786  | -1.312193 | -2.440105 |
| O | -1.753276 | -1.350118 | -2.891933 |
| N | 0.295570  | -0.054236 | -0.123944 |
| H | -4.512436 | 1.740106  | 0.710204  |
| H | -5.892230 | -1.189589 | -2.000136 |
| H | -6.538328 | 0.491187  | -0.203101 |
| H | -1.765458 | 1.369168  | 0.184296  |
| H | -1.700117 | 1.465035  | -1.563119 |
| H | 0.217483  | -0.065325 | 0.904169  |
| H | 0.618044  | 0.885362  | -0.410110 |
| H | 1.041222  | -0.724595 | -0.391554 |
| H | -2.649971 | -1.110315 | -2.489499 |

H<sup>+</sup>H[Na]-cggc(+00/-00/+0+/-00/-00/+0+) 7638

|   |           |           |           |
|---|-----------|-----------|-----------|
| C | 3.374676  | -2.118454 | -0.964420 |
| C | 2.944729  | -2.789035 | 0.318712  |
| O | 1.537857  | -2.582799 | 0.500484  |
| C | 0.967918  | -3.261552 | 1.620613  |
| C | 1.003153  | -2.436282 | 2.892287  |
| O | 0.191129  | -1.280811 | 2.706090  |
| C | 0.235285  | -0.390840 | 3.812260  |
| C | -0.620496 | 0.820189  | 3.523010  |
| O | -0.077936 | 1.536493  | 2.410323  |
| C | -0.547794 | 2.882096  | 2.318853  |
| C | 0.211602  | 3.606042  | 1.231035  |
| O | -0.118536 | 3.020994  | -0.023156 |
| C | 0.490692  | 3.636270  | -1.156879 |
| C | 1.954624  | 3.278001  | -1.343936 |
| O | 2.084265  | 1.872828  | -1.532221 |
| C | 3.440915  | 1.479943  | -1.774757 |
| C | 3.526752  | -0.006845 | -2.021400 |
| O | 3.252808  | -0.708110 | -0.812224 |
| H | 2.747621  | -2.463941 | -1.794139 |
| H | 4.419515  | -2.389792 | -1.172695 |
| H | 3.506830  | -2.378047 | 1.166064  |
| H | 3.148896  | -3.864417 | 0.248166  |
| H | 1.480254  | -4.216176 | 1.786589  |
| H | -0.069550 | -3.479523 | 1.355332  |
| H | 2.031280  | -2.136825 | 3.137871  |
| H | 0.619962  | -3.042112 | 3.726010  |
| H | 1.270260  | -0.076445 | 4.003266  |
| H | -0.146758 | -0.883095 | 4.718011  |
| H | -0.623107 | 1.461991  | 4.412951  |
| H | -1.655532 | 0.521942  | 3.311126  |
| H | -0.378825 | 3.398653  | 3.272434  |
| H | -1.625222 | 2.897026  | 2.106604  |
| H | 1.287450  | 3.536380  | 1.431400  |
| H | -0.074715 | 4.666961  | 1.242869  |
| H | 0.394624  | 4.728604  | -1.097655 |
| H | -0.080672 | 3.292443  | -2.021600 |
| H | 2.561193  | 3.597970  | -0.485868 |

|   |           |           |           |
|---|-----------|-----------|-----------|
| H | 2.327926  | 3.812905  | -2.228595 |
| H | 4.063537  | 1.757119  | -0.914371 |
| H | 3.817255  | 2.006517  | -2.661330 |
| H | 4.544697  | -0.236257 | -2.367635 |
| H | 2.815275  | -0.307689 | -2.798474 |
| C | -4.541599 | 0.623595  | -0.365718 |
| C | -3.417553 | 0.003687  | -0.845640 |
| N | -3.753722 | -1.256749 | -1.298541 |
| C | -5.049105 | -1.399442 | -1.106305 |
| N | -5.568501 | -0.281745 | -0.543400 |
| C | -2.008032 | 0.513120  | -0.946380 |
| C | -0.956242 | -0.596858 | -0.699245 |
| H | -1.336946 | -1.295979 | 0.048056  |
| C | -0.594741 | -1.376855 | -1.986507 |
| O | -1.554137 | -2.107386 | -2.517413 |
| O | 0.513898  | -1.295993 | -2.459445 |
| N | 0.313361  | -0.044138 | -0.136704 |
| H | -4.704328 | 1.598330  | 0.061840  |
| H | -5.636332 | -2.269995 | -1.351695 |
| H | -6.537022 | -0.137739 | -0.299235 |
| H | -1.855156 | 1.319080  | -0.228076 |
| H | -1.837707 | 0.955519  | -1.934670 |
| H | 0.141560  | 0.479953  | 0.736219  |
| H | 0.816026  | 0.580700  | -0.788816 |
| H | 0.949885  | -0.832649 | 0.082482  |
| H | -2.443639 | -1.965395 | -2.064928 |

H<sup>+</sup>H[Na]-cggc(+00/-00/+00/-0/-00/+0+) 13344

|   |           |           |           |
|---|-----------|-----------|-----------|
| C | -3.506548 | 0.900974  | -1.896560 |
| C | -3.923129 | -0.504197 | -1.529094 |
| O | -2.763887 | -1.311147 | -1.358036 |
| C | -3.045819 | -2.675225 | -1.109078 |
| C | -1.722845 | -3.393463 | -0.905696 |
| O | -0.949489 | -2.864062 | 0.180155  |
| C | -1.419499 | -3.251505 | 1.473312  |
| C | -0.447125 | -2.788203 | 2.532825  |
| O | -0.458624 | -1.366935 | 2.594271  |
| C | 0.345204  | -0.839000 | 3.640449  |
| C | 0.229309  | 0.668123  | 3.631694  |
| O | 0.762293  | 1.163276  | 2.400963  |
| C | 0.906829  | 2.586628  | 2.337885  |
| C | -0.378293 | 3.314806  | 1.986854  |
| O | -0.807932 | 2.882590  | 0.705899  |
| C | -2.040567 | 3.475564  | 0.299784  |
| C | -2.496239 | 2.867522  | -1.006404 |
| O | -2.798123 | 1.488097  | -0.800006 |
| H | -4.410323 | 1.488586  | -2.106092 |
| H | -2.870685 | 0.889429  | -2.786622 |
| H | -4.549109 | -0.904047 | -2.339094 |
| H | -4.517359 | -0.497538 | -0.604742 |
| H | -3.563547 | -3.132946 | -1.964998 |
| H | -3.702242 | -2.780093 | -0.233302 |



H<sup>+</sup>H[N<sub>α</sub>]-cggc(-0/-00/-00/-00/-00/--0) 11

|   |           |           |           |
|---|-----------|-----------|-----------|
| C | -0.825708 | 1.623003  | 3.163278  |
| C | 0.147803  | 2.677836  | 2.685795  |
| O | 0.123639  | 2.727162  | 1.263668  |
| C | 1.034521  | 3.675300  | 0.710188  |
| C | 0.979344  | 3.573300  | -0.803617 |
| O | 1.475139  | 2.319796  | -1.285018 |
| C | 2.846389  | 2.341591  | -1.715138 |
| C | 3.351467  | 0.927212  | -1.893342 |
| O | 3.443227  | 0.324588  | -0.605064 |
| C | 4.155777  | -0.908086 | -0.548683 |
| C | 3.289764  | -2.132346 | -0.799683 |
| O | 2.279870  | -2.166947 | 0.218349  |
| C | 1.548479  | -3.387840 | 0.318161  |
| C | 0.880354  | -3.427399 | 1.676871  |
| O | -0.033520 | -2.336264 | 1.801467  |
| C | -0.361625 | -2.036778 | 3.152082  |
| C | -1.161204 | -0.753820 | 3.222764  |
| O | -0.366341 | 0.336568  | 2.745481  |
| H | -1.828656 | 1.819785  | 2.761130  |
| H | -0.881319 | 1.659504  | 4.258646  |
| H | 1.159067  | 2.438735  | 3.040253  |
| H | -0.145647 | 3.648590  | 3.108992  |
| H | 2.051208  | 3.477882  | 1.075552  |
| H | 0.752829  | 4.693439  | 1.014573  |
| H | 1.542019  | 4.400400  | -1.248917 |
| H | -0.057591 | 3.656318  | -1.138593 |
| H | 3.464771  | 2.855586  | -0.970813 |
| H | 2.914644  | 2.879271  | -2.668498 |
| H | 4.344003  | 0.975479  | -2.362204 |
| H | 2.680875  | 0.360369  | -2.549212 |
| H | 4.569453  | -0.965601 | 0.460678  |
| H | 4.989711  | -0.904960 | -1.262594 |
| H | 3.920487  | -3.027788 | -0.723557 |
| H | 2.820647  | -2.111357 | -1.787820 |
| H | 2.227582  | -4.245988 | 0.240900  |
| H | 0.815153  | -3.464384 | -0.494595 |
| H | 1.650382  | -3.350940 | 2.454011  |
| H | 0.353380  | -4.382934 | 1.801322  |
| H | 0.557077  | -1.924282 | 3.742075  |
| H | -0.958264 | -2.846635 | 3.595939  |
| H | -1.438661 | -0.581523 | 4.270040  |
| H | -2.084578 | -0.832165 | 2.633857  |
| C | -4.391589 | 0.952423  | -0.423322 |
| C | -3.285269 | 0.356411  | -0.970399 |
| N | -3.679214 | -0.751960 | -1.692614 |
| C | -4.990540 | -0.828020 | -1.594577 |
| N | -5.465384 | 0.187798  | -0.833957 |
| C | -1.840876 | 0.759227  | -0.902428 |
| C | -0.874719 | -0.445018 | -0.759368 |
| H | -1.330117 | -1.215639 | -0.133391 |

|   |           |           |           |
|---|-----------|-----------|-----------|
| C | -0.476510 | -1.095190 | -2.104873 |
| O | -1.450938 | -1.578586 | -2.844400 |
| O | 0.688059  | -1.162943 | -2.429201 |
| N | 0.375599  | -0.026348 | -0.061336 |
| H | -4.513406 | 1.829307  | 0.189648  |
| H | -5.619512 | -1.579996 | -2.043842 |
| H | -6.435210 | 0.356438  | -0.611446 |
| H | -1.692281 | 1.429755  | -0.053745 |
| H | -1.568165 | 1.331763  | -1.796368 |
| H | 0.167134  | 0.213061  | 0.921420  |
| H | 0.816886  | 0.796655  | -0.512187 |
| H | 1.080159  | -0.790144 | -0.040867 |
| H | -2.369294 | -1.402269 | -2.459542 |

H<sup>+</sup>H[N<sub>α</sub>]-cggc(-00/+00/-00/+00/+00/--0) 1225

|   |           |           |           |
|---|-----------|-----------|-----------|
| C | 3.399083  | 1.287668  | -1.857921 |
| C | 2.912146  | 2.572917  | -1.232944 |
| O | 1.505699  | 2.476446  | -0.958231 |
| C | 0.940148  | 3.655648  | -0.378193 |
| C | 0.918131  | 3.610786  | 1.137759  |
| O | -0.013914 | 2.613024  | 1.547386  |
| C | 0.001131  | 2.372663  | 2.948165  |
| C | -1.088772 | 1.383167  | 3.297982  |
| O | -0.882377 | 0.145386  | 2.607727  |
| C | -1.157586 | -1.012034 | 3.400930  |
| C | -0.965471 | -2.257281 | 2.563785  |
| O | 0.360303  | -2.259435 | 2.066364  |
| C | 0.742519  | -3.453057 | 1.394727  |
| C | 2.192221  | -3.324450 | 0.988564  |
| O | 2.333497  | -2.285120 | 0.022906  |
| C | 3.702308  | -2.051588 | -0.327477 |
| C | 3.791184  | -1.002686 | -1.408999 |
| O | 3.361898  | 0.251150  | -0.884756 |
| H | 4.429368  | 1.443007  | -2.209455 |
| H | 2.772469  | 1.022353  | -2.717494 |
| H | 3.084244  | 3.399262  | -1.933250 |
| H | 3.467832  | 2.772840  | -0.308869 |
| H | -0.082603 | 3.734315  | -0.754726 |
| H | 1.490870  | 4.541111  | -0.713996 |
| H | 0.616254  | 4.592904  | 1.528407  |
| H | 1.916594  | 3.380392  | 1.533600  |
| H | -0.180629 | 3.304759  | 3.502226  |
| H | 0.980825  | 1.978454  | 3.251507  |
| H | -2.073336 | 1.784941  | 3.031354  |
| H | -1.067974 | 1.221258  | 4.381239  |
| H | -2.190766 | -0.986039 | 3.771102  |
| H | -0.477256 | -1.034569 | 4.260844  |
| H | -1.691079 | -2.283729 | 1.736703  |
| H | -1.151309 | -3.135769 | 3.197842  |
| H | 0.109790  | -3.621134 | 0.511336  |
| H | 0.634552  | -4.320876 | 2.059743  |
| H | 2.533658  | -4.277664 | 0.563315  |



|   |           |           |           |
|---|-----------|-----------|-----------|
| H | 2.802389  | -3.100630 | 1.873009  |
| H | 4.148892  | -2.982342 | -0.700717 |
| H | 4.257986  | -1.730502 | 0.562793  |
| H | 3.168231  | -1.284606 | -2.264322 |
| H | 4.837714  | -0.935531 | -1.739270 |
| C | -4.401703 | 0.798748  | -0.510990 |
| C | -3.248271 | 0.307612  | -1.064719 |
| N | -3.562767 | -0.727933 | -1.921907 |
| C | -4.873267 | -0.860925 | -1.897699 |
| N | -5.423289 | 0.046489  | -1.055155 |
| C | -1.827586 | 0.756621  | -0.878985 |
| C | -0.812170 | -0.413826 | -0.901328 |
| H | -1.260163 | -1.290063 | -0.428200 |
| C | -0.347111 | -0.806599 | -2.324290 |
| O | -1.273199 | -1.269716 | -3.138539 |
| O | 0.812646  | -0.690914 | -2.640613 |
| N | 0.397094  | -0.061513 | -0.096986 |
| H | -4.586354 | 1.595185  | 0.189674  |
| H | -5.450042 | -1.579852 | -2.457488 |
| H | -6.408279 | 0.154744  | -0.863864 |
| H | -1.734960 | 1.278323  | 0.074999  |
| H | -1.553480 | 1.478030  | -1.657175 |
| H | 0.125201  | 0.071951  | 0.889467  |
| H | 0.844890  | 0.809654  | -0.440523 |
| H | 1.113074  | -0.810574 | -0.131685 |
| H | -2.201889 | -1.215784 | -2.747955 |

H<sup>+</sup>H[N $\alpha$ ]-cggc(-00/+00/--0/-00/+00/--0) 415

|   |           |           |           |
|---|-----------|-----------|-----------|
| C | 0.934951  | -3.251327 | 1.946295  |
| C | -0.015770 | -2.463838 | 2.817365  |
| O | 0.337482  | -1.087183 | 2.757453  |
| C | -0.387902 | -0.270491 | 3.664868  |
| C | 0.164270  | 1.134791  | 3.612762  |
| O | -0.098227 | 1.717477  | 2.333794  |
| C | 0.387800  | 3.061022  | 2.240302  |
| C | -0.000341 | 3.645655  | 0.893711  |
| O | 0.592415  | 2.960693  | -0.202742 |
| C | 1.884946  | 3.449114  | -0.567916 |
| C | 2.479389  | 2.560408  | -1.635490 |
| O | 2.772003  | 1.281466  | -1.071614 |
| C | 3.535683  | 0.452008  | -1.951963 |
| C | 3.901044  | -0.835592 | -1.248992 |
| O | 2.719557  | -1.591227 | -1.006670 |
| C | 2.953175  | -2.892437 | -0.496306 |
| C | 1.603488  | -3.570549 | -0.340056 |
| O | 0.742789  | -2.882727 | 0.579577  |
| H | 0.731450  | -4.322743 | 2.071142  |
| H | 1.966291  | -3.053095 | 2.260744  |
| H | 0.065336  | -2.834181 | 3.848677  |
| H | -1.052008 | -2.609710 | 2.481700  |
| H | -0.280096 | -0.648756 | 4.691104  |
| H | -1.458550 | -0.271948 | 3.414671  |

|   |           |           |           |
|---|-----------|-----------|-----------|
| H | 1.245284  | 1.116320  | 3.799964  |
| H | -0.313451 | 1.735751  | 4.397658  |
| H | 1.476596  | 3.068064  | 2.378505  |
| H | -0.058922 | 3.671590  | 3.036776  |
| H | 0.261471  | 4.711302  | 0.877260  |
| H | -1.082369 | 3.568593  | 0.762221  |
| H | 2.553119  | 3.468011  | 0.301956  |
| H | 1.796192  | 4.470963  | -0.960517 |
| H | 3.403874  | 3.028066  | -1.999859 |
| H | 1.787286  | 2.448714  | -2.478189 |
| H | 4.461513  | 0.971009  | -2.234346 |
| H | 2.956722  | 0.237340  | -2.856343 |
| H | 4.417661  | -0.624063 | -0.302652 |
| H | 4.585232  | -1.401152 | -1.896668 |
| H | 3.491829  | -2.841218 | 0.460991  |
| H | 3.566483  | -3.481399 | -1.193756 |
| H | 1.736181  | -4.612126 | -0.025648 |
| H | 1.083892  | -3.564501 | -1.300026 |
| C | -4.596291 | 0.368922  | 0.204317  |
| C | -3.481887 | 0.177228  | -0.570353 |
| N | -3.807053 | -0.637423 | -1.636366 |
| C | -5.086487 | -0.928941 | -1.520077 |
| N | -5.606072 | -0.337597 | -0.417500 |
| C | -2.093688 | 0.728363  | -0.403737 |
| C | -0.993880 | -0.271759 | -0.843588 |
| H | -1.310852 | -1.285720 | -0.593001 |
| C | -0.691529 | -0.206794 | -2.364422 |
| O | -1.657964 | -0.584422 | -3.172551 |
| O | 0.386157  | 0.175306  | -2.755664 |
| N | 0.297170  | -0.035863 | -0.119701 |
| H | -4.762690 | 0.931509  | 1.107275  |
| H | -5.661080 | -1.547445 | -2.190990 |
| H | -6.564324 | -0.402289 | -0.107621 |
| H | -1.939302 | 0.980823  | 0.647044  |
| H | -1.978014 | 1.660015  | -0.967477 |
| H | 0.182268  | 0.538813  | 0.727717  |
| H | 0.993299  | 0.433280  | -0.729706 |
| H | 0.703879  | -0.941585 | 0.161049  |
| H | -2.528035 | -0.751795 | -2.687684 |

H<sup>+</sup>H[N $\alpha$ ]-cggc(+00/+00/+00/+00/-00/+00) 6554

|   |           |           |           |
|---|-----------|-----------|-----------|
| C | 3.546022  | 1.715288  | -1.447821 |
| C | 3.661091  | 0.258999  | -1.827131 |
| O | 3.389877  | -0.544481 | -0.684314 |
| C | 3.524594  | -1.937922 | -0.945890 |
| C | 3.215577  | -2.702363 | 0.318190  |
| O | 1.839492  | -2.523255 | 0.677830  |
| C | 1.506726  | -3.213223 | 1.880966  |
| C | 0.087832  | -2.890356 | 2.288877  |
| O | 0.015872  | -1.505526 | 2.601783  |
| C | -1.240798 | -1.072206 | 3.092300  |
| C | -1.113808 | 0.375984  | 3.511869  |

|   |           |           |           |                                                       |                               |
|---|-----------|-----------|-----------|-------------------------------------------------------|-------------------------------|
| O | -0.683423 | 1.159982  | 2.396770  |                                                       |                               |
| C | -0.663933 | 2.565241  | 2.663233  | H <sup>+</sup> H[Na]-cggc(++0/+00/-00/+00/-00/+0+) 62 |                               |
| C | 0.308416  | 3.249601  | 1.727539  | C                                                     | -0.584200 2.814318 2.507587   |
| O | -0.098365 | 3.009303  | 0.386216  | C                                                     | -0.349586 3.553153 1.209528   |
| C | 0.579766  | 3.778559  | -0.604595 | O                                                     | 0.732168 2.943054 0.525013    |
| C | 2.045366  | 3.426383  | -0.792191 | C                                                     | 1.134434 3.629203 -0.655992   |
| O | 2.181387  | 2.059063  | -1.166492 | C                                                     | 2.373556 2.962432 -1.208386   |
| H | 3.908751  | 2.330723  | -2.281052 | O                                                     | 2.049157 1.641475 -1.642005   |
| H | 4.164115  | 1.922829  | -0.565147 | C                                                     | 3.142421 0.913746 -2.229457   |
| H | 4.686412  | 0.079643  | -2.181564 | C                                                     | 4.135991 0.388971 -1.196306   |
| H | 2.964262  | 0.014230  | -2.636124 | O                                                     | 3.549853 -0.492284 -0.244642  |
| H | 4.556131  | -2.170809 | -1.246771 | C                                                     | 3.554611 -1.872123 -0.608570  |
| H | 2.848064  | -2.237586 | -1.753280 | C                                                     | 3.121422 -2.682967 0.591080   |
| H | 3.853352  | -2.349850 | 1.138426  | O                                                     | 1.746233 -2.420874 0.904342   |
| H | 3.416368  | -3.768496 | 0.151200  | C                                                     | 1.348028 -3.018739 2.136712   |
| H | 2.193801  | -2.915532 | 2.683164  | C                                                     | -0.080948 -2.642945 2.460124  |
| H | 1.600293  | -4.296783 | 1.728572  | O                                                     | -0.150241 -1.231897 2.621895  |
| H | -0.175087 | -3.498386 | 3.165390  | C                                                     | -1.381478 -0.742879 3.131009  |
| H | -0.613491 | -3.142507 | 1.480086  | C                                                     | -1.212191 0.727004 3.444256   |
| H | -1.548819 | -1.664625 | 3.965365  | O                                                     | -0.961187 1.460051 2.241905   |
| H | -2.017235 | -1.182642 | 2.320443  | H                                                     | -1.379852 3.321385 3.069542   |
| H | -0.383344 | 0.468796  | 4.324655  | H                                                     | 0.331048 2.828540 3.112079    |
| H | -2.087827 | 0.730362  | 3.873823  | H                                                     | -0.117857 4.601461 1.444799   |
| H | -0.337432 | 2.748284  | 3.694225  | H                                                     | -1.256592 3.543246 0.587147   |
| H | -1.673894 | 2.975496  | 2.540833  | H                                                     | 1.371415 4.677043 -0.425967   |
| H | 1.320160  | 2.863824  | 1.904461  | H                                                     | 0.327162 3.615695 -1.401436   |
| H | 0.306960  | 4.327044  | 1.944597  | H                                                     | 3.147031 2.940296 -0.433001   |
| H | 0.506466  | 4.849338  | -0.369503 | H                                                     | 2.746259 3.547750 -2.058973   |
| H | 0.036244  | 3.597198  | -1.533834 | H                                                     | 3.667128 1.558556 -2.946241   |
| H | 2.626394  | 3.622035  | 0.119193  | H                                                     | 2.676881 0.093888 -2.774490   |
| H | 2.448275  | 4.075379  | -1.582358 | H                                                     | 4.566673 1.210395 -0.618514   |
| C | -4.395963 | 0.749580  | -0.677051 | H                                                     | 4.962089 -0.103638 -1.726767  |
| C | -3.247247 | 0.140768  | -1.110578 | H                                                     | 4.571923 -2.187151 -0.879139  |
| N | -3.570337 | -1.060307 | -1.711071 | H                                                     | 2.889920 -2.058202 -1.457589  |
| C | -4.881336 | -1.177554 | -1.652231 | H                                                     | 3.744535 -2.423052 1.455312   |
| N | -5.423348 | -0.100766 | -1.033733 | H                                                     | 3.248426 -3.750858 0.371967   |
| C | -1.824425 | 0.615352  | -1.036550 | H                                                     | 2.008468 -2.677196 2.943570   |
| C | -0.819441 | -0.540322 | -0.804359 | H                                                     | 1.423276 -4.112091 2.065250   |
| H | -1.278988 | -1.293506 | -0.161396 | H                                                     | -0.374653 -3.152783 3.387774  |
| C | -0.364021 | -1.222904 | -2.114578 | H                                                     | -0.760505 -2.976873 1.662525  |
| O | -1.290654 | -1.865305 | -2.794170 | H                                                     | -1.654690 -1.267736 4.056819  |
| O | 0.788483  | -1.152867 | -2.470475 | H                                                     | -2.193701 -0.894872 2.404894  |
| N | 0.398074  | -0.059001 | -0.079980 | H                                                     | -0.370105 0.853798 4.135385   |
| H | -4.573261 | 1.684869  | -0.173885 | H                                                     | -2.121682 1.106120 3.928758   |
| H | -5.464000 | -2.001065 | -2.033353 | C                                                     | -4.405916 0.723400 -0.779051  |
| H | -6.407025 | 0.053388  | -0.869018 | C                                                     | -3.250238 0.094253 -1.163019  |
| H | -1.722089 | 1.340654  | -0.228756 | N                                                     | -3.566337 -1.121057 -1.735771 |
| H | -1.555363 | 1.142355  | -1.959255 | C                                                     | -4.879178 -1.228114 -1.709902 |
| H | 0.945455  | 0.633560  | -0.618900 | N                                                     | -5.429416 -0.129692 -1.138917 |
| H | 1.032843  | -0.849931 | 0.135134  | C                                                     | -1.826221 0.562202 -1.055968  |
| H | 0.121452  | 0.373786  | 0.816475  | C                                                     | -0.827464 -0.580494 -0.745395 |
| H | -2.216535 | -1.730297 | -2.415533 | H                                                     | -1.295739 -1.286752 -0.056947 |

|   |           |           |           |
|---|-----------|-----------|-----------|
| C | -0.353214 | -1.359737 | -1.996725 |
| O | 0.814313  | -1.351695 | -2.310810 |
| O | -1.270789 | -2.019545 | -2.668936 |
| N | 0.382895  | -0.047192 | -0.051256 |
| H | -4.590710 | 1.671806  | -0.303955 |
| H | -5.456911 | -2.059104 | -2.082107 |
| H | -6.416009 | 0.035672  | -1.004991 |
| H | -1.765806 | 1.294379  | -0.249523 |
| H | -1.519560 | 1.069083  | -1.977860 |
| H | 0.984410  | -0.825004 | 0.279091  |
| H | 0.107743  | 0.501145  | 0.776553  |
| H | 0.963983  | 0.558836  | -0.666599 |
| H | -2.209035 | -1.838588 | -2.339026 |

H<sup>+</sup>H[Na]-cggc(+00/-0/-00/+00/-00/+0+) 70

|   |           |           |           |
|---|-----------|-----------|-----------|
| C | 0.719276  | 3.349862  | -1.669262 |
| C | 2.101840  | 2.871269  | -2.043535 |
| O | 2.187441  | 1.453709  | -1.938160 |
| C | 3.526284  | 0.994765  | -2.163762 |
| C | 3.630694  | -0.490341 | -1.922926 |
| O | 3.396062  | -0.753374 | -0.542766 |
| C | 3.577126  | -2.122109 | -0.205264 |
| C | 3.200830  | -2.319563 | 1.243376  |
| O | 1.786516  | -2.124035 | 1.395445  |
| C | 1.281286  | -2.411663 | 2.702279  |
| C | 1.060517  | -1.161839 | 3.531307  |
| O | 0.022895  | -0.399394 | 2.921190  |
| C | -0.377203 | 0.735413  | 3.677315  |
| C | -1.550906 | 1.384714  | 2.968259  |
| O | -1.207917 | 1.916153  | 1.684190  |
| C | -0.772244 | 3.278330  | 1.704147  |
| C | -0.594679 | 3.752298  | 0.280474  |
| O | 0.464033  | 3.014739  | -0.309050 |
| H | -0.042970 | 2.901035  | -2.321472 |
| H | 0.685827  | 4.438584  | -1.809465 |
| H | 2.838831  | 3.335898  | -1.375866 |
| H | 2.321885  | 3.186944  | -3.072925 |
| H | 4.208764  | 1.529204  | -1.490981 |
| H | 3.818550  | 1.211189  | -3.199859 |
| H | 4.645549  | -0.807793 | -2.203033 |
| H | 2.909959  | -1.038718 | -2.537739 |
| H | 4.629502  | -2.412347 | -0.337924 |
| H | 2.953946  | -2.757638 | -0.844813 |
| H | 3.752396  | -1.614490 | 1.877280  |
| H | 3.458613  | -3.342104 | 1.544109  |
| H | 1.962160  | -3.087186 | 3.230698  |
| H | 0.327895  | -2.930022 | 2.569434  |
| H | 1.980930  | -0.565673 | 3.600859  |
| H | 0.766059  | -1.455938 | 4.548805  |
| H | 0.461152  | 1.437369  | 3.789150  |
| H | -0.696744 | 0.431334  | 4.684544  |
| H | -1.977301 | 2.171364  | 3.601598  |

|   |           |           |           |
|---|-----------|-----------|-----------|
| H | -2.322593 | 0.631960  | 2.791796  |
| H | 0.175206  | 3.376068  | 2.247595  |
| H | -1.526000 | 3.902624  | 2.200751  |
| H | -0.359886 | 4.825875  | 0.286122  |
| H | -1.528936 | 3.612451  | -0.282095 |
| C | -4.485487 | 0.236282  | -0.779706 |
| C | -3.314045 | -0.422300 | -1.049001 |
| N | -3.585174 | -1.758992 | -1.259304 |
| C | -4.887061 | -1.911998 | -1.129565 |
| N | -5.473609 | -0.725432 | -0.840216 |
| C | -1.915224 | 0.118110  | -1.147926 |
| C | -0.847467 | -0.853256 | -0.587336 |
| H | -1.246541 | -1.353430 | 0.297862  |
| C | -0.376132 | -1.926868 | -1.598929 |
| O | -1.279805 | -2.785485 | -2.017974 |
| O | 0.776801  | -1.952429 | -1.960283 |
| N | 0.362604  | -0.103274 | -0.124165 |
| H | -4.702287 | 1.268241  | -0.562221 |
| H | -5.432056 | -2.836768 | -1.232540 |
| H | -6.460936 | -0.573305 | -0.696895 |
| H | -1.865982 | 1.045235  | -0.575105 |
| H | -1.673148 | 0.361382  | -2.188996 |
| H | 0.081260  | 0.639685  | 0.530193  |
| H | 0.906817  | 0.327729  | -0.890953 |
| H | 1.004931  | -0.750766 | 0.372765  |
| H | -2.214243 | -2.559817 | -1.705281 |

H<sup>+</sup>H[Na]-cggc(++0/+00/-+0/-00/+0+/-+0+) 288

|   |           |           |           |
|---|-----------|-----------|-----------|
| C | -0.037730 | 1.688571  | 3.307963  |
| C | 0.687607  | 2.712410  | 2.463923  |
| O | 0.081555  | 2.759748  | 1.175910  |
| C | 0.605242  | 3.755290  | 0.296209  |
| C | 1.873270  | 3.329242  | -0.426318 |
| O | 1.573673  | 2.205391  | -1.253529 |
| C | 2.610105  | 1.814078  | -2.170498 |
| C | 3.790191  | 1.126067  | -1.490710 |
| O | 3.425672  | -0.059055 | -0.792793 |
| C | 3.442875  | -1.250044 | -1.581207 |
| C | 3.244657  | -2.436181 | -0.666422 |
| O | 1.907979  | -2.446358 | -0.150428 |
| C | 1.697527  | -3.469826 | 0.817454  |
| C | 0.235240  | -3.485596 | 1.232843  |
| O | -0.229386 | -2.252531 | 1.780586  |
| C | 0.187826  | -1.994792 | 3.117032  |
| C | -0.376994 | -0.665390 | 3.564426  |
| O | 0.194898  | 0.382624  | 2.776968  |
| H | -1.113694 | 1.906036  | 3.324535  |
| H | 0.342078  | 1.741460  | 4.336425  |
| H | 1.749112  | 2.443951  | 2.393884  |
| H | 0.610421  | 3.692186  | 2.954867  |
| H | 0.797690  | 4.686652  | 0.844299  |
| H | -0.179948 | 3.947985  | -0.437632 |

|                                                                |           |           |           |   |           |           |           |
|----------------------------------------------------------------|-----------|-----------|-----------|---|-----------|-----------|-----------|
| H                                                              | 2.670386  | 3.087162  | 0.286440  | O | 3.403305  | -0.179492 | -0.905795 |
| H                                                              | 2.218737  | 4.166265  | -1.047755 | C | 3.676212  | -1.550268 | -1.167559 |
| H                                                              | 2.966144  | 2.696579  | -2.717477 | C | 3.488648  | -2.330561 | 0.110996  |
| H                                                              | 2.120892  | 1.142078  | -2.875743 | O | 2.100188  | -2.347948 | 0.469547  |
| H                                                              | 4.249854  | 1.784258  | -0.749118 | C | 1.843598  | -3.103299 | 1.649899  |
| H                                                              | 4.553169  | 0.911843  | -2.251297 | C | 0.347131  | -3.311788 | 1.795604  |
| H                                                              | 4.419053  | -1.358792 | -2.073348 | O | -0.394314 | -2.100866 | 1.942424  |
| H                                                              | 2.660313  | -1.228770 | -2.346389 | H | -0.734490 | -2.326998 | 3.977860  |
| H                                                              | 3.958423  | -2.386784 | 0.165248  | H | 0.575297  | -1.199101 | 3.558378  |
| H                                                              | 3.423472  | -3.360519 | -1.230451 | H | -1.586796 | -0.103190 | 4.316398  |
| H                                                              | 2.362712  | -3.310698 | 1.676584  | H | -2.376119 | -0.783233 | 2.880959  |
| H                                                              | 1.940641  | -4.451998 | 0.388776  | H | 0.412853  | 1.646714  | 3.651298  |
| H                                                              | 0.075258  | -4.306733 | 1.944182  | H | -1.280524 | 2.075976  | 4.002269  |
| H                                                              | -0.389629 | -3.672520 | 0.356974  | H | -0.230467 | 3.916468  | 2.821198  |
| H                                                              | 1.281490  | -1.964713 | 3.190846  | H | -1.466069 | 3.173980  | 1.778660  |
| H                                                              | -0.183345 | -2.781579 | 3.788509  | H | 0.583637  | 4.735990  | 0.707490  |
| H                                                              | -0.123311 | -0.515629 | 4.621499  | H | -0.227484 | 3.648276  | -0.439420 |
| H                                                              | -1.470059 | -0.657226 | 3.465499  | H | 2.750767  | 3.670465  | 0.279492  |
| C                                                              | -4.535355 | 0.934942  | 0.053623  | H | 2.037158  | 4.376624  | -1.190219 |
| C                                                              | -3.472881 | 0.434891  | -0.652551 | H | 4.077380  | 2.328340  | -0.896070 |
| N                                                              | -3.916124 | -0.575381 | -1.482837 | H | 3.460414  | 2.733172  | -2.517986 |
| C                                                              | -5.215084 | -0.685133 | -1.292974 | H | 4.459691  | 0.533758  | -2.549631 |
| N                                                              | -5.633874 | 0.213646  | -0.369601 | H | 2.704460  | 0.346761  | -2.785579 |
| C                                                              | -2.029410 | 0.847638  | -0.639763 | H | 4.715802  | -1.674602 | -1.503615 |
| C                                                              | -1.059470 | -0.353907 | -0.774955 | H | 3.006663  | -1.930900 | -1.946580 |
| H                                                              | -1.471294 | -1.214375 | -0.244322 | H | 4.074903  | -1.877720 | 0.920687  |
| C                                                              | -0.773909 | -0.748787 | -2.242656 | H | 3.835859  | -3.360446 | -0.040150 |
| O                                                              | -1.796714 | -1.180571 | -2.948658 | H | 2.271640  | -2.593956 | 2.524410  |
| O                                                              | 0.346224  | -0.658360 | -2.692368 | H | 2.320296  | -4.090272 | 1.574518  |
| N                                                              | 0.250303  | -0.050187 | -0.129198 | H | 0.155584  | -3.980722 | 2.644609  |
| H                                                              | -4.611784 | 1.718466  | 0.788244  | H | -0.038949 | -3.789292 | 0.892617  |
| H                                                              | -5.873543 | -1.381722 | -1.787005 | C | -4.421864 | 0.821343  | -0.599274 |
| H                                                              | -6.583306 | 0.333838  | -0.049474 | C | -3.279022 | 0.274215  | -1.121723 |
| H                                                              | -1.808969 | 1.377051  | 0.289067  | N | -3.612526 | -0.825392 | -1.885464 |
| H                                                              | -1.832489 | 1.559834  | -1.449192 | C | -4.923440 | -0.943752 | -1.836796 |
| H                                                              | 0.131195  | 0.143262  | 0.878194  | N | -5.456029 | 0.036768  | -1.068261 |
| H                                                              | 0.719259  | 0.768984  | -0.563786 | C | -1.851808 | 0.721508  | -0.979026 |
| H                                                              | 0.890316  | -0.860767 | -0.202311 | C | -0.849608 | -0.453636 | -0.861981 |
| H                                                              | -2.674840 | -1.099534 | -2.455340 | H | -1.290969 | -1.247506 | -0.256121 |
| H <sup>+</sup> H[N $\alpha$ ]-cggc(--0/--0/-00/+00/-00/+00) 95 |           |           |           |   |           |           |           |
| C                                                              | -0.418040 | -1.558594 | 3.258193  | C | -0.399888 | -1.047798 | -2.217193 |
| C                                                              | -1.424671 | -0.425034 | 3.282582  | O | 0.767477  | -1.024409 | -2.531479 |
| O                                                              | -1.021604 | 0.690187  | 2.474202  | O | -1.334831 | -1.578104 | -2.974917 |
| C                                                              | -0.569620 | 1.837236  | 3.202109  | N | 0.375185  | -0.016527 | -0.119619 |
| C                                                              | -0.487933 | 3.011224  | 2.253776  | H | -4.591785 | 1.672222  | 0.038223  |
| O                                                              | 0.504999  | 2.736464  | 1.277789  | H | -5.512192 | -1.702297 | -2.327486 |
| C                                                              | 0.612364  | 3.731380  | 0.264671  | H | -6.437720 | 0.169630  | -0.875626 |
| C                                                              | 1.934838  | 3.572896  | -0.447783 | H | -1.771816 | 1.326453  | -0.074289 |
| O                                                              | 2.015867  | 2.301877  | -1.086932 | H | -1.566085 | 1.360036  | -1.822902 |
| C                                                              | 3.317814  | 2.080073  | -1.647290 | H | 1.032749  | -0.807958 | 0.005733  |
| C                                                              | 3.477152  | 0.639549  | -2.067355 | H | 0.095154  | 0.319562  | 0.813924  |
|                                                                |           |           |           | H | 0.902798  | 0.739829  | -0.588780 |
|                                                                |           |           |           | H | -2.267927 | -1.439831 | -2.610677 |

H<sup>+</sup>H[N<sub>α</sub>]-cggc(--0/-00/-00/--0/-0/--0) 313

|   |           |           |           |
|---|-----------|-----------|-----------|
| C | 2.146628  | -3.130494 | 0.924209  |
| C | 0.798160  | -3.411599 | 1.567370  |
| O | 0.110572  | -2.226714 | 1.973877  |
| C | 0.444868  | -1.771048 | 3.279748  |
| C | -0.349414 | -0.523632 | 3.591489  |
| O | 0.101532  | 0.549259  | 2.760534  |
| C | -0.403106 | 1.827501  | 3.149731  |
| C | 0.396415  | 2.914236  | 2.467888  |
| O | 0.208140  | 2.832253  | 1.061381  |
| C | 0.995844  | 3.773166  | 0.336769  |
| C | 0.850733  | 3.486259  | -1.146163 |
| O | 1.375900  | 2.208406  | -1.511945 |
| C | 2.759096  | 2.215414  | -1.892179 |
| C | 3.247518  | 0.795732  | -2.069753 |
| O | 3.321789  | 0.174845  | -0.785911 |
| C | 3.963831  | -1.096819 | -0.771579 |
| C | 3.036225  | -2.244638 | -1.156808 |
| O | 1.919109  | -2.377194 | -0.265620 |
| H | 2.622778  | -4.087495 | 0.673453  |
| H | 2.811590  | -2.590348 | 1.610120  |
| H | 0.931948  | -4.089273 | 2.419809  |
| H | 0.150864  | -3.903431 | 0.838425  |
| H | 1.516444  | -1.548122 | 3.359842  |
| H | 0.195923  | -2.541439 | 4.022610  |
| H | -0.193559 | -0.262786 | 4.645978  |
| H | -1.420537 | -0.704643 | 3.433519  |
| H | -0.303712 | 1.952236  | 4.235480  |
| H | -1.467958 | 1.909602  | 2.893430  |
| H | 1.460429  | 2.798261  | 2.713301  |
| H | 0.060477  | 3.890347  | 2.845955  |
| H | 2.046728  | 3.697994  | 0.646764  |
| H | 0.654323  | 4.797664  | 0.543004  |
| H | 1.337886  | 4.278099  | -1.726230 |
| H | -0.207860 | 3.476970  | -1.416354 |
| H | 3.362636  | 2.716695  | -1.126845 |
| H | 2.867494  | 2.756468  | -2.840242 |
| H | 4.245664  | 0.830134  | -2.527584 |
| H | 2.571115  | 0.248732  | -2.735540 |
| H | 4.339694  | -1.228345 | 0.246284  |
| H | 4.831124  | -1.099107 | -1.446313 |
| H | 3.602785  | -3.183546 | -1.183777 |
| H | 2.595711  | -2.080103 | -2.140482 |
| C | -4.553986 | 0.784284  | -0.002517 |
| C | -3.486294 | 0.237455  | -0.665069 |
| N | -3.909262 | -0.872457 | -1.368326 |
| C | -5.201533 | -0.996889 | -1.146050 |
| N | -5.635559 | -0.011408 | -0.323372 |
| C | -2.055949 | 0.689787  | -0.725349 |
| C | -1.047385 | -0.486961 | -0.734550 |
| H | -1.417758 | -1.294726 | -0.099456 |

|   |           |           |           |
|---|-----------|-----------|-----------|
| C | -0.764112 | -1.052933 | -2.148467 |
| O | 0.351906  | -1.007257 | -2.611883 |
| O | -1.786499 | -1.577793 | -2.790955 |
| N | 0.260958  | -0.065649 | -0.156926 |
| H | -4.645338 | 1.644221  | 0.639042  |
| H | -5.844919 | -1.763734 | -1.547179 |
| H | -6.583944 | 0.116979  | -0.003267 |
| H | -1.841341 | 1.330272  | 0.132479  |
| H | -1.893427 | 1.306916  | -1.616428 |
| H | 0.679448  | 0.731329  | -0.672579 |
| H | 0.931983  | -0.857938 | -0.201290 |
| H | 0.165170  | 0.203773  | 0.834798  |
| H | -2.659648 | -1.464436 | -2.298506 |

H<sup>+</sup>H[N<sub>α</sub>]-cggc(-00/+00/--0/--0/-00/--0) 1522

|   |           |           |           |
|---|-----------|-----------|-----------|
| C | -0.969452 | -1.114869 | 3.564834  |
| C | -0.810438 | 0.389631  | 3.483812  |
| O | 0.345985  | 0.694361  | 2.699136  |
| C | 0.858209  | 2.020739  | 2.860216  |
| C | 0.114717  | 3.072265  | 2.055132  |
| O | 0.303048  | 2.792362  | 0.673095  |
| C | -0.294827 | 3.731161  | -0.221255 |
| C | -1.772325 | 3.481560  | -0.467738 |
| O | -1.936038 | 2.201923  | -1.070459 |
| C | -3.280606 | 1.952415  | -1.496837 |
| C | -3.361236 | 0.610701  | -2.184610 |
| O | -3.140811 | -0.416806 | -1.224575 |
| C | -3.192888 | -1.720552 | -1.793071 |
| C | -2.928407 | -2.735860 | -0.706762 |
| O | -1.556400 | -2.645612 | -0.300937 |
| C | -1.191300 | -3.507063 | 0.774914  |
| C | -1.553922 | -2.951177 | 2.144545  |
| O | -1.014935 | -1.638234 | 2.244809  |
| H | -1.898830 | -1.335039 | 4.107410  |
| H | -0.132659 | -1.562601 | 4.116960  |
| H | -0.695361 | 0.791613  | 4.498246  |
| H | -1.706478 | 0.834664  | 3.033800  |
| H | 1.896676  | 1.980345  | 2.525677  |
| H | 0.848102  | 2.298755  | 3.921172  |
| H | 0.529145  | 4.059951  | 2.302897  |
| H | -0.951705 | 3.083228  | 2.315863  |
| H | 0.248019  | 3.633721  | -1.163787 |
| H | -0.155483 | 4.755208  | 0.148132  |
| H | -2.146806 | 4.265010  | -1.141012 |
| H | -2.354907 | 3.537566  | 0.462363  |
| H | -3.589527 | 2.734474  | -2.202055 |
| H | -3.954429 | 1.976434  | -0.630611 |
| H | -2.613871 | 0.547440  | -2.983400 |
| H | -4.362225 | 0.508090  | -2.627887 |
| H | -2.447698 | -1.815605 | -2.591556 |
| H | -4.189379 | -1.911595 | -2.216509 |
| H | -3.124936 | -3.743802 | -1.092925 |

|   |           |           |           |
|---|-----------|-----------|-----------|
| H | -3.593180 | -2.546541 | 0.143573  |
| H | -0.107273 | -3.622513 | 0.707428  |
| H | -1.644823 | -4.497597 | 0.645452  |
| H | -1.123233 | -3.613147 | 2.908719  |
| H | -2.640075 | -2.919673 | 2.301987  |
| C | 4.489003  | -0.967072 | 0.588754  |
| C | 3.478638  | -0.801977 | -0.322207 |
| N | 4.001694  | -0.288602 | -1.491321 |
| C | 5.297688  | -0.149213 | -1.302687 |
| N | 5.637733  | -0.551217 | -0.053949 |
| C | 2.015185  | -1.113339 | -0.200202 |
| C | 1.104649  | -0.042518 | -0.852431 |
| H | 1.527236  | 0.949204  | -0.675863 |
| C | 0.874031  | -0.222993 | -2.372958 |
| O | -0.248230 | -0.356160 | -2.802460 |
| O | 1.940161  | -0.203052 | -3.144511 |
| N | -0.233611 | -0.046693 | -0.190652 |
| H | 4.498631  | -1.335969 | 1.600344  |
| H | 6.007850  | 0.229010  | -2.020664 |
| H | 6.568773  | -0.547996 | 0.335372  |
| H | 1.759009  | -1.183268 | 0.859614  |
| H | 1.797626  | -2.091229 | -0.644945 |
| H | -0.118813 | 0.138663  | 0.816684  |
| H | -0.730399 | -0.950928 | -0.300675 |
| H | -0.848248 | 0.687824  | -0.582750 |
| H | 2.806001  | -0.149410 | -2.627078 |

H<sup>+</sup>H[N<sub>α</sub>]-cggc(++0/+0+/-00/-00/+0+) 1548

|   |           |           |           |
|---|-----------|-----------|-----------|
| C | 3.883203  | -0.589392 | -1.671985 |
| C | 2.732318  | -0.721045 | -2.665468 |
| O | 1.713251  | 0.277115  | -2.480860 |
| C | 2.068246  | 1.578473  | -2.946618 |
| C | 0.931243  | 2.537705  | -2.681204 |
| O | 0.747409  | 2.649230  | -1.274312 |
| C | -0.161749 | 3.668573  | -0.892251 |
| C | -0.268340 | 3.682537  | 0.615362  |
| O | -0.864087 | 2.456762  | 1.054379  |
| C | -1.160153 | 2.410023  | 2.455674  |
| C | -0.005078 | 1.896845  | 3.295906  |
| O | 0.234071  | 0.542909  | 2.938845  |
| C | 1.284301  | -0.072852 | 3.678972  |
| C | 1.391574  | -1.518822 | 3.235151  |
| O | 1.798791  | -1.636772 | 1.868894  |
| C | 3.181515  | -1.973029 | 1.684681  |
| C | 3.502718  | -2.030792 | 0.209708  |
| O | 3.466912  | -0.705411 | -0.315195 |
| H | 4.365492  | 0.387257  | -1.758193 |
| H | 4.640841  | -1.346831 | -1.913508 |
| H | 2.221106  | -1.674835 | -2.543176 |
| H | 3.123190  | -0.660018 | -3.689531 |
| H | 2.265566  | 1.543244  | -4.026131 |
| H | 2.967993  | 1.942395  | -2.438957 |

|   |           |           |           |
|---|-----------|-----------|-----------|
| H | 0.007140  | 2.185224  | -3.160217 |
| H | 1.189448  | 3.514330  | -3.113210 |
| H | -1.151046 | 3.493061  | -1.338887 |
| H | 0.194475  | 4.651276  | -1.232288 |
| H | -0.896822 | 4.528025  | 0.922498  |
| H | 0.727790  | 3.809527  | 1.055245  |
| H | -2.010698 | 1.733368  | 2.564281  |
| H | -1.464164 | 3.402142  | 2.808990  |
| H | -0.279814 | 1.972291  | 4.358032  |
| H | 0.900816  | 2.499536  | 3.140465  |
| H | 1.060226  | -0.041336 | 4.754791  |
| H | 2.230003  | 0.459961  | 3.509038  |
| H | 0.413789  | -2.000255 | 3.322743  |
| H | 2.089753  | -2.053485 | 3.887455  |
| H | 3.374681  | -2.955662 | 2.132062  |
| H | 3.820756  | -1.227946 | 2.173323  |
| H | 2.785812  | -2.679512 | -0.304407 |
| H | 4.510952  | -2.452656 | 0.095522  |
| C | -4.594082 | 0.280460  | -0.643057 |
| C | -3.475315 | -0.506955 | -0.725321 |
| N | -3.831971 | -1.822779 | -0.511506 |
| C | -5.133763 | -1.840368 | -0.311093 |
| N | -5.637827 | -0.584883 | -0.384201 |
| C | -2.053280 | -0.122058 | -1.018944 |
| C | -1.016899 | -0.930978 | -0.199383 |
| H | -1.404639 | -1.095744 | 0.808912  |
| C | -0.645750 | -2.303161 | -0.815721 |
| O | 0.495691  | -2.530783 | -1.144883 |
| O | -1.615689 | -3.181345 | -0.942700 |
| N | 0.246095  | -0.148723 | -0.044238 |
| H | -4.741594 | 1.341966  | -0.746894 |
| H | -5.735080 | -2.713530 | -0.114119 |
| H | -6.607481 | -0.329421 | -0.270226 |
| H | -1.925645 | 0.934969  | -0.777956 |
| H | -1.838622 | -0.238998 | -2.087297 |
| H | 0.040347  | 0.773162  | 0.367773  |
| H | 0.741569  | 0.000419  | -0.946646 |
| H | 0.899981  | -0.646679 | 0.590140  |
| H | -2.525244 | -2.805190 | -0.709800 |

H<sup>+</sup>H[N<sub>α</sub>]-cggc(++0/+0+/-00/-00/+0+) 3544

|   |           |           |           |
|---|-----------|-----------|-----------|
| C | -0.197239 | 3.558681  | 1.156193  |
| C | -0.060659 | 3.783014  | -0.332141 |
| O | 0.831450  | 2.813651  | -0.857485 |
| C | 1.026477  | 2.910303  | -2.263922 |
| C | 2.155608  | 1.988058  | -2.661360 |
| O | 1.783605  | 0.636268  | -2.396496 |
| C | 2.807219  | -0.331224 | -2.688225 |
| C | 3.910542  | -0.366700 | -1.634956 |
| O | 3.435486  | -0.701434 | -0.334819 |
| C | 3.455996  | -2.094298 | -0.029175 |
| C | 3.088693  | -2.270781 | 1.425429  |

|   |           |           |           |                                                      |                               |
|---|-----------|-----------|-----------|------------------------------------------------------|-------------------------------|
| O | 1.703434  | -1.949590 | 1.616539  |                                                      |                               |
| C | 1.254288  | -2.034839 | 2.972089  | H <sup>+</sup> H[Na]-cggc(++0/+0/+00/--0/-00/+0+) 16 |                               |
| C | 1.170034  | -0.673874 | 3.635616  | C                                                    | 3.456230 -2.093483 -0.032373  |
| O | 0.159530  | 0.080975  | 2.973206  | C                                                    | 3.089631 -2.271634 1.422208   |
| C | -0.051137 | 1.372056  | 3.526886  | O                                                    | 1.704329 -1.951148 1.614220   |
| C | -1.171657 | 2.041877  | 2.752700  | C                                                    | 1.255855 -2.037623 2.969902   |
| O | -0.839237 | 2.299096  | 1.382991  | C                                                    | 1.172171 -0.677281 3.634786   |
| H | -0.805341 | 4.364462  | 1.586402  | O                                                    | 0.161337 0.078299 2.973710    |
| H | 0.793321  | 3.579163  | 1.625752  | C                                                    | -0.048639 1.369011 3.528499   |
| H | 0.326028  | 4.797336  | -0.504900 | C                                                    | -1.169660 2.039574 2.755686   |
| H | -1.044701 | 3.707594  | -0.816720 | O                                                    | -0.838265 2.297717 1.385899   |
| H | 1.298465  | 3.937060  | -2.544746 | C                                                    | -0.196432 3.557462 1.159478   |
| H | 0.102763  | 2.643324  | -2.796106 | C                                                    | -0.061324 3.782987 -0.328808  |
| H | 3.055169  | 2.261869  | -2.099624 | O                                                    | 0.830445 2.814196 -0.855794   |
| H | 2.361441  | 2.111244  | -3.732812 | C                                                    | 1.023724 2.911720 -2.262409   |
| H | 3.246138  | -0.115410 | -3.671047 | C                                                    | 2.152811 1.990239 -2.661754   |
| H | 2.288542  | -1.287354 | -2.741086 | O                                                    | 1.781899 0.638138 -2.396930   |
| H | 4.390601  | 0.610125  | -1.538344 | C                                                    | 2.806017 -0.328578 -2.689487  |
| H | 4.682362  | -1.076346 | -1.961497 | C                                                    | 3.909561 -0.363998 -1.636452  |
| H | 4.467174  | -2.497326 | -0.179182 | O                                                    | 3.435050 -0.700294 -0.336514  |
| H | 2.754814  | -2.648560 | -0.662011 | H                                                    | 2.754962 -2.647323 -0.665481  |
| H | 3.717186  | -1.621837 | 2.047042  | H                                                    | 4.467492 -2.495955 -0.183276  |
| H | 3.259222  | -3.314756 | 1.715404  | H                                                    | 3.718143 -1.623091 2.044218   |
| H | 1.915674  | -2.687738 | 3.551125  | H                                                    | 3.260659 -3.315841 1.711055   |
| H | 0.261720  | -2.492673 | 2.953250  | H                                                    | 1.917400 -2.691223 3.547966   |
| H | 2.134002  | -0.149944 | 3.577826  | H                                                    | 0.263190 -2.495242 2.951091   |
| H | 0.912877  | -0.804253 | 4.696473  | H                                                    | 2.136160 -0.153404 3.576878   |
| H | 0.874322  | 1.963002  | 3.481402  | H                                                    | 0.915664 -0.808613 4.695683   |
| H | -0.348447 | 1.294595  | 4.582778  | H                                                    | 0.876889 1.959826 3.482673    |
| H | -1.460246 | 2.974628  | 3.250979  | H                                                    | -0.345104 1.290848 4.584576   |
| H | -2.040629 | 1.380343  | 2.735783  | H                                                    | -1.457695 2.972019 3.254855   |
| C | -4.581982 | 0.424958  | -0.640082 | H                                                    | -2.038758 1.378200 2.738986   |
| C | -3.467723 | -0.350543 | -0.828324 | H                                                    | 0.794581 3.577544 1.628094    |
| N | -3.834118 | -1.680988 | -0.807695 | H                                                    | -0.804087 4.362919 1.590922   |
| C | -5.137310 | -1.717544 | -0.619011 | H                                                    | 0.324998 4.797511 -0.501182   |
| N | -5.632854 | -0.460981 | -0.513984 | H                                                    | -1.045834 3.707747 -0.812463  |
| C | -2.041287 | 0.062854  | -1.054356 | H                                                    | 1.294869 3.938760 -2.543011   |
| C | -1.016594 | -0.872067 | -0.364457 | H                                                    | 0.099482 2.644598 -2.793605   |
| H | -1.412003 | -1.187085 | 0.604198  | H                                                    | 3.053002 2.264303 -2.101151   |
| C | -0.652997 | -2.134701 | -1.185426 | H                                                    | 2.357120 2.113972 -3.733432   |
| O | -1.628280 | -2.977664 | -1.443940 | H                                                    | 3.244573 -0.111943 -3.672285  |
| O | 0.486505  | -2.314051 | -1.549155 | H                                                    | 2.287912 -1.284997 -2.742802  |
| N | 0.252103  | -0.136011 | -0.083001 | H                                                    | 4.388737 0.613179 -1.539042   |
| H | -4.722055 | 1.491463  | -0.592181 | H                                                    | 4.681977 -1.072662 -1.963725  |
| H | -5.745489 | -2.605523 | -0.552538 | C                                                    | -4.582105 0.425515 -0.638479  |
| H | -6.601572 | -0.217570 | -0.369747 | C                                                    | -3.467917 -0.349892 -0.827519 |
| H | -1.906174 | 1.069503  | -0.653561 | N                                                    | -3.834357 -1.680340 -0.807761 |
| H | -1.822355 | 0.109371  | -2.127201 | C                                                    | -5.137507 -1.716983 -0.618818 |
| H | 0.762362  | 0.135980  | -0.947160 | N                                                    | -5.632981 -0.460476 -0.512791 |
| H | 0.889682  | -0.731104 | 0.479954  | C                                                    | -2.041517 0.063604 -1.053587  |
| H | 0.052065  | 0.718272  | 0.457136  | C                                                    | -1.016696 -0.871920 -0.364696 |
| H | -2.534395 | -2.635388 | -1.153861 | H                                                    | -1.411873 -1.187715 0.603799  |

|   |           |           |           |
|---|-----------|-----------|-----------|
| C | -0.653380 | -2.133914 | -1.186784 |
| O | -1.628758 | -2.976667 | -1.445638 |
| O | 0.486002  | -2.312998 | -1.551016 |
| N | 0.252110  | -0.136156 | -0.083004 |
| H | -4.722132 | 1.491989  | -0.589795 |
| H | -5.745707 | -2.604986 | -0.552847 |
| H | -6.601659 | -0.217134 | -0.368170 |
| H | -1.906236 | 1.069944  | -0.652066 |
| H | -1.822857 | 0.110937  | -2.126453 |
| H | 0.889989  | -0.731841 | 0.478982  |
| H | 0.052335  | 0.717525  | 0.458180  |
| H | 0.761930  | 0.136773  | -0.947123 |
| H | -2.534766 | -2.634588 | -1.155012 |

H<sup>+</sup>H[N<sub>α</sub>]-cggc(++0/+00/--0/-00/+00/--+) 9660

|   |           |           |           |
|---|-----------|-----------|-----------|
| C | -1.709971 | -2.869005 | 1.844636  |
| C | -1.391986 | -3.499919 | 0.501280  |
| O | -1.312442 | -2.543398 | -0.560611 |
| C | -2.364232 | -2.543883 | -1.540864 |
| C | -3.605898 | -1.785328 | -1.084269 |
| O | -3.344287 | -0.420818 | -0.772755 |
| C | -3.468879 | 0.478119  | -1.876834 |
| C | -3.345150 | 1.897432  | -1.371333 |
| O | -1.993839 | 2.170179  | -0.983725 |
| C | -1.819484 | 3.474862  | -0.438798 |
| C | -0.339176 | 3.731131  | -0.205562 |
| O | 0.266385  | 2.820038  | 0.712558  |
| C | 0.039927  | 3.117240  | 2.086035  |
| C | 0.626231  | 2.011055  | 2.935149  |
| O | -0.095130 | 0.801636  | 2.688021  |
| C | 0.135331  | -0.230761 | 3.648159  |
| C | -0.887935 | -1.325891 | 3.447921  |
| O | -0.676363 | -1.949614 | 2.187077  |
| H | -1.774981 | -3.667638 | 2.598172  |
| H | -2.674494 | -2.345940 | 1.816100  |
| H | -2.147572 | -4.259512 | 0.274764  |
| H | -0.419398 | -3.997493 | 0.556059  |
| H | -2.633360 | -3.576460 | -1.793759 |
| H | -1.926296 | -2.076144 | -2.423278 |
| H | -4.018103 | -2.232220 | -0.175442 |
| H | -4.374675 | -1.865992 | -1.864849 |
| H | -4.459888 | 0.365549  | -2.337195 |
| H | -2.701784 | 0.282796  | -2.633615 |
| H | -4.014153 | 2.048210  | -0.514822 |
| H | -3.638085 | 2.588228  | -2.172357 |
| H | -2.400219 | 3.572164  | 0.488187  |
| H | -2.190642 | 4.230322  | -1.145121 |
| H | -0.201676 | 4.766376  | 0.132489  |
| H | 0.201496  | 3.609041  | -1.146454 |
| H | -1.032146 | 3.202323  | 2.299605  |
| H | 0.523277  | 4.067360  | 2.352693  |
| H | 0.531672  | 2.291374  | 3.991714  |

|   |           |           |           |
|---|-----------|-----------|-----------|
| H | 1.691352  | 1.872660  | 2.708054  |
| H | 0.025616  | 0.172938  | 4.662576  |
| H | 1.153845  | -0.628477 | 3.545527  |
| H | -1.896768 | -0.894695 | 3.492772  |
| H | -0.790574 | -2.060227 | 4.259836  |
| C | 4.496000  | -1.044456 | 0.490947  |
| C | 3.468804  | -0.764324 | -0.371990 |
| N | 3.976554  | -0.135079 | -1.490646 |
| C | 5.278883  | -0.038605 | -1.318667 |
| N | 5.638268  | -0.579389 | -0.129479 |
| C | 2.002972  | -1.067075 | -0.254056 |
| C | 1.099970  | 0.057844  | -0.822172 |
| H | 1.541262  | 1.032140  | -0.601479 |
| C | 0.852827  | -0.048768 | -2.347005 |
| O | 1.907730  | 0.044029  | -3.127892 |
| O | -0.269960 | -0.198421 | -2.773073 |
| N | -0.231261 | 0.032161  | -0.152767 |
| H | 4.522438  | -1.525962 | 1.453711  |
| H | 5.980343  | 0.403511  | -2.008125 |
| H | 6.577438  | -0.633758 | 0.235757  |
| H | 1.751816  | -1.220191 | 0.797818  |
| H | 1.765318  | -2.007935 | -0.762525 |
| H | -0.145281 | 0.234200  | 0.856127  |
| H | -0.689447 | -0.893742 | -0.266331 |
| H | -0.863035 | 0.751856  | -0.545961 |
| H | 2.775607  | 0.084443  | -2.612660 |

H<sup>+</sup>H[N<sub>α</sub>]-cggc(+00/-+0/-00/--0/-00/-0+) 19

|   |           |           |           |
|---|-----------|-----------|-----------|
| C | -0.441315 | -1.309850 | 3.355023  |
| C | -0.488862 | -2.685280 | 2.723763  |
| O | -0.720477 | -2.541462 | 1.328933  |
| C | -1.281089 | -3.687827 | 0.699186  |
| C | -1.117622 | -3.526964 | -0.804849 |
| O | -1.604787 | -2.282927 | -1.299420 |
| C | -3.021230 | -2.219845 | -1.503037 |
| C | -3.374165 | -0.886062 | -2.118004 |
| O | -3.192382 | 0.141182  | -1.148617 |
| C | -3.459059 | 1.436065  | -1.676059 |
| C | -3.177158 | 2.474001  | -0.615294 |
| O | -1.765717 | 2.521913  | -0.371128 |
| C | -1.326500 | 3.592280  | 0.466030  |
| C | -1.243814 | 3.204910  | 1.930313  |
| O | -0.264934 | 2.179605  | 2.066702  |
| C | -0.053033 | 1.769169  | 3.408904  |
| C | 0.966051  | 0.643117  | 3.415042  |
| O | 0.552939  | -0.521510 | 2.695547  |
| H | -0.195076 | -1.413712 | 4.419693  |
| H | -1.424638 | -0.831704 | 3.271279  |
| H | -1.299713 | -3.252085 | 3.200393  |
| H | 0.452879  | -3.223772 | 2.893328  |
| H | -2.335080 | -3.791817 | 0.989048  |
| H | -0.756540 | -4.603429 | 1.005664  |





H<sup>+</sup>H[N<sub>α</sub>]-cggc(++0/0+0/+00/-00/+0+/-+00) 1592

|   |           |           |           |
|---|-----------|-----------|-----------|
| C | 3.048348  | -2.654517 | -0.264769 |
| C | 3.394666  | -1.632356 | -1.322948 |
| O | 3.325686  | -0.331012 | -0.738845 |
| C | 3.766083  | 0.724384  | -1.587717 |
| C | 2.661063  | 1.283225  | -2.478764 |
| O | 1.579332  | 1.870815  | -1.737166 |
| C | 1.822095  | 3.179775  | -1.224597 |
| C | 0.510881  | 3.747233  | -0.705923 |
| O | -0.040398 | 3.007182  | 0.383908  |
| C | 0.472675  | 3.357660  | 1.664347  |
| C | -0.227484 | 2.529373  | 2.717418  |
| O | 0.158062  | 1.160797  | 2.579335  |
| C | -0.315782 | 0.316089  | 3.632446  |
| C | 0.552354  | -0.918498 | 3.716218  |
| O | 0.434143  | -1.667793 | 2.515196  |
| C | 1.307845  | -2.791678 | 2.472509  |
| C | 1.211319  | -3.424100 | 1.097396  |
| O | 1.656988  | -2.548663 | 0.059592  |
| H | 3.664521  | -2.486340 | 0.626443  |
| H | 3.253277  | -3.659645 | -0.653529 |
| H | 2.702490  | -1.723414 | -2.166825 |
| H | 4.416101  | -1.830702 | -1.675268 |
| H | 4.594705  | 0.387628  | -2.225326 |
| H | 4.160849  | 1.499558  | -0.925925 |
| H | 2.200118  | 0.492474  | -3.070554 |
| H | 3.083570  | 2.030089  | -3.162958 |
| H | 2.190029  | 3.830952  | -2.028774 |
| H | 2.583427  | 3.156406  | -0.435191 |
| H | -0.235256 | 3.710899  | -1.502269 |
| H | 0.656744  | 4.797127  | -0.421122 |
| H | 0.285228  | 4.420946  | 1.868344  |
| H | 1.554032  | 3.180660  | 1.721904  |
| H | -1.316209 | 2.633326  | 2.619987  |
| H | 0.066044  | 2.896702  | 3.709062  |
| H | -1.364282 | 0.044200  | 3.455160  |
| H | -0.255663 | 0.845790  | 4.591006  |
| H | 0.231567  | -1.519375 | 4.579333  |
| H | 1.598030  | -0.621625 | 3.873206  |
| H | 1.019743  | -3.531432 | 3.233138  |
| H | 2.337557  | -2.472516 | 2.683504  |
| H | 0.168391  | -3.663098 | 0.875410  |
| H | 1.782203  | -4.359308 | 1.077792  |
| C | -4.610698 | 0.683164  | 0.011614  |
| C | -3.533216 | 0.115561  | -0.616526 |
| N | -3.928453 | -1.062755 | -1.218423 |
| C | -5.214111 | -1.206741 | -0.970021 |
| N | -5.670094 | -0.169143 | -0.227393 |
| C | -2.118193 | 0.604913  | -0.730844 |
| C | -1.082259 | -0.546468 | -0.677653 |
| H | -1.437557 | -1.323833 | 0.002444  |

|   |           |           |           |
|---|-----------|-----------|-----------|
| C | -0.806062 | -1.176792 | -2.065282 |
| O | 0.287137  | -1.081566 | -2.572696 |
| O | -1.813208 | -1.802272 | -2.638212 |
| N | 0.226046  | -0.073735 | -0.139104 |
| H | -4.721795 | 1.590490  | 0.580651  |
| H | -5.837596 | -2.023445 | -1.297365 |
| H | -6.618767 | -0.042715 | 0.092630  |
| H | -1.906911 | 1.311580  | 0.073064  |
| H | -1.984757 | 1.163342  | -1.664214 |
| H | 0.670845  | 0.631955  | -0.758522 |
| H | 0.876955  | -0.878005 | -0.061414 |
| H | 0.128991  | 0.341083  | 0.801276  |
| H | -2.678212 | -1.691576 | -2.130980 |

H<sup>+</sup>H[N<sub>α</sub>]-cggc(+0+/-+00/-00/+00/-00/+00) 181

|   |           |           |           |
|---|-----------|-----------|-----------|
| C | 0.752721  | 3.064257  | 2.114175  |
| C | 1.013471  | 3.622355  | 0.726215  |
| O | 0.164314  | 3.087282  | -0.281827 |
| C | -1.110264 | 3.718585  | -0.383531 |
| C | -1.823993 | 3.211422  | -1.617420 |
| O | -2.125463 | 1.817660  | -1.500449 |
| C | -3.451178 | 1.476779  | -1.934215 |
| C | -3.625645 | -0.022378 | -1.962594 |
| O | -3.463965 | -0.539863 | -0.647946 |
| C | -3.653967 | -1.949175 | -0.584346 |
| C | -3.379438 | -2.413371 | 0.825051  |
| O | -1.996740 | -2.216766 | 1.150145  |
| C | -1.699931 | -2.632677 | 2.480456  |
| C | -0.264311 | -2.304562 | 2.819564  |
| O | -0.104115 | -0.891677 | 2.774473  |
| C | 1.097744  | -0.404840 | 3.350667  |
| C | 1.005105  | 1.101533  | 3.425157  |
| O | 0.959380  | 1.650115  | 2.105066  |
| H | -0.265581 | 3.287178  | 2.458763  |
| H | 1.453540  | 3.540865  | 2.813152  |
| H | 2.034540  | 3.374433  | 0.425826  |
| H | 0.931020  | 4.716684  | 0.760184  |
| H | -0.980960 | 4.806123  | -0.475216 |
| H | -1.720632 | 3.516163  | 0.505995  |
| H | -1.206607 | 3.374657  | -2.507901 |
| H | -2.748757 | 3.787370  | -1.730998 |
| H | -3.622537 | 1.864441  | -2.946048 |
| H | -4.179711 | 1.933661  | -1.253411 |
| H | -4.636878 | -0.238037 | -2.337845 |
| H | -2.897725 | -0.482273 | -2.639138 |
| H | -2.986523 | -2.453453 | -1.290876 |
| H | -4.692903 | -2.205842 | -0.837268 |
| H | -4.001919 | -1.854803 | 1.535354  |
| H | -3.626612 | -3.479726 | 0.906584  |
| H | -1.854462 | -3.715767 | 2.578394  |
| H | -2.366766 | -2.121972 | 3.186913  |
| H | -0.048145 | -2.684137 | 3.827230  |

|   |           |           |           |
|---|-----------|-----------|-----------|
| H | 0.424463  | -2.796145 | 2.117689  |
| H | 1.970826  | -0.709919 | 2.755511  |
| H | 1.226821  | -0.799292 | 4.367998  |
| H | 0.100495  | 1.383704  | 3.978161  |
| H | 1.878712  | 1.496513  | 3.959999  |
| C | 4.419862  | 0.382240  | -0.950561 |
| C | 3.235532  | -0.267283 | -1.182484 |
| N | 3.494625  | -1.597108 | -1.449507 |
| C | 4.801526  | -1.753131 | -1.389989 |
| N | 5.402743  | -0.576665 | -1.090713 |
| C | 1.833600  | 0.273463  | -1.202008 |
| C | 0.789992  | -0.745175 | -0.681148 |
| H | 1.230399  | -1.329535 | 0.128932  |
| C | 0.287898  | -1.713347 | -1.777418 |
| O | -0.863355 | -1.676606 | -2.141909 |
| O | 1.172763  | -2.553898 | -2.269805 |
| N | -0.396310 | -0.046556 | -0.094086 |
| H | 4.649732  | 1.407290  | -0.714743 |
| H | 5.340223  | -2.673145 | -1.551958 |
| H | 6.396218  | -0.428342 | -0.993015 |
| H | 1.557655  | 0.585351  | -2.215444 |
| H | 1.784959  | 1.168511  | -0.582989 |
| H | -1.072180 | -0.734488 | 0.286871  |
| H | -0.914015 | 0.540218  | -0.773911 |
| H | -0.088738 | 0.556272  | 0.683831  |
| H | 2.109768  | -2.368389 | -1.941896 |

H<sup>+</sup>H[N<sub>α</sub>]-cggc(+0+/-00/-00/+0+/-00) 8251

|   |           |           |           |
|---|-----------|-----------|-----------|
| C | -0.084586 | 3.501065  | 1.298881  |
| C | -0.226210 | 2.729210  | 2.590997  |
| O | -0.719673 | 1.412830  | 2.321527  |
| C | -0.890849 | 0.642462  | 3.513247  |
| C | -1.436626 | -0.732673 | 3.164239  |
| O | -0.576640 | -1.511604 | 2.338719  |
| C | 0.525599  | -2.109436 | 3.019307  |
| C | 1.294065  | -2.991033 | 2.058600  |
| O | 1.836392  | -2.204625 | 0.996206  |
| C | 3.092350  | -2.682643 | 0.493238  |
| C | 3.480670  | -1.912778 | -0.748988 |
| O | 3.626959  | -0.536727 | -0.409180 |
| C | 4.114610  | 0.290479  | -1.457754 |
| C | 3.026682  | 0.782247  | -2.411090 |
| O | 1.994427  | 1.543621  | -1.760535 |
| C | 2.373614  | 2.864128  | -1.374987 |
| C | 1.199639  | 3.550143  | -0.713549 |
| O | 0.894984  | 2.863906  | 0.496066  |
| H | 0.218949  | 4.529808  | 1.538734  |
| H | -1.048597 | 3.549963  | 0.771288  |
| H | -0.923989 | 3.258756  | 3.252691  |
| H | 0.747684  | 2.664314  | 3.091871  |
| H | -1.607513 | 1.141449  | 4.180016  |
| H | 0.065524  | 0.571603  | 4.047018  |

|   |           |           |           |
|---|-----------|-----------|-----------|
| H | -2.368755 | -0.623087 | 2.605095  |
| H | -1.662776 | -1.268081 | 4.096072  |
| H | 0.161932  | -2.726104 | 3.853015  |
| H | 1.197706  | -1.341746 | 3.421730  |
| H | 0.645989  | -3.773150 | 1.645349  |
| H | 2.103022  | -3.473853 | 2.619142  |
| H | 3.011759  | -3.745682 | 0.233892  |
| H | 3.855111  | -2.563722 | 1.271983  |
| H | 2.722802  | -2.048984 | -1.526121 |
| H | 4.435776  | -2.318067 | -1.113108 |
| H | 4.876133  | -0.237112 | -2.049079 |
| H | 4.612106  | 1.129660  | -0.966210 |
| H | 2.506901  | -0.054039 | -2.876732 |
| H | 3.486321  | 1.390062  | -3.201472 |
| H | 2.671930  | 3.437285  | -2.262676 |
| H | 3.215232  | 2.839730  | -0.674606 |
| H | 0.327897  | 3.553145  | -1.382748 |
| H | 1.473803  | 4.592932  | -0.503213 |
| C | -4.479502 | 0.828906  | -0.641809 |
| C | -3.362202 | 0.172199  | -1.087912 |
| N | -3.740495 | -1.022534 | -1.665443 |
| C | -5.053123 | -1.091491 | -1.581094 |
| N | -5.543802 | 0.012752  | -0.968185 |
| C | -1.920492 | 0.591774  | -1.039423 |
| C | -0.949582 | -0.578526 | -0.741955 |
| H | -1.403384 | -1.255149 | -0.015087 |
| C | -0.541024 | -1.398455 | -1.988616 |
| O | 0.622641  | -1.468321 | -2.314547 |
| O | -1.502205 | -2.010090 | -2.643781 |
| N | 0.300272  | -0.067248 | -0.104059 |
| H | -4.614095 | 1.774728  | -0.145077 |
| H | -5.671773 | -1.899040 | -1.938837 |
| H | -6.517801 | 0.204495  | -0.786300 |
| H | -1.807008 | 1.338679  | -0.251264 |
| H | -1.631959 | 1.073079  | -1.980830 |
| H | 0.897830  | -0.854440 | 0.214569  |
| H | 0.069196  | 0.492631  | 0.729839  |
| H | 0.874382  | 0.519844  | -0.742018 |
| H | -2.425441 | -1.786070 | -2.296881 |

H<sup>+</sup>H[N<sub>α</sub>]-cggc(+0+/-00/-00/+0+/-00) 136

|   |           |           |           |
|---|-----------|-----------|-----------|
| C | -0.033350 | -2.299345 | 2.911435  |
| C | -0.945706 | -1.141410 | 3.277561  |
| O | -0.377203 | 0.074760  | 2.787233  |
| C | -1.003442 | 1.250363  | 3.306026  |
| C | -0.164436 | 2.454021  | 2.919177  |
| O | -0.114239 | 2.657886  | 1.508494  |
| C | -1.058744 | 3.601956  | 1.005686  |
| C | -0.887031 | 3.690454  | -0.498810 |
| O | -1.298163 | 2.497128  | -1.172490 |
| C | -2.641725 | 2.537555  | -1.674890 |
| C | -2.970138 | 1.231562  | -2.357392 |

|   |           |           |           |                                                   |                               |
|---|-----------|-----------|-----------|---------------------------------------------------|-------------------------------|
| O | -3.061750 | 0.201800  | -1.379031 |                                                   |                               |
| C | -3.387166 | -1.062187 | -1.950076 | H <sup>+</sup> H[Na]-cggc(-0/--0/-00/+00/-00/+00) | 12883                         |
| C | -3.414106 | -2.107046 | -0.860416 | C                                                 | 3.665079 0.019769 -1.706725   |
| O | -2.090987 | -2.300115 | -0.351516 | C                                                 | 3.448186 1.506935 -1.864961   |
| C | -1.992253 | -3.370366 | 0.580535  | O                                                 | 2.095206 1.865811 -1.551044   |
| C | -0.529186 | -3.600389 | 0.917525  | C                                                 | 1.934153 3.276844 -1.429289   |
| O | 0.117666  | -2.471280 | 1.503496  | C                                                 | 0.543518 3.608714 -0.936730   |
| H | -0.418414 | -3.214437 | 3.376354  | O                                                 | 0.365772 3.024520 0.348171    |
| H | 0.963161  | -2.106779 | 3.319544  | C                                                 | -0.750437 3.509429 1.074415   |
| H | -1.026415 | -1.095794 | 4.372125  | C                                                 | -0.760320 2.842856 2.431349   |
| H | -1.954375 | -1.275537 | 2.866107  | O                                                 | -0.928846 1.430020 2.282844   |
| H | -1.056342 | 1.189590  | 4.401167  | C                                                 | -0.911790 0.759207 3.546157   |
| H | -2.028192 | 1.334927  | 2.919379  | C                                                 | -0.940464 -0.739246 3.348638  |
| H | 0.864298  | 2.292619  | 3.251179  | O                                                 | 0.250955 -1.135051 2.685633   |
| H | -0.548491 | 3.346087  | 3.427923  | C                                                 | 0.477387 -2.540310 2.668097   |
| H | -0.871842 | 4.589991  | 1.448585  | C                                                 | 1.808176 -2.806203 2.000269   |
| H | -2.084625 | 3.302339  | 1.258273  | O                                                 | 1.727123 -2.412319 0.630015   |
| H | -1.444879 | 4.550966  | -0.883656 | C                                                 | 2.902834 -2.681517 -0.153792  |
| H | 0.169301  | 3.841227  | -0.734140 | C                                                 | 3.982051 -1.619035 0.028941   |
| H | -2.728680 | 3.353371  | -2.402828 | O                                                 | 3.542616 -0.312739 -0.322882  |
| H | -3.349350 | 2.719205  | -0.856818 | H                                                 | 4.680654 -0.208754 -2.058687  |
| H | -3.930910 | 1.345860  | -2.879458 | H                                                 | 2.947370 -0.540086 -2.312522  |
| H | -2.198259 | 0.983751  | -3.095597 | H                                                 | 3.672695 1.795905 -2.899986   |
| H | -2.646000 | -1.332552 | -2.710649 | H                                                 | 4.127109 2.047090 -1.194303   |
| H | -4.379832 | -1.020887 | -2.420603 | H                                                 | 2.095639 3.762312 -2.401601   |
| H | -4.085691 | -1.799007 | -0.048306 | H                                                 | 2.672075 3.670045 -0.719025   |
| H | -3.786583 | -3.049409 | -1.281980 | H                                                 | -0.220314 3.239307 -1.635723  |
| H | -2.393922 | -4.292925 | 0.138243  | H                                                 | 0.449627 4.701646 -0.881027   |
| H | -2.584365 | -3.148072 | 1.479605  | H                                                 | -1.687835 3.306630 0.535638   |
| H | -0.442637 | -4.475671 | 1.573125  | H                                                 | -0.678263 4.596615 1.218360   |
| H | 0.020066  | -3.813176 | -0.002372 | H                                                 | -1.581401 3.256759 3.031844   |
| C | 4.542089  | 0.821715  | 0.421097  | H                                                 | 0.185520 3.047611 2.947807    |
| C | 3.543273  | 0.396768  | -0.414944 | H                                                 | -1.784491 1.062201 4.140106   |
| N | 4.047374  | -0.558499 | -1.274438 | H                                                 | -0.004124 1.035689 4.096622   |
| C | 5.321269  | -0.708874 | -0.975555 | H                                                 | -1.825329 -1.039495 2.768589  |
| N | 5.665121  | 0.111298  | 0.046952  | H                                                 | -1.009090 -1.213760 4.337323  |
| C | 2.110263  | 0.833609  | -0.503244 | H                                                 | -0.328402 -3.055132 2.126237  |
| C | 1.133190  | -0.344149 | -0.745395 | H                                                 | 0.507925 -2.935011 3.692885   |
| H | 1.474332  | -1.223871 | -0.195639 | H                                                 | 2.033093 -3.878452 2.063832   |
| C | 0.948557  | -0.722388 | -2.234932 | H                                                 | 2.596594 -2.251424 2.521740   |
| O | -0.148642 | -0.673301 | -2.742089 | H                                                 | 2.556680 -2.711108 -1.186803  |
| O | 2.025069  | -1.103269 | -2.888860 | H                                                 | 3.303594 -3.668562 0.108286   |
| N | -0.218455 | -0.016846 | -0.200199 | H                                                 | 4.864746 -1.906460 -0.558844  |
| H | 4.559879  | 1.545034  | 1.218450  | H                                                 | 4.291900 -1.557492 1.075154   |
| H | 6.012848  | -1.381122 | -1.457884 | C                                                 | -4.482160 0.423475 -0.597345  |
| H | 6.582413  | 0.188441  | 0.460354  | C                                                 | -3.311319 -0.128590 -1.047997 |
| H | 1.990276  | 1.571575  | -1.304890 | N                                                 | -3.578922 -1.361180 -1.607502 |
| H | 1.828864  | 1.339200  | 0.422601  | C                                                 | -4.878219 -1.554213 -1.508851 |
| H | -0.889724 | -0.777489 | -0.400871 | N                                                 | -5.466286 -0.494291 -0.903624 |
| H | -0.607505 | 0.852824  | -0.609359 | C                                                 | -1.916511 0.429191 -1.018019  |
| H | -0.180351 | 0.092761  | 0.825486  | C                                                 | -0.833711 -0.636308 -0.720982 |
| H | 2.871497  | -1.024672 | -2.341871 | H                                                 | -1.223516 -1.348562 0.009495  |

C -0.360686 -1.431698 -1.962957  
 O -1.267109 -2.139875 -2.598945  
 O 0.799823 -1.393287 -2.300554  
 N 0.371513 -0.014156 -0.091925  
 H -4.701875 1.357017 -0.107942  
 H -5.420123 -2.421381 -1.851215  
 H -6.452329 -0.394569 -0.712764  
 H -1.867802 1.186175 -0.235037  
 H -1.685379 0.926903 -1.966785  
 H 0.900293 0.611255 -0.726309  
 H 1.021313 -0.766638 0.211626  
 H 0.104856 0.528296 0.743042  
 H -2.204471 -1.999603 -2.245884

H<sup>+</sup>H[Na]-cggc(++0/+00/--0/--0/-00/+0+) 2568

C -1.691328 3.356303 1.059334  
 C -0.198875 3.501772 1.299202  
 O 0.451510 2.289179 1.678514  
 C 0.343446 1.940243 3.054587  
 C 1.239863 0.741525 3.305486  
 O 0.784407 -0.448385 2.645372  
 C 0.042074 -1.351075 3.474007  
 C -0.163612 -2.648551 2.725543  
 O -0.986142 -2.396945 1.597661  
 C -1.223929 -3.542161 0.785601  
 C -2.278180 -3.198256 -0.241366  
 O -1.777712 -2.192669 -1.122632  
 C -2.696429 -1.778818 -2.149200  
 C -3.894041 -1.000732 -1.609393  
 O -3.513781 0.119385 -0.818130  
 C -3.495187 1.371582 -1.500807  
 C -3.267625 2.465514 -0.484342  
 O -1.917083 2.429706 -0.000191  
 H -2.087799 4.343630 0.785801  
 H -2.220455 3.024864 1.963173  
 H -0.030151 4.278440 2.056453  
 H 0.285025 3.819888 0.373312  
 H -0.695621 1.711375 3.326277  
 H 0.683848 2.774758 3.683905  
 H 1.325423 0.563850 4.382796  
 H 2.236852 0.954010 2.912355  
 H -0.928433 -0.917492 3.744234  
 H 0.603361 -1.555363 4.393888  
 H -0.640890 -3.375525 3.397752  
 H 0.807166 -3.059160 2.413254  
 H -1.592591 -4.376347 1.398147  
 H -0.293715 -3.861604 0.295610  
 H -3.176669 -2.847371 0.276203  
 H -2.531311 -4.099632 -0.814963  
 H -3.052379 -2.659486 -2.700216  
 H -2.105332 -1.159212 -2.822084  
 H -4.517508 -1.631758 -0.970729

H -4.515802 -0.692081 -2.459596  
 H -4.466715 1.552403 -1.981000  
 H -2.712381 1.393537 -2.265856  
 H -3.962802 2.338624 0.354547  
 H -3.453306 3.440282 -0.952892  
 C 4.510088 -1.065011 -0.190675  
 C 3.417146 -0.578441 -0.859255  
 N 3.833971 0.349258 -1.791851  
 C 5.145928 0.423477 -1.700430  
 N 5.598891 -0.420061 -0.741908  
 C 1.965769 -0.935214 -0.709404  
 C 1.016270 0.280444 -0.857143  
 H 1.468291 1.152907 -0.380663  
 C 0.655490 0.637360 -2.318453  
 O 1.644622 0.983042 -3.111503  
 O -0.498658 0.604169 -2.682756  
 N -0.259124 0.022078 -0.123364  
 H 4.612435 -1.791263 0.597642  
 H 5.789719 1.056375 -2.290151  
 H 6.564210 -0.552786 -0.479226  
 H 1.817839 -1.363192 0.284385  
 H 1.683873 -1.705919 -1.435786  
 H -0.048457 -0.182180 0.864999  
 H -0.795550 -0.779798 -0.512451  
 H -0.879250 0.851858 -0.148163  
 H 2.554416 0.874820 -2.681527

H<sup>+</sup>H[Na]-cggc(+0+/-00/+00/--0/-00/+00) 1043

C 0.882762 2.987476 1.980570  
 C 1.266127 3.236537 0.527771  
 O 0.282740 2.847888 -0.420586  
 C -0.916917 3.616440 -0.402014  
 C -1.804595 3.178818 -1.547119  
 O -2.142815 1.798843 -1.401004  
 C -3.429633 1.447175 -1.927076  
 C -3.513677 -0.048534 -2.126611  
 O -3.315264 -0.704625 -0.878535  
 C -3.346519 -2.122439 -0.996665  
 C -3.022420 -2.735785 0.344717  
 O -1.639736 -2.509343 0.659868  
 C -1.242230 -3.005437 1.940276  
 C -1.429439 -1.985709 3.047843  
 O -0.506361 -0.917489 2.846102  
 C -0.770750 0.207013 3.672933  
 C 0.329929 1.231014 3.508922  
 O 0.430800 1.641343 2.140162  
 H 1.772061 3.171391 2.597901  
 H 0.096921 3.675004 2.318073  
 H 1.518843 4.300224 0.413599  
 H 2.154965 2.652985 0.277737  
 H -1.451068 3.474560 0.545494  
 H -0.686218 4.684839 -0.517806



H<sup>+</sup>H[N $\alpha$ ]-cggc(-0/-00/+0/+00/+00/--0) 7309

|   |           |           |           |
|---|-----------|-----------|-----------|
| C | -0.406977 | -0.265486 | 3.729482  |
| C | -1.348122 | -1.332852 | 3.212436  |
| O | -0.738487 | -2.031734 | 2.133958  |
| C | -1.508245 | -3.145297 | 1.681791  |
| C | -0.978308 | -3.590818 | 0.330723  |
| O | -1.233987 | -2.626657 | -0.696534 |
| C | -2.483053 | -2.806571 | -1.386308 |
| C | -2.921824 | -1.501617 | -2.012601 |
| O | -3.227482 | -0.592028 | -0.957835 |
| C | -3.929299 | 0.586531  | -1.341969 |
| C | -3.029975 | 1.730391  | -1.783090 |
| O | -2.181793 | 2.082514  | -0.680830 |
| C | -1.562043 | 3.363196  | -0.789157 |
| C | -0.909417 | 3.694232  | 0.535670  |
| O | 0.164896  | 2.780787  | 0.761987  |
| C | 0.755024  | 2.840077  | 2.055317  |
| C | 0.015583  | 2.028002  | 3.108391  |
| O | -0.069493 | 0.661997  | 2.688478  |
| H | 0.514235  | -0.716851 | 4.114823  |
| H | -0.906471 | 0.255978  | 4.553213  |
| H | -1.575749 | -2.020025 | 4.039883  |
| H | -2.289503 | -0.878003 | 2.874961  |
| H | -2.565776 | -2.862348 | 1.600450  |
| H | -1.429878 | -3.973514 | 2.399974  |
| H | -1.414406 | -4.558523 | 0.060640  |
| H | 0.105685  | -3.716263 | 0.382743  |
| H | -3.252840 | -3.142650 | -0.683618 |
| H | -2.356382 | -3.568583 | -2.164465 |
| H | -3.816824 | -1.697500 | -2.619068 |
| H | -2.138166 | -1.101881 | -2.665456 |
| H | -4.492412 | 0.897133  | -0.458867 |
| H | -4.644537 | 0.364270  | -2.144792 |
| H | -3.665130 | 2.585763  | -2.048113 |
| H | -2.416080 | 1.464604  | -2.649362 |
| H | -2.317091 | 4.127946  | -1.011542 |
| H | -0.820790 | 3.365193  | -1.598301 |
| H | -1.657337 | 3.622777  | 1.334267  |
| H | -0.525944 | 4.722834  | 0.506260  |
| H | 1.767120  | 2.443087  | 1.941856  |
| H | 0.839152  | 3.878748  | 2.400914  |
| H | -0.994451 | 2.417457  | 3.287138  |
| H | 0.578970  | 2.101505  | 4.047415  |
| C | 4.462620  | -1.100967 | 0.529469  |
| C | 3.475599  | -0.748280 | -0.353346 |
| N | 4.033358  | -0.034477 | -1.394251 |
| C | 5.326685  | 0.043123  | -1.157486 |
| N | 5.631789  | -0.592999 | -0.000556 |
| C | 2.006661  | -1.052543 | -0.326794 |
| C | 1.117917  | 0.145197  | -0.746194 |
| H | 1.537341  | 1.076054  | -0.359536 |

|   |           |           |           |
|---|-----------|-----------|-----------|
| C | 0.922413  | 0.324094  | -2.271309 |
| O | -0.195930 | 0.384884  | -2.733809 |
| O | 2.003572  | 0.435575  | -3.009073 |
| N | -0.233209 | 0.007369  | -0.130372 |
| H | 4.444315  | -1.656846 | 1.451491  |
| H | 6.058457  | 0.536522  | -1.777090 |
| H | 6.553758  | -0.681160 | 0.400262  |
| H | 1.725779  | -1.349144 | 0.686613  |
| H | 1.785718  | -1.907641 | -0.975486 |
| H | -0.887159 | 0.740562  | -0.462651 |
| H | -0.173413 | 0.116011  | 0.894705  |
| H | -0.659382 | -0.914051 | -0.340918 |
| H | 2.863810  | 0.344106  | -2.482980 |

H<sup>+</sup>H[N $\pi$ ]-tg.g.g.(+00/-00/+0/+00/-00/+0+) sc12214

|   |           |           |           |
|---|-----------|-----------|-----------|
| C | -1.075465 | 2.586998  | 2.194269  |
| C | -1.361660 | 1.191931  | 2.702596  |
| O | -0.207860 | 0.379189  | 2.528389  |
| C | -0.340610 | -0.904182 | 3.127324  |
| C | 0.978470  | -1.642330 | 3.078690  |
| O | 1.241754  | -2.117667 | 1.762483  |
| C | 2.475965  | -2.808791 | 1.673490  |
| C | 2.647687  | -3.351693 | 0.266111  |
| O | 2.758562  | -2.330833 | -0.735253 |
| C | 4.069940  | -1.771305 | -0.879997 |
| C | 4.014999  | -0.531588 | -1.743644 |
| O | 3.373578  | 0.513237  | -1.029101 |
| C | 3.462460  | 1.774766  | -1.683361 |
| C | 2.981929  | 2.875186  | -0.763579 |
| O | 1.567714  | 2.820882  | -0.625369 |
| C | 1.052500  | 3.855203  | 0.200890  |
| C | -0.465486 | 3.782101  | 0.201734  |
| O | -0.980976 | 2.577398  | 0.768839  |
| H | -0.140852 | 2.944100  | 2.641402  |
| H | -1.886767 | 3.259354  | 2.505152  |
| H | -2.225247 | 0.758144  | 2.179796  |
| H | -1.616525 | 1.261590  | 3.770273  |
| H | -0.631147 | -0.792798 | 4.182042  |
| H | -1.121459 | -1.488755 | 2.622116  |
| H | 0.929863  | -2.491596 | 3.775562  |
| H | 1.784136  | -0.973258 | 3.409865  |
| H | 2.494118  | -3.660540 | 2.370819  |
| H | 3.306280  | -2.142217 | 1.946715  |
| H | 1.771486  | -3.944115 | -0.005011 |
| H | 3.526506  | -4.005618 | 0.225690  |
| H | 4.725723  | -2.514868 | -1.349885 |
| H | 4.482084  | -1.506507 | 0.099008  |
| H | 5.046752  | -0.246079 | -1.994638 |
| H | 3.489076  | -0.743221 | -2.686151 |
| H | 2.869683  | 1.772007  | -2.608401 |
| H | 4.508780  | 1.982082  | -1.949040 |

|   |           |           |           |
|---|-----------|-----------|-----------|
| H | 3.467169  | 2.774830  | 0.216832  |
| H | 3.278007  | 3.842367  | -1.194998 |
| H | 1.458113  | 3.765214  | 1.218323  |
| H | 1.350055  | 4.840634  | -0.188214 |
| H | -0.824476 | 3.810202  | -0.829618 |
| H | -0.871365 | 4.656633  | 0.726385  |
| C | -0.689618 | -1.507076 | -2.047406 |
| C | -1.715214 | -0.617544 | -1.901261 |
| N | -1.246251 | 0.352708  | -1.026123 |
| C | -0.000207 | 0.065091  | -0.651667 |
| N | 0.360248  | -1.054138 | -1.268939 |
| C | -3.081608 | -0.582362 | -2.509222 |
| C | -4.213587 | -0.294102 | -1.490669 |
| H | -5.165602 | -0.427072 | -2.023223 |
| C | -4.235121 | -1.314841 | -0.358214 |
| O | -4.203771 | -1.040444 | 0.814900  |
| O | -4.316013 | -2.573042 | -0.829206 |
| N | -4.056555 | 1.048070  | -0.924600 |
| H | -0.623266 | -2.406381 | -2.634714 |
| H | 0.597388  | 0.645018  | 0.027517  |
| H | 1.273913  | -1.513315 | -1.115512 |
| H | -3.128916 | 0.198878  | -3.275496 |
| H | -3.267590 | -1.532756 | -3.010932 |
| H | -4.492903 | 1.097912  | -0.008629 |
| H | -4.493361 | 1.743475  | -1.520060 |
| H | -1.800909 | 1.124718  | -0.655284 |
| H | -4.366995 | -3.177086 | -0.072010 |

H<sup>+</sup>H[N $\pi$ ]-tg.tg(+00/-00/+0+/-00/-00/+0+) sc5117

|   |           |           |           |
|---|-----------|-----------|-----------|
| C | -3.879989 | -1.466061 | -1.896792 |
| C | -3.468485 | -2.741761 | -1.183823 |
| O | -2.878850 | -2.520415 | 0.104630  |
| C | -3.815295 | -2.298017 | 1.165911  |
| C | -3.089667 | -1.829289 | 2.406531  |
| O | -2.608202 | -0.510730 | 2.199255  |
| C | -2.084287 | 0.086049  | 3.380815  |
| C | -1.834571 | 1.560294  | 3.154054  |
| O | -0.705363 | 1.749429  | 2.310572  |
| C | -0.412430 | 3.120769  | 2.085889  |
| C | 0.846815  | 3.231592  | 1.242925  |
| O | 0.709550  | 2.681957  | -0.067924 |
| C | 0.107493  | 3.564608  | -1.015363 |
| C | -0.225859 | 2.809710  | -2.282452 |
| O | -1.303496 | 1.919009  | -2.034120 |
| C | -1.773616 | 1.272507  | -3.210559 |
| C | -3.032676 | 0.490395  | -2.910915 |
| O | -2.726972 | -0.689497 | -2.176303 |
| H | -4.594296 | -0.885404 | -1.296104 |
| H | -4.390579 | -1.749643 | -2.829919 |
| H | -2.710789 | -3.260804 | -1.774163 |
| H | -4.335637 | -3.404862 | -1.083566 |
| H | -4.549774 | -1.540759 | 0.874016  |

|   |           |           |           |
|---|-----------|-----------|-----------|
| H | -4.341250 | -3.236249 | 1.382371  |
| H | -2.265054 | -2.514948 | 2.650984  |
| H | -3.800174 | -1.850213 | 3.245423  |
| H | -1.153747 | -0.412311 | 3.685831  |
| H | -2.809052 | -0.015473 | 4.201127  |
| H | -2.726565 | 2.019971  | 2.707089  |
| H | -1.656232 | 2.036146  | 4.129330  |
| H | -1.264162 | 3.614419  | 1.597274  |
| H | -0.234594 | 3.636864  | 3.041525  |
| H | 1.650470  | 2.669984  | 1.724481  |
| H | 1.155005  | 4.283536  | 1.186042  |
| H | 0.802709  | 4.381327  | -1.252894 |
| H | -0.812415 | 4.000744  | -0.609712 |
| H | -0.506028 | 3.538896  | -3.056435 |
| H | 0.656863  | 2.261662  | -2.643049 |
| H | -1.003447 | 0.602645  | -3.617794 |
| H | -2.010966 | 2.023401  | -3.977829 |
| H | -3.731615 | 1.121789  | -2.345793 |
| H | -3.509288 | 0.220585  | -3.864461 |
| C | 0.877780  | -2.297433 | -0.233653 |
| C | 1.892887  | -1.397455 | -0.389898 |
| N | 1.302113  | -0.146362 | -0.282368 |
| C | -0.006751 | -0.276161 | -0.065253 |
| N | -0.284690 | -1.574207 | -0.034701 |
| C | 3.347352  | -1.597534 | -0.670338 |
| C | 4.273849  | -0.759527 | 0.246238  |
| H | 4.027561  | -0.986198 | 1.287004  |
| C | 5.727317  | -1.186141 | 0.007302  |
| O | 6.536396  | -0.528210 | -0.592218 |
| O | 5.981119  | -2.401721 | 0.531040  |
| N | 4.060935  | 0.667907  | 0.007096  |
| H | 0.888337  | -3.373376 | -0.253675 |
| H | -0.701347 | 0.532305  | 0.070830  |
| H | -1.244851 | -1.942600 | 0.076312  |
| H | 3.578619  | -2.658077 | -0.559240 |
| H | 3.563960  | -1.330228 | -1.711803 |
| H | 4.444058  | 1.212072  | 0.774519  |
| H | 4.589540  | 0.950990  | -0.816485 |
| H | 1.809958  | 0.737628  | -0.291314 |
| H | 6.903619  | -2.633024 | 0.336739  |

H<sup>+</sup>H[N $\pi$ ]-tg.g.g(-00/-00/-00/-00/+00/-0) sc13838

|   |           |           |           |
|---|-----------|-----------|-----------|
| C | 3.940661  | -1.304730 | -1.821888 |
| C | 4.370768  | 0.079718  | -1.364344 |
| O | 3.240272  | 0.930868  | -1.283908 |
| C | 3.583771  | 2.259144  | -0.902866 |
| C | 2.346078  | 3.124076  | -0.812912 |
| O | 1.588139  | 2.773190  | 0.336849  |
| C | 0.505731  | 3.657833  | 0.586343  |
| C | -0.157652 | 3.291259  | 1.895671  |
| O | -0.817511 | 2.034139  | 1.776293  |
| C | -1.292554 | 1.530543  | 3.025575  |



|   |           |           |           |                                                                 |           |           |           |
|---|-----------|-----------|-----------|-----------------------------------------------------------------|-----------|-----------|-----------|
| C | -1.689736 | 0.078318  | 2.879391  | H                                                               | -4.509923 | -2.835347 | -1.300368 |
| O | -0.517679 | -0.699630 | 2.680327  |                                                                 |           |           |           |
| C | -0.782933 | -2.069005 | 2.426234  | H <sup>+</sup> H[N $\pi$ ]-tg.tg(+00/-00/+00/--0/-00/+0+) sc241 |           |           |           |
| C | 0.517600  | -2.840348 | 2.369757  | C                                                               | -1.092010 | -1.733095 | 3.112743  |
| O | 1.319716  | -2.369639 | 1.291707  | C                                                               | -0.529387 | -0.374848 | 3.469430  |
| C | 2.480842  | -3.155650 | 1.065842  | O                                                               | 0.453208  | 0.011428  | 2.514548  |
| C | 3.507849  | -2.333507 | 0.319476  | C                                                               | 1.157123  | 1.202204  | 2.841284  |
| O | 2.995644  | -1.957304 | -0.964736 | C                                                               | 0.404244  | 2.490069  | 2.546319  |
| H | 4.830814  | -1.936636 | -1.932874 | O                                                               | 0.188088  | 2.609343  | 1.144935  |
| H | 3.449526  | -1.234809 | -2.794234 | C                                                               | -0.563996 | 3.768661  | 0.796585  |
| H | 5.094779  | 0.461659  | -2.100338 | C                                                               | -1.000929 | 3.678810  | -0.648097 |
| H | 4.887016  | 0.038928  | -0.395061 | O                                                               | -1.949759 | 2.628856  | -0.778949 |
| H | 4.097514  | 2.255314  | 0.067863  | C                                                               | -2.528751 | 2.543286  | -2.075727 |
| H | 4.262677  | 2.696843  | -1.648900 | C                                                               | -3.688059 | 1.572851  | -2.056349 |
| H | 2.666344  | 4.173779  | -0.744742 | O                                                               | -3.216257 | 0.235673  | -1.933214 |
| H | 1.741825  | 3.013116  | -1.724560 | C                                                               | -4.274076 | -0.705935 | -1.862165 |
| H | -0.223100 | 3.620053  | -0.237212 | C                                                               | -3.699298 | -2.110629 | -1.810573 |
| H | 0.869154  | 4.693081  | 0.660397  | O                                                               | -2.884134 | -2.371072 | -0.661152 |
| H | -0.878957 | 4.076352  | 2.163728  | C                                                               | -3.604842 | -2.595689 | 0.556436  |
| H | 0.602944  | 3.238885  | 2.684688  | C                                                               | -2.631222 | -2.835673 | 1.687708  |
| H | -2.159711 | 2.114748  | 3.363448  | O                                                               | -1.948826 | -1.627683 | 1.982060  |
| H | -0.503588 | 1.614846  | 3.783007  | H                                                               | -1.659871 | -2.108733 | 3.976266  |
| H | -2.208743 | -0.238896 | 3.795602  | H                                                               | -0.272017 | -2.436078 | 2.911283  |
| H | -2.388329 | -0.049711 | 2.041060  | H                                                               | -0.071272 | -0.440399 | 4.466995  |
| H | -1.333284 | -2.182113 | 1.481240  | H                                                               | -1.348855 | 0.353179  | 3.515134  |
| H | -1.401956 | -2.498578 | 3.227676  | H                                                               | 2.073562  | 1.180677  | 2.246727  |
| H | 0.280622  | -3.905612 | 2.236108  | H                                                               | 1.443485  | 1.199631  | 3.902617  |
| H | 1.063129  | -2.724746 | 3.315658  | H                                                               | 1.005566  | 3.334887  | 2.914179  |
| H | 2.223661  | -4.062565 | 0.501425  | H                                                               | -0.558287 | 2.515948  | 3.074423  |
| H | 2.933296  | -3.463721 | 2.018507  | H                                                               | 0.043694  | 4.673362  | 0.937786  |
| H | 4.418647  | -2.931339 | 0.185915  | H                                                               | -1.451607 | 3.845838  | 1.437515  |
| H | 3.752043  | -1.441900 | 0.906137  | H                                                               | -0.133677 | 3.502583  | -1.301257 |
| C | -0.486441 | -0.965537 | -2.242835 | H                                                               | -1.450896 | 4.638228  | -0.939826 |
| C | -1.495624 | -0.086055 | -1.971636 | H                                                               | -1.779646 | 2.224704  | -2.814084 |
| N | -1.119494 | 0.563980  | -0.803376 | H                                                               | -2.909585 | 3.527998  | -2.381100 |
| C | 0.056311  | 0.097061  | -0.379772 | H                                                               | -4.254696 | 1.684240  | -2.992012 |
| N | 0.457726  | -0.826541 | -1.243128 | H                                                               | -4.355369 | 1.818969  | -1.219495 |
| C | -2.765601 | 0.219098  | -2.701532 | H                                                               | -4.914834 | -0.638221 | -2.754580 |
| C | -4.011018 | 0.305868  | -1.783612 | H                                                               | -4.908290 | -0.499246 | -0.988774 |
| H | -4.886010 | 0.414353  | -2.439166 | H                                                               | -3.050316 | -2.270987 | -2.673644 |
| C | -4.239560 | -0.988261 | -1.010167 | H                                                               | -4.516044 | -2.841220 | -1.855977 |
| O | -4.351777 | -1.061330 | 0.187585  | H                                                               | -4.246446 | -3.477603 | 0.436338  |
| O | -4.322196 | -2.047949 | -1.834926 | H                                                               | -4.232013 | -1.731036 | 0.796312  |
| N | -3.868798 | 1.414344  | -0.833611 | H                                                               | -1.920478 | -3.629327 | 1.415083  |
| H | -0.368505 | -1.664853 | -3.052262 | H                                                               | -3.199565 | -3.179835 | 2.564114  |
| H | 0.566649  | 0.415382  | 0.510946  | C                                                               | 0.797712  | -1.884440 | -1.225322 |
| H | 1.353244  | -1.332052 | -1.137177 | C                                                               | 1.810857  | -0.971229 | -1.176278 |
| H | -2.923567 | -0.540816 | -3.467810 | N                                                               | 1.230125  | 0.207695  | -0.731069 |
| H | -2.676323 | 1.180330  | -3.219402 | C                                                               | -0.071312 | 0.019020  | -0.504407 |
| H | -4.182233 | 2.284888  | -1.249948 | N                                                               | -0.354423 | -1.239606 | -0.813929 |
| H | -4.433373 | 1.241482  | -0.006592 | C                                                               | 3.257616  | -1.076107 | -1.538364 |
| H | -1.710122 | 1.229472  | -0.305842 | C                                                               | 4.200854  | -0.439102 | -0.487420 |

|   |           |           |           |
|---|-----------|-----------|-----------|
| H | 3.999904  | -0.901334 | 0.482788  |
| C | 5.654150  | -0.752131 | -0.862314 |
| O | 6.427301  | 0.054471  | -1.307593 |
| O | 5.952517  | -2.049158 | -0.651622 |
| N | 3.947280  | 1.000979  | -0.386567 |
| H | 0.801723  | -2.918973 | -1.521655 |
| H | -0.762387 | 0.764574  | -0.147804 |
| H | -1.297617 | -1.652029 | -0.714605 |
| H | 3.435885  | -0.584351 | -2.502683 |
| H | 3.509258  | -2.129673 | -1.667897 |
| H | 4.404602  | 1.474706  | -1.164320 |
| H | 4.389772  | 1.373720  | 0.448810  |
| H | 1.783561  | 1.031540  | -0.497701 |
| H | 6.872749  | -2.200231 | -0.921051 |

H<sup>+</sup>H[N $\pi$ ]-tg.g.g(+00/-00/+0+/-+00/-00/+0+) sc329

|   |           |           |           |
|---|-----------|-----------|-----------|
| C | -0.578183 | -2.986924 | 1.734125  |
| C | -1.978523 | -3.229554 | 1.211581  |
| O | -2.105560 | -2.797668 | -0.149366 |
| C | -3.449743 | -2.762573 | -0.642923 |
| C | -4.210042 | -1.506692 | -0.253360 |
| O | -3.584493 | -0.374833 | -0.841295 |
| C | -4.312215 | 0.829997  | -0.629236 |
| C | -3.574772 | 1.995620  | -1.248604 |
| O | -2.405442 | 2.285149  | -0.485956 |
| C | -1.747389 | 3.475393  | -0.899127 |
| C | -0.719756 | 3.880999  | 0.133105  |
| O | 0.415948  | 3.007809  | 0.100116  |
| C | 1.319934  | 3.198303  | 1.196799  |
| C | 0.981085  | 2.350108  | 2.412476  |
| O | 1.217107  | 0.967241  | 2.133197  |
| C | 0.805870  | 0.105104  | 3.205815  |
| C | 0.783871  | -1.344503 | 2.771077  |
| O | -0.379307 | -1.602441 | 1.985846  |
| H | 0.172264  | -3.369774 | 1.028209  |
| H | -0.472650 | -3.557687 | 2.667999  |
| H | -2.690341 | -2.692961 | 1.846998  |
| H | -2.200159 | -4.303116 | 1.265679  |
| H | -3.999732 | -3.646021 | -0.296952 |
| H | -3.372869 | -2.816833 | -1.730912 |
| H | -4.256769 | -1.387936 | 0.838015  |
| H | -5.242466 | -1.607772 | -0.619685 |
| H | -4.448202 | 1.009448  | 0.445798  |
| H | -5.305522 | 0.755029  | -1.093899 |
| H | -4.242362 | 2.868260  | -1.251655 |
| H | -3.309701 | 1.764383  | -2.289258 |
| H | -2.473719 | 4.295389  | -0.988521 |
| H | -1.275907 | 3.340980  | -1.883419 |
| H | -1.186161 | 3.858628  | 1.124192  |
| H | -0.389636 | 4.906887  | -0.074850 |
| H | 1.328462  | 4.253552  | 1.492891  |
| H | 2.315334  | 2.951205  | 0.825827  |

|   |           |           |           |
|---|-----------|-----------|-----------|
| H | -0.068955 | 2.486145  | 2.698558  |
| H | 1.606265  | 2.676626  | 3.255736  |
| H | -0.195441 | 0.398033  | 3.541364  |
| H | 1.501436  | 0.217668  | 4.047582  |
| H | 0.756035  | -1.960781 | 3.681441  |
| H | 1.696260  | -1.600215 | 2.218821  |
| C | 1.050894  | -1.447706 | -2.118351 |
| C | 1.628688  | -0.211085 | -2.043585 |
| N | 0.707162  | 0.593097  | -1.380915 |
| C | -0.367694 | -0.121120 | -1.052931 |
| N | -0.183181 | -1.358470 | -1.501905 |
| C | 3.012158  | 0.246826  | -2.383594 |
| C | 4.084354  | -0.495856 | -1.526296 |
| H | 5.011603  | 0.092218  | -1.582488 |
| C | 3.652282  | -0.501821 | -0.061925 |
| O | 3.588342  | -1.492253 | 0.625324  |
| O | 3.301928  | 0.722657  | 0.357570  |
| N | 4.240523  | -1.868193 | -1.985198 |
| H | 1.440016  | -2.363675 | -2.524960 |
| H | -1.235820 | 0.242170  | -0.529081 |
| H | -0.833516 | -2.109118 | -1.244267 |
| H | 3.090614  | 1.323428  | -2.224394 |
| H | 3.234409  | 0.053081  | -3.434788 |
| H | 4.463549  | -2.483268 | -1.209224 |
| H | 4.966860  | -1.948907 | -2.686718 |
| H | 0.818186  | 1.558875  | -1.058698 |
| H | 2.774015  | 0.658648  | 1.187011  |

H<sup>+</sup>H[N $\pi$ ]-tg.g.g(-00/+00/--0/-00/+00/--0) sc283

|   |           |           |           |
|---|-----------|-----------|-----------|
| C | -1.006066 | 3.250873  | 1.311785  |
| C | -0.699331 | 2.297948  | 2.453961  |
| O | -0.938484 | 0.956128  | 2.044480  |
| C | -0.728095 | 0.026042  | 3.105658  |
| C | -0.794565 | -1.400688 | 2.606159  |
| O | 0.406136  | -1.727691 | 1.906994  |
| C | 0.553176  | -3.117016 | 1.664671  |
| C | 1.931986  | -3.393171 | 1.104519  |
| O | 2.023252  | -2.938368 | -0.253154 |
| C | 3.345269  | -2.937771 | -0.806505 |
| C | 4.179741  | -1.733371 | -0.406685 |
| O | 3.588450  | -0.549788 | -0.923427 |
| C | 4.404086  | 0.599730  | -0.717545 |
| C | 3.727326  | 1.832230  | -1.273800 |
| O | 2.630037  | 2.199980  | -0.442295 |
| C | 2.060291  | 3.457643  | -0.787614 |
| C | 1.069510  | 3.880216  | 0.273619  |
| O | -0.123766 | 3.097008  | 0.191231  |
| H | -0.966626 | 4.282726  | 1.680309  |
| H | -2.010656 | 3.063482  | 0.929638  |
| H | -1.349375 | 2.560244  | 3.302718  |
| H | 0.341547  | 2.404567  | 2.790156  |
| H | -1.500085 | 0.165975  | 3.875759  |

|   |           |           |           |
|---|-----------|-----------|-----------|
| H | 0.252085  | 0.199931  | 3.568677  |
| H | -1.673498 | -1.546362 | 1.965354  |
| H | -0.899919 | -2.057465 | 3.481455  |
| H | -0.221862 | -3.483003 | 0.975294  |
| H | 0.451681  | -3.680531 | 2.603652  |
| H | 2.126102  | -4.472598 | 1.130156  |
| H | 2.676196  | -2.885675 | 1.726179  |
| H | 3.214565  | -2.946962 | -1.890435 |
| H | 3.868186  | -3.857374 | -0.518315 |
| H | 5.188742  | -1.871254 | -0.823251 |
| H | 4.281609  | -1.659909 | 0.684957  |
| H | 5.367799  | 0.468637  | -1.229777 |
| H | 4.601139  | 0.740609  | 0.353737  |
| H | 3.387691  | 1.645416  | -2.301759 |
| H | 4.462634  | 2.648187  | -1.300380 |
| H | 1.572205  | 3.407252  | -1.771432 |
| H | 2.847761  | 4.222105  | -0.843747 |
| H | 0.819188  | 4.939290  | 0.128310  |
| H | 1.534858  | 3.764947  | 1.258860  |
| C | -1.053719 | -1.323482 | -1.893982 |
| C | -1.654967 | -0.096339 | -1.865942 |
| N | -0.742151 | 0.749247  | -1.249852 |
| C | 0.347864  | 0.067065  | -0.902897 |
| N | 0.184097  | -1.190204 | -1.296113 |
| C | -3.020188 | 0.335488  | -2.287799 |
| C | -4.042453 | 0.375791  | -1.111046 |
| H | -4.974741 | 0.765147  | -1.526427 |
| C | -4.319055 | -1.049222 | -0.621524 |
| O | -3.889359 | -1.523055 | 0.400681  |
| O | -5.084125 | -1.736138 | -1.494405 |
| N | -3.582896 | 1.265164  | -0.055750 |
| H | -1.404822 | -2.262415 | -2.285428 |
| H | 1.213370  | 0.476000  | -0.407758 |
| H | 0.855186  | -1.931853 | -1.036921 |
| H | -3.386475 | -0.337340 | -3.065178 |
| H | -2.978615 | 1.340576  | -2.712900 |
| H | -2.954796 | 0.780409  | 0.583453  |
| H | -4.368613 | 1.589393  | 0.498308  |
| H | -0.855396 | 1.728614  | -0.983905 |
| H | -5.232413 | -2.626604 | -1.138398 |

**Structures (Lys)H<sup>+</sup>-18C6**H<sup>+</sup>K[Ne]-ctggtt(-00/+00/-00/+00/-00/+00) 389

|   |           |           |           |
|---|-----------|-----------|-----------|
| C | -1.211123 | -1.682179 | 2.507865  |
| C | -0.126718 | -2.726927 | 2.387374  |
| O | 0.531609  | -2.624281 | 1.116481  |
| C | 1.570715  | -3.593566 | 0.969182  |
| C | 2.293239  | -3.390212 | -0.343107 |
| O | 2.962201  | -2.135361 | -0.311217 |
| C | 3.811164  | -1.898527 | -1.425580 |
| C | 4.535433  | -0.587792 | -1.217023 |
| O | 3.594341  | 0.488155  | -1.213686 |
| C | 4.213808  | 1.763887  | -1.036795 |
| C | 3.158324  | 2.846420  | -1.046634 |
| O | 2.309109  | 2.665528  | 0.078310  |
| C | 1.325385  | 3.679742  | 0.237212  |
| C | 0.612963  | 3.470652  | 1.554108  |
| O | -0.131966 | 2.251955  | 1.527478  |
| C | -0.751087 | 1.970324  | 2.790788  |
| C | -1.522584 | 0.673686  | 2.719672  |
| O | -0.606296 | -0.390854 | 2.484332  |
| H | -1.952722 | -1.776972 | 1.706611  |
| H | -1.729628 | -1.840367 | 3.463947  |
| H | -0.578062 | -3.722357 | 2.486231  |
| H | 0.611495  | -2.596159 | 3.188326  |
| H | 2.283029  | -3.502934 | 1.798838  |
| H | 1.141257  | -4.603847 | 0.988918  |
| H | 1.585461  | -3.428275 | -1.183595 |
| H | 3.016292  | -4.207272 | -0.472161 |
| H | 3.227910  | -1.868463 | -2.357106 |
| H | 4.556999  | -2.700089 | -1.518509 |
| H | 5.079265  | -0.609594 | -0.264341 |
| H | 5.260203  | -0.445679 | -2.029292 |
| H | 4.759781  | 1.784196  | -0.085287 |
| H | 4.925855  | 1.948817  | -1.851699 |
| H | 3.657179  | 3.824277  | -0.999375 |
| H | 2.578236  | 2.805469  | -1.979668 |
| H | 0.609393  | 3.656724  | -0.597059 |
| H | 1.796538  | 4.672210  | 0.251020  |
| H | 1.348411  | 3.438484  | 2.367691  |
| H | -0.065248 | 4.315557  | 1.732541  |
| H | -1.441168 | 2.783236  | 3.050219  |
| H | 0.021897  | 1.905760  | 3.566550  |
| H | -2.286786 | 0.713651  | 1.935026  |
| H | -2.037150 | 0.528814  | 3.679942  |
| C | -1.984254 | -0.340915 | -2.587634 |
| C | -1.257455 | -0.338270 | -1.232966 |
| C | 0.215873  | 0.025818  | -1.378241 |
| N | 0.925177  | 0.026838  | -0.061193 |
| C | -3.390585 | -0.970673 | -2.576269 |
| C | -4.497966 | -0.218625 | -1.809234 |
| H | -5.418000 | -0.798290 | -1.932155 |
| C | -4.243334 | -0.222619 | -0.285568 |

|   |           |           |           |
|---|-----------|-----------|-----------|
| O | -3.958582 | -1.218494 | 0.332455  |
| O | -4.363630 | 0.977274  | 0.293320  |
| N | -4.748585 | 1.162777  | -2.260935 |
| H | -1.388842 | -0.913344 | -3.307963 |
| H | -2.016807 | 0.680176  | -2.989869 |
| H | -1.726309 | 0.369211  | -0.544394 |
| H | -1.339073 | -1.326908 | -0.773386 |
| H | 0.735741  | -0.686441 | -2.021122 |
| H | 0.344358  | 1.018516  | -1.813996 |
| H | 0.823623  | -0.882926 | 0.420995  |
| H | 0.562454  | 0.764562  | 0.566301  |
| H | -3.729716 | -1.080462 | -3.610823 |
| H | -3.328671 | -1.977988 | -2.156812 |
| H | -4.605628 | 1.589968  | -0.443325 |
| H | -5.631857 | 1.255038  | -2.747913 |
| H | -4.019961 | 1.512996  | -2.872457 |
| H | 1.929028  | 0.200688  | -0.218632 |

H<sup>+</sup>K[Ne]-tg.tttt(-00/+00/-00/+00/-00/+00) 0

|   |           |           |           |
|---|-----------|-----------|-----------|
| O | -0.822236 | 0.624645  | 2.890536  |
| C | -0.123391 | -0.430093 | 3.539154  |
| C | -0.917451 | -1.708085 | 3.395155  |
| C | -0.222809 | 1.902673  | 3.059309  |
| C | -1.113516 | 2.949510  | 2.430625  |
| O | -1.184460 | 2.749116  | 1.015739  |
| C | -2.018473 | 3.716539  | 0.371594  |
| C | -2.135092 | 3.405030  | -1.103069 |
| O | -2.824800 | 2.171705  | -1.259154 |
| C | -3.141199 | 1.845987  | -2.606509 |
| C | -3.955891 | 0.572384  | -2.620512 |
| O | -3.161426 | -0.511959 | -2.134408 |
| C | -3.864403 | -1.756876 | -2.133600 |
| C | -2.956398 | -2.854779 | -1.627422 |
| O | -2.635696 | -2.592600 | -0.267357 |
| O | -0.989705 | -2.091079 | 2.018623  |
| C | -1.738871 | -3.295179 | 1.829393  |
| C | -1.858370 | -3.607649 | 0.355205  |
| H | 0.879894  | -0.549521 | 3.107503  |
| H | -0.008142 | -0.212553 | 4.609999  |
| H | -0.426056 | -2.500488 | 3.974519  |
| H | -1.930300 | -1.563838 | 3.791235  |
| H | 0.776070  | 1.922874  | 2.602050  |
| H | -0.112359 | 2.136712  | 4.127189  |
| H | -0.701147 | 3.944295  | 2.643735  |
| H | -2.120229 | 2.889619  | 2.862403  |
| H | -1.585904 | 4.717983  | 0.494664  |
| H | -3.015419 | 3.709036  | 0.829262  |
| H | -1.139574 | 3.352749  | -1.566549 |
| H | -2.690730 | 4.220280  | -1.586494 |
| H | -2.224245 | 1.719090  | -3.199226 |
| H | -3.734909 | 2.647786  | -3.066650 |
| H | -4.278917 | 0.365121  | -3.648972 |

|                                             |           |           |           |   |           |           |           |
|---------------------------------------------|-----------|-----------|-----------|---|-----------|-----------|-----------|
| H                                           | -4.847363 | 0.692054  | -1.992233 | C | -4.555837 | -1.156838 | -0.417497 |
| H                                           | -4.188174 | -2.001708 | -3.153497 | O | -3.289016 | -1.771569 | -0.617381 |
| H                                           | -4.752520 | -1.682052 | -1.493748 | H | -3.402085 | -2.939948 | 1.092900  |
| H                                           | -2.043314 | -2.907390 | -2.236901 | H | -3.887921 | -3.753070 | -0.408265 |
| H                                           | -3.482316 | -3.814990 | -1.719915 | H | -1.545649 | -3.588288 | -1.261227 |
| H                                           | -1.233023 | -4.128494 | 2.334073  | H | -1.691690 | -4.586539 | 0.194454  |
| H                                           | -2.739524 | -3.179502 | 2.263902  | H | -0.270061 | -4.046084 | 1.938503  |
| H                                           | -0.863444 | -3.671555 | -0.107834 | H | -1.419347 | -2.757443 | 2.379490  |
| H                                           | -2.345749 | -4.586235 | 0.246440  | H | 1.531865  | -2.323942 | 1.672114  |
| O                                           | 6.588882  | 1.464732  | -0.743015 | H | 0.853613  | -2.413488 | 3.313474  |
| C                                           | 6.363422  | 0.134878  | -0.638061 | H | 2.230849  | -0.096466 | 2.256970  |
| H                                           | 7.404937  | 1.667331  | -0.258907 | H | 1.356853  | -0.045935 | 3.806948  |
| C                                           | 5.072701  | -0.285335 | -1.346174 | H | 1.560885  | 2.206698  | 2.966034  |
| O                                           | 7.088993  | -0.611278 | -0.031844 | H | -0.152289 | 1.717580  | 2.903764  |
| N                                           | 5.044568  | -1.702453 | -1.685409 | H | 1.030137  | 3.245614  | -0.330019 |
| H                                           | 4.998534  | 0.298368  | -2.268505 | H | 1.356098  | 3.790721  | 1.324361  |
| C                                           | 3.872119  | 0.076965  | -0.441912 | H | -0.732446 | 4.762984  | 0.556154  |
| H                                           | 5.641909  | -1.894567 | -2.482808 | H | -1.110358 | 3.599213  | 1.840083  |
| H                                           | 5.416339  | -2.247493 | -0.911342 | H | -3.089195 | 4.353287  | -0.269769 |
| H                                           | 3.916157  | -0.560389 | 0.449929  | H | -3.278890 | 3.173878  | 1.051117  |
| H                                           | 3.975608  | 1.112142  | -0.101830 | H | -3.379871 | 2.511595  | -1.939486 |
| C                                           | 2.528303  | -0.114807 | -1.150918 | H | -4.786101 | 2.746742  | -0.876211 |
| H                                           | 2.454002  | 0.598734  | -1.981051 | H | -4.335101 | 0.083135  | -2.168061 |
| H                                           | 2.508540  | -1.115535 | -1.591747 | H | -5.588536 | 0.608631  | -1.020932 |
| C                                           | 1.331675  | 0.067499  | -0.208754 | H | -5.355514 | -1.779918 | -0.841913 |
| H                                           | 1.401440  | -0.654337 | 0.612198  | H | -4.750526 | -1.031557 | 0.656072  |
| H                                           | 1.353125  | 1.067788  | 0.237863  | C | 2.028533  | -0.120569 | -1.804871 |
| C                                           | 0.009437  | -0.131228 | -0.940713 | C | 0.727287  | -0.770781 | -2.294393 |
| H                                           | -0.112208 | 0.601723  | -1.739827 | C | -0.547379 | 0.005242  | -1.967207 |
| H                                           | -0.040972 | -1.123021 | -1.392582 | N | -0.856879 | 0.021032  | -0.500734 |
| N                                           | -1.180070 | 0.000648  | -0.041040 | C | 3.242351  | -1.033561 | -2.033571 |
| H                                           | -2.038253 | -0.145168 | -0.595110 | C | 4.558763  | -0.515625 | -1.427247 |
| H                                           | -1.161491 | -0.701924 | 0.716093  | H | 5.315322  | -1.297362 | -1.550864 |
| H                                           | -1.228935 | 0.938850  | 0.388087  | C | 4.424998  | -0.341696 | 0.103095  |
| H+K[Ne]-ctgtg(+00/-00/+00/--0/+00/+0+) 2088 |           |           |           |   |           |           |           |
| C                                           | -3.173241 | -3.037419 | 0.022938  | O | 3.825235  | -1.122238 | 0.803264  |
| C                                           | -1.764894 | -3.562935 | -0.191431 | O | 5.034187  | 0.740278  | 0.588355  |
| O                                           | -0.754726 | -2.741011 | 0.400687  | N | 5.107053  | 0.721431  | -2.009382 |
| C                                           | -0.521225 | -2.987919 | 1.794675  | H | 2.159944  | 0.839332  | -2.321574 |
| C                                           | 0.633294  | -2.138246 | 2.272301  | H | 1.952254  | 0.105935  | -0.737487 |
| O                                           | 0.262886  | -0.764640 | 2.191922  | H | 0.643263  | -1.778978 | -1.874348 |
| C                                           | 1.261053  | 0.107590  | 2.722571  | H | 0.762495  | -0.892808 | -3.382141 |
| C                                           | 0.841812  | 1.537707  | 2.477935  | H | -1.405591 | -0.456737 | -2.456242 |
| O                                           | 0.833993  | 1.796819  | 1.065642  | H | -0.486447 | 1.045285  | -2.293677 |
| C                                           | 0.693590  | 3.172286  | 0.706496  | H | -0.837191 | -0.935931 | -0.105961 |
| C                                           | -0.728978 | 3.694169  | 0.814387  | H | -1.804713 | 0.401890  | -0.353015 |
| O                                           | -1.555461 | 2.961109  | -0.081941 | H | 3.037890  | -2.008281 | -1.583589 |
| C                                           | -2.932120 | 3.304116  | 0.017309  | H | 3.396963  | -1.201906 | -3.104757 |
| C                                           | -3.738819 | 2.420209  | -0.905780 | H | 5.415739  | 1.197919  | -0.197048 |
| O                                           | -3.641216 | 1.063610  | -0.467074 | H | 5.806343  | 0.536797  | -2.718312 |
| C                                           | -4.577149 | 0.190263  | -1.102354 | H | 4.390482  | 1.307887  | -2.423439 |
|                                             |           |           |           | H | -0.202007 | 0.607485  | 0.044779  |

H<sup>+</sup>K[Ne]-cgggt(-00/+00/--0/-00/+00/--0) 739

|   |           |           |           |
|---|-----------|-----------|-----------|
| C | -3.760328 | -0.529498 | -2.124823 |
| C | -3.132243 | 0.685918  | -2.768700 |
| O | -2.461645 | 1.461728  | -1.774668 |
| C | -1.971561 | 2.711899  | -2.268582 |
| C | -1.466736 | 3.545705  | -1.112868 |
| O | -0.372159 | 2.877866  | -0.505344 |
| C | 0.225021  | 3.608251  | 0.560837  |
| C | 1.335370  | 2.765036  | 1.160599  |
| O | 0.854951  | 1.549858  | 1.759918  |
| C | 0.371040  | 1.681537  | 3.095884  |
| C | 0.017442  | 0.312100  | 3.629467  |
| O | -1.083859 | -0.203003 | 2.889056  |
| C | -1.498276 | -1.493579 | 3.311539  |
| C | -2.741684 | -1.888444 | 2.549100  |
| O | -2.438841 | -2.044973 | 1.159989  |
| C | -3.579225 | -2.440398 | 0.396326  |
| C | -3.184539 | -2.606397 | -1.061276 |
| O | -2.729511 | -1.404365 | -1.675330 |
| H | -4.400123 | -0.210780 | -1.292786 |
| H | -4.387962 | -1.039244 | -2.868672 |
| H | -3.924702 | 1.286143  | -3.234335 |
| H | -2.426552 | 0.378718  | -3.551507 |
| H | -1.165523 | 2.538309  | -2.992919 |
| H | -2.781407 | 3.255015  | -2.772353 |
| H | -2.271506 | 3.704521  | -0.381499 |
| H | -1.156073 | 4.526563  | -1.499833 |
| H | -0.536186 | 3.868301  | 1.310008  |
| H | 0.659658  | 4.545645  | 0.185314  |
| H | 2.031612  | 2.452252  | 0.381446  |
| H | 1.884557  | 3.352419  | 1.905587  |
| H | 1.152267  | 2.120355  | 3.729558  |
| H | -0.512171 | 2.330798  | 3.131935  |
| H | 0.882861  | -0.359250 | 3.543912  |
| H | -0.245990 | 0.400312  | 4.692694  |
| H | -1.736927 | -1.489656 | 4.384501  |
| H | -0.697894 | -2.228462 | 3.145252  |
| H | -3.122643 | -2.835552 | 2.953155  |
| H | -3.515083 | -1.120218 | 2.675674  |
| H | -4.378657 | -1.696689 | 0.512695  |
| H | -3.961448 | -3.401560 | 0.767011  |
| H | -4.034883 | -3.025467 | -1.615184 |
| H | -2.355112 | -3.313689 | -1.134017 |
| C | 2.275301  | -2.546883 | -1.159145 |
| C | 1.350183  | -1.710491 | -0.253737 |
| C | 0.430364  | -0.771742 | -1.032329 |
| N | -0.554646 | -0.098753 | -0.127355 |
| C | 3.279920  | -1.796382 | -2.054717 |
| C | 4.447411  | -1.069964 | -1.355584 |
| H | 5.091218  | -0.671961 | -2.147248 |
| C | 3.988816  | 0.191536  | -0.592698 |
| O | 3.171399  | 0.965554  | -1.033971 |

|   |           |           |           |
|---|-----------|-----------|-----------|
| O | 4.593614  | 0.374388  | 0.580242  |
| N | 5.291571  | -1.891036 | -0.471936 |
| H | 1.650834  | -3.159134 | -1.819145 |
| H | 2.803915  | -3.270405 | -0.527327 |
| H | 0.736353  | -2.408007 | 0.327746  |
| H | 1.927685  | -1.129539 | 0.472097  |
| H | 0.999637  | 0.017977  | -1.521251 |
| H | -0.151260 | -1.314046 | -1.779136 |
| H | -0.079165 | 0.484129  | 0.586372  |
| H | -1.158799 | -0.778742 | 0.357005  |
| H | 3.720331  | -2.523419 | -2.743961 |
| H | 2.761256  | -1.062597 | -2.675916 |
| H | 5.194919  | -0.401886 | 0.683045  |
| H | 4.802096  | -2.699001 | -0.103089 |
| H | 6.130202  | -2.220273 | -0.934572 |
| H | -1.177051 | 0.521017  | -0.670099 |

H<sup>+</sup>K[Ne]-cgg.g.tt(+00/-00/+0+/-00/-00/+0+) 1158

|   |           |           |           |
|---|-----------|-----------|-----------|
| C | 3.745910  | 2.535519  | -0.607584 |
| C | 4.192918  | 1.356238  | -1.441384 |
| O | 3.711140  | 0.147550  | -0.849206 |
| C | 4.274092  | -1.035075 | -1.422676 |
| C | 3.839889  | -2.240149 | -0.618874 |
| O | 2.438288  | -2.429280 | -0.785226 |
| C | 1.896521  | -3.555518 | -0.097505 |
| C | 1.597472  | -3.294887 | 1.369307  |
| O | 0.602783  | -2.277168 | 1.479238  |
| C | 0.203090  | -2.037663 | 2.835580  |
| C | -0.867426 | -0.972833 | 2.885449  |
| O | -0.309845 | 0.263775  | 2.443874  |
| C | -1.210742 | 1.361042  | 2.566000  |
| C | -0.522421 | 2.613514  | 2.075122  |
| O | -0.271506 | 2.497954  | 0.667067  |
| C | 0.294150  | 3.664723  | 0.061687  |
| C | 1.810504  | 3.704040  | 0.130407  |
| O | 2.326853  | 2.624288  | -0.639410 |
| H | 4.197246  | 3.449065  | -1.019317 |
| H | 4.094903  | 2.415174  | 0.426917  |
| H | 5.289777  | 1.343160  | -1.472683 |
| H | 3.818727  | 1.448211  | -2.469192 |
| H | 5.369415  | -0.970335 | -1.399398 |
| H | 3.954673  | -1.139849 | -2.467539 |
| H | 4.096048  | -2.085678 | 0.436583  |
| H | 4.385377  | -3.122006 | -0.981908 |
| H | 2.572185  | -4.416831 | -0.178314 |
| H | 0.968635  | -3.805384 | -0.616642 |
| H | 2.500167  | -2.993708 | 1.917718  |
| H | 1.228910  | -4.226687 | 1.819559  |
| H | 1.074804  | -1.725084 | 3.424550  |
| H | -0.196386 | -2.964138 | 3.266919  |
| H | -1.209834 | -0.883703 | 3.926090  |
| H | -1.730435 | -1.247590 | 2.267080  |



H<sup>+</sup>K[Ne]-cggg.tt(-00/+00/--0/-00/+00/--0) 5206

|   |           |           |           |
|---|-----------|-----------|-----------|
| C | 0.066921  | 3.384039  | 1.248671  |
| C | 1.249750  | 2.467005  | 1.501153  |
| O | 0.855409  | 1.126156  | 1.832851  |
| C | 0.546756  | 0.899161  | 3.207855  |
| C | 0.315533  | -0.580375 | 3.417259  |
| O | -0.847650 | -0.973067 | 2.696307  |
| C | -1.136763 | -2.359889 | 2.798903  |
| C | -2.450995 | -2.647754 | 2.110790  |
| O | -2.332430 | -2.419906 | 0.703696  |
| C | -3.546039 | -2.693689 | 0.002071  |
| C | -3.346984 | -2.432092 | -1.481344 |
| O | -3.035485 | -1.076641 | -1.791347 |
| C | -4.155552 | -0.198635 | -1.857660 |
| C | -3.676602 | 1.184733  | -2.236878 |
| O | -2.892404 | 1.728511  | -1.173294 |
| C | -2.490500 | 3.082449  | -1.403115 |
| C | -1.836649 | 3.635961  | -0.157035 |
| O | -0.646634 | 2.909108  | 0.110734  |
| H | 0.440683  | 4.401867  | 1.067620  |
| H | -0.602602 | 3.422971  | 2.119525  |
| H | 1.870271  | 2.879881  | 2.304776  |
| H | 1.867920  | 2.380159  | 0.606342  |
| H | -0.346427 | 1.460629  | 3.507989  |
| H | 1.388698  | 1.220932  | 3.833617  |
| H | 0.182585  | -0.774387 | 4.490685  |
| H | 1.189651  | -1.147270 | 3.069551  |
| H | -0.330603 | -2.954699 | 2.346684  |
| H | -1.227254 | -2.657190 | 3.853230  |
| H | -3.237383 | -2.004472 | 2.525683  |
| H | -2.726290 | -3.694811 | 2.292950  |
| H | -4.358148 | -2.078657 | 0.412002  |
| H | -3.825620 | -3.747672 | 0.136953  |
| H | -4.244855 | -2.755730 | -2.023955 |
| H | -2.503449 | -3.023877 | -1.844041 |
| H | -4.680751 | -0.151730 | -0.895584 |
| H | -4.863692 | -0.548555 | -2.621291 |
| H | -4.550834 | 1.824081  | -2.415549 |
| H | -3.085024 | 1.140838  | -3.160451 |
| H | -3.369882 | 3.693926  | -1.642647 |
| H | -1.795188 | 3.127812  | -2.251077 |
| H | -2.527153 | 3.562393  | 0.694605  |
| H | -1.611258 | 4.698554  | -0.325167 |
| C | 2.312725  | -1.390127 | -2.145483 |
| C | 1.344967  | -1.186352 | -0.965120 |
| C | 0.165737  | -0.305994 | -1.364694 |
| N | -0.763791 | -0.062862 | -0.217536 |
| C | 3.730099  | -1.831404 | -1.729436 |
| C | 4.756585  | -0.688160 | -1.546383 |
| H | 4.882185  | -0.183955 | -2.510139 |
| C | 4.242701  | 0.383769  | -0.566279 |
| O | 3.414442  | 1.210786  | -0.865985 |

|   |           |           |           |
|---|-----------|-----------|-----------|
| O | 4.764924  | 0.299731  | 0.660310  |
| N | 6.018950  | -1.234218 | -1.022429 |
| H | 1.893414  | -2.141160 | -2.821450 |
| H | 2.383863  | -0.463166 | -2.722003 |
| H | 0.985664  | -2.160446 | -0.612503 |
| H | 1.857137  | -0.710928 | -0.125891 |
| H | 0.525551  | 0.671537  | -1.688975 |
| H | -0.425236 | -0.746567 | -2.168615 |
| H | -1.504096 | 0.600506  | -0.496152 |
| H | -1.233486 | -0.923240 | 0.099976  |
| H | 4.144513  | -2.491852 | -2.497538 |
| H | 3.687425  | -2.419841 | -0.805000 |
| H | 5.457400  | -0.400046 | 0.599961  |
| H | 6.828831  | -0.733703 | -1.373669 |
| H | 6.139017  | -2.214685 | -1.251013 |
| H | -0.253216 | 0.348829  | 0.584489  |

H<sup>+</sup>K[Ne]-ctgg.g.t(+0+/-00/-00/+0+/-00) 3671

|   |           |           |           |
|---|-----------|-----------|-----------|
| C | -4.323025 | -1.169372 | -0.929719 |
| C | -4.286481 | 0.208168  | -1.548941 |
| O | -3.503262 | 1.067364  | -0.730677 |
| C | -3.519534 | 2.424524  | -1.153730 |
| C | -2.717825 | 3.251774  | -0.176073 |
| O | -1.340820 | 2.874805  | -0.258810 |
| C | -0.467267 | 3.634022  | 0.585987  |
| C | -0.359536 | 3.081228  | 1.995922  |
| O | 0.239752  | 1.796173  | 1.933441  |
| C | 0.364079  | 1.167701  | 3.206138  |
| C | 0.989984  | -0.196812 | 3.035114  |
| O | 0.107315  | -1.025501 | 2.270737  |
| C | 0.507228  | -2.402752 | 2.255366  |
| C | -0.572195 | -3.230363 | 1.597126  |
| O | -0.633481 | -2.906143 | 0.209571  |
| C | -1.594001 | -3.642796 | -0.536633 |
| C | -3.001734 | -3.081812 | -0.431375 |
| O | -3.017689 | -1.749383 | -0.949653 |
| H | -4.687036 | -1.105453 | 0.103735  |
| H | -5.016203 | -1.797825 | -1.504068 |
| H | -5.316813 | 0.583611  | -1.621433 |
| H | -3.869808 | 0.159646  | -2.564729 |
| H | -4.550043 | 2.805678  | -1.176789 |
| H | -3.097124 | 2.518371  | -2.163854 |
| H | -2.824425 | 4.313516  | -0.432734 |
| H | -3.102366 | 3.096575  | 0.838766  |
| H | -0.796833 | 4.678984  | 0.622346  |
| H | 0.515037  | 3.603612  | 0.110613  |
| H | -1.347214 | 3.018144  | 2.474437  |
| H | 0.257658  | 3.766437  | 2.595611  |
| H | -0.625117 | 1.072073  | 3.674213  |
| H | 1.003001  | 1.769826  | 3.866912  |
| H | 1.962400  | -0.126119 | 2.536691  |
| H | 1.138888  | -0.636395 | 4.030048  |



|                                                          |           |           |           |   |           |           |           |
|----------------------------------------------------------|-----------|-----------|-----------|---|-----------|-----------|-----------|
| H                                                        | 1.457449  | -2.507307 | 1.723713  | C | -2.059611 | -3.579471 | 0.320207  |
| H                                                        | 0.632771  | -2.754720 | 3.287749  | H | 0.777024  | -0.672124 | 3.133836  |
| H                                                        | -1.534737 | -3.038455 | 2.088088  | H | -0.118379 | -0.296928 | 4.622845  |
| H                                                        | -0.325828 | -4.293847 | 1.720895  | H | -0.643492 | -2.557270 | 3.971136  |
| H                                                        | -1.604596 | -4.696057 | -0.226396 | H | -2.093369 | -1.543580 | 3.761301  |
| H                                                        | -1.264946 | -3.602143 | -1.577710 | H | 0.807405  | 1.803485  | 2.636301  |
| H                                                        | -3.356374 | -3.078187 | 0.607641  | H | -0.091622 | 2.056066  | 4.148980  |
| H                                                        | -3.680973 | -3.716761 | -1.016352 | H | -0.563916 | 3.897742  | 2.664990  |
| C                                                        | 2.388106  | 0.650750  | -2.679459 | H | -2.038757 | 2.917488  | 2.860429  |
| C                                                        | 1.355214  | 0.871840  | -1.557768 | H | -1.393426 | 4.723664  | 0.514973  |
| C                                                        | 0.333140  | -0.259073 | -1.458148 | H | -2.870881 | 3.774328  | 0.815767  |
| N                                                        | -0.660219 | -0.020975 | -0.359140 | H | -0.968834 | 3.355196  | -1.548695 |
| C                                                        | 3.371315  | -0.526817 | -2.528768 | H | -2.480084 | 4.290147  | -1.590166 |
| C                                                        | 4.443705  | -0.408148 | -1.426149 | H | -2.092266 | 1.778271  | -3.212502 |
| H                                                        | 5.081798  | -1.294662 | -1.507106 | H | -3.560105 | 2.776024  | -3.103159 |
| C                                                        | 3.844057  | -0.517041 | -0.008542 | H | -4.198986 | 0.525005  | -3.711468 |
| O                                                        | 2.983827  | -1.314339 | 0.284044  | H | -4.784047 | 0.869036  | -2.063923 |
| O                                                        | 4.371467  | 0.327131  | 0.878038  | H | -4.227922 | -1.847040 | -3.230930 |
| N                                                        | 5.319203  | 0.773848  | -1.491180 | H | -4.812941 | -1.508917 | -1.582049 |
| H                                                        | 1.851327  | 0.508241  | -3.624084 | H | -2.148060 | -2.855689 | -2.272316 |
| H                                                        | 2.943814  | 1.585743  | -2.816998 | H | -3.638853 | -3.698623 | -1.793379 |
| H                                                        | 0.822742  | 1.805076  | -1.769098 | H | -1.503748 | -4.136584 | 2.309892  |
| H                                                        | 1.842368  | 1.009394  | -0.589296 | H | -2.955856 | -3.108905 | 2.211541  |
| H                                                        | -0.232122 | -0.343762 | -2.389081 | H | -1.060211 | -3.694989 | -0.122935 |
| H                                                        | 0.801139  | -1.218360 | -1.244738 | H | -2.595445 | -4.530925 | 0.198858  |
| H                                                        | -0.270933 | -0.268340 | 0.568360  | O | 7.420502  | -0.547683 | -0.711780 |
| H                                                        | -0.970223 | 0.962814  | -0.323151 | C | 6.351372  | 0.268761  | -0.582607 |
| H                                                        | 3.899269  | -0.648612 | -3.479497 | H | 8.175814  | -0.106343 | -0.292429 |
| H                                                        | 2.828008  | -1.459115 | -2.358696 | C | 5.087594  | -0.290133 | -1.259375 |
| H                                                        | 5.033780  | 0.854087  | 0.368543  | O | 6.405344  | 1.332219  | -0.017163 |
| H                                                        | 4.890061  | 1.552594  | -1.978923 | N | 5.131126  | -1.681975 | -1.690740 |
| H                                                        | 6.204172  | 0.575093  | -1.941790 | H | 4.972609  | 0.327564  | -2.159752 |
| H                                                        | -1.493103 | -0.614478 | -0.495211 | C | 3.867336  | -0.034779 | -0.356109 |
| H <sup>+</sup> K[Ne]-tttttt(-00/+00/-00/+00/-00/+00) 4.3 |           |           |           |   |           |           |           |
| O                                                        | -0.859694 | 0.587601  | 2.894375  | H | 5.838261  | -1.823599 | -2.403641 |
| C                                                        | -0.226246 | -0.503662 | 3.549063  | H | 5.374649  | -2.293091 | -0.916943 |
| C                                                        | -1.081615 | -1.738998 | 3.384968  | H | 3.916942  | -0.724557 | 0.496877  |
| C                                                        | -0.197843 | 1.832802  | 3.078405  | H | 3.943717  | 0.976002  | 0.051211  |
| C                                                        | -1.024535 | 2.926561  | 2.442324  | C | 2.537185  | -0.216283 | -1.091711 |
| O                                                        | -1.086816 | 2.735220  | 1.025790  | H | 2.481557  | 0.509226  | -1.913200 |
| C                                                        | -1.866459 | 3.742882  | 0.375747  | H | 2.513822  | -1.209021 | -1.550575 |
| C                                                        | -1.969538 | 3.447970  | -1.103227 | C | 1.326805  | -0.031142 | -0.168085 |
| O                                                        | -2.709637 | 2.247067  | -1.281543 | H | 1.368764  | -0.765334 | 0.644035  |
| C                                                        | -3.013795 | 1.944583  | -2.636898 | H | 1.359965  | 0.961992  | 0.293144  |
| C                                                        | -3.886999 | 0.710940  | -2.675552 | C | 0.013277  | -0.190774 | -0.924275 |
| O                                                        | -3.154471 | -0.412648 | -2.181204 | H | -0.066236 | 0.539922  | -1.730841 |
| C                                                        | -3.915441 | -1.622572 | -2.202824 | H | -0.065165 | -1.183575 | -1.370023 |
| C                                                        | -3.071423 | -2.764269 | -1.683224 | N | -1.187242 | -0.006290 | -0.048898 |
| O                                                        | -2.769791 | -2.524108 | -0.314732 | H | -2.040062 | -0.110756 | -0.620230 |
| O                                                        | -1.145970 | -2.114455 | 2.005797  | H | -1.217355 | -0.709595 | 0.707083  |
| C                                                        | -1.953891 | -3.276444 | 1.797413  | H | -1.200476 | 0.932611  | 0.381629  |

H<sup>+</sup>K[Ne]-tgggtt(-00/+00/-00/+00/-00/+00) 213

|   |           |           |           |
|---|-----------|-----------|-----------|
| C | -1.374903 | 1.538851  | 2.453247  |
| C | -1.185078 | 0.211227  | 3.152352  |
| O | -0.909150 | -0.801826 | 2.188303  |
| C | -0.597194 | -2.061952 | 2.772635  |
| C | -0.198648 | -3.044438 | 1.693118  |
| O | 1.035948  | -2.623264 | 1.101458  |
| C | 1.625818  | -3.586700 | 0.225141  |
| C | 3.045669  | -3.169825 | -0.090755 |
| O | 3.038496  | -1.945667 | -0.818855 |
| C | 4.345753  | -1.434783 | -1.059033 |
| C | 4.252956  | -0.095569 | -1.755986 |
| O | 3.656246  | 0.860637  | -0.876314 |
| C | 3.677655  | 2.199555  | -1.378414 |
| C | 3.183453  | 3.145017  | -0.306333 |
| O | 1.812106  | 2.881368  | -0.029990 |
| C | 1.296962  | 3.676683  | 1.033878  |
| C | -0.125349 | 3.264743  | 1.343470  |
| O | -0.131843 | 1.929029  | 1.852664  |
| H | -2.163808 | 1.476556  | 1.695073  |
| H | -1.669962 | 2.286097  | 3.200770  |
| H | -2.101070 | -0.030303 | 3.709308  |
| H | -0.355517 | 0.282876  | 3.868199  |
| H | 0.224916  | -1.950337 | 3.491997  |
| H | -1.469786 | -2.462353 | 3.307653  |
| H | -0.982899 | -3.119735 | 0.929754  |
| H | -0.066791 | -4.032247 | 2.152125  |
| H | 1.033854  | -3.677609 | -0.694995 |
| H | 1.651563  | -4.568432 | 0.714355  |
| H | 3.609986  | -3.048115 | 0.843232  |
| H | 3.524134  | -3.963132 | -0.681826 |
| H | 4.886441  | -1.320782 | -0.110124 |
| H | 4.914251  | -2.124820 | -1.698055 |
| H | 5.265893  | 0.230054  | -2.024731 |
| H | 3.663619  | -0.181195 | -2.678428 |
| H | 3.052679  | 2.276822  | -2.277760 |
| H | 4.704346  | 2.478084  | -1.647693 |
| H | 3.783054  | 3.017222  | 0.604748  |
| H | 3.311415  | 4.177492  | -0.660318 |
| H | 1.304527  | 4.739087  | 0.752854  |
| H | 1.919391  | 3.552450  | 1.929798  |
| H | -0.756145 | 3.334687  | 0.448128  |
| H | -0.527605 | 3.951247  | 2.099075  |
| C | -2.010834 | -0.223408 | -2.437412 |
| C | -1.132739 | -0.516094 | -1.214544 |
| C | 0.255043  | 0.103383  | -1.337188 |
| N | 1.003403  | 0.043493  | -0.041415 |
| C | -3.339592 | -0.995740 | -2.488687 |
| C | -4.313659 | -0.840779 | -1.286805 |
| H | -5.277379 | -1.224406 | -1.629524 |
| C | -4.510672 | 0.640284  | -0.963740 |
| O | -3.981172 | 1.228340  | -0.047734 |

|   |           |           |           |
|---|-----------|-----------|-----------|
| O | -5.324343 | 1.247348  | -1.848090 |
| N | -3.908665 | -1.632245 | -0.125756 |
| H | -1.458274 | -0.468273 | -3.352314 |
| H | -2.205172 | 0.854832  | -2.487067 |
| H | -1.606826 | -0.124562 | -0.313675 |
| H | -1.040470 | -1.597701 | -1.075576 |
| H | 0.858533  | -0.419306 | -2.080863 |
| H | 0.200619  | 1.156700  | -1.617500 |
| H | 1.977901  | 0.346983  | -0.192426 |
| H | 1.020254  | -0.914662 | 0.345343  |
| H | -3.144396 | -2.068258 | -2.573480 |
| H | -3.871189 | -0.692436 | -3.394894 |
| H | -5.394279 | 2.184535  | -1.606788 |
| H | -4.718567 | -1.863582 | 0.439616  |
| H | -3.274980 | -1.111006 | 0.471937  |
| H | 0.576422  | 0.668360  | 0.663068  |

H<sup>+</sup>K[Ne]-ctg.ggt(+00/-00/+00/-00/+00/-00) 1433

|   |           |           |           |
|---|-----------|-----------|-----------|
| C | -0.378763 | 3.358982  | 1.744254  |
| C | 0.839670  | 2.530294  | 2.077144  |
| O | 0.441961  | 1.162668  | 2.264623  |
| C | 1.403670  | 0.378642  | 2.976561  |
| C | 0.814767  | -0.985726 | 3.252036  |
| O | 0.657035  | -1.683159 | 2.017008  |
| C | 0.100271  | -2.988260 | 2.136240  |
| C | -1.409834 | -3.012812 | 1.971006  |
| O | -1.736348 | -2.621441 | 0.633998  |
| C | -3.105412 | -2.837546 | 0.287476  |
| C | -3.286361 | -2.548387 | -1.193226 |
| O | -3.061181 | -1.181747 | -1.532770 |
| C | -4.221158 | -0.356505 | -1.467500 |
| C | -3.851977 | 1.053328  | -1.868520 |
| O | -3.020854 | 1.630548  | -0.861661 |
| C | -2.719146 | 3.011130  | -1.084807 |
| C | -2.143119 | 3.600094  | 0.182356  |
| O | -0.927512 | 2.938882  | 0.498208  |
| H | -0.082725 | 4.416209  | 1.691124  |
| H | -1.132158 | 3.251462  | 2.536407  |
| H | 1.270501  | 2.916716  | 3.009414  |
| H | 1.594611  | 2.590168  | 1.287827  |
| H | 1.633180  | 0.861269  | 3.935599  |
| H | 2.330911  | 0.291225  | 2.399434  |
| H | -0.149679 | -0.874200 | 3.764661  |
| H | 1.496073  | -1.540599 | 3.910992  |
| H | 0.363442  | -3.436656 | 3.102261  |
| H | 0.553870  | -3.595422 | 1.348762  |
| H | -1.903426 | -2.344130 | 2.688770  |
| H | -1.769351 | -4.034159 | 2.154123  |
| H | -3.756389 | -2.202745 | 0.903746  |
| H | -3.375155 | -3.884809 | 0.478841  |
| H | -4.290577 | -2.863088 | -1.503360 |
| H | -2.558885 | -3.131310 | -1.762888 |

H -4.644720 -0.348833 -0.454962  
H -4.986978 -0.731527 -2.159945  
H -4.771556 1.643909 -1.971495  
H -3.334478 1.047972 -2.836787  
H -3.635525 3.556681 -1.342833  
H -2.011011 3.111766 -1.917420  
H -2.862178 3.480805 1.004360  
H -1.971777 4.675241 0.028918  
C 2.110009 -1.235158 -2.618290  
C 1.217363 -1.164102 -1.365159  
C 0.215210 -0.011389 -1.400960  
N -0.644160 0.014893 -0.173088  
C 3.093195 -0.075025 -2.868570  
C 4.232012 0.110329 -1.844799  
H 4.877952 0.907762 -2.227703  
C 3.724477 0.667566 -0.498459  
O 2.888413 1.536573 -0.416254  
O 4.306904 0.128936 0.574315  
N 5.083370 -1.063513 -1.590408  
H 1.468809 -1.313855 -3.503323  
H 2.657305 -2.184788 -2.588306  
H 1.814758 -1.102767 -0.451766  
H 0.662201 -2.105518 -1.294388  
H -0.459201 -0.118257 -2.252510  
H 0.713747 0.955334 -1.455077  
H -1.449954 0.642870 -0.320764  
H -0.134018 0.360427 0.659804  
H 2.556222 0.874067 -2.935521  
H 3.557162 -0.233799 -3.846849  
H 4.928438 -0.549869 0.214642  
H 5.935987 -1.048751 -2.136873  
H 4.607546 -1.938847 -1.780086  
H -1.014030 -0.922438 0.047216

H<sup>+</sup>K[Ne]-tgtttg(+0+/-+00/-0/-00/+00/-00) 2021

C -0.504882 -2.696815 2.153841  
C 0.480248 -1.669403 2.662841  
O -0.014748 -0.367366 2.378579  
C 0.854234 0.671330 2.827125  
C 0.227475 2.008244 2.503891  
O 0.180925 2.173008 1.082424  
C -0.209096 3.472747 0.633014  
C -1.713092 3.674537 0.589283  
O -2.266984 2.760689 -0.349209  
C -3.684335 2.836060 -0.437055  
C -4.183188 1.779925 -1.396078  
O -3.891033 0.485889 -0.864300  
C -4.545504 -0.579280 -1.556375  
C -4.404894 -1.857074 -0.761593  
O -3.035179 -2.236880 -0.711131  
C -2.804263 -3.404633 0.066999  
C -1.310992 -3.676524 0.099028

O -0.553834 -2.634855 0.723675  
H -1.495332 -2.506533 2.583573  
H -0.173014 -3.694887 2.465809  
H 1.459570 -1.817673 2.189344  
H 0.598615 -1.805309 3.747299  
H 1.834648 0.584164 2.340678  
H 0.992612 0.604479 3.915604  
H 0.841241 2.804142 2.944125  
H -0.779639 2.064323 2.934203  
H 0.201194 3.577299 -0.373723  
H 0.246012 4.242164 1.268097  
H -1.920926 4.711071 0.286766  
H -2.164781 3.518478 1.578721  
H -3.994730 3.824285 -0.804243  
H -4.133507 2.679609 0.552926  
H -3.714258 1.901036 -2.381413  
H -5.267753 1.897768 -1.514730  
H -4.117617 -0.700822 -2.560231  
H -5.613472 -0.351054 -1.664498  
H -5.002359 -2.641963 -1.246113  
H -4.793093 -1.706580 0.254701  
H -3.311079 -4.272473 -0.379072  
H -3.206569 -3.268298 1.080364  
H -0.933170 -3.749262 -0.923015  
H -1.120841 -4.632304 0.601543  
C 2.047542 0.251628 -1.287787  
C 0.973668 -0.623141 -1.945703  
C -0.446061 -0.063570 -1.876935  
N -0.979625 -0.004460 -0.476477  
C 3.444302 -0.370079 -1.385900  
C 4.496830 0.398557 -0.556210  
H 4.459841 1.453894 -0.841963  
C 5.888894 -0.128232 -0.912540  
O 6.520161 -0.902857 -0.239254  
O 6.325003 0.355768 -2.095420  
N 4.210259 0.288781 0.874789  
H 2.057522 1.238390 -1.767893  
H 1.817104 0.420777 -0.233930  
H 1.209270 -0.763296 -3.006304  
H 0.983518 -1.622127 -1.495091  
H -1.131643 -0.697253 -2.440604  
H -0.501739 0.948214 -2.283150  
H -1.989349 0.208892 -0.494712  
H -0.519840 0.725810 0.092921  
H 3.417981 -1.405636 -1.025371  
H 3.766233 -0.406383 -2.430930  
H 7.193446 -0.036089 -2.279079  
H 4.557857 -0.608106 1.208963  
H 4.735946 0.990966 1.387252  
H -0.858147 -0.912797 0.002988

H<sup>+</sup>K[Ne]-cg.g.gtt(-00/+0/+00/-00/+00/-0) 102

|   |           |           |           |                                                       |           |           |           |
|---|-----------|-----------|-----------|-------------------------------------------------------|-----------|-----------|-----------|
| C | 4.466962  | -0.333979 | -1.387867 | N                                                     | -5.886219 | -0.649009 | -1.492630 |
| C | 4.139325  | 1.103219  | -1.723247 | H                                                     | -1.750568 | -0.798165 | -3.483830 |
| O | 3.261506  | 1.634361  | -0.728986 | H                                                     | -2.220636 | 0.706870  | -2.720138 |
| C | 2.954212  | 3.019116  | -0.918194 | H                                                     | -0.954977 | -1.746666 | -1.408551 |
| C | 2.283350  | 3.558654  | 0.324405  | H                                                     | -1.731101 | -0.511316 | -0.440195 |
| O | 1.044365  | 2.893916  | 0.526476  | H                                                     | -0.233542 | 1.232731  | -1.501271 |
| C | 0.396921  | 3.292518  | 1.732701  | H                                                     | 0.658000  | -0.077349 | -2.297386 |
| C | -0.813947 | 2.423637  | 1.982785  | H                                                     | 1.149497  | -0.964240 | -0.059840 |
| O | -0.382119 | 1.068723  | 2.182324  | H                                                     | 0.374383  | 0.348281  | 0.630245  |
| C | -1.355550 | 0.244100  | 2.830782  | H                                                     | -3.578513 | -1.844717 | -1.788705 |
| C | -0.760641 | -1.125235 | 3.067424  | H                                                     | -4.015478 | -1.191904 | -3.357854 |
| O | -0.564188 | -1.769139 | 1.809711  | H                                                     | -5.306031 | -0.599593 | 0.329478  |
| C | -0.037365 | -3.089844 | 1.884644  | H                                                     | -6.690272 | -0.038181 | -1.594145 |
| C | 1.476412  | -3.138357 | 1.765488  | H                                                     | -6.017024 | -1.437744 | -2.116203 |
| O | 1.853873  | -2.684309 | 0.462241  | H                                                     | 1.732548  | 0.578371  | -0.313816 |
| C | 3.232794  | -2.898332 | 0.155449  |                                                       |           |           |           |
| C | 3.478280  | -2.520184 | -1.295471 | H <sup>+</sup> K[Ne]-cggtag(+00/-00/+0+/-00/-00) 2151 |           |           |           |
| O | 3.296836  | -1.129536 | -1.556208 | C                                                     | 4.274380  | -1.003967 | -1.316516 |
| H | 4.842080  | -0.393667 | -0.358021 | C                                                     | 4.003520  | -2.217477 | -0.456960 |
| H | 5.258785  | -0.682505 | -2.064631 | O                                                     | 2.597794  | -2.373458 | -0.247174 |
| H | 3.671961  | 1.161416  | -2.714774 | C                                                     | 2.305426  | -3.450940 | 0.649867  |
| H | 5.069584  | 1.685408  | -1.743264 | C                                                     | 0.814619  | -3.556072 | 0.874627  |
| H | 2.305949  | 3.143588  | -1.795200 | O                                                     | 0.361908  | -2.379373 | 1.525401  |
| H | 3.878793  | 3.584430  | -1.090670 | C                                                     | -1.006657 | -2.433394 | 1.922971  |
| H | 2.126207  | 4.639418  | 0.198385  | C                                                     | -1.360599 | -1.163664 | 2.660114  |
| H | 2.938340  | 3.406724  | 1.193092  | O                                                     | -1.172963 | -0.024420 | 1.812073  |
| H | 0.074119  | 4.340587  | 1.661663  | C                                                     | -1.595698 | 1.183793  | 2.448766  |
| H | 1.096605  | 3.203086  | 2.574488  | C                                                     | -1.309080 | 2.373136  | 1.562329  |
| H | -1.528693 | 2.468535  | 1.154852  | O                                                     | 0.096912  | 2.482528  | 1.369549  |
| H | -1.312977 | 2.787362  | 2.889650  | C                                                     | 0.504849  | 3.668911  | 0.705534  |
| H | -2.263809 | 0.171561  | 2.222474  | C                                                     | 2.014215  | 3.678029  | 0.621265  |
| H | -1.621085 | 0.685526  | 3.800190  | O                                                     | 2.452696  | 2.590206  | -0.196121 |
| H | -1.455541 | -1.710611 | 3.684391  | C                                                     | 3.874765  | 2.528642  | -0.315138 |
| H | 0.187975  | -1.027514 | 3.611834  | C                                                     | 4.262004  | 1.381880  | -1.221015 |
| H | -0.477122 | -3.649034 | 1.054896  | O                                                     | 3.873270  | 0.160522  | -0.606705 |
| H | -0.340166 | -3.577561 | 2.819470  | H                                                     | 3.737011  | -1.078305 | -2.272927 |
| H | 1.809629  | -4.175339 | 1.905673  | H                                                     | 5.350388  | -0.969363 | -1.535810 |
| H | 1.959737  | -2.518811 | 2.532815  | H                                                     | 4.509991  | -2.102098 | 0.509240  |
| H | 3.481488  | -3.959417 | 0.291165  | H                                                     | 4.404978  | -3.108963 | -0.956525 |
| H | 3.866622  | -2.313106 | 0.835582  | H                                                     | 2.812100  | -3.277788 | 1.607161  |
| H | 2.761226  | -3.047464 | -1.928878 | H                                                     | 2.672854  | -4.394404 | 0.225566  |
| H | 4.486965  | -2.838648 | -1.586587 | H                                                     | 0.622673  | -4.441089 | 1.497484  |
| C | -2.171875 | -0.375299 | -2.566730 | H                                                     | 0.288253  | -3.697594 | -0.080307 |
| C | -1.228809 | -0.686033 | -1.391913 | H                                                     | -1.172523 | -3.281911 | 2.601076  |
| C | 0.028102  | 0.175449  | -1.442551 | H                                                     | -1.659270 | -2.562846 | 1.052123  |
| N | 0.871956  | 0.016515  | -0.215926 | H                                                     | -0.731478 | -1.055935 | 3.552714  |
| C | -3.601024 | -0.922451 | -2.381400 | H                                                     | -2.411596 | -1.222448 | 2.964286  |
| C | -4.617411 | 0.054349  | -1.741313 | H                                                     | -1.065252 | 1.300545  | 3.402258  |
| H | -4.732509 | 0.915572  | -2.407387 | H                                                     | -2.673574 | 1.137329  | 2.644579  |
| C | -4.100675 | 0.611882  | -0.403131 | H                                                     | -1.701133 | 3.273109  | 2.055260  |
| O | -3.277406 | 1.492371  | -0.322455 | H                                                     | -1.823628 | 2.268996  | 0.596841  |
| O | -4.609736 | 0.007647  | 0.675615  | H                                                     | 0.066843  | 3.720245  | -0.301961 |

|                                                        |           |           |           |                                                             |           |           |           |
|--------------------------------------------------------|-----------|-----------|-----------|-------------------------------------------------------------|-----------|-----------|-----------|
| H                                                      | 0.176370  | 4.557056  | 1.263056  | H                                                           | -1.260018 | -3.708018 | -0.189966 |
| H                                                      | 2.346763  | 4.629441  | 0.185934  | H                                                           | -2.593519 | -4.406193 | 0.755755  |
| H                                                      | 2.443718  | 3.584943  | 1.626582  | H                                                           | -3.437820 | -3.826767 | -1.424064 |
| H                                                      | 4.326350  | 2.390660  | 0.675373  | H                                                           | -4.167635 | -2.740046 | -0.215637 |
| H                                                      | 4.254539  | 3.465646  | -0.743395 | H                                                           | -0.186951 | -3.062439 | 1.995413  |
| H                                                      | 5.349991  | 1.406090  | -1.372503 | H                                                           | -1.583341 | -3.765668 | 2.841390  |
| H                                                      | 3.780603  | 1.491712  | -2.203333 | H                                                           | -0.600210 | -2.077021 | 4.257321  |
| C                                                      | -1.735453 | -1.140264 | -1.699258 | H                                                           | -2.201816 | -1.518540 | 3.713108  |
| C                                                      | -0.304187 | -0.899099 | -2.208236 | H                                                           | 0.112509  | 0.235840  | 4.609039  |
| C                                                      | 0.435178  | 0.292268  | -1.596670 | H                                                           | -1.538625 | 0.717358  | 4.142948  |
| N                                                      | 0.909942  | 0.057931  | -0.193733 | H                                                           | 1.012237  | 1.542304  | 2.659781  |
| C                                                      | -2.760462 | -0.135593 | -2.241839 | H                                                           | 0.153733  | 2.525030  | 3.865798  |
| C                                                      | -4.206555 | -0.355552 | -1.742870 | H                                                           | 0.414775  | 3.365833  | 0.986984  |
| H                                                      | -4.501351 | -1.389013 | -1.952874 | H                                                           | -0.471422 | 4.212918  | 2.274646  |
| C                                                      | -4.266296 | -0.177533 | -0.213315 | H                                                           | -1.437662 | 4.821720  | 0.142727  |
| O                                                      | -3.938988 | -1.033149 | 0.569463  | H                                                           | -2.612978 | 3.838597  | 1.052564  |
| O                                                      | -4.663804 | 1.042240  | 0.175899  | H                                                           | -2.513949 | 4.180385  | -1.927764 |
| N                                                      | -5.098567 | 0.637339  | -2.362224 | H                                                           | -3.683628 | 3.182092  | -1.028004 |
| H                                                      | -1.756816 | -1.130579 | -0.608895 | H                                                           | -1.659515 | 2.125526  | -3.072288 |
| H                                                      | -2.042030 | -2.147580 | -1.998552 | H                                                           | -3.374015 | 2.467520  | -3.397696 |
| H                                                      | -0.324158 | -0.741682 | -3.292334 | H                                                           | -3.830684 | -2.152051 | -3.169368 |
| H                                                      | 0.299957  | -1.798074 | -2.050284 | H                                                           | -4.612398 | -1.156214 | -1.915954 |
| H                                                      | -0.180356 | 1.192669  | -1.578349 | H                                                           | -2.126191 | -0.340625 | -3.509827 |
| H                                                      | 1.325469  | 0.522942  | -2.181348 | H                                                           | -3.795138 | 0.153818  | -3.870475 |
| H                                                      | 1.499034  | -0.788737 | -0.131448 | O                                                           | 6.941613  | 0.496213  | -1.274121 |
| H                                                      | 0.143199  | -0.030977 | 0.497967  | C                                                           | 5.782675  | 0.450870  | -0.578051 |
| H                                                      | -2.467556 | 0.893176  | -1.999999 | H                                                           | 7.536691  | 1.118686  | -0.828055 |
| H                                                      | -2.781524 | -0.203251 | -3.336455 | C                                                           | 4.820630  | -0.581640 | -1.173461 |
| H                                                      | -4.961093 | 1.496029  | -0.646230 | O                                                           | 5.581209  | 1.119935  | 0.405604  |
| H                                                      | -6.051079 | 0.295347  | -2.442212 | N                                                           | 5.276533  | -1.955041 | -0.923723 |
| H                                                      | -4.790357 | 0.905215  | -3.290358 | H                                                           | 4.823042  | -0.437646 | -2.258757 |
| H                                                      | 1.485642  | 0.865197  | 0.089284  | C                                                           | 3.403064  | -0.376838 | -0.628975 |
| H <sup>+</sup> K[Ne]-ttttgt(-00/+00/-00/+00/-00/+00) 4 |           |           |           | H                                                           | 6.138468  | -2.155372 | -1.419522 |
| O                                                      | -2.048834 | -2.471251 | 1.283324  | H                                                           | 5.444967  | -2.111390 | 0.066059  |
| C                                                      | -2.218346 | -3.480869 | 0.297040  | H                                                           | 3.406882  | -0.613386 | 0.441784  |
| C                                                      | -3.231769 | -3.009578 | -0.720602 | H                                                           | 3.158516  | 0.686752  | -0.702113 |
| C                                                      | -1.202480 | -2.854477 | 2.359686  | C                                                           | 2.360539  | -1.236376 | -1.353792 |
| C                                                      | -1.179445 | -1.745002 | 3.385923  | H                                                           | 2.251784  | -0.890571 | -2.389728 |
| O                                                      | -0.581648 | -0.571584 | 2.827377  | H                                                           | 2.734189  | -2.261242 | -1.410346 |
| C                                                      | -0.530693 | 0.510039  | 3.762795  | C                                                           | 0.983302  | -1.255850 | -0.672464 |
| C                                                      | 0.026091  | 1.748750  | 3.098882  | H                                                           | 0.337558  | -1.974016 | -1.187880 |
| O                                                      | -0.887011 | 2.183385  | 2.098761  | H                                                           | 1.095456  | -1.606300 | 0.359556  |
| C                                                      | -0.551662 | 3.431751  | 1.506215  | C                                                           | 0.296737  | 0.106892  | -0.667639 |
| C                                                      | -1.645168 | 3.818134  | 0.536110  | H                                                           | 0.888022  | 0.853612  | -0.137961 |
| O                                                      | -1.688801 | 2.876393  | -0.538556 | H                                                           | 0.141321  | 0.469013  | -1.685610 |
| C                                                      | -2.695707 | 3.183567  | -1.505351 | N                                                           | -1.044611 | 0.071517  | -0.003867 |
| C                                                      | -2.660604 | 2.162404  | -2.619774 | H                                                           | -1.473719 | 1.007891  | -0.062568 |
| O                                                      | -3.016509 | 0.892086  | -2.089776 | H                                                           | -1.679093 | -0.603837 | -0.460125 |
| O                                                      | -2.726432 | -1.875968 | -1.433330 | H                                                           | -0.963178 | -0.182995 | 0.994076  |
| C                                                      | -3.656531 | -1.385661 | -2.402912 | H <sup>+</sup> K[Ne]-tg.g.ttg.(+00/-00/+00/--0/-00/+00) 776 |           |           |           |
| C                                                      | -3.110430 | -0.140040 | -3.063027 | C                                                           | -2.510279 | -3.297143 | -0.615222 |

|   |           |           |           |                                                            |           |           |           |
|---|-----------|-----------|-----------|------------------------------------------------------------|-----------|-----------|-----------|
| C | -3.802177 | -2.500780 | -0.567883 | H                                                          | 1.930524  | -0.254090 | -0.220523 |
| O | -3.552780 | -1.198412 | -1.082824 | H                                                          | 2.437747  | 0.545180  | -1.697807 |
| C | -4.689410 | -0.344750 | -1.028636 | H                                                          | 1.080616  | -1.015751 | -3.068353 |
| C | -4.317276 | 1.022820  | -1.553925 | H                                                          | 0.611686  | -1.917112 | -1.640105 |
| O | -3.357441 | 1.621963  | -0.680946 | H                                                          | -0.081764 | 1.035587  | -2.115164 |
| C | -3.113117 | 3.002696  | -0.960117 | H                                                          | -1.149120 | -0.327705 | -2.482279 |
| C | -2.319004 | 3.608886  | 0.173975  | H                                                          | -1.091084 | -0.924225 | -0.126039 |
| O | -1.038897 | 2.993096  | 0.237477  | H                                                          | -1.736047 | 0.587494  | -0.416420 |
| C | -0.245198 | 3.460626  | 1.321724  | H                                                          | 2.981845  | -2.398482 | -1.025293 |
| C | 1.068961  | 2.700721  | 1.326472  | H                                                          | 3.606474  | -1.541651 | -2.433722 |
| O | 0.912632  | 1.291145  | 1.518155  | H                                                          | 6.143229  | 0.938762  | -2.550359 |
| C | 0.759035  | 0.869421  | 2.877722  | H                                                          | 3.964717  | 0.025423  | 1.097385  |
| C | 0.847640  | -0.638638 | 2.941196  | H                                                          | 5.035636  | -1.146662 | 1.436064  |
| O | -0.281134 | -1.199433 | 2.275212  | H                                                          | -0.207233 | 0.453367  | 0.228966  |
| C | -0.279810 | -2.621571 | 2.279353  |                                                            |           |           |           |
| C | -1.526162 | -3.118774 | 1.583387  | H <sup>+</sup> K[Ne]-ctg.tg.g.(-00/+0/+00/-00/+0/+00) 6333 |           |           |           |
| O | -1.470160 | -2.749203 | 0.201003  | C                                                          | -1.089260 | 2.761345  | 1.525499  |
| H | -2.708124 | -4.335704 | -0.324819 | C                                                          | 0.317527  | 3.290565  | 1.737185  |
| H | -2.120811 | -3.298604 | -1.635460 | O                                                          | 1.126152  | 2.897313  | 0.634993  |
| H | -4.190984 | -2.433285 | 0.457552  | C                                                          | 2.480721  | 3.310925  | 0.762367  |
| H | -4.557235 | -3.018174 | -1.177151 | C                                                          | 3.270072  | 2.815610  | -0.427148 |
| H | -5.503097 | -0.750571 | -1.645718 | O                                                          | 3.286161  | 1.387400  | -0.419623 |
| H | -5.050095 | -0.260090 | 0.005210  | C                                                          | 4.244224  | 0.824186  | -1.318386 |
| H | -5.222588 | 1.642003  | -1.591394 | C                                                          | 4.353677  | -0.663814 | -1.074111 |
| H | -3.911235 | 0.946995  | -2.571281 | O                                                          | 3.132682  | -1.286099 | -1.457364 |
| H | -4.066530 | 3.539043  | -1.046527 | C                                                          | 3.102629  | -2.703811 | -1.308769 |
| H | -2.572015 | 3.107982  | -1.909594 | C                                                          | 2.788015  | -3.165548 | 0.103793  |
| H | -2.217532 | 4.688791  | -0.002882 | O                                                          | 1.488534  | -2.707595 | 0.474579  |
| H | -2.855672 | 3.463906  | 1.121218  | C                                                          | 1.058514  | -3.226720 | 1.738359  |
| H | -0.030368 | 4.532939  | 1.208251  | C                                                          | -0.319991 | -2.705383 | 2.068084  |
| H | -0.786527 | 3.327518  | 2.268612  | O                                                          | -0.244479 | -1.296357 | 2.264417  |
| H | 1.564873  | 2.816145  | 0.360731  | C                                                          | -1.467572 | -0.734667 | 2.733234  |
| H | 1.729161  | 3.113880  | 2.098216  | C                                                          | -1.304505 | 0.761934  | 2.849225  |
| H | -0.202382 | 1.205373  | 3.283782  | O                                                          | -1.173951 | 1.334655  | 1.539599  |
| H | 1.564280  | 1.298642  | 3.487166  | H                                                          | -1.448815 | 3.079667  | 0.544263  |
| H | 1.777587  | -0.984181 | 2.471071  | H                                                          | -1.756877 | 3.184368  | 2.285748  |
| H | 0.854551  | -0.945014 | 3.996797  | H                                                          | 0.746520  | 2.910453  | 2.674316  |
| H | -0.278861 | -3.001804 | 3.310682  | H                                                          | 0.275521  | 4.387170  | 1.808839  |
| H | 0.615738  | -3.003207 | 1.771518  | H                                                          | 2.913030  | 2.908664  | 1.688423  |
| H | -2.414756 | -2.691797 | 2.063095  | H                                                          | 2.545664  | 4.407505  | 0.799442  |
| H | -1.572013 | -4.211609 | 1.669067  | H                                                          | 4.294808  | 3.201406  | -0.352147 |
| C | 2.144520  | -0.425062 | -1.278538 | H                                                          | 2.831156  | 3.185549  | -1.363066 |
| C | 0.881040  | -0.916091 | -1.996118 | H                                                          | 3.950998  | 1.017913  | -2.358368 |
| C | -0.328004 | 0.006280  | -1.847175 | H                                                          | 5.226452  | 1.282336  | -1.144885 |
| N | -0.865783 | 0.032473  | -0.447217 | H                                                          | 4.576699  | -0.844225 | -0.015194 |
| C | 3.305657  | -1.418547 | -1.388623 | H                                                          | 5.184164  | -1.060114 | -1.674669 |
| C | 4.546134  | -1.028170 | -0.548165 | H                                                          | 4.056054  | -3.144779 | -1.627535 |
| H | 5.290080  | -1.815994 | -0.688245 | H                                                          | 2.322701  | -3.059145 | -1.985788 |
| C | 5.151108  | 0.269930  | -1.086554 | H                                                          | 3.531524  | -2.800747 | 0.825312  |
| O | 5.043045  | 1.350385  | -0.558625 | H                                                          | 2.816170  | -4.263665 | 0.122498  |
| O | 5.799091  | 0.081349  | -2.254162 | H                                                          | 1.769736  | -2.931152 | 2.520194  |
| N | 4.217286  | -0.934124 | 0.874959  | H                                                          | 1.026093  | -4.322738 | 1.691203  |

|   |           |           |           |
|---|-----------|-----------|-----------|
| H | -0.662068 | -3.200239 | 2.988070  |
| H | -1.031654 | -2.937829 | 1.266746  |
| H | -1.709824 | -1.135543 | 3.727904  |
| H | -2.287374 | -0.980879 | 2.050444  |
| H | -0.422359 | 0.993608  | 3.457500  |
| H | -2.191109 | 1.181779  | 3.340300  |
| C | -2.070356 | 1.085622  | -1.922384 |
| C | -0.591850 | 0.967458  | -2.336233 |
| C | 0.122566  | -0.256939 | -1.754630 |
| N | 0.641611  | -0.029053 | -0.362879 |
| C | -2.961504 | 0.025748  | -2.603001 |
| C | -4.219692 | -0.356297 | -1.808935 |
| H | -4.740780 | -1.149926 | -2.355535 |
| C | -3.828581 | -1.005313 | -0.461870 |
| O | -2.866131 | -1.724414 | -0.326645 |
| O | -4.651644 | -0.713983 | 0.545907  |
| N | -5.200549 | 0.712027  | -1.557119 |
| H | -2.423451 | 2.090251  | -2.177097 |
| H | -2.143298 | 0.999711  | -0.832873 |
| H | -0.046429 | 1.873963  | -2.054241 |
| H | -0.529174 | 0.903280  | -3.427436 |
| H | -0.544950 | -1.117361 | -1.698221 |
| H | 0.991667  | -0.532688 | -2.349021 |
| H | -0.057318 | 0.382244  | 0.276994  |
| H | 0.947441  | -0.928995 | 0.044954  |
| H | -2.396176 | -0.896810 | -2.752291 |
| H | -3.260313 | 0.370387  | -3.597769 |
| H | -5.310100 | -0.082771 | 0.170724  |
| H | -5.916588 | 0.753444  | -2.272413 |
| H | -4.767777 | 1.627821  | -1.495797 |
| H | 1.466213  | 0.590513  | -0.370106 |

H<sup>+</sup>K[Ne]-cggg.tt(+0+/+00/-00/+00/--0/-00) 116

|   |           |           |           |
|---|-----------|-----------|-----------|
| C | 4.579857  | -1.155329 | -0.878229 |
| C | 4.497671  | 0.195632  | -1.550504 |
| O | 3.737110  | 1.065447  | -0.722536 |
| C | 3.666006  | 2.404677  | -1.193321 |
| C | 3.019921  | 3.260089  | -0.128263 |
| O | 1.653728  | 2.879637  | 0.047068  |
| C | 1.037339  | 3.558608  | 1.143704  |
| C | -0.439428 | 3.208061  | 1.194129  |
| O | -0.694027 | 1.825380  | 1.405952  |
| C | -0.676321 | 1.400463  | 2.766860  |
| C | -1.114564 | -0.044590 | 2.831665  |
| O | -0.139448 | -0.870336 | 2.181173  |
| C | -0.471733 | -2.264098 | 2.245819  |
| C | 0.692232  | -3.085822 | 1.741608  |
| O | 0.858937  | -2.855311 | 0.344379  |
| C | 1.884144  | -3.622560 | -0.276375 |
| C | 3.266559  | -3.004720 | -0.154125 |
| O | 3.276530  | -1.736610 | -0.813703 |
| H | 5.249514  | -1.806599 | -1.454814 |

|   |           |           |           |
|---|-----------|-----------|-----------|
| H | 4.989527  | -1.041591 | 0.133530  |
| H | 4.034845  | 0.101731  | -2.543052 |
| H | 5.516057  | 0.585636  | -1.684970 |
| H | 4.673516  | 2.796712  | -1.389589 |
| H | 3.093842  | 2.455815  | -2.130619 |
| H | 3.074700  | 4.314757  | -0.428576 |
| H | 3.564003  | 3.139176  | 0.816904  |
| H | 1.134546  | 4.645051  | 1.012129  |
| H | 1.547004  | 3.285849  | 2.077265  |
| H | -0.922844 | 3.815298  | 1.970738  |
| H | -0.901659 | 3.457004  | 0.235929  |
| H | 0.326137  | 1.508391  | 3.201303  |
| H | -1.376808 | 2.004725  | 3.359019  |
| H | -1.196061 | -0.340371 | 3.885879  |
| H | -2.090814 | -0.173752 | 2.353186  |
| H | -1.373003 | -2.456820 | 1.654341  |
| H | -0.666718 | -2.543089 | 3.289465  |
| H | 1.601750  | -2.818720 | 2.294883  |
| H | 0.476201  | -4.147632 | 1.922237  |
| H | 1.614044  | -3.692369 | -1.332808 |
| H | 1.909143  | -4.640400 | 0.134019  |
| H | 3.994038  | -3.677128 | -0.628808 |
| H | 3.561063  | -2.877123 | 0.895964  |
| C | -2.311878 | -0.169502 | -2.526353 |
| C | -1.307557 | 0.413503  | -1.519581 |
| C | 0.015866  | -0.345446 | -1.546632 |
| N | 0.899166  | 0.005670  | -0.387440 |
| C | -3.741202 | 0.392217  | -2.385379 |
| C | -4.702992 | -0.409542 | -1.475495 |
| H | -4.790041 | -1.424463 | -1.877170 |
| C | -4.149773 | -0.557210 | -0.046073 |
| O | -3.293694 | -1.354091 | 0.257622  |
| O | -4.672702 | 0.300641  | 0.834513  |
| N | -5.997476 | 0.287465  | -1.398984 |
| H | -2.340765 | -1.258491 | -2.421352 |
| H | -1.959238 | 0.033046  | -3.542720 |
| H | -1.711645 | 0.366382  | -0.509201 |
| H | -1.135884 | 1.472689  | -1.742610 |
| H | -0.154924 | -1.419186 | -1.472248 |
| H | 0.579984  | -0.147806 | -2.460749 |
| H | 1.793222  | -0.503936 | -0.459655 |
| H | 0.456012  | -0.275507 | 0.506806  |
| H | -3.706979 | 1.430645  | -2.035121 |
| H | -4.213654 | 0.414836  | -3.372578 |
| H | -5.393076 | 0.767376  | 0.348596  |
| H | -6.774488 | -0.357273 | -1.296138 |
| H | -6.176183 | 0.857430  | -2.218261 |
| H | 1.107440  | 1.013126  | -0.322654 |

H<sup>+</sup>K[Ne]-ttg.ttg(+00/-00/+00/--0/-00/+0+) 125

|   |          |          |           |
|---|----------|----------|-----------|
| C | 3.469978 | 2.750357 | -0.814278 |
| C | 2.616071 | 3.475456 | 0.200234  |





|                                                            |           |           |           |                                                           |           |           |           |
|------------------------------------------------------------|-----------|-----------|-----------|-----------------------------------------------------------|-----------|-----------|-----------|
| H                                                          | 0.596503  | -3.950423 | 2.490188  | H                                                         | 2.448919  | -2.993210 | -2.065038 |
| H                                                          | -1.091054 | -2.458881 | 3.415031  | H                                                         | 2.238706  | -4.426964 | -1.029552 |
| H                                                          | -1.656601 | -1.968172 | 1.793898  | H                                                         | 4.294012  | -2.245522 | -0.818185 |
| H                                                          | -0.299861 | -0.128921 | 3.829991  | H                                                         | 4.208453  | -3.612902 | 0.310046  |
| H                                                          | -2.061421 | -0.258008 | 3.569141  | H                                                         | 5.270615  | -1.762613 | 1.468950  |
| C                                                          | -2.242985 | 0.381250  | -2.689438 | H                                                         | 3.673588  | -2.050205 | 2.179778  |
| C                                                          | -1.273711 | 0.736052  | -1.541041 | H                                                         | 4.741421  | 0.166220  | -0.690524 |
| C                                                          | -0.147875 | -0.285583 | -1.429109 | H                                                         | 5.724625  | 0.357985  | 0.783102  |
| N                                                          | 0.739369  | -0.027292 | -0.249637 | H                                                         | 4.229764  | 2.206300  | 1.532089  |
| C                                                          | -3.703339 | 0.798606  | -2.432854 | H                                                         | 5.050137  | 2.545101  | -0.011556 |
| C                                                          | -4.585100 | -0.254654 | -1.718688 | H                                                         | 3.244608  | 4.102202  | -0.566643 |
| H                                                          | -4.657751 | -1.134194 | -2.366727 | H                                                         | 2.394311  | 3.713396  | 0.948613  |
| C                                                          | -3.951489 | -0.746247 | -0.402054 | H                                                         | 0.900803  | 4.533255  | -0.889507 |
| O                                                          | -3.053980 | -1.553860 | -0.356681 | H                                                         | 1.354409  | 3.114160  | -1.864347 |
| O                                                          | -4.464059 | -0.179216 | 0.694569  | H                                                         | -1.774832 | 2.525283  | 0.108655  |
| N                                                          | -5.898750 | 0.333435  | -1.408667 | H                                                         | -1.307718 | 3.871824  | -0.937828 |
| H                                                          | -2.213082 | -0.696403 | -2.877065 | H                                                         | -0.664183 | 2.218632  | -2.733225 |
| H                                                          | -1.898631 | 0.859026  | -3.610464 | H                                                         | -2.371888 | 2.109788  | -2.232697 |
| H                                                          | -0.866792 | 1.741597  | -1.692163 | H                                                         | -0.596233 | -0.124632 | -3.405101 |
| H                                                          | -1.804169 | 0.753824  | -0.586880 | H                                                         | -2.340993 | -0.194503 | -3.036396 |
| H                                                          | -0.576503 | -1.278012 | -1.286898 | H                                                         | -1.340000 | -2.423317 | -2.936298 |
| H                                                          | 0.490757  | -0.302697 | -2.313264 | H                                                         | -1.950619 | -1.939078 | -1.338330 |
| H                                                          | 0.179296  | 0.152419  | 0.601993  | C                                                         | -2.031863 | -0.403069 | 1.737487  |
| H                                                          | 1.376704  | 0.770533  | -0.388223 | C                                                         | -0.812702 | 0.196055  | 2.450332  |
| H                                                          | -3.733715 | 1.733375  | -1.860402 | C                                                         | 0.543784  | -0.357507 | 2.020858  |
| H                                                          | -4.194070 | 1.005112  | -3.389273 | N                                                         | 0.938219  | -0.002867 | 0.615046  |
| H                                                          | -5.228714 | 0.356044  | 0.374209  | C                                                         | -3.344245 | 0.215569  | 2.246979  |
| H                                                          | -6.647117 | -0.350155 | -1.460062 | C                                                         | -4.599075 | -0.188503 | 1.451998  |
| H                                                          | -6.135069 | 1.096615  | -2.032979 | H                                                         | -5.443536 | 0.384387  | 1.846168  |
| H                                                          | 1.327935  | -0.857547 | -0.076391 | C                                                         | -4.458995 | 0.261585  | -0.021530 |
| H <sup>+</sup> K[Ne]-cgg.ttg(+00/-00/+00/--0/-00/+0+) 2358 |           |           |           | O                                                         | -4.132023 | 1.378980  | -0.336214 |
| C                                                          | 0.469179  | -3.253583 | -1.280935 | O                                                         | -4.722127 | -0.697066 | -0.914393 |
| C                                                          | 1.971138  | -3.367666 | -1.149943 | N                                                         | -4.937124 | -1.623840 | 1.497850  |
| O                                                          | 2.413267  | -2.614655 | -0.026648 | H                                                         | -2.031406 | -1.490603 | 1.889439  |
| C                                                          | 3.828541  | -2.600172 | 0.111903  | H                                                         | -1.946098 | -0.227757 | 0.661045  |
| C                                                          | 4.191713  | -1.705034 | 1.282562  | H                                                         | -0.895025 | 0.018573  | 3.528391  |
| O                                                          | 3.795830  | -0.341959 | 1.100749  | H                                                         | -0.810023 | 1.284678  | 2.324801  |
| C                                                          | 4.716988  | 0.467858  | 0.363309  | H                                                         | 1.327384  | 0.045323  | 2.663698  |
| C                                                          | 4.292603  | 1.914619  | 0.474848  | H                                                         | 0.581696  | -1.445755 | 2.094541  |
| O                                                          | 3.030575  | 2.075573  | -0.159048 | H                                                         | 0.708308  | 0.978544  | 0.371776  |
| C                                                          | 2.533679  | 3.407980  | -0.097345 | H                                                         | 0.509122  | -0.608956 | -0.101672 |
| C                                                          | 1.220581  | 3.484545  | -0.841321 | H                                                         | -3.267789 | 1.304540  | 2.193945  |
| O                                                          | 0.233400  | 2.716828  | -0.148099 | H                                                         | -3.502116 | -0.040018 | 3.300252  |
| C                                                          | -1.094644 | 2.826094  | -0.687672 | H                                                         | -4.971611 | -1.484423 | -0.372928 |
| C                                                          | -1.336774 | 1.954386  | -1.905293 | H                                                         | -5.786357 | -1.803667 | 2.019557  |
| O                                                          | -1.136214 | 0.592713  | -1.537176 | H                                                         | -4.198828 | -2.187393 | 1.903410  |
| C                                                          | -1.334812 | -0.313237 | -2.613860 | H                                                         | 1.961349  | -0.111984 | 0.534170  |
| C                                                          | -1.190916 | -1.727981 | -2.100792 | H <sup>+</sup> K[Ne]-ctgtgg(--0/-00/+0+/-00/-00/+00) 2960 |           |           |           |
| O                                                          | 0.120561  | -1.897050 | -1.554193 | C                                                         | -3.057681 | 3.033496  | -0.083382 |
| H                                                          | 0.145252  | -3.898150 | -2.107788 | C                                                         | -1.967173 | 3.381630  | 0.903421  |
| H                                                          | -0.027131 | -3.600144 | -0.364421 | O                                                         | -0.716993 | 2.950482  | 0.374957  |

|   |           |           |           |                                                              |           |           |           |
|---|-----------|-----------|-----------|--------------------------------------------------------------|-----------|-----------|-----------|
| C | 0.422205  | 3.313335  | 1.150129  | H                                                            | 0.090321  | 1.976283  | -1.893870 |
| C | 0.660742  | 2.428458  | 2.361509  | H                                                            | 0.585306  | 1.086138  | -3.319472 |
| O | 0.908039  | 1.086914  | 1.946716  | H                                                            | -1.009547 | -0.358442 | -2.376878 |
| C | 1.164916  | 0.221803  | 3.061814  | H                                                            | 0.489347  | -1.047590 | -1.744015 |
| C | 1.344253  | -1.202807 | 2.597283  | H                                                            | -1.061486 | -0.932434 | -0.039253 |
| O | 0.105211  | -1.673433 | 2.070780  | H                                                            | -0.003482 | 0.295266  | 0.345069  |
| C | 0.151986  | -3.033304 | 1.652198  | H                                                            | 2.420500  | -0.808384 | -2.697195 |
| C | -1.244345 | -3.468160 | 1.274864  | H                                                            | 3.232365  | 0.515450  | -3.510873 |
| O | -1.686992 | -2.737837 | 0.124720  | H                                                            | 5.390705  | -0.058206 | 0.175503  |
| C | -3.024252 | -3.059080 | -0.253607 | H                                                            | 5.939911  | 0.874570  | -2.240040 |
| C | -3.361075 | -2.360188 | -1.559984 | H                                                            | 4.788251  | 1.702952  | -1.418512 |
| O | -3.291184 | -0.937807 | -1.490652 | H                                                            | -1.477186 | 0.650066  | -0.333359 |
| C | -4.426503 | -0.305029 | -0.910648 |                                                              |           |           |           |
| C | -4.258423 | 1.194005  | -1.009610 | H <sup>+</sup> K[Ne]-cg.g.g.tg.(--0/-00/-00/--0/-0/--0) 3404 |           |           |           |
| O | -3.167676 | 1.612635  | -0.185607 | C                                                            | -1.297202 | -3.422703 | 0.916183  |
| H | -4.007004 | 3.454436  | 0.272536  | C                                                            | -1.842751 | -3.602799 | -0.490459 |
| H | -2.832547 | 3.466847  | -1.066349 | O                                                            | -2.423497 | -2.416648 | -1.030367 |
| H | -1.960372 | 4.469894  | 1.053935  | C                                                            | -3.788348 | -2.207372 | -0.682123 |
| H | -2.176452 | 2.900503  | 1.866832  | C                                                            | -4.279798 | -0.941515 | -1.346132 |
| H | 0.341229  | 4.356319  | 1.484449  | O                                                            | -3.639933 | 0.189932  | -0.752163 |
| H | 1.276166  | 3.242817  | 0.473399  | C                                                            | -4.121950 | 1.439274  | -1.251393 |
| H | -0.195896 | 2.451706  | 3.048662  | C                                                            | -3.635144 | 2.560047  | -0.362022 |
| H | 1.531233  | 2.819207  | 2.907337  | O                                                            | -2.216511 | 2.635957  | -0.424822 |
| H | 2.078645  | 0.548125  | 3.574896  | C                                                            | -1.672922 | 3.633487  | 0.431865  |
| H | 0.327506  | 0.281890  | 3.768667  | C                                                            | -0.158605 | 3.517940  | 0.419194  |
| H | 2.133548  | -1.279713 | 1.842426  | O                                                            | 0.315683  | 2.270643  | 0.933383  |
| H | 1.639964  | -1.809126 | 3.465388  | C                                                            | 0.419166  | 2.216454  | 2.363487  |
| H | 0.502011  | -3.674282 | 2.473557  | C                                                            | 0.773262  | 0.813218  | 2.797866  |
| H | 0.844293  | -3.151014 | 0.809432  | O                                                            | -0.348929 | -0.035919 | 2.548705  |
| H | -1.930436 | -3.287480 | 2.111928  | C                                                            | -0.222683 | -1.356725 | 3.067752  |
| H | -1.241802 | -4.542038 | 1.048634  | C                                                            | 0.487258  | -2.310222 | 2.112605  |
| H | -3.120701 | -4.142614 | -0.407244 | O                                                            | -0.220399 | -2.486361 | 0.872719  |
| H | -3.716271 | -2.773757 | 0.550040  | H                                                            | -0.929399 | -4.392160 | 1.278475  |
| H | -4.357652 | -2.680070 | -1.891574 | H                                                            | -2.082864 | -3.082629 | 1.602278  |
| H | -2.639392 | -2.656488 | -2.324239 | H                                                            | -2.570978 | -4.423773 | -0.495222 |
| H | -4.546881 | -0.592024 | 0.141520  | H                                                            | -1.023819 | -3.870759 | -1.161575 |
| H | -5.337785 | -0.592214 | -1.453275 | H                                                            | -3.912534 | -2.120530 | 0.404838  |
| H | -5.184171 | 1.675229  | -0.668588 | H                                                            | -4.399591 | -3.049941 | -1.033472 |
| H | -4.077741 | 1.487849  | -2.051458 | H                                                            | -5.365736 | -0.865940 | -1.204715 |
| C | 2.088765  | 1.125173  | -1.767764 | H                                                            | -4.072482 | -0.974655 | -2.423601 |
| C | 0.619146  | 1.078356  | -2.225138 | H                                                            | -5.219462 | 1.443201  | -1.247554 |
| C | -0.144362 | -0.160163 | -1.746411 | H                                                            | -3.781397 | 1.589619  | -2.284209 |
| N | -0.692274 | -0.019572 | -0.354007 | H                                                            | -3.956574 | 2.378927  | 0.672395  |
| C | 2.974819  | 0.116729  | -2.524620 | H                                                            | -4.086838 | 3.502087  | -0.703668 |
| C | 4.267014  | -0.278701 | -1.793013 | H                                                            | -2.068634 | 3.510382  | 1.448851  |
| H | 4.783147  | -1.032635 | -2.397034 | H                                                            | -1.956190 | 4.636915  | 0.082470  |
| C | 3.930093  | -1.002991 | -0.470162 | H                                                            | 0.278405  | 4.350542  | 0.983276  |
| O | 2.996905  | -1.763022 | -0.352532 | H                                                            | 0.203909  | 3.580132  | -0.609307 |
| O | 4.758779  | -0.724512 | 0.535560  | H                                                            | -0.528219 | 2.513010  | 2.826944  |
| N | 5.233597  | 0.796838  | -1.518264 | H                                                            | 1.205353  | 2.907176  | 2.693292  |
| H | 2.467203  | 2.141726  | -1.919035 | H                                                            | 0.993443  | 0.834660  | 3.874209  |
| H | 2.136452  | 0.937646  | -0.688875 | H                                                            | 1.664255  | 0.460828  | 2.267344  |

|   |           |           |           |
|---|-----------|-----------|-----------|
| H | -1.241037 | -1.697178 | 3.271904  |
| H | 0.317275  | -1.346396 | 4.024197  |
| H | 0.623463  | -3.284539 | 2.598926  |
| H | 1.468063  | -1.923816 | 1.835271  |
| C | 2.117806  | 0.882680  | -1.831694 |
| C | 1.225953  | -0.319244 | -2.171415 |
| C | -0.269927 | -0.066894 | -1.986221 |
| N | -0.691603 | -0.008013 | -0.549331 |
| C | 3.610673  | 0.673018  | -2.127025 |
| C | 4.330147  | -0.469944 | -1.372210 |
| H | 3.893264  | -1.429121 | -1.665671 |
| C | 4.113415  | -0.343094 | 0.146274  |
| O | 3.068130  | -0.634183 | 0.684329  |
| O | 5.154957  | 0.139697  | 0.816875  |
| N | 5.774240  | -0.409696 | -1.648776 |
| H | 1.986869  | 1.165079  | -0.784872 |
| H | 1.791234  | 1.742220  | -2.429148 |
| H | 1.514460  | -1.189771 | -1.574918 |
| H | 1.372312  | -0.594915 | -3.222106 |
| H | -0.853439 | -0.871638 | -2.432911 |
| H | -0.574867 | 0.875500  | -2.446211 |
| H | -0.276028 | 0.781258  | -0.025627 |
| H | -0.470870 | -0.889010 | -0.051267 |
| H | 3.744385  | 0.477402  | -3.197664 |
| H | 4.144460  | 1.605506  | -1.911031 |
| H | 5.878445  | 0.223543  | 0.151056  |
| H | 6.196422  | -1.329630 | -1.714208 |
| H | 5.986373  | 0.092543  | -2.503367 |
| H | -1.715992 | 0.111241  | -0.503120 |

H<sup>+</sup>K[Ne]-tg.g.tgg.(+0+/+00/-00/+00/-0/-00) 357

|   |           |           |           |
|---|-----------|-----------|-----------|
| C | -1.632780 | 3.578755  | 0.647519  |
| C | -2.781231 | 3.335629  | -0.305581 |
| O | -3.138020 | 1.950344  | -0.283602 |
| C | -4.275440 | 1.650816  | -1.096979 |
| C | -4.611485 | 0.181092  | -0.977760 |
| O | -3.552765 | -0.580384 | -1.550911 |
| C | -3.785903 | -1.983644 | -1.636062 |
| C | -3.558106 | -2.731025 | -0.333184 |
| O | -2.196385 | -2.587021 | 0.072605  |
| C | -1.899988 | -3.317388 | 1.266446  |
| C | -0.474933 | -3.051597 | 1.693902  |
| O | -0.350801 | -1.681862 | 2.049045  |
| C | 0.905121  | -1.353176 | 2.638475  |
| C | 0.885462  | 0.103612  | 3.039642  |
| O | 0.804901  | 0.931451  | 1.875067  |
| C | 0.808608  | 2.324719  | 2.187915  |
| C | 0.717744  | 3.134605  | 0.905254  |
| O | -0.476475 | 2.906519  | 0.159073  |
| H | -1.446870 | 4.660042  | 0.704664  |
| H | -1.905607 | 3.222863  | 1.648929  |
| H | -2.498135 | 3.632692  | -1.323200 |

|   |           |           |           |
|---|-----------|-----------|-----------|
| H | -3.639571 | 3.942871  | 0.009211  |
| H | -5.136696 | 2.241749  | -0.759568 |
| H | -4.066139 | 1.905960  | -2.143433 |
| H | -5.549835 | -0.009269 | -1.516291 |
| H | -4.761151 | -0.078307 | 0.077820  |
| H | -3.091957 | -2.354690 | -2.393499 |
| H | -4.807275 | -2.183258 | -1.985871 |
| H | -4.220505 | -2.365541 | 0.462715  |
| H | -3.789444 | -3.792316 | -0.498179 |
| H | -2.587797 | -3.014200 | 2.065773  |
| H | -2.028787 | -4.392134 | 1.084114  |
| H | -0.246128 | -3.695689 | 2.554444  |
| H | 0.225195  | -3.306366 | 0.886104  |
| H | 1.730360  | -1.550142 | 1.941815  |
| H | 1.068249  | -1.957912 | 3.541715  |
| H | 0.027408  | 0.302627  | 3.694410  |
| H | 1.804946  | 0.333192  | 3.593736  |
| H | 1.742752  | 2.591059  | 2.701066  |
| H | -0.022034 | 2.553432  | 2.868946  |
| H | 1.540963  | 2.860235  | 0.242655  |
| H | 0.819982  | 4.200050  | 1.149436  |
| C | 2.110980  | -0.392547 | -1.282226 |
| C | 0.822886  | -0.811111 | -2.001634 |
| C | -0.354278 | 0.135809  | -1.781177 |
| N | -0.923177 | 0.055806  | -0.395276 |
| C | 3.255431  | -1.388898 | -1.492305 |
| C | 4.520574  | -1.074449 | -0.656600 |
| H | 5.256029  | -1.850228 | -0.882636 |
| C | 5.119187  | 0.261431  | -1.099167 |
| O | 5.043592  | 1.289751  | -0.470745 |
| O | 5.718202  | 0.174846  | -2.303431 |
| N | 4.228946  | -1.092272 | 0.778802  |
| H | 1.927233  | -0.288006 | -0.209393 |
| H | 2.407797  | 0.600033  | -1.642325 |
| H | 1.004450  | -0.852498 | -3.080864 |
| H | 0.532773  | -1.826878 | -1.706624 |
| H | -0.065008 | 1.176104  | -1.938296 |
| H | -1.179948 | -0.095473 | -2.453491 |
| H | -1.294289 | -0.884711 | -0.190045 |
| H | -1.712615 | 0.718403  | -0.318152 |
| H | 3.528208  | -1.438326 | -2.551082 |
| H | 2.929997  | -2.390188 | -1.193922 |
| H | 6.061201  | 1.052512  | -2.534603 |
| H | 5.035826  | -1.426605 | 1.294927  |
| H | 4.064680  | -0.140470 | 1.097464  |
| H | -0.247727 | 0.309700  | 0.341170  |

H<sup>+</sup>K[Ne]-cg.gttg.(--0/-00/+0/+00/-00/+00) 2636

|   |           |          |           |
|---|-----------|----------|-----------|
| C | -0.806664 | 3.267260 | -1.455896 |
| C | -2.008194 | 3.513141 | -0.572345 |
| O | -2.623262 | 2.261564 | -0.252753 |
| C | -3.837845 | 2.401391 | 0.486651  |



H -0.756617 3.692151 -0.510557  
H -1.450966 3.315125 2.449448  
H -0.059780 4.242043 1.836447  
C 2.274709 -0.245368 -2.588415  
C 1.429952 -0.264803 -1.304545  
C -0.026051 0.104582 -1.566335  
N -0.839917 0.043165 -0.310983  
C 3.669053 -0.888138 -2.459113  
C 4.709123 -0.159261 -1.583239  
H 5.630596 -0.747710 -1.630134  
C 4.318130 -0.177818 -0.088545  
O 3.972673 -1.177781 0.490988  
O 4.393771 1.015179 0.511529  
N 5.013355 1.224877 -1.992297  
H 2.350215 0.782631 -2.966547  
H 1.743547 -0.800088 -3.370035  
H 1.468568 -1.261660 -0.857332  
H 1.836836 0.427802 -0.563145  
H -0.487693 -0.584502 -2.275815  
H -0.123725 1.114900 -1.968744  
H -1.833054 0.212266 -0.534855  
H -0.540481 0.749596 0.382136  
H 4.100568 -0.985850 -3.459929  
H 3.560094 -1.901120 -2.063403  
H 4.705882 1.632667 -0.194440  
H 4.347150 1.589712 -2.663603  
H 5.938385 1.313479 -2.395115  
H -0.755118 -0.889687 0.129437

H<sup>+</sup>K[Ne]-cgggtg(-0/-0/-0/-00/+00/-0) 5348

C -2.996834 -3.008914 -0.128376  
C -3.814447 -2.099438 -1.016803  
O -3.556539 -0.736662 -0.672543  
C -4.368989 0.192386 -1.393318  
C -4.236294 1.566036 -0.777001  
O -2.901839 2.032197 -0.933944  
C -2.679661 3.305691 -0.339100  
C -1.195510 3.621899 -0.404624  
O -0.394382 2.706757 0.347553  
C -0.281984 3.019350 1.742872  
C 0.405216 1.882209 2.463083  
O -0.464161 0.747940 2.446893  
C -0.037117 -0.344486 3.255534  
C 0.966388 -1.256737 2.557800  
O 0.424233 -1.892182 1.385836  
C -0.332438 -3.076624 1.636428  
C -0.736234 -3.689713 0.305829  
O -1.618110 -2.865550 -0.455310  
H -3.317266 -4.046342 -0.295854  
H -3.183730 -2.755814 0.922879  
H -4.878963 -2.321898 -0.867341  
H -3.568176 -2.278984 -2.071397

H -5.421407 -0.114174 -1.338509  
H -4.071212 0.213122 -2.449808  
H -4.496407 1.521207 0.288984  
H -4.942239 2.244700 -1.276123  
H -3.235646 4.085030 -0.880035  
H -3.034918 3.300971 0.700055  
H -1.021674 4.648598 -0.061463  
H -0.851344 3.549518 -1.438800  
H -1.273749 3.182091 2.179232  
H 0.310330 3.935410 1.860868  
H 0.592651 2.195872 3.499360  
H 1.364813 1.654158 1.988001  
H -0.945204 -0.892856 3.518565  
H 0.408938 0.019949 4.191153  
H 1.317525 -2.022400 3.260883  
H 1.829937 -0.688921 2.209920  
H -1.214655 -2.853680 2.249445  
H 0.285272 -3.800180 2.185224  
H -1.186901 -4.674721 0.482151  
H 0.154273 -3.829392 -0.310671  
C 2.122605 -0.993449 -1.774866  
C 1.210902 0.170192 -2.189336  
C -0.279072 -0.097221 -1.974936  
N -0.695408 -0.016955 -0.538623  
C 3.612464 -0.772846 -2.077570  
C 4.311203 0.415567 -1.375367  
H 3.848138 1.352227 -1.700048  
C 4.111284 0.339696 0.148651  
O 3.059811 0.612747 0.684150  
O 5.174068 -0.080498 0.827804  
N 5.753766 0.381235 -1.664330  
H 1.991591 -1.217484 -0.713918  
H 1.813256 -1.891897 -2.321432  
H 1.488504 1.084421 -1.655971  
H 1.348304 0.374322 -3.257273  
H -0.561270 -1.090216 -2.329097  
H -0.883748 0.640041 -2.504252  
H -0.213718 -0.699686 0.069802  
H -0.550165 0.932567 -0.151997  
H 3.743851 -0.624076 -3.156046  
H 4.161731 -1.685347 -1.819307  
H 5.893857 -0.168497 0.158398  
H 5.971758 -0.154608 -2.496706  
H 6.150590 1.307886 -1.776119  
H -1.704979 -0.220454 -0.469000

H<sup>+</sup>K[Ne]-tg.g.ttg.(-00/+00/-0/-00/+00/-0) 1555

C -1.218263 -1.213872 2.409883  
C -0.984035 0.216216 2.839776  
O -0.949688 1.053957 1.688062  
C -0.730810 2.429330 1.985347  
C -0.561545 3.185010 0.679356

|   |           |           |           |                                                        |           |           |           |
|---|-----------|-----------|-----------|--------------------------------------------------------|-----------|-----------|-----------|
| O | 0.641467  | 2.832703  | -0.021725 | H                                                      | 1.320576  | -0.047751 | -2.674236 |
| C | 1.792801  | 3.581660  | 0.377946  | H                                                      | 0.433776  | -1.444748 | -2.058027 |
| C | 2.990292  | 3.140878  | -0.431724 | H                                                      | 0.406011  | -0.531533 | 0.105810  |
| O | 3.312410  | 1.798268  | -0.088632 | H                                                      | 0.872161  | 0.988887  | -0.412458 |
| C | 4.485194  | 1.310664  | -0.727480 | H                                                      | -3.675457 | 0.083620  | -2.903980 |
| C | 4.774413  | -0.084687 | -0.224487 | H                                                      | -3.112761 | 1.646174  | -2.316324 |
| O | 3.731149  | -0.971483 | -0.636983 | H                                                      | -5.727154 | -2.277519 | -0.992981 |
| C | 3.971555  | -2.328419 | -0.256855 | H                                                      | -3.376675 | 1.097661  | 0.773376  |
| C | 2.874329  | -3.212171 | -0.826034 | H                                                      | -4.834439 | 1.825365  | 0.693061  |
| O | 1.576882  | -2.905215 | -0.322659 | H                                                      | 1.929749  | -0.303087 | -0.489973 |
| C | 1.262685  | -3.510398 | 0.928704  |                                                        |           |           |           |
| C | -0.113684 | -3.063790 | 1.367518  | H <sup>+</sup> K[Ne]-tg.g.ttt(+0+/-00/-00/+0+/-00/-00) | 10625     |           |           |
| O | -0.095236 | -1.660865 | 1.638470  | C                                                      | 1.094485  | -0.340500 | 2.848984  |
| H | -2.143205 | -1.300813 | 1.828411  | C                                                      | 0.563077  | 1.062469  | 3.031924  |
| H | -1.314202 | -1.835026 | 3.309686  | O                                                      | 0.456454  | 1.699994  | 1.762614  |
| H | -0.037010 | 0.295952  | 3.390175  | C                                                      | -0.037066 | 3.030120  | 1.834216  |
| H | -1.799265 | 0.520244  | 3.510961  | C                                                      | -0.171418 | 3.567416  | 0.420365  |
| H | 0.155008  | 2.538989  | 2.625932  | O                                                      | -1.159660 | 2.874358  | -0.352055 |
| H | -1.591216 | 2.844960  | 2.528711  | C                                                      | -2.481305 | 3.411763  | -0.238627 |
| H | -0.575721 | 4.263677  | 0.872161  | C                                                      | -3.422432 | 2.627758  | -1.123763 |
| H | -1.394041 | 2.948523  | 0.014597  | O                                                      | -3.553637 | 1.308712  | -0.609058 |
| H | 1.998729  | 3.435810  | 1.444894  | C                                                      | -4.483591 | 0.506560  | -1.326192 |
| H | 1.614716  | 4.649638  | 0.199481  | C                                                      | -4.602322 | -0.836572 | -0.644162 |
| H | 3.833245  | 3.807165  | -0.201932 | O                                                      | -3.362249 | -1.540115 | -0.746827 |
| H | 2.773873  | 3.221841  | -1.505968 | C                                                      | -3.410010 | -2.838503 | -0.150807 |
| H | 5.345325  | 1.953022  | -0.493044 | C                                                      | -2.097216 | -3.558593 | -0.407322 |
| H | 4.353446  | 1.302183  | -1.818458 | O                                                      | -0.973580 | -2.924196 | 0.196409  |
| H | 4.850460  | -0.081231 | 0.870236  | C                                                      | -0.740138 | -3.282355 | 1.555628  |
| H | 5.732603  | -0.422441 | -0.639684 | C                                                      | 0.453965  | -2.512090 | 2.072550  |
| H | 4.023181  | -2.403111 | 0.837308  | O                                                      | 0.131225  | -1.119363 | 2.126396  |
| H | 4.936085  | -2.662249 | -0.662581 | H                                                      | 1.251936  | -0.783943 | 3.840630  |
| H | 3.125091  | -4.263377 | -0.634466 | H                                                      | 2.052511  | -0.328497 | 2.317432  |
| H | 2.821649  | -3.071192 | -1.908010 | H                                                      | -0.419678 | 1.033522  | 3.521896  |
| H | 1.995660  | -3.231165 | 1.695585  | H                                                      | 1.254940  | 1.617492  | 3.680783  |
| H | 1.266481  | -4.604488 | 0.827940  | H                                                      | 0.659833  | 3.671242  | 2.394052  |
| H | -0.381849 | -3.614930 | 2.277736  | H                                                      | -1.002713 | 3.050801  | 2.358742  |
| H | -0.859471 | -3.293237 | 0.596154  | H                                                      | 0.774754  | 3.436941  | -0.108960 |
| C | -1.994583 | -0.037032 | -1.534169 | H                                                      | -0.401265 | 4.638549  | 0.449352  |
| C | -0.796335 | 0.318840  | -2.420443 | H                                                      | -2.830431 | 3.367429  | 0.799821  |
| C | 0.509335  | -0.358220 | -2.014011 | H                                                      | -2.477778 | 4.460319  | -0.562030 |
| N | 0.943737  | -0.023366 | -0.614366 | H                                                      | -3.040771 | 2.602566  | -2.153795 |
| C | -3.299711 | 0.609618  | -2.021402 | H                                                      | -4.397930 | 3.133647  | -1.132532 |
| C | -4.410967 | 0.671628  | -0.946087 | H                                                      | -4.155913 | 0.376829  | -2.367009 |
| H | -5.304444 | 1.079850  | -1.423617 | H                                                      | -5.473361 | 0.983638  | -1.336358 |
| C | -4.749967 | -0.743576 | -0.472775 | H                                                      | -5.398095 | -1.415331 | -1.130635 |
| O | -4.322741 | -1.258731 | 0.534542  | H                                                      | -4.867986 | -0.698662 | 0.411743  |
| O | -5.564392 | -1.384032 | -1.334521 | H                                                      | -4.224506 | -3.422929 | -0.599822 |
| N | -4.022963 | 1.563536  | 0.142816  | H                                                      | -3.614626 | -2.745500 | 0.923982  |
| H | -2.109907 | -1.126990 | -1.496808 | H                                                      | -2.184869 | -4.597907 | -0.065782 |
| H | -1.789041 | 0.289534  | -0.512058 | H                                                      | -1.898416 | -3.573498 | -1.481515 |
| H | -0.995157 | 0.028046  | -3.457762 | H                                                      | -0.528061 | -4.357722 | 1.629577  |
| H | -0.655265 | 1.405658  | -2.429807 | H                                                      | -1.615788 | -3.058324 | 2.177900  |

|   |           |           |           |
|---|-----------|-----------|-----------|
| H | 1.326963  | -2.674800 | 1.428672  |
| H | 0.693835  | -2.874461 | 3.080262  |
| C | 2.327836  | -0.396969 | -2.623326 |
| C | 1.448883  | 0.101486  | -1.469709 |
| C | 0.019736  | -0.413011 | -1.604285 |
| N | -0.827759 | -0.040249 | -0.426354 |
| C | 3.792268  | 0.062840  | -2.571043 |
| C | 4.612568  | -0.424544 | -1.348972 |
| H | 5.662577  | -0.163747 | -1.565712 |
| C | 4.331215  | 0.338437  | -0.062926 |
| O | 4.126930  | -0.163037 | 1.017731  |
| O | 4.398526  | 1.675772  | -0.239877 |
| N | 4.414572  | -1.849754 | -1.106366 |
| H | 1.906204  | -0.055732 | -3.575927 |
| H | 2.302320  | -1.489734 | -2.637366 |
| H | 1.853323  | -0.252267 | -0.517957 |
| H | 1.450534  | 1.196238  | -1.435794 |
| H | -0.468018 | -0.011410 | -2.494913 |
| H | 0.006819  | -1.501021 | -1.661441 |
| H | -1.762949 | -0.469145 | -0.504881 |
| H | -0.414975 | -0.384352 | 0.458126  |
| H | 4.295733  | -0.317709 | -3.465503 |
| H | 3.861058  | 1.152261  | -2.623881 |
| H | 4.297095  | 2.088967  | 0.630796  |
| H | 4.772056  | -2.114136 | -0.194605 |
| H | 4.893027  | -2.403443 | -1.808423 |
| H | -0.948344 | 0.982580  | -0.347770 |

H<sup>+</sup>K[Ne]-cgg.gtt(+0/+00/--0/-00/+00/-00) 11557

|   |           |           |           |
|---|-----------|-----------|-----------|
| C | 0.915320  | -3.049874 | 2.171639  |
| C | 1.478930  | -3.515467 | 0.848056  |
| O | 2.272594  | -2.467326 | 0.283706  |
| C | 3.140530  | -2.889586 | -0.769103 |
| C | 4.089490  | -1.763664 | -1.113284 |
| O | 3.354612  | -0.695709 | -1.704851 |
| C | 4.139964  | 0.440092  | -2.064585 |
| C | 4.191032  | 1.498940  | -0.975092 |
| O | 2.872148  | 2.017297  | -0.785353 |
| C | 2.801142  | 3.181522  | 0.043895  |
| C | 1.405596  | 3.772905  | -0.073579 |
| O | 0.389696  | 2.907567  | 0.428474  |
| C | 0.014715  | 3.151573  | 1.783986  |
| C | -1.030895 | 2.143761  | 2.204683  |
| O | -0.434133 | 0.843666  | 2.252794  |
| C | -1.262790 | -0.151566 | 2.875107  |
| C | -0.425237 | -1.373137 | 3.173209  |
| O | 0.054019  | -1.941918 | 1.957714  |
| H | 0.367207  | -3.882007 | 2.636342  |
| H | 1.738876  | -2.765395 | 2.840905  |
| H | 2.102027  | -4.401205 | 1.023418  |
| H | 0.672681  | -3.793520 | 0.157026  |
| H | 3.727197  | -3.756897 | -0.440493 |

|   |           |           |           |
|---|-----------|-----------|-----------|
| H | 2.558493  | -3.180194 | -1.653424 |
| H | 4.841433  | -2.139408 | -1.820422 |
| H | 4.606037  | -1.431089 | -0.203581 |
| H | 5.161643  | 0.137799  | -2.324693 |
| H | 3.676289  | 0.868297  | -2.956352 |
| H | 4.863590  | 2.305237  | -1.295820 |
| H | 4.575805  | 1.088859  | -0.031618 |
| H | 3.532297  | 3.924807  | -0.299714 |
| H | 3.041571  | 2.919749  | 1.083000  |
| H | 1.179530  | 3.943370  | -1.129162 |
| H | 1.379443  | 4.741988  | 0.439139  |
| H | -0.408000 | 4.160793  | 1.878573  |
| H | 0.884955  | 3.076225  | 2.448866  |
| H | -1.396067 | 2.417305  | 3.202779  |
| H | -1.881286 | 2.149173  | 1.512590  |
| H | -1.649900 | 0.239050  | 3.824658  |
| H | -2.115546 | -0.398438 | 2.234020  |
| H | -1.045831 | -2.099902 | 3.715422  |
| H | 0.424045  | -1.097744 | 3.813356  |
| C | -2.296023 | -0.694273 | -2.397340 |
| C | -1.320001 | -0.793195 | -1.213526 |
| C | -0.078958 | 0.068173  | -1.420243 |
| N | 0.829130  | 0.037538  | -0.231947 |
| C | -3.646637 | -1.402751 | -2.150305 |
| C | -4.747730 | -0.560210 | -1.466266 |
| H | -5.594107 | -1.226323 | -1.273801 |
| C | -4.274838 | -0.062897 | -0.086854 |
| O | -4.080221 | -0.795581 | 0.850493  |
| O | -4.045983 | 1.257045  | -0.030481 |
| N | -5.138713 | 0.604756  | -2.282939 |
| H | -1.826170 | -1.140908 | -3.279538 |
| H | -2.464422 | 0.358808  | -2.650326 |
| H | -1.032308 | -1.839946 | -1.069023 |
| H | -1.807721 | -0.485629 | -0.287797 |
| H | 0.509323  | -0.257772 | -2.279979 |
| H | -0.354868 | 1.113278  | -1.568080 |
| H | 0.332581  | 0.306378  | 0.637190  |
| H | 1.253369  | -0.891216 | -0.080678 |
| H | -3.488763 | -2.299919 | -1.546232 |
| H | -4.061503 | -1.744139 | -3.104066 |
| H | -4.322361 | 1.600712  | -0.914420 |
| H | -4.895220 | 0.490072  | -3.260383 |
| H | -6.137352 | 0.778218  | -2.237336 |
| H | 1.596591  | 0.713071  | -0.378503 |

H<sup>+</sup>K[Ne]-ctg.ttg(-00/+00/--0/-00/+0+/-00) 483

|   |          |          |           |
|---|----------|----------|-----------|
| C | 4.424848 | 0.194088 | -1.952287 |
| C | 4.556362 | 1.364639 | -0.992491 |
| O | 3.262240 | 1.902651 | -0.718690 |
| C | 3.312874 | 3.082337 | 0.088234  |
| C | 1.909650 | 3.583831 | 0.339092  |
| O | 1.218242 | 2.619416 | 1.118746  |

|   |           |           |           |                                                          |           |           |           |
|---|-----------|-----------|-----------|----------------------------------------------------------|-----------|-----------|-----------|
| C | -0.104168 | 3.002994  | 1.478221  | H                                                        | 0.460136  | 1.010188  | -2.194039 |
| C | -0.668621 | 1.980678  | 2.437199  | H                                                        | 0.273812  | 0.301024  | 0.257794  |
| O | -0.783431 | 0.714166  | 1.789857  | H                                                        | 1.785164  | 0.659376  | -0.352024 |
| C | -1.295042 | -0.297509 | 2.662272  | H                                                        | -3.436938 | -0.817397 | -3.012535 |
| C | -1.568650 | -1.566256 | 1.875320  | H                                                        | -3.411104 | -1.536775 | -1.410016 |
| O | -0.425913 | -2.105772 | 1.208240  | H                                                        | -6.678334 | 0.217790  | -0.565853 |
| C | 0.465778  | -2.840713 | 2.036645  | H                                                        | -6.016395 | 0.196411  | -3.152413 |
| C | 1.536677  | -3.456378 | 1.165351  | H                                                        | -5.906926 | -1.229044 | -2.349372 |
| O | 2.326460  | -2.416146 | 0.582109  | H                                                        | 1.329361  | -0.920610 | -0.125799 |
| C | 3.429169  | -2.907427 | -0.182023 |                                                          |           |           |           |
| C | 4.339312  | -1.759750 | -0.556399 | H <sup>+</sup> K[Ne]-cgttgt(-00/+00/-00/+00/-00/+00) 8.4 |           |           |           |
| O | 3.647817  | -0.886804 | -1.444172 | O                                                        | -2.099855 | -2.528837 | 1.125438  |
| H | 3.917178  | 0.526495  | -2.860425 | C                                                        | -2.495288 | -3.397459 | 0.071780  |
| H | 5.428494  | -0.151740 | -2.232588 | C                                                        | -3.584895 | -2.728883 | -0.735235 |
| H | 5.187412  | 2.130167  | -1.464297 | C                                                        | -1.167868 | -3.105896 | 2.030802  |
| H | 5.040190  | 1.066558  | -0.052882 | C                                                        | -0.897360 | -2.126543 | 3.150226  |
| H | 3.804287  | 2.859291  | 1.043611  | O                                                        | -0.250973 | -0.958731 | 2.635926  |
| H | 3.889172  | 3.860629  | -0.428357 | C                                                        | 0.046933  | -0.004749 | 3.662241  |
| H | 1.390146  | 3.756813  | -0.614366 | C                                                        | 0.636106  | 1.248949  | 3.056788  |
| H | 1.967665  | 4.542698  | 0.872790  | O                                                        | -0.352552 | 1.874012  | 2.246816  |
| H | -0.737573 | 3.081998  | 0.583490  | C                                                        | 0.022212  | 3.153922  | 1.750520  |
| H | -0.097634 | 3.982004  | 1.976747  | C                                                        | -1.151431 | 3.747695  | 1.004491  |
| H | -0.011850 | 1.892920  | 3.312393  | O                                                        | -1.450678 | 2.945684  | -0.141911 |
| H | -1.658349 | 2.314554  | 2.773578  | C                                                        | -2.540409 | 3.460146  | -0.910166 |
| H | -0.581453 | -0.465716 | 3.480256  | C                                                        | -2.769446 | 2.581119  | -2.118855 |
| H | -2.245364 | 0.035516  | 3.096704  | O                                                        | -3.174939 | 1.290758  | -1.678478 |
| H | -2.003083 | -2.313418 | 2.552573  | O                                                        | -3.073577 | -1.558719 | -1.381331 |
| H | -2.299365 | -1.345260 | 1.099234  | C                                                        | -4.077766 | -0.872136 | -2.135031 |
| H | -0.072122 | -3.645670 | 2.556565  | C                                                        | -3.507492 | 0.394837  | -2.730734 |
| H | 0.930648  | -2.194818 | 2.792511  | H                                                        | -1.636103 | -3.641337 | -0.568638 |
| H | 2.174688  | -4.103182 | 1.781261  | H                                                        | -2.893243 | -4.337615 | 0.477933  |
| H | 1.077758  | -4.066761 | 0.377191  | H                                                        | -3.956029 | -3.435379 | -1.489062 |
| H | 3.066636  | -3.417017 | -1.083960 | H                                                        | -4.417997 | -2.452657 | -0.077257 |
| H | 4.002547  | -3.627707 | 0.415798  | H                                                        | -0.234147 | -3.361695 | 1.510743  |
| H | 5.234016  | -2.166358 | -1.047632 | H                                                        | -1.576822 | -4.028021 | 2.466363  |
| H | 4.654181  | -1.231629 | 0.352309  | H                                                        | -0.253356 | -2.608503 | 3.897221  |
| C | -2.051107 | 0.135461  | -1.663134 | H                                                        | -1.840650 | -1.844434 | 3.634100  |
| C | -0.835868 | -0.726020 | -2.036798 | H                                                        | 0.767645  | -0.436553 | 4.368409  |
| C | 0.510149  | -0.025182 | -1.850611 | H                                                        | -0.870316 | 0.246033  | 4.209003  |
| N | 0.989519  | 0.006945  | -0.427496 | H                                                        | 1.530788  | 1.012862  | 2.464124  |
| C | -3.381230 | -0.579591 | -1.944262 | H                                                        | 0.941400  | 1.916127  | 3.874360  |
| C | -4.642347 | 0.235768  | -1.590213 | H                                                        | 0.896749  | 3.072279  | 1.090461  |
| H | -4.486468 | 1.275889  | -1.900871 | H                                                        | 0.285908  | 3.824888  | 2.579354  |
| C | -4.892388 | 0.314018  | -0.064373 | H                                                        | -0.895429 | 4.766833  | 0.687623  |
| O | -4.004613 | 0.376135  | 0.753426  | H                                                        | -2.028096 | 3.796255  | 1.662456  |
| O | -6.179030 | 0.334804  | 0.275153  | H                                                        | -2.310270 | 4.478969  | -1.247832 |
| N | -5.883369 | -0.219490 | -2.238246 | H                                                        | -3.447906 | 3.494072  | -0.294252 |
| H | -2.013020 | 0.424793  | -0.611397 | H                                                        | -1.851899 | 2.511991  | -2.720127 |
| H | -2.020518 | 1.063209  | -2.249991 | H                                                        | -3.550847 | 3.037082  | -2.742099 |
| H | -0.841178 | -1.661127 | -1.466753 | H                                                        | -4.438463 | -1.519173 | -2.945117 |
| H | -0.903381 | -1.007287 | -3.093474 | H                                                        | -4.924372 | -0.624591 | -1.482953 |
| H | 1.297945  | -0.526526 | -2.411379 | H                                                        | -2.620810 | 0.168733  | -3.340308 |



|   |           |           |           |
|---|-----------|-----------|-----------|
| H | -4.265956 | 0.839850  | -3.389341 |
| O | 6.817680  | 0.139486  | -0.583539 |
| C | 5.525706  | 0.468122  | -0.577365 |
| H | 6.889695  | -0.658390 | -1.152350 |
| C | 4.635668  | -0.427389 | -1.478022 |
| O | 5.083880  | 1.397653  | 0.049335  |
| N | 5.382707  | -1.629390 | -1.874069 |
| H | 4.477780  | 0.170685  | -2.383310 |
| C | 3.279415  | -0.660978 | -0.797947 |
| H | 5.192267  | -2.423559 | -1.271339 |
| H | 5.213709  | -1.907354 | -2.832504 |
| H | 3.422642  | -1.346420 | 0.047923  |
| H | 2.983653  | 0.296694  | -0.365614 |
| C | 2.181362  | -1.203901 | -1.719854 |
| H | 2.105970  | -0.574703 | -2.616050 |
| H | 2.449628  | -2.204008 | -2.074104 |
| C | 0.805810  | -1.281579 | -1.031841 |
| H | 0.122785  | -1.886870 | -1.635703 |
| H | 0.913208  | -1.784904 | -0.065096 |
| C | 0.191191  | 0.100034  | -0.816794 |
| H | 0.880540  | 0.768350  | -0.302551 |
| H | -0.066440 | 0.564546  | -1.769973 |
| N | -1.055667 | 0.061824  | 0.007883  |
| H | -1.414582 | 1.024646  | 0.104031  |
| H | -1.791753 | -0.517302 | -0.427502 |
| H | -0.864747 | -0.306775 | 0.954213  |

H<sup>+</sup>K[Ne]-cgtttt(-00/+00/-00/+00/-00/+00) 13.1

|   |           |           |           |
|---|-----------|-----------|-----------|
| O | -0.743992 | 0.422899  | 2.895094  |
| C | -0.141255 | -0.721768 | 3.484448  |
| C | -1.050563 | -1.912250 | 3.283696  |
| C | -0.038235 | 1.635050  | 3.131605  |
| C | -0.843016 | 2.786316  | 2.573859  |
| O | -0.952724 | 2.668280  | 1.151384  |
| C | -1.712768 | 3.735900  | 0.577482  |
| C | -1.868766 | 3.523630  | -0.910962 |
| O | -2.651849 | 2.356546  | -1.128618 |
| C | -3.012392 | 2.139041  | -2.486399 |
| C | -3.933773 | 0.942481  | -2.558491 |
| O | -3.230706 | -0.233036 | -2.147316 |
| C | -4.042193 | -1.408988 | -2.200122 |
| C | -3.230043 | -2.607689 | -1.764931 |
| O | -2.870463 | -2.444211 | -0.399111 |
| O | -1.165782 | -2.217592 | 1.889398  |
| C | -2.030367 | -3.332302 | 1.650588  |
| C | -2.192346 | -3.559231 | 0.164817  |
| H | 0.845765  | -0.909933 | 3.040017  |
| H | -0.002739 | -0.570316 | 4.563772  |
| H | -0.632935 | -2.775465 | 3.817747  |
| H | -2.043766 | -1.694518 | 3.695194  |
| H | 0.957010  | 1.598507  | 2.668127  |
| H | 0.096457  | 1.796662  | 4.209873  |

|   |           |           |           |
|---|-----------|-----------|-----------|
| H | -0.342428 | 3.728965  | 2.829502  |
| H | -1.844936 | 2.790541  | 3.020570  |
| H | -1.200411 | 4.690595  | 0.753043  |
| H | -2.702485 | 3.778954  | 1.048571  |
| H | -0.885397 | 3.424841  | -1.392491 |
| H | -2.366607 | 4.405553  | -1.336610 |
| H | -2.117519 | 1.970756  | -3.102295 |
| H | -3.541583 | 3.013726  | -2.888666 |
| H | -4.286271 | 0.822575  | -3.591053 |
| H | -4.803248 | 1.101719  | -1.908750 |
| H | -4.397805 | -1.569904 | -3.226072 |
| H | -4.912979 | -1.289983 | -1.543520 |
| H | -2.332458 | -2.709175 | -2.391386 |
| H | -3.840274 | -3.511697 | -1.896466 |
| H | -1.604876 | -4.235012 | 2.107805  |
| H | -3.011568 | -3.142239 | 2.102668  |
| H | -1.212476 | -3.698675 | -0.314030 |
| H | -2.774924 | -4.478754 | 0.016448  |
| O | 6.285197  | 1.124735  | 0.344092  |
| C | 6.330053  | 0.246643  | -0.477239 |
| H | 5.060303  | -2.268617 | -1.467400 |
| C | 5.088678  | -0.193131 | -1.296232 |
| O | 7.451303  | -0.408332 | -0.788443 |
| N | 5.375689  | -1.457646 | -1.990088 |
| H | 4.982518  | 0.581720  | -2.064624 |
| C | 3.839024  | -0.179138 | -0.404550 |
| H | 4.980955  | -1.501794 | -2.920912 |
| H | 7.196663  | -1.074322 | -1.463087 |
| H | 3.905416  | -1.013733 | 0.306021  |
| H | 3.877278  | 0.735043  | 0.192820  |
| C | 2.512769  | -0.247569 | -1.168217 |
| H | 2.476326  | 0.567948  | -1.901414 |
| H | 2.447466  | -1.182045 | -1.738747 |
| C | 1.307516  | -0.135019 | -0.224757 |
| H | 1.334912  | -0.949546 | 0.506996  |
| H | 1.377700  | 0.802693  | 0.335986  |
| C | -0.021619 | -0.172685 | -0.969771 |
| H | -0.080590 | 0.626447  | -1.710530 |
| H | -0.156720 | -1.120189 | -1.494042 |
| N | -1.193230 | -0.005137 | -0.053962 |
| H | -2.063499 | -0.054141 | -0.606249 |
| H | -1.223744 | -0.747374 | 0.664253  |
| H | -1.165860 | 0.909597  | 0.426491  |

H<sup>+</sup>K[Ne]-cggttg(-00/+0+/-00/-00/+0+/-00) 6338

|   |           |           |          |
|---|-----------|-----------|----------|
| C | -0.295718 | 1.641408  | 2.849847 |
| C | -0.755792 | 0.202935  | 2.880401 |
| O | 0.348306  | -0.638730 | 2.542934 |
| C | 0.133590  | -2.028144 | 2.770158 |
| C | -0.511137 | -2.735076 | 1.582353 |
| O | 0.281516  | -2.652004 | 0.384605 |
| C | 1.392202  | -3.547449 | 0.329289 |

|   |           |           |           |                                                                          |           |           |           |
|---|-----------|-----------|-----------|--------------------------------------------------------------------------|-----------|-----------|-----------|
| C | 2.053186  | -3.427265 | -1.034303 | H                                                                        | 0.511337  | -0.910116 | -0.181105 |
| O | 2.607899  | -2.138288 | -1.291820 | H                                                                        | 1.738287  | 0.164680  | -0.503920 |
| C | 3.908744  | -1.922233 | -0.754044 | H                                                                        | -3.731033 | 1.017000  | -3.035163 |
| C | 4.403290  | -0.564276 | -1.199165 | H                                                                        | -4.116342 | 1.904377  | -1.567943 |
| O | 3.608027  | 0.457356  | -0.593214 | H                                                                        | -5.898020 | 0.195844  | 0.200343  |
| C | 4.045790  | 1.779066  | -0.918026 | H                                                                        | -5.981508 | 0.547051  | -2.433239 |
| C | 3.233369  | 2.786183  | -0.135398 | H                                                                        | -6.215137 | -0.990846 | -1.913311 |
| O | 1.883017  | 2.738966  | -0.585297 | H                                                                        | 0.317253  | 0.739570  | 0.101177  |
| C | 1.003463  | 3.676156  | 0.029220  |                                                                          |           |           |           |
| C | 0.625863  | 3.333339  | 1.461458  | H <sup>+</sup> K[N <sub>e</sub> ]-ttgg.g.t(+00/-00/+00/-00/+00/-00) 1073 |           |           |           |
| O | 0.007753  | 2.049616  | 1.509176  | C                                                                        | -2.186160 | 3.534719  | 0.022523  |
| H | 0.599296  | 1.753783  | 3.474069  | C                                                                        | -0.704138 | 3.738862  | 0.244775  |
| H | -1.088967 | 2.282078  | 3.256594  | O                                                                        | -0.216577 | 2.735954  | 1.142714  |
| H | -1.600263 | 0.045191  | 2.201296  | C                                                                        | 1.105156  | 2.990377  | 1.626603  |
| H | -1.095268 | -0.017884 | 3.901938  | C                                                                        | 1.419896  | 2.037741  | 2.759557  |
| H | -0.496373 | -2.184631 | 3.656106  | O                                                                        | 1.571926  | 0.699961  | 2.266193  |
| H | 1.116332  | -2.452101 | 2.991437  | C                                                                        | 1.534151  | -0.286573 | 3.309317  |
| H | -1.466847 | -2.275326 | 1.330468  | C                                                                        | 1.472719  | -1.676758 | 2.719186  |
| H | -0.688689 | -3.788838 | 1.833080  | O                                                                        | 0.214536  | -1.853037 | 2.057213  |
| H | 2.107376  | -3.331160 | 1.131990  | C                                                                        | -0.040020 | -3.205325 | 1.661399  |
| H | 1.041250  | -4.579971 | 0.459798  | C                                                                        | -1.521718 | -3.392555 | 1.422195  |
| H | 1.305898  | -3.592637 | -1.813364 | O                                                                        | -1.940971 | -2.602775 | 0.314729  |
| H | 2.824165  | -4.202687 | -1.130742 | C                                                                        | -3.345200 | -2.657812 | 0.096300  |
| H | 4.603595  | -2.687666 | -1.125889 | C                                                                        | -3.718737 | -1.706562 | -1.018513 |
| H | 3.898931  | -1.969180 | 0.342333  | O                                                                        | -3.412081 | -0.371014 | -0.611111 |
| H | 4.350182  | -0.484057 | -2.292360 | C                                                                        | -3.927412 | 0.639518  | -1.480099 |
| H | 5.450607  | -0.448001 | -0.891597 | C                                                                        | -3.782785 | 1.991228  | -0.816988 |
| H | 3.937418  | 1.956884  | -1.995579 | O                                                                        | -2.402943 | 2.307022  | -0.664100 |
| H | 5.104342  | 1.894010  | -0.651319 | H                                                                        | -2.574064 | 4.376724  | -0.567644 |
| H | 3.654301  | 3.787315  | -0.302448 | H                                                                        | -2.706527 | 3.522796  | 0.989379  |
| H | 3.302067  | 2.555327  | 0.934368  | H                                                                        | -0.550486 | 4.733156  | 0.682575  |
| H | 0.107521  | 3.688466  | -0.595085 | H                                                                        | -0.159374 | 3.692453  | -0.706707 |
| H | 1.440476  | 4.683854  | 0.012280  | H                                                                        | 1.161918  | 4.014061  | 2.018287  |
| H | -0.066521 | 4.103364  | 1.830030  | H                                                                        | 1.835101  | 2.892980  | 0.813813  |
| H | 1.505507  | 3.340788  | 2.118158  | H                                                                        | 0.605288  | 2.064760  | 3.491977  |
| C | -2.103205 | 1.138686  | -1.620012 | H                                                                        | 2.343793  | 2.360806  | 3.256771  |
| C | -1.236323 | -0.007330 | -2.159886 | H                                                                        | 0.652830  | -0.109831 | 3.936516  |
| C | 0.265703  | 0.193668  | -1.965292 | H                                                                        | 2.431057  | -0.202485 | 3.936723  |
| N | 0.713334  | 0.039511  | -0.543313 | H                                                                        | 1.555503  | -2.394986 | 3.545360  |
| C | -3.599443 | 1.015260  | -1.946657 | H                                                                        | 2.295191  | -1.848247 | 2.017939  |
| C | -4.342365 | -0.231176 | -1.410039 | H                                                                        | 0.265002  | -3.889264 | 2.463109  |
| H | -3.914936 | -1.129752 | -1.864762 | H                                                                        | 0.539429  | -3.451743 | 0.763646  |
| C | -4.137264 | -0.374143 | 0.108482  | H                                                                        | -2.079623 | -3.101494 | 2.322211  |
| O | -3.096376 | -0.760166 | 0.593446  | H                                                                        | -1.714883 | -4.456668 | 1.225640  |
| O | -5.181071 | -0.011158 | 0.846345  | H                                                                        | -3.880969 | -2.379524 | 1.013708  |
| N | -5.782747 | -0.103151 | -1.681429 | H                                                                        | -3.652063 | -3.674637 | -0.186549 |
| H | -1.756595 | 2.080379  | -2.061794 | H                                                                        | -4.793947 | -1.799173 | -1.216695 |
| H | -1.970494 | 1.236483  | -0.539762 | H                                                                        | -3.176049 | -1.956582 | -1.939465 |
| H | -1.402703 | -0.109878 | -3.238368 | H                                                                        | -4.992448 | 0.457353  | -1.671619 |
| H | -1.531429 | -0.957290 | -1.704658 | H                                                                        | -3.398190 | 0.622110  | -2.441968 |
| H | 0.829461  | -0.547267 | -2.532213 | H                                                                        | -4.276294 | 1.976477  | 0.163718  |
| H | 0.585136  | 1.185941  | -2.287367 | H                                                                        | -4.280103 | 2.746062  | -1.442019 |

C 1.289854 -1.008219 -3.267418  
 C 0.367412 -1.128716 -2.033262  
 C 0.142830 0.211535 -1.333991  
 N -0.580588 0.074662 -0.023618  
 C 2.798946 -1.228190 -3.039205  
 C 3.564066 -0.209390 -2.167098  
 H 4.631714 -0.476384 -2.253065  
 C 3.273955 -0.407749 -0.681712  
 O 3.095244 -1.488217 -0.166673  
 O 3.258407 0.741622 0.017479  
 N 3.289813 1.166418 -2.589431  
 H 1.125358 -0.042202 -3.754969  
 H 0.980590 -1.765610 -3.993304  
 H 0.783892 -1.853999 -1.329603  
 H -0.602044 -1.527009 -2.346239  
 H -0.462810 0.877890 -1.949047  
 H 1.078014 0.729304 -1.135749  
 H -0.566867 0.982477 0.466967  
 H -0.161020 -0.628515 0.606235  
 H 2.969174 -2.220328 -2.614545  
 H 3.281835 -1.229618 -4.022271  
 H 2.913822 0.564508 0.919894  
 H 3.822198 1.830458 -2.037709  
 H 3.563633 1.290413 -3.559262  
 H -1.569370 -0.186943 -0.167659

H<sup>+</sup>K[Ne]-tggg.tt(-00/+00/-00/+00/-00/+00) 6195

C -0.531423 3.650740 0.593723  
 C -2.002331 3.620434 0.246538  
 O -2.295429 2.468836 -0.551082  
 C -3.677008 2.380157 -0.907762  
 C -3.909985 1.138848 -1.738906  
 O -3.633185 -0.003076 -0.937838  
 C -3.896736 -1.245478 -1.575701  
 C -3.711706 -2.356566 -0.567469  
 O -2.341308 -2.427731 -0.160354  
 C -2.131445 -3.401307 0.866736  
 C -0.673850 -3.440806 1.265903  
 O -0.316601 -2.200036 1.864302  
 C 0.968431 -2.206967 2.474984  
 C 1.166533 -0.906001 3.219277  
 O 1.263610 0.195892 2.298200  
 C 1.247551 1.468915 2.978373  
 C 1.087225 2.601013 1.990718  
 O -0.228147 2.548146 1.441007  
 H -0.321180 4.597444 1.110270  
 H 0.082879 3.617986 -0.316065  
 H -2.256301 4.529782 -0.313138  
 H -2.602072 3.595594 1.164793  
 H -3.967634 3.263176 -1.491364  
 H -4.293030 2.342863 -0.000668  
 H -3.267945 1.149422 -2.631143

H -4.956466 1.130391 -2.073049  
 H -4.931385 -1.278639 -1.943638  
 H -3.226810 -1.388906 -2.435567  
 H -4.012300 -3.309804 -1.021060  
 H -4.347189 -2.170044 0.306841  
 H -2.425360 -4.393582 0.500455  
 H -2.749133 -3.155431 1.739408  
 H -0.039024 -3.644067 0.392889  
 H -0.538533 -4.262583 1.982434  
 H 1.756130 -2.353885 1.724042  
 H 1.039924 -3.027792 3.201939  
 H 2.082671 -0.965842 3.820102  
 H 0.318409 -0.737352 3.891609  
 H 2.185303 1.597045 3.532915  
 H 0.415483 1.479725 3.690564  
 H 1.838605 2.538590 1.195959  
 H 1.229446 3.544734 2.535683  
 C 1.957221 -1.005894 -2.719315  
 C 0.933520 -1.138728 -1.562221  
 C 0.008035 0.068659 -1.435661  
 N -0.772395 0.045751 -0.154416  
 C 3.384755 -1.434730 -2.326981  
 C 4.266205 -0.328823 -1.653883  
 H 5.135880 -0.835231 -1.225254  
 C 3.500684 0.311838 -0.511343  
 O 2.887445 1.353658 -0.606943  
 O 3.492586 -0.433808 0.606249  
 N 4.731118 0.730558 -2.534143  
 H 1.982295 0.026872 -3.084100  
 H 1.623678 -1.609172 -3.566924  
 H 0.335893 -2.045459 -1.694024  
 H 1.463736 -1.265405 -0.616261  
 H 0.584513 0.992880 -1.436824  
 H -0.715783 0.112578 -2.250838  
 H -1.404415 0.863789 -0.122008  
 H -1.346268 -0.809780 -0.072039  
 H 3.934093 -1.749941 -3.218845  
 H 3.343256 -2.309738 -1.669289  
 H 2.837018 -0.050411 1.229355  
 H 5.098748 0.368152 -3.405485  
 H 4.008642 1.414691 -2.725933  
 H -0.152657 0.096314 0.663799

H<sup>+</sup>K[Ne]-tg.gggt(-00/+00/-00/+00/-00/+00) 9.1

O 3.144363 1.482952 -1.408340  
 C 3.453284 2.813626 -0.986366  
 C 2.189168 3.512677 -0.540518  
 C 4.293815 0.767284 -1.866633  
 C 3.888816 -0.624067 -2.297751  
 O 3.413817 -1.335585 -1.162075  
 C 3.101922 -2.699079 -1.416601  
 C 2.770756 -3.377711 -0.107098

|   |           |           |           |                                                          |           |           |           |
|---|-----------|-----------|-----------|----------------------------------------------------------|-----------|-----------|-----------|
| O | 1.571853  | -2.826689 | 0.445527  | H                                                        | -5.541186 | -2.435584 | -0.524714 |
| C | 1.258531  | -3.387506 | 1.724547  | O                                                        | -5.850008 | 1.095503  | -1.703002 |
| C | -0.000671 | -2.758900 | 2.275294  | O                                                        | -4.111789 | 1.676451  | -0.401334 |
| O | 0.239940  | -1.379665 | 2.519075  | H                                                        | 0.631180  | 0.486754  | 0.800750  |
| C | -0.844156 | -0.707394 | 3.147680  | H                                                        | 1.220875  | -0.958295 | 0.192258  |
| C | -0.427208 | 0.711307  | 3.459403  | H                                                        | 1.878681  | 0.493141  | -0.313455 |
| O | -0.179372 | 1.428337  | 2.246510  | H                                                        | -4.446947 | 2.556912  | -0.635164 |
| O | 1.683066  | 2.852643  | 0.612538  |                                                          |           |           |           |
| C | 0.536977  | 3.471538  | 1.182348  | H <sup>+</sup> K[Ne]-tgttgt(-00/+0+/-00/+0+/-00/-0) 1517 |           |           |           |
| C | 0.208710  | 2.783679  | 2.487740  | C                                                        | -0.842807 | -2.174233 | 2.908875  |
| H | 4.175157  | 2.783661  | -0.160741 | C                                                        | -1.944016 | -2.894154 | 2.148786  |
| H | 3.897960  | 3.374131  | -1.818893 | O                                                        | -1.711958 | -2.726246 | 0.757385  |
| H | 2.429636  | 4.559579  | -0.309709 | C                                                        | -2.661728 | -3.381664 | -0.072389 |
| H | 1.443929  | 3.505097  | -1.348511 | C                                                        | -2.280205 | -3.128171 | -1.520344 |
| H | 5.039936  | 0.707726  | -1.064402 | O                                                        | -2.333179 | -1.745715 | -1.888926 |
| H | 4.741755  | 1.290917  | -2.721175 | C                                                        | -3.628920 | -1.287518 | -2.289238 |
| H | 4.765841  | -1.127015 | -2.727758 | C                                                        | -3.527587 | 0.124367  | -2.818096 |
| H | 3.112050  | -0.573030 | -3.073856 | O                                                        | -3.176746 | 1.000691  | -1.755044 |
| H | 3.963111  | -3.213097 | -1.865188 | C                                                        | -3.128889 | 2.368147  | -2.146496 |
| H | 2.258230  | -2.778693 | -2.116997 | C                                                        | -2.735616 | 3.204747  | -0.950759 |
| H | 3.599444  | -3.241078 | 0.598542  | O                                                        | -1.399299 | 2.862891  | -0.577890 |
| H | 2.636350  | -4.452781 | -0.283639 | C                                                        | -0.830297 | 3.659432  | 0.461629  |
| H | 2.092239  | -3.215919 | 2.416538  | C                                                        | -1.357009 | 3.316568  | 1.848750  |
| H | 1.104341  | -4.469916 | 1.626128  | O                                                        | -1.277414 | 1.906609  | 2.013121  |
| H | -0.265055 | -3.274015 | 3.209126  | C                                                        | -1.408743 | 1.457247  | 3.356601  |
| H | -0.834552 | -2.885735 | 1.570845  | C                                                        | -1.795401 | -0.006287 | 3.352815  |
| H | -1.110812 | -1.206311 | 4.089502  | O                                                        | -0.795383 | -0.764984 | 2.668718  |
| H | -1.729840 | -0.713436 | 2.497657  | H                                                        | 0.128108  | -2.559323 | 2.591949  |
| H | 0.479806  | 0.705817  | 4.076565  | H                                                        | -0.954486 | -2.367457 | 3.982867  |
| H | -1.230392 | 1.203216  | 4.023030  | H                                                        | -2.937478 | -2.508655 | 2.417770  |
| H | 0.735789  | 4.531938  | 1.389852  | H                                                        | -1.916002 | -3.958983 | 2.421239  |
| H | -0.316066 | 3.415001  | 0.491293  | H                                                        | -3.674886 | -3.015702 | 0.145303  |
| H | 1.085730  | 2.805906  | 3.146460  | H                                                        | -2.651399 | -4.465850 | 0.110114  |
| H | -0.611812 | 3.320985  | 2.980738  | H                                                        | -2.924710 | -3.718221 | -2.182288 |
| C | -2.260471 | -0.449482 | -2.081578 | H                                                        | -1.247566 | -3.444016 | -1.680986 |
| C | -3.600834 | -1.176346 | -1.883307 | H                                                        | -4.328744 | -1.316630 | -1.445722 |
| H | -1.777067 | -0.872572 | -2.969538 | H                                                        | -4.014630 | -1.936273 | -3.085647 |
| H | -2.438636 | 0.607292  | -2.307980 | H                                                        | -4.501277 | 0.407815  | -3.242005 |
| C | -1.300587 | -0.559295 | -0.887332 | H                                                        | -2.777867 | 0.174626  | -3.619449 |
| C | -4.509328 | -0.665961 | -0.731248 | H                                                        | -4.113547 | 2.698014  | -2.505937 |
| H | -3.409527 | -2.238468 | -1.688945 | H                                                        | -2.401166 | 2.507439  | -2.957181 |
| H | -4.178358 | -1.129548 | -2.811717 | H                                                        | -3.429616 | 3.018142  | -0.123027 |
| H | -1.741530 | -0.088454 | -0.004365 | H                                                        | -2.786571 | 4.267195  | -1.221130 |
| H | -1.132020 | -1.615537 | -0.648695 | H                                                        | -0.989072 | 4.725915  | 0.258265  |
| C | 0.036437  | 0.109337  | -1.187496 | H                                                        | 0.242536  | 3.462337  | 0.419057  |
| N | -5.731229 | -1.439707 | -0.538094 | H                                                        | -2.394287 | 3.649330  | 1.989938  |
| H | -3.946495 | -0.676760 | 0.205583  | H                                                        | -0.735507 | 3.838987  | 2.588731  |
| C | -4.926153 | 0.772392  | -1.004917 | H                                                        | -2.197339 | 2.016274  | 3.878204  |
| H | 0.521921  | -0.349887 | -2.050210 | H                                                        | -0.464148 | 1.606272  | 3.894963  |
| H | -0.098430 | 1.168883  | -1.410383 | H                                                        | -2.770208 | -0.129606 | 2.865204  |
| N | 1.000315  | 0.022439  | -0.045746 | H                                                        | -1.880104 | -0.351061 | 4.391323  |
| H | -6.397831 | -1.248122 | -1.280141 | C                                                        | 2.856178  | -1.124375 | -1.367455 |

|   |           |           |           |
|---|-----------|-----------|-----------|
| C | 1.421434  | -1.223968 | -0.823906 |
| C | 0.731115  | 0.135014  | -0.740585 |
| N | -0.670662 | 0.033569  | -0.221863 |
| C | 3.863270  | -0.512834 | -0.386248 |
| C | 5.237273  | -0.256707 | -1.049263 |
| H | 5.575900  | -1.187903 | -1.511990 |
| C | 6.242704  | 0.113992  | 0.042602  |
| O | 6.558116  | 1.241322  | 0.329606  |
| O | 6.719364  | -0.974820 | 0.686104  |
| N | 5.118668  | 0.767881  | -2.080487 |
| H | 3.193539  | -2.131814 | -1.632287 |
| H | 2.865261  | -0.540911 | -2.292923 |
| H | 1.423492  | -1.699336 | 0.163504  |
| H | 0.835349  | -1.872956 | -1.482646 |
| H | 0.674640  | 0.602424  | -1.725094 |
| H | 1.260301  | 0.817575  | -0.075277 |
| H | -0.691874 | -0.298378 | 0.755698  |
| H | -1.249083 | -0.606406 | -0.791809 |
| H | 3.992678  | -1.175388 | 0.475559  |
| H | 3.503331  | 0.447770  | 0.000417  |
| H | 7.327779  | -0.670453 | 1.377891  |
| H | 5.164909  | 1.689580  | -1.653038 |
| H | 5.892093  | 0.714916  | -2.734959 |
| H | -1.116909 | 0.964952  | -0.244419 |

H<sup>+</sup>K[N<sub>e</sub>]-cg.ggg.g(-00/+0+/+00/-00/+00/--0) 1831bb

|   |           |           |           |
|---|-----------|-----------|-----------|
| C | -1.033821 | 0.428091  | 3.596546  |
| C | -1.125263 | 1.793176  | 2.954343  |
| O | 0.007139  | 1.995079  | 2.108807  |
| C | 0.260472  | 3.364492  | 1.787706  |
| C | 1.659214  | 3.489270  | 1.229715  |
| O | 1.741314  | 2.762351  | 0.013200  |
| C | 3.049083  | 2.751956  | -0.548358 |
| C | 3.023681  | 1.910175  | -1.810221 |
| O | 2.712229  | 0.538619  | -1.566306 |
| C | 3.838600  | -0.297515 | -1.278313 |
| C | 3.397375  | -1.742019 | -1.246017 |
| O | 2.606489  | -1.974393 | -0.083681 |
| C | 2.123434  | -3.311328 | -0.017247 |
| C | 1.233905  | -3.459816 | 1.194798  |
| O | 0.048480  | -2.676177 | 1.001432  |
| C | -0.983124 | -2.879676 | 1.967981  |
| C | -0.919484 | -1.890938 | 3.115701  |
| O | -1.142275 | -0.581396 | 2.600852  |
| H | -1.841725 | 0.325944  | 4.335079  |
| H | -0.074035 | 0.337092  | 4.121953  |
| H | -1.136542 | 2.548610  | 3.750019  |
| H | -2.056083 | 1.891703  | 2.379473  |
| H | 0.186411  | 3.979900  | 2.692982  |
| H | -0.478341 | 3.730435  | 1.062464  |
| H | 2.382821  | 3.096617  | 1.956931  |
| H | 1.882387  | 4.552495  | 1.061359  |

|   |           |           |           |
|---|-----------|-----------|-----------|
| H | 3.768048  | 2.352082  | 0.179969  |
| H | 3.363878  | 3.773496  | -0.806297 |
| H | 3.987083  | 1.992940  | -2.326917 |
| H | 2.248341  | 2.285892  | -2.481934 |
| H | 4.292221  | -0.021675 | -0.318460 |
| H | 4.589511  | -0.176267 | -2.069007 |
| H | 4.292117  | -2.380384 | -1.225428 |
| H | 2.817316  | -1.973539 | -2.146890 |
| H | 2.962514  | -4.015805 | 0.074633  |
| H | 1.558728  | -3.552847 | -0.925653 |
| H | 1.765290  | -3.137397 | 2.098579  |
| H | 0.958021  | -4.515385 | 1.305390  |
| H | -0.939869 | -3.901795 | 2.360541  |
| H | -1.932178 | -2.764076 | 1.438101  |
| H | 0.057399  | -1.935103 | 3.616357  |
| H | -1.690685 | -2.148280 | 3.856170  |
| C | -2.513849 | 1.401647  | -2.514802 |
| C | -3.835810 | 1.711684  | -1.788086 |
| C | -4.362228 | 0.683520  | -0.781289 |
| N | -4.413169 | -0.682676 | -1.353691 |
| C | -1.246700 | 1.265430  | -1.650163 |
| C | -1.041568 | -0.072783 | -0.909836 |
| H | -1.823563 | -0.245477 | -0.171068 |
| C | -0.960466 | -1.270703 | -1.879555 |
| O | 0.106885  | -1.655625 | -2.291260 |
| O | -2.109455 | -1.820328 | -2.232005 |
| N | 0.243014  | -0.031181 | -0.142941 |
| H | -2.335127 | 2.232723  | -3.203190 |
| H | -2.628381 | 0.523402  | -3.155275 |
| H | -4.603857 | 1.868395  | -2.554678 |
| H | -3.746242 | 2.669177  | -1.262592 |
| H | -5.349166 | 1.011439  | -0.434858 |
| H | -3.721708 | 0.643567  | 0.104558  |
| H | -2.929797 | -1.373444 | -1.840956 |
| H | -4.997388 | -0.688626 | -2.188317 |
| H | -1.218770 | 2.072380  | -0.910196 |
| H | -0.373942 | 1.409266  | -2.294187 |
| H | 0.231089  | 0.718000  | 0.566818  |
| H | 1.064689  | 0.112461  | -0.760148 |
| H | -4.862020 | -1.319268 | -0.699318 |
| H | 0.375461  | -0.934683 | 0.344682  |

H<sup>+</sup>K[N<sub>e</sub>]-tg.gg.tg(-00/+00/-00/+00/-00/+00) 21bb

|   |          |           |           |
|---|----------|-----------|-----------|
| C | 1.222205 | 3.602454  | -1.210053 |
| C | 1.263104 | 2.696188  | -2.418959 |
| O | 1.965451 | 1.509453  | -2.069271 |
| C | 2.242036 | 0.644610  | -3.160922 |
| C | 3.162308 | -0.455454 | -2.684525 |
| O | 2.499279 | -1.264787 | -1.710888 |
| C | 3.362372 | -2.265461 | -1.167053 |
| C | 2.610701 | -3.088582 | -0.146940 |
| O | 2.222724 | -2.240112 | 0.924270  |

|   |           |           |           |                                                         |           |           |           |
|---|-----------|-----------|-----------|---------------------------------------------------------|-----------|-----------|-----------|
| C | 1.591633  | -2.922933 | 2.000602  | H                                                       | -0.209752 | -2.240571 | -1.384218 |
| C | 1.430504  | -1.974893 | 3.165960  | H                                                       | -1.049473 | -2.127204 | 0.159540  |
| O | 0.528342  | -0.920195 | 2.835365  | H                                                       | 0.577820  | 1.085957  | 0.067575  |
| C | 0.383793  | 0.013015  | 3.912834  | H                                                       | 1.255730  | -0.391661 | -0.328383 |
| C | -0.456976 | 1.189536  | 3.478988  | H                                                       | -5.897509 | 0.144521  | -1.505769 |
| O | 0.258100  | 1.922415  | 2.490270  | H                                                       | 0.275995  | -0.256328 | 1.016518  |
| C | -0.409960 | 3.107960  | 2.077190  |                                                         |           |           |           |
| C | 0.421850  | 3.791713  | 1.018368  |                                                         |           |           |           |
| O | 0.474675  | 2.982740  | -0.163356 | H <sup>+</sup> K[Ne]-cg.ggg.g.(+0+/+00/-00/+00/-00/+00) |           |           |           |
| H | 0.751231  | 4.553848  | -1.490256 | l122bb                                                  |           |           |           |
| H | 2.243852  | 3.807402  | -0.865903 | C                                                       | 4.079449  | 0.185334  | -1.144976 |
| H | 1.779257  | 3.221797  | -3.233921 | C                                                       | 3.707482  | -1.276951 | -1.114801 |
| H | 0.244807  | 2.458698  | -2.757498 | O                                                       | 3.037647  | -1.555245 | 0.112074  |
| H | 2.745168  | 1.193153  | -3.969179 | C                                                       | 2.621870  | -2.908491 | 0.222931  |
| H | 1.312612  | 0.221754  | -3.569502 | C                                                       | 1.931167  | -3.102116 | 1.552818  |
| H | 4.065037  | -0.012974 | -2.245066 | O                                                       | 0.789226  | -2.234944 | 1.645332  |
| H | 3.459584  | -1.073724 | -3.542086 | C                                                       | -0.060458 | -2.518513 | 2.759350  |
| H | 4.229315  | -1.787894 | -0.693365 | C                                                       | -0.667560 | -1.244581 | 3.304899  |
| H | 3.722526  | -2.925539 | -1.967336 | O                                                       | -1.497456 | -0.642961 | 2.312959  |
| H | 3.271867  | -3.888171 | 0.215045  | C                                                       | -2.268195 | 0.460603  | 2.779107  |
| H | 1.729825  | -3.559500 | -0.605244 | C                                                       | -1.488585 | 1.753402  | 2.948471  |
| H | 2.210252  | -3.769530 | 2.328963  | O                                                       | -0.962409 | 2.172314  | 1.689822  |
| H | 0.616251  | -3.319503 | 1.685495  | C                                                       | -0.357368 | 3.467040  | 1.762604  |
| H | 2.408013  | -1.555611 | 3.435945  | C                                                       | 0.216658  | 3.836153  | 0.414921  |
| H | 1.045910  | -2.537076 | 4.027891  | O                                                       | 1.257377  | 2.922282  | 0.107243  |
| H | 1.374826  | 0.362117  | 4.228391  | C                                                       | 1.953766  | 3.213433  | -1.099855 |
| H | -0.099417 | -0.482849 | 4.765038  | C                                                       | 3.217789  | 2.387200  | -1.148528 |
| H | -0.645207 | 1.820402  | 4.359507  | O                                                       | 2.902651  | 0.999526  | -1.206707 |
| H | -1.418760 | 0.853400  | 3.075810  | H                                                       | 4.706454  | 0.377548  | -2.025665 |
| H | -0.524051 | 3.797131  | 2.926382  | H                                                       | 4.653092  | 0.443777  | -0.245888 |
| H | -1.406086 | 2.867456  | 1.688121  | H                                                       | 4.630732  | -1.869631 | -1.185795 |
| H | 1.439630  | 3.963897  | 1.390171  | H                                                       | 3.061803  | -1.528004 | -1.962484 |
| H | -0.031397 | 4.761875  | 0.777431  | H                                                       | 3.488298  | -3.585300 | 0.187021  |
| C | -2.377569 | -2.156204 | -1.559111 | H                                                       | 1.950255  | -3.166668 | -0.603756 |
| C | -3.613319 | -2.201392 | -0.614489 | H                                                       | 2.615865  | -2.876962 | 2.379138  |
| C | -4.934024 | -1.667677 | -1.202230 | H                                                       | 1.611606  | -4.148251 | 1.632532  |
| N | -5.110574 | -0.205595 | -0.965000 | H                                                       | 0.520003  | -2.982708 | 3.565024  |
| C | -1.047572 | -1.761687 | -0.872607 | H                                                       | -0.844879 | -3.219867 | 2.451315  |
| C | -0.752039 | -0.241180 | -0.851085 | H                                                       | 0.133607  | -0.559927 | 3.610102  |
| H | -0.476857 | 0.094192  | -1.849569 | H                                                       | -1.265364 | -1.494118 | 4.192721  |
| C | -2.003292 | 0.509007  | -0.412491 | H                                                       | -2.748768 | 0.212791  | 3.735203  |
| O | -2.761545 | 0.802120  | -1.451666 | H                                                       | -3.055306 | 0.610586  | 2.036813  |
| O | -2.289709 | 0.683764  | 0.753830  | H                                                       | -0.672426 | 1.643029  | 3.674631  |
| N | 0.407809  | 0.064224  | 0.042170  | H                                                       | -2.176963 | 2.515771  | 3.339081  |
| H | -2.564441 | -1.479800 | -2.396084 | H                                                       | 0.440194  | 3.463112  | 2.516117  |
| H | -2.244548 | -3.147231 | -1.999557 | H                                                       | -1.108820 | 4.212294  | 2.054397  |
| H | -3.408647 | -1.661209 | 0.315172  | H                                                       | 0.605767  | 4.862514  | 0.467269  |
| H | -3.776465 | -3.239661 | -0.313076 | H                                                       | -0.565783 | 3.810800  | -0.356840 |
| H | -5.775138 | -2.221599 | -0.773548 | H                                                       | 2.233321  | 4.275126  | -1.132348 |
| H | -4.962746 | -1.831124 | -2.282476 | H                                                       | 1.317008  | 3.003991  | -1.970645 |
| H | -3.762129 | 0.614422  | -1.233317 | H                                                       | 3.822431  | 2.594297  | -0.256104 |
| H | -5.340610 | -0.040966 | 0.012868  | H                                                       | 3.799304  | 2.678624  | -2.034257 |
|   |           |           |           | C                                                       | -2.518083 | 0.622787  | -2.726457 |

|   |           |           |           |
|---|-----------|-----------|-----------|
| C | -3.934950 | 0.657391  | -2.123603 |
| C | -4.293162 | -0.389571 | -1.064489 |
| N | -3.995324 | -1.769815 | -1.514505 |
| C | -1.334194 | 0.832888  | -1.761825 |
| C | -0.885023 | -0.380641 | -0.920265 |
| H | -1.649170 | -0.680684 | -0.205635 |
| C | -0.487863 | -1.577862 | -1.801949 |
| O | 0.660962  | -1.727326 | -2.148530 |
| O | -1.455840 | -2.398068 | -2.158863 |
| N | 0.307299  | 0.001823  | -0.094624 |
| H | -2.472205 | 1.433926  | -3.458888 |
| H | -2.372364 | -0.290914 | -3.308426 |
| H | -4.648000 | 0.570328  | -2.951827 |
| H | -4.116916 | 1.643255  | -1.681208 |
| H | -5.351455 | -0.272041 | -0.804334 |
| H | -3.726606 | -0.218267 | -0.145231 |
| H | -4.327009 | -2.441039 | -0.825620 |
| H | -2.385452 | -2.127366 | -1.846497 |
| H | -1.565563 | 1.649818  | -1.070636 |
| H | -0.467773 | 1.147154  | -2.352784 |
| H | 1.141202  | 0.226841  | -0.663842 |
| H | 0.573096  | -0.775769 | 0.539546  |
| H | -4.507023 | -1.975786 | -2.371049 |
| H | 0.086282  | 0.824002  | 0.485990  |

**Strutture (Arg)H<sup>+</sup>-18C6**H<sup>+</sup>R[N<sub>ω</sub>]-tcg-gg-t(-00/+0+/-00/-00/+0+/-00) 60

|   |           |           |           |
|---|-----------|-----------|-----------|
| C | 3.719425  | 1.218404  | -2.188534 |
| C | 4.636046  | 0.584174  | -1.122807 |
| C | 4.347417  | -0.867668 | -0.682776 |
| H | 5.235612  | -1.202924 | -0.123006 |
| C | 3.202859  | -1.049050 | 0.320141  |
| O | 2.555508  | -2.070823 | 0.390892  |
| O | 3.028954  | 0.000149  | 1.125415  |
| N | 4.060015  | -1.742790 | -1.831807 |
| C | 2.222626  | 1.275831  | -1.874116 |
| N | 1.645874  | -0.069819 | -1.964979 |
| C | 0.385631  | -0.399656 | -1.669706 |
| N | -0.062802 | -1.624141 | -1.997101 |
| N | -0.451844 | 0.471333  | -1.106501 |
| H | 3.854701  | 0.716605  | -3.151925 |
| H | 4.061404  | 2.246240  | -2.338112 |
| H | 4.652408  | 1.206604  | -0.226283 |
| H | 5.655274  | 0.605562  | -1.522644 |
| H | 4.857105  | -1.779072 | -2.460094 |
| H | 3.883321  | -2.687900 | -1.502476 |
| H | 1.720273  | 1.929560  | -2.594545 |
| H | 2.059858  | 1.695085  | -0.878093 |
| H | 2.299384  | -0.820662 | -2.212089 |
| H | -0.856593 | -2.015438 | -1.484286 |
| H | -0.113634 | 1.256456  | -0.556834 |
| H | -1.424556 | 0.213562  | -0.960902 |
| H | 2.224240  | -0.115442 | 1.691716  |
| H | 0.575984  | -2.269656 | -2.432817 |
| C | 0.627121  | 1.644332  | 2.999808  |
| C | 1.141730  | 2.606866  | 1.941071  |
| O | 0.280699  | 2.738818  | 0.807307  |
| C | -0.719536 | 3.750027  | 0.965046  |
| C | -1.650768 | 3.746719  | -0.224844 |
| O | -2.448432 | 2.575625  | -0.182849 |
| C | -3.409711 | 2.505829  | -1.226294 |
| C | -4.288696 | 1.296251  | -1.011433 |
| O | -3.553415 | 0.098461  | -1.257433 |
| C | -4.339728 | -1.066122 | -1.032581 |
| C | -3.566451 | -2.297707 | -1.464883 |
| O | -2.395502 | -2.541663 | -0.682470 |
| C | -2.626661 | -3.239748 | 0.545912  |
| C | -1.357150 | -3.291895 | 1.365474  |
| O | -1.092226 | -2.010611 | 1.910813  |
| C | 0.004093  | -2.011588 | 2.815181  |
| C | 0.134865  | -0.645756 | 3.450620  |
| O | 0.712596  | 0.294667  | 2.532458  |
| H | -0.415113 | 1.870077  | 3.254680  |
| H | 1.232161  | 1.763298  | 3.910000  |
| H | 2.106829  | 2.264916  | 1.564439  |
| H | 1.296392  | 3.587704  | 2.407130  |
| H | -0.235065 | 4.732402  | 1.042098  |

|   |           |           |           |
|---|-----------|-----------|-----------|
| H | -1.303038 | 3.576428  | 1.876761  |
| H | -1.074263 | 3.792910  | -1.160119 |
| H | -2.283589 | 4.644752  | -0.174978 |
| H | -2.913755 | 2.446669  | -2.205131 |
| H | -4.045154 | 3.403082  | -1.218811 |
| H | -5.144160 | 1.351273  | -1.698708 |
| H | -4.670710 | 1.298881  | 0.017719  |
| H | -5.263276 | -1.017281 | -1.627688 |
| H | -4.628141 | -1.124912 | 0.025588  |
| H | -3.222244 | -2.166084 | -2.493162 |
| H | -4.228273 | -3.172130 | -1.435943 |
| H | -2.956927 | -4.262418 | 0.321401  |
| H | -3.407782 | -2.739667 | 1.128397  |
| H | -0.514739 | -3.635867 | 0.749288  |
| H | -1.504188 | -4.026415 | 2.171668  |
| H | 0.929872  | -2.292745 | 2.298098  |
| H | -0.174912 | -2.740479 | 3.619985  |
| H | 0.768849  | -0.717130 | 4.344319  |
| H | -0.856364 | -0.290372 | 3.753352  |

H<sup>+</sup>R[N<sub>ω</sub>]-cggg.tg(+00/-00/+0+/-00/-00/+0+) 1134

|   |           |           |           |
|---|-----------|-----------|-----------|
| C | -3.369596 | 1.206081  | -1.251569 |
| C | -4.895020 | 1.245134  | -1.017193 |
| C | -5.637109 | -0.110421 | -1.096152 |
| H | -5.430885 | -0.555864 | -2.074887 |
| C | -5.112479 | -1.113870 | -0.049860 |
| O | -4.015273 | -1.628001 | -0.120205 |
| O | -5.946086 | -1.358763 | 0.947933  |
| N | -7.078714 | 0.080598  | -0.870156 |
| C | -2.544730 | 1.164104  | 0.047048  |
| N | -1.108546 | 1.009658  | -0.180142 |
| C | -0.487158 | -0.152623 | -0.442702 |
| N | 0.818919  | -0.158679 | -0.686738 |
| N | -1.164264 | -1.306795 | -0.495833 |
| H | -3.110970 | 0.349677  | -1.878582 |
| H | -3.073300 | 2.097778  | -1.810701 |
| H | -5.350925 | 1.881229  | -1.781370 |
| H | -5.121277 | 1.716939  | -0.052688 |
| H | -7.367085 | 1.047150  | -0.969946 |
| H | -7.647486 | -0.481486 | -1.493896 |
| H | -2.897429 | 0.373079  | 0.711675  |
| H | -2.671572 | 2.104010  | 0.588746  |
| H | -0.494141 | 1.797582  | 0.019320  |
| H | 1.368077  | 0.693956  | -0.671636 |
| H | -2.162938 | -1.386056 | -0.325325 |
| H | -0.656910 | -2.139930 | -0.750048 |
| H | -6.768553 | -0.855126 | 0.727544  |
| H | 1.330949  | -1.035020 | -0.631953 |
| C | 3.999150  | 1.417896  | -2.016013 |
| C | 3.738324  | 0.114102  | -2.737593 |
| O | 3.487131  | -0.920323 | -1.796437 |
| C | 3.223408  | -2.177576 | -2.401493 |



|                                                                       |           |           |           |   |           |           |           |
|-----------------------------------------------------------------------|-----------|-----------|-----------|---|-----------|-----------|-----------|
| C                                                                     | 3.024514  | -3.214412 | -1.319219 | N | 0.845064  | 1.236863  | -1.057787 |
| O                                                                     | 1.801674  | -2.959361 | -0.618684 | H | 2.896585  | -0.554048 | 0.469682  |
| C                                                                     | 1.649905  | -3.730427 | 0.581204  | H | 2.875560  | -2.296850 | 0.359769  |
| C                                                                     | 2.266013  | -3.071509 | 1.802151  | H | 4.774560  | -2.288838 | -1.235485 |
| O                                                                     | 1.534368  | -1.896565 | 2.101739  | H | 5.169076  | -1.564931 | 0.315181  |
| C                                                                     | 2.016691  | -1.218525 | 3.252945  | H | 6.942939  | -1.233230 | -1.293587 |
| C                                                                     | 1.187789  | 0.019435  | 3.512676  | H | 6.970009  | 0.053975  | -2.311228 |
| O                                                                     | 1.520488  | 1.031770  | 2.571818  | H | 2.408396  | -0.505252 | -2.084600 |
| C                                                                     | 0.832202  | 2.246636  | 2.793589  | H | 2.172122  | -2.237279 | -1.981521 |
| C                                                                     | 1.347429  | 3.296929  | 1.835439  | H | 0.220404  | -1.874242 | -0.602487 |
| O                                                                     | 0.925882  | 3.002921  | 0.497597  | H | -1.567796 | 1.036247  | -0.330063 |
| C                                                                     | 1.584933  | 3.778464  | -0.508273 | H | 1.855152  | 1.285748  | -0.936475 |
| C                                                                     | 2.947531  | 3.230704  | -0.896643 | H | 0.329401  | 2.103242  | -1.015332 |
| O                                                                     | 2.779768  | 1.955890  | -1.502485 | H | 6.584537  | 1.123222  | -0.149340 |
| H                                                                     | 4.439102  | 2.129317  | -2.728130 | H | -1.750165 | -0.654046 | -0.691166 |
| H                                                                     | 4.716042  | 1.256372  | -1.200661 | C | -4.569867 | -1.204967 | -1.403836 |
| H                                                                     | 4.624304  | -0.133629 | -3.339866 | C | -4.343637 | 0.092364  | -2.148964 |
| H                                                                     | 2.884285  | 0.231154  | -3.418842 | O | -3.920335 | 1.094161  | -1.235898 |
| H                                                                     | 4.070083  | -2.487392 | -3.030949 | C | -3.561556 | 2.318870  | -1.857897 |
| H                                                                     | 2.330419  | -2.117860 | -3.039991 | C | -3.213311 | 3.328053  | -0.786106 |
| H                                                                     | 3.874727  | -3.180558 | -0.628975 | O | -2.009756 | 2.945308  | -0.111365 |
| H                                                                     | 2.983350  | -4.212252 | -1.774671 | C | -1.848975 | 3.619025  | 1.139985  |
| H                                                                     | 2.079540  | -4.729032 | 0.440112  | C | -0.638533 | 3.091279  | 1.876872  |
| H                                                                     | 0.575781  | -3.845280 | 0.742718  | O | -0.843625 | 1.725534  | 2.193405  |
| H                                                                     | 3.325049  | -2.831165 | 1.628752  | C | 0.117173  | 1.205007  | 3.101962  |
| H                                                                     | 2.219300  | -3.782053 | 2.642021  | C | -0.177430 | -0.253346 | 3.377743  |
| H                                                                     | 3.069584  | -0.934579 | 3.119260  | O | 0.293686  | -1.059090 | 2.299578  |
| H                                                                     | 1.948491  | -1.876898 | 4.131615  | C | 0.068406  | -2.450705 | 2.474521  |
| H                                                                     | 1.397162  | 0.373679  | 4.532765  | C | -1.220893 | -2.953233 | 1.843005  |
| H                                                                     | 0.119386  | -0.229957 | 3.450417  | O | -1.084133 | -2.968167 | 0.417117  |
| H                                                                     | 1.003676  | 2.608072  | 3.818976  | C | -2.088989 | -3.710071 | -0.277097 |
| H                                                                     | -0.252662 | 2.110775  | 2.668063  | C | -3.444356 | -3.026573 | -0.356522 |
| H                                                                     | 2.440402  | 3.321734  | 1.893686  | O | -3.314302 | -1.808787 | -1.079054 |
| H                                                                     | 0.960119  | 4.281700  | 2.128221  | H | -5.146538 | -1.889018 | -2.040255 |
| H                                                                     | 1.688900  | 4.818895  | -0.176400 | H | -5.144758 | -1.011486 | -0.489450 |
| H                                                                     | 0.928814  | 3.764222  | -1.381368 | H | -3.591033 | -0.059027 | -2.935213 |
| H                                                                     | 3.612022  | 3.151341  | -0.025828 | H | -5.284977 | 0.392605  | -2.631048 |
| H                                                                     | 3.410402  | 3.930740  | -1.607361 | H | -4.401054 | 2.715208  | -2.447069 |
| H <sup>+</sup> R[N <sub>ω</sub> ]-cgggtg(-00/+00/+0+/-00/-00/+00) 869 |           |           |           |   |           |           |           |
| C                                                                     | 3.093246  | -1.386600 | -0.207465 | H | -2.712259 | 2.168163  | -2.539587 |
| C                                                                     | 4.578122  | -1.420266 | -0.595967 | H | -3.085589 | 4.318681  | -1.241573 |
| C                                                                     | 5.144365  | -0.182487 | -1.335437 | H | -4.036433 | 3.380569  | -0.064007 |
| H                                                                     | 4.679885  | -0.103879 | -2.323228 | H | -2.744616 | 3.463412  | 1.753377  |
| C                                                                     | 4.789296  | 1.118754  | -0.591045 | H | -1.724950 | 4.697274  | 0.971357  |
| O                                                                     | 3.671790  | 1.593623  | -0.591611 | H | 0.274545  | 3.216493  | 1.276709  |
| O                                                                     | 5.793148  | 1.672616  | 0.069106  | H | -0.515781 | 3.689141  | 2.792093  |
| N                                                                     | 6.608279  | -0.285876 | -1.426822 | H | 1.133199  | 1.307537  | 2.697176  |
| C                                                                     | 2.128896  | -1.309866 | -1.403185 | H | 0.069929  | 1.760018  | 4.050187  |
| N                                                                     | 0.737371  | -1.100180 | -1.015631 | H | -1.257931 | -0.379094 | 3.524938  |
| C                                                                     | 0.148869  | 0.100452  | -0.891325 | H | 0.333534  | -0.548684 | 4.304925  |
| N                                                                     | -1.157342 | 0.169645  | -0.667624 | H | 0.912740  | -2.972244 | 2.014726  |
|                                                                       |           |           |           | H | 0.060195  | -2.709368 | 3.541513  |
|                                                                       |           |           |           | H | -1.411704 | -3.975888 | 2.196284  |

H -2.066064 -2.321841 2.140428  
 H -1.701852 -3.855782 -1.287680  
 H -2.213760 -4.696103 0.189201  
 H -4.132954 -3.706537 -0.878127  
 H -3.862904 -2.832773 0.640363

H<sup>+</sup>R[N $\omega$ ]-tg.g.gg(+00/-00/+0+/-00/-00/+0+) 619

C 3.517840 1.685396 0.353557  
 C 4.895645 1.278851 -0.206595  
 C 5.165736 -0.206039 -0.563302  
 H 6.256858 -0.306555 -0.650560  
 C 4.767327 -1.155855 0.557550  
 O 3.959430 -2.051412 0.460959  
 O 5.446525 -0.899252 1.686298  
 N 4.474281 -0.612047 -1.793722  
 C 2.301833 1.595278 -0.585043  
 N 1.883232 0.220420 -0.852158  
 C 0.880835 -0.438996 -0.247856  
 N 0.960418 -1.778119 -0.178066  
 N -0.169513 0.187189 0.267944  
 H 3.300662 1.126346 1.270763  
 H 3.608045 2.733544 0.658962  
 H 5.112570 1.866569 -1.106508  
 H 5.649183 1.568187 0.529548  
 H 4.833658 -0.082672 -2.582419  
 H 4.638089 -1.595248 -1.991577  
 H 2.530730 2.073059 -1.543009  
 H 1.467704 2.148667 -0.156841  
 H 2.608219 -0.340976 -1.310564  
 H 1.872284 -2.213408 -0.190641  
 H -0.408333 1.146736 0.031726  
 H -0.872003 -0.331212 0.787446  
 H 5.181181 -1.547504 2.357438  
 H 0.131484 -2.320182 0.057540  
 C -2.518119 -3.306548 1.162400  
 C -2.079905 -2.574121 2.410620  
 O -2.202649 -1.168685 2.210758  
 C -2.175733 -0.416824 3.424529  
 C -2.675423 0.988026 3.171649  
 O -1.727356 1.699022 2.392481  
 C -2.126404 3.024422 2.085471  
 C -1.043274 3.670670 1.239083  
 O -0.892711 3.069349 -0.050111  
 C -1.789857 3.580476 -1.040150  
 C -1.671816 2.771705 -2.311789  
 O -2.242113 1.492429 -2.105985  
 C -2.262155 0.692769 -3.280352  
 C -3.020665 -0.589198 -3.018392  
 O -2.227497 -1.481461 -2.249395  
 C -2.911267 -2.675275 -1.919410  
 C -1.973235 -3.599366 -1.163024  
 O -1.570545 -3.100725 0.117197

H -3.506717 -2.940758 0.864346  
 H -2.595309 -4.379808 1.384577  
 H -2.730209 -2.892044 3.236585  
 H -1.046639 -2.840410 2.673267  
 H -2.834249 -0.889583 4.165247  
 H -1.158310 -0.389009 3.836257  
 H -3.644200 0.947935 2.654886  
 H -2.823321 1.486295 4.141281  
 H -2.251057 3.614193 3.006476  
 H -3.091452 3.020384 1.559331  
 H -1.248071 4.742979 1.132280  
 H -0.081522 3.556916 1.744356  
 H -1.538545 4.628575 -1.250561  
 H -2.825063 3.535053 -0.683626  
 H -2.204567 3.306681 -3.112480  
 H -0.616469 2.687300 -2.610812  
 H -2.766385 1.236329 -4.092933  
 H -1.239110 0.460573 -3.607367  
 H -3.957205 -0.356062 -2.493147  
 H -3.276172 -1.051920 -3.983394  
 H -3.240601 -3.199334 -2.830599  
 H -3.811434 -2.449812 -1.329128  
 H -2.442212 -4.584672 -1.047882  
 H -1.053277 -3.723588 -1.737534

H<sup>+</sup>R[N $\omega$ ]-ctg.ggg.(-00/+00/--0/-00/+00/--0) 72

C 3.674508 -1.950027 -0.276316  
 C 4.140013 -1.092119 -1.471496  
 C 5.328756 -0.141250 -1.219045  
 H 5.482123 0.433270 -2.139490  
 C 5.036939 0.941198 -0.158170  
 O 3.963534 1.497868 -0.055566  
 O 6.066906 1.247182 0.612928  
 N 6.612666 -0.782259 -0.893909  
 C 2.549120 -1.351874 0.585966  
 N 1.288427 -1.211509 -0.148532  
 C 0.559942 -0.079617 -0.295369  
 N 1.117753 1.125128 -0.185760  
 N -0.726638 -0.202761 -0.599539  
 H 4.510290 -2.185420 0.393922  
 H 3.330505 -2.918562 -0.652999  
 H 3.298573 -0.509454 -1.854875  
 H 4.443257 -1.751612 -2.289318  
 H 7.179309 -0.952654 -1.715989  
 H 6.498699 -1.664035 -0.404653  
 H 2.827552 -0.380082 0.986630  
 H 2.373193 -2.007927 1.444483  
 H 0.763695 -2.060042 -0.314383  
 H 2.126237 1.260765 -0.179943  
 H -1.215720 -1.066314 -0.382581  
 H -1.296064 0.605373 -0.831746  
 H 6.792589 0.637963 0.332625

|                                                                          |           |           |           |   |           |           |           |
|--------------------------------------------------------------------------|-----------|-----------|-----------|---|-----------|-----------|-----------|
| H                                                                        | 0.500038  | 1.934464  | -0.159524 | N | -6.869066 | -0.292724 | -1.360024 |
| C                                                                        | -2.025365 | -0.558013 | 3.431599  | C | -2.389096 | -1.405729 | -0.198926 |
| C                                                                        | -1.264329 | 0.748651  | 3.457882  | N | -0.941652 | -1.241840 | -0.348820 |
| O                                                                        | -1.618422 | 1.535963  | 2.331067  | C | -0.321779 | -0.047774 | -0.467074 |
| C                                                                        | -1.020916 | 2.820385  | 2.337507  | N | -1.022916 | 1.086336  | -0.612108 |
| C                                                                        | -1.539020 | 3.619037  | 1.162694  | N | 1.003093  | -0.012808 | -0.497909 |
| O                                                                        | -1.008813 | 3.096349  | -0.060582 | H | -2.843718 | -0.490676 | -2.110398 |
| C                                                                        | -1.586550 | 3.652381  | -1.243315 | H | -2.797865 | -2.237488 | -2.130322 |
| C                                                                        | -2.899389 | 2.996961  | -1.636453 | H | -4.958240 | -1.978564 | -0.502164 |
| O                                                                        | -2.658775 | 1.633645  | -1.965911 | H | -5.071065 | -2.013703 | -2.249826 |
| C                                                                        | -3.823448 | 0.964576  | -2.449135 | H | -7.387539 | 0.334128  | -1.965769 |
| C                                                                        | -3.484952 | -0.450127 | -2.864223 | H | -7.138207 | -1.242509 | -1.589601 |
| O                                                                        | -3.285461 | -1.259825 | -1.712863 | H | -2.782739 | -0.653712 | 0.488352  |
| C                                                                        | -2.969284 | -2.607973 | -2.023273 | H | -2.540579 | -2.376832 | 0.277565  |
| C                                                                        | -2.823638 | -3.391550 | -0.738433 | H | -0.354541 | -1.967298 | 0.050860  |
| O                                                                        | -1.636761 | -2.980769 | -0.047391 | H | -0.528403 | 1.943684  | -0.388372 |
| C                                                                        | -1.527577 | -3.511810 | 1.279674  | H | 1.564519  | -0.853546 | -0.399396 |
| C                                                                        | -2.192769 | -2.647268 | 2.335176  | H | 1.510877  | 0.864677  | -0.566454 |
| O                                                                        | -1.481819 | -1.426846 | 2.444597  | H | -6.702752 | 0.481425  | 0.343141  |
| H                                                                        | -3.085097 | -0.358723 | 3.222982  | H | -2.030651 | 1.104917  | -0.480870 |
| H                                                                        | -1.953521 | -1.029197 | 4.422796  | C | 0.375533  | -2.126457 | 2.870122  |
| H                                                                        | -0.182953 | 0.552005  | 3.469608  | C | 0.994891  | -0.820252 | 3.344026  |
| H                                                                        | -1.521596 | 1.281858  | 4.385187  | O | 0.409271  | 0.270377  | 2.649911  |
| H                                                                        | 0.075041  | 2.742458  | 2.293430  | C | 0.891696  | 1.532164  | 3.092977  |
| H                                                                        | -1.280257 | 3.361441  | 3.260010  | C | 0.198344  | 2.651915  | 2.331040  |
| H                                                                        | -1.232616 | 4.667652  | 1.271232  | O | 0.660427  | 2.823699  | 0.986049  |
| H                                                                        | -2.633222 | 3.573309  | 1.155582  | C | 1.793727  | 3.678654  | 0.851406  |
| H                                                                        | -0.854032 | 3.501003  | -2.039243 | C | 2.263493  | 3.661170  | -0.585889 |
| H                                                                        | -1.738654 | 4.731944  | -1.121138 | O | 2.804297  | 2.376374  | -0.878808 |
| H                                                                        | -3.305981 | 3.530679  | -2.507598 | C | 3.408238  | 2.276943  | -2.170047 |
| H                                                                        | -3.639395 | 3.064039  | -0.827798 | C | 4.339075  | 1.084635  | -2.200458 |
| H                                                                        | -4.215635 | 1.500760  | -3.324055 | O | 3.589214  | -0.110886 | -2.057835 |
| H                                                                        | -4.601839 | 0.950156  | -1.675267 | C | 4.398906  | -1.270081 | -1.958964 |
| H                                                                        | -2.584214 | -0.447648 | -3.493388 | C | 3.528521  | -2.477194 | -1.686241 |
| H                                                                        | -4.318501 | -0.846667 | -3.461524 | O | 2.918813  | -2.345368 | -0.399434 |
| H                                                                        | -2.039519 | -2.661945 | -2.607801 | C | 2.461683  | -3.573185 | 0.157411  |
| H                                                                        | -3.771648 | -3.064071 | -2.621078 | C | 2.006850  | -3.330583 | 1.579069  |
| H                                                                        | -2.756749 | -4.462096 | -0.971126 | O | 0.809651  | -2.553192 | 1.572686  |
| H                                                                        | -3.707618 | -3.224286 | -0.113182 | H | -0.707672 | -2.002701 | 2.808242  |
| H                                                                        | -0.459339 | -3.582980 | 1.498382  | H | 0.584827  | -2.914342 | 3.603655  |
| H                                                                        | -1.945880 | -4.524619 | 1.312469  | H | 2.084715  | -0.827870 | 3.197775  |
| H                                                                        | -2.176927 | -3.192657 | 3.291695  | H | 0.806360  | -0.724522 | 4.424389  |
| H                                                                        | -3.244956 | -2.456226 | 2.079994  | H | 1.982094  | 1.590152  | 2.964331  |
| H <sup>+</sup> R[N <sub>ω</sub> ]-cg.g.gtg(+00/--0/-00/+00/-00/+0+) 2266 |           |           |           | H | 0.676243  | 1.658892  | 4.164823  |
| C                                                                        | -3.135150 | -1.378623 | -1.543892 | H | 0.318284  | 3.592063  | 2.882704  |
| C                                                                        | -4.671503 | -1.435539 | -1.411418 | H | -0.869424 | 2.433799  | 2.264988  |
| C                                                                        | -5.415123 | -0.078831 | -1.441576 | H | 2.610958  | 3.344211  | 1.501483  |
| H                                                                        | -5.127452 | 0.448206  | -2.357211 | H | 1.523087  | 4.705712  | 1.131389  |
| C                                                                        | -4.994932 | 0.831597  | -0.270490 | H | 3.034924  | 4.432096  | -0.715076 |
| O                                                                        | -3.906377 | 1.363395  | -0.203623 | H | 1.430771  | 3.896169  | -1.263362 |
| O                                                                        | -5.910998 | 0.972305  | 0.675355  | H | 3.996346  | 3.180186  | -2.377638 |
|                                                                          |           |           |           | H | 2.635127  | 2.182809  | -2.943333 |

H 5.073174 1.172013 -1.387556  
H 4.883766 1.086752 -3.156344  
H 5.131187 -1.155174 -1.147673  
H 4.949909 -1.438532 -2.896323  
H 4.162405 -3.372921 -1.708413  
H 2.757528 -2.579701 -2.460499  
H 3.279017 -4.306541 0.172041  
H 1.641481 -3.992666 -0.442302  
H 2.802080 -2.810246 2.125289  
H 1.820335 -4.295717 2.069046

H<sup>+</sup>R[N<sub>ω</sub>]-cgggtg(+00/-00/+00/-00/+0+/-0+) 5345

C -3.259774 -1.553835 -1.245727  
C -4.768392 -1.652555 -0.974517  
C -5.412588 -0.525763 -0.129914  
H -5.027717 -0.576149 0.893436  
C -5.021417 0.867612 -0.661967  
O -3.908291 1.331185 -0.526425  
O -5.989928 1.514531 -1.289761  
N -6.877340 -0.650375 -0.164647  
C -2.386981 -1.533750 0.019509  
N -0.965092 -1.355514 -0.263334  
C -0.334060 -0.168429 -0.397401  
N -1.009781 0.979498 -0.416532  
N 0.986038 -0.171224 -0.550301  
H -2.972024 -2.414218 -1.858490  
H -3.045885 -0.665496 -1.843210  
H -4.991479 -2.597497 -0.465583  
H -5.286582 -1.688660 -1.939054  
H -7.308975 -0.458874 0.732626  
H -7.187448 -1.563731 -0.475564  
H -2.696932 -0.736375 0.696452  
H -2.493442 -2.473542 0.568128  
H -0.391386 -2.173573 -0.408033  
H -0.482881 1.830015 -0.232265  
H 1.534372 -0.983232 -0.280707  
H 1.492590 0.685777 -0.751851  
H -6.787716 0.938760 -1.204448  
H -2.024734 1.025439 -0.408625  
C 1.660591 3.809474 -0.621703  
C 3.003687 3.208288 -1.001211  
O 2.792111 1.937621 -1.605929  
C 3.958914 1.410275 -2.240899  
C 3.650383 0.058962 -2.847087  
O 3.571147 -0.913885 -1.814845  
C 3.158307 -2.193243 -2.266610  
C 3.226083 -3.164144 -1.108541  
O 2.244374 -2.832281 -0.119426  
C 2.544068 -3.397037 1.158916  
C 1.570606 -2.894956 2.201587  
O 1.720478 -1.495318 2.346381  
C 1.052291 -0.968150 3.484759

C 1.214311 0.535878 3.526767  
O 0.325695 1.141635 2.594948  
C 0.326644 2.562733 2.622371  
C 1.346245 3.206702 1.694442  
O 0.925301 3.046674 0.336156  
H 1.026437 3.861679 -1.509146  
H 1.814851 4.830658 -0.250147  
H 3.490644 3.890494 -1.712315  
H 3.666225 3.106683 -0.130968  
H 4.280107 2.095107 -3.036940  
H 4.776649 1.312852 -1.515356  
H 2.704842 0.111261 -3.404221  
H 4.449994 -0.204239 -3.554086  
H 3.823210 -2.558350 -3.062778  
H 2.138422 -2.145684 -2.675221  
H 4.225762 -3.115690 -0.661887  
H 3.056815 -4.185922 -1.472599  
H 3.563277 -3.116481 1.450560  
H 2.485681 -4.492992 1.109357  
H 1.792879 -3.412774 3.146436  
H 0.535469 -3.144827 1.922685  
H 1.483572 -1.398676 4.400232  
H -0.017097 -1.219607 3.459413  
H 2.259629 0.791516 3.309254  
H 0.979325 0.885956 4.542197  
H 0.504838 2.926225 3.643426  
H -0.675161 2.882552 2.324427  
H 2.339528 2.766918 1.844235  
H 1.406949 4.278327 1.928883

H<sup>+</sup>R[N<sub>ω</sub>]-tgtg.g.g.(-00/+00/-0/-00/+00/--0) 255

C 3.194516 -1.964157 -1.260501  
C 3.858088 -0.929433 -0.337693  
C 4.679643 0.163637 -1.066944  
H 5.211683 -0.305293 -1.899530  
C 5.736996 0.721270 -0.110919  
O 5.674197 1.809291 0.405553  
O 6.733901 -0.153892 0.108057  
N 3.838361 1.261092 -1.582605  
C 1.993174 -1.504281 -2.099040  
N 0.807752 -1.185139 -1.301351  
C 0.236830 0.024202 -1.170217  
N -0.986057 0.122802 -0.677112  
N 0.885070 1.135385 -1.564370  
H 2.873888 -2.813443 -0.647147  
H 3.946881 -2.365401 -1.949503  
H 4.532843 -1.473999 0.327289  
H 3.113604 -0.443974 0.302433  
H 4.232618 1.618682 -2.448708  
H 3.908382 2.033495 -0.918047  
H 2.242668 -0.641500 -2.715106  
H 1.721041 -2.310421 -2.787268

|                                                                          |           |           |           |   |           |           |           |
|--------------------------------------------------------------------------|-----------|-----------|-----------|---|-----------|-----------|-----------|
| H                                                                        | 0.276417  | -1.954680 | -0.900603 | C | -5.402476 | 0.076028  | -1.394779 |
| H                                                                        | -1.372814 | 1.034186  | -0.453182 | H | -5.144067 | 0.626713  | -2.305234 |
| H                                                                        | 1.911448  | 1.148380  | -1.637338 | C | -4.951712 | 0.959754  | -0.214787 |
| H                                                                        | 0.403663  | 2.013102  | -1.427307 | O | -3.864254 | 1.497368  | -0.168254 |
| H                                                                        | 7.358082  | 0.243135  | 0.736230  | O | -5.838715 | 1.073049  | 0.760340  |
| H                                                                        | -1.566607 | -0.686280 | -0.487988 | N | -6.852329 | -0.145997 | -1.275232 |
| C                                                                        | -4.758761 | 0.151977  | -1.048129 | C | -2.351670 | -1.289752 | -0.250463 |
| C                                                                        | -4.334330 | -1.232081 | -1.490192 | N | -0.909482 | -1.101696 | -0.410225 |
| O                                                                        | -3.346911 | -1.756816 | -0.600826 | C | -0.303620 | 0.094112  | -0.497341 |
| C                                                                        | -2.988388 | -3.102909 | -0.891781 | N | 1.018803  | 0.149127  | -0.620228 |
| C                                                                        | -2.172995 | -3.659844 | 0.252977  | N | -1.006905 | 1.233876  | -0.511514 |
| O                                                                        | -0.906698 | -2.998791 | 0.326061  | H | -2.791905 | -2.043623 | -2.207971 |
| C                                                                        | -0.191310 | -3.250446 | 1.542879  | H | -2.842199 | -0.298796 | -2.114893 |
| C                                                                        | -0.596581 | -2.345564 | 2.693444  | H | -5.069409 | -1.833198 | -2.266233 |
| O                                                                        | -0.179560 | -1.021718 | 2.415272  | H | -4.919384 | -1.847768 | -0.520949 |
| C                                                                        | -0.507948 | -0.108756 | 3.454044  | H | -7.391413 | 0.491365  | -1.851274 |
| C                                                                        | -0.078234 | 1.290752  | 3.073685  | H | -7.124816 | -1.091955 | -1.516345 |
| O                                                                        | -0.978557 | 1.831709  | 2.116319  | H | -2.484689 | -2.282015 | 0.185580  |
| C                                                                        | -0.659068 | 3.156889  | 1.734062  | H | -2.741794 | -0.576768 | 0.478906  |
| C                                                                        | -1.739337 | 3.682909  | 0.816806  | H | -0.297128 | -1.855691 | -0.105524 |
| O                                                                        | -1.700656 | 2.989482  | -0.436166 | H | 1.505549  | 1.024209  | -0.443554 |
| C                                                                        | -2.813687 | 3.279978  | -1.294322 | H | -2.014072 | 1.277923  | -0.379283 |
| C                                                                        | -4.035406 | 2.422909  | -1.003189 | H | -0.508453 | 2.096393  | -0.665166 |
| O                                                                        | -3.715116 | 1.076890  | -1.313324 | H | -6.638239 | 0.586291  | 0.439956  |
| H                                                                        | -5.005332 | 0.144288  | 0.022509  | H | 1.582851  | -0.693643 | -0.664291 |
| H                                                                        | -5.664209 | 0.429713  | -1.607005 | C | 4.209686  | -1.400545 | -1.882117 |
| H                                                                        | -5.215430 | -1.887885 | -1.484088 | C | 3.862107  | -0.153487 | -2.665084 |
| H                                                                        | -3.941251 | -1.190505 | -2.514416 | O | 3.645710  | 0.922983  | -1.765046 |
| H                                                                        | -3.889827 | -3.720915 | -1.003158 | C | 3.198422  | 2.114172  | -2.393896 |
| H                                                                        | -2.425156 | -3.156874 | -1.834378 | C | 3.105148  | 3.207846  | -1.353028 |
| H                                                                        | -2.729304 | -3.517569 | 1.185556  | O | 2.063020  | 2.916413  | -0.415339 |
| H                                                                        | -2.019227 | -4.736192 | 0.099075  | C | 2.206936  | 3.646377  | 0.805733  |
| H                                                                        | 0.864059  | -3.085307 | 1.316260  | C | 1.151886  | 3.225699  | 1.803715  |
| H                                                                        | -0.315799 | -4.299573 | 1.837296  | O | 1.345351  | 1.864959  | 2.145407  |
| H                                                                        | -1.683244 | -2.378422 | 2.857734  | C | 0.550152  | 1.443216  | 3.245947  |
| H                                                                        | -0.113838 | -2.719378 | 3.610194  | C | 0.841522  | -0.006383 | 3.566627  |
| H                                                                        | 0.007570  | -0.396119 | 4.382321  | O | 0.170394  | -0.855532 | 2.638929  |
| H                                                                        | -1.589426 | -0.118979 | 3.646831  | C | 0.358015  | -2.243083 | 2.878033  |
| H                                                                        | -0.075881 | 1.915968  | 3.978516  | C | 1.494201  | -2.857433 | 2.075183  |
| H                                                                        | 0.944937  | 1.269024  | 2.673216  | O | 1.116132  | -2.936103 | 0.695369  |
| H                                                                        | -0.605784 | 3.813670  | 2.615217  | C | 1.962233  | -3.749656 | -0.119379 |
| H                                                                        | 0.319860  | 3.192390  | 1.232949  | C | 3.285773  | -3.105856 | -0.498177 |
| H                                                                        | -2.713596 | 3.548249  | 1.299259  | O | 3.034654  | -1.937017 | -1.268178 |
| H                                                                        | -1.580489 | 4.755200  | 0.643672  | H | 4.634103  | -2.147365 | -2.566151 |
| H                                                                        | -2.472123 | 3.081914  | -2.312142 | H | 4.961081  | -1.160695 | -1.119150 |
| H                                                                        | -3.076836 | 4.341680  | -1.220603 | H | 4.694442  | 0.081801  | -3.343796 |
| H                                                                        | -4.343234 | 2.511920  | 0.048259  | H | 2.966153  | -0.336298 | -3.274344 |
| H                                                                        | -4.870126 | 2.777190  | -1.626609 | H | 3.908571  | 2.434169  | -3.169987 |
|                                                                          |           |           |           | H | 2.223215  | 1.951247  | -2.874905 |
|                                                                          |           |           |           | H | 2.905794  | 4.168841  | -1.844811 |
|                                                                          |           |           |           | H | 4.063060  | 3.279518  | -0.824963 |
|                                                                          |           |           |           | H | 3.202229  | 3.458330  | 1.226243  |
| H <sup>+</sup> R[N <sub>ω</sub> ]-cg.g.gtg(--0/-00/+00/+00/-00/--0) 4444 |           |           |           |   |           |           |           |
| C                                                                        | -3.120335 | -1.210612 | -1.580684 |   |           |           |           |
| C                                                                        | -4.653674 | -1.278148 | -1.420222 |   |           |           |           |

|   |           |           |           |
|---|-----------|-----------|-----------|
| H | 2.108119  | 4.723113  | 0.612295  |
| H | 1.253479  | 3.868049  | 2.691135  |
| H | 0.141887  | 3.383497  | 1.397499  |
| H | -0.518733 | 1.564571  | 3.023741  |
| H | 0.787572  | 2.052990  | 4.129871  |
| H | 0.483519  | -0.220091 | 4.583502  |
| H | 1.926894  | -0.169661 | 3.542146  |
| H | 0.540214  | -2.431228 | 3.944125  |
| H | -0.576658 | -2.743956 | 2.609542  |
| H | 1.687044  | -3.870827 | 2.453051  |
| H | 2.410157  | -2.266289 | 2.189543  |
| H | 2.159627  | -4.704842 | 0.384209  |
| H | 1.390299  | -3.952814 | -1.027143 |
| H | 3.885755  | -2.855495 | 0.387232  |
| H | 3.856832  | -3.835629 | -1.089735 |

H<sup>+</sup>R[N<sub>ω</sub>]-cggg.tg.(+00/-00/+00/-00/+0+/-0+) 11955

|   |           |           |           |
|---|-----------|-----------|-----------|
| C | 3.120233  | -1.210549 | -1.580960 |
| C | 4.653580  | -1.278098 | -1.420581 |
| C | 5.402394  | 0.076072  | -1.395154 |
| H | 5.143954  | 0.626767  | -2.305595 |
| C | 4.951682  | 0.959795  | -0.215139 |
| O | 3.864226  | 1.497408  | -0.168558 |
| O | 5.838728  | 1.073090  | 0.759948  |
| N | 6.852250  | -0.145962 | -1.275666 |
| C | 2.351642  | -1.289711 | -0.250698 |
| N | 0.909444  | -1.101658 | -0.410376 |
| C | 0.303571  | 0.094151  | -0.497401 |
| N | 1.006851  | 1.233919  | -0.511582 |
| N | -1.018861 | 0.149167  | -0.620188 |
| H | 2.791764  | -2.043545 | -2.208245 |
| H | 2.842074  | -0.298721 | -2.115135 |
| H | 4.919333  | -1.847735 | -0.521331 |
| H | 5.069267  | -1.833136 | -2.266623 |
| H | 7.391315  | 0.491383  | -1.851744 |
| H | 7.124723  | -1.091927 | -1.516766 |
| H | 2.484690  | -2.281980 | 0.185323  |
| H | 2.741802  | -0.576736 | 0.478660  |
| H | 0.297114  | -1.855667 | -0.105661 |
| H | 0.508384  | 2.096440  | -0.665163 |
| H | -1.582913 | -0.693602 | -0.664223 |
| H | -1.505595 | 1.024239  | -0.443435 |
| H | 6.638239  | 0.586334  | 0.439527  |
| H | 2.014030  | 1.277963  | -0.379444 |
| C | -4.209858 | -1.400440 | -1.881848 |
| C | -3.862355 | -0.153333 | -2.664771 |
| O | -3.645891 | 0.923087  | -1.764690 |
| C | -3.198675 | 2.114319  | -2.393511 |
| C | -3.105292 | 3.207927  | -1.352582 |
| O | -2.063062 | 2.916434  | -0.415025 |
| C | -2.206845 | 3.646323  | 0.806108  |
| C | -1.151696 | 3.225579  | 1.803958  |

|   |           |           |           |
|---|-----------|-----------|-----------|
| O | -1.345132 | 1.864819  | 2.145587  |
| C | -0.549858 | 1.443019  | 3.246051  |
| C | -0.841210 | -0.006596 | 3.566676  |
| O | -0.170148 | -0.855701 | 2.638890  |
| C | -0.357774 | -2.243262 | 2.877927  |
| C | -1.494033 | -2.857547 | 2.075129  |
| O | -1.116074 | -2.936134 | 0.695281  |
| C | -1.962236 | -3.749645 | -0.119447 |
| C | -3.285813 | -3.105834 | -0.498099 |
| O | -3.034770 | -1.936942 | -1.268044 |
| H | -4.634330 | -2.147221 | -2.565891 |
| H | -4.961188 | -1.160641 | -1.118801 |
| H | -4.694748 | 0.081987  | -3.343400 |
| H | -2.966449 | -0.336102 | -3.274115 |
| H | -3.908910 | 2.434363  | -3.169505 |
| H | -2.223520 | 1.951429  | -2.874635 |
| H | -4.063146 | 3.279562  | -0.824408 |
| H | -2.905993 | 4.168954  | -1.844324 |
| H | -3.202096 | 3.458256  | 1.226708  |
| H | -2.108043 | 4.723070  | 0.612725  |
| H | -1.253200 | 3.867876  | 2.691426  |
| H | -0.141736 | 3.383400  | 1.397652  |
| H | -0.787218 | 2.052748  | 4.130022  |
| H | 0.519012  | 1.564384  | 3.023781  |
| H | -1.926585 | -0.169869 | 3.542259  |
| H | -0.483141 | -0.220357 | 4.583516  |
| H | -0.539892 | -2.431467 | 3.944022  |
| H | 0.576870  | -2.744134 | 2.609333  |
| H | -2.409972 | -2.266399 | 2.189598  |
| H | -1.686858 | -3.870961 | 2.452950  |
| H | -2.159581 | -4.704862 | 0.384099  |
| H | -1.390375 | -3.952743 | -1.027271 |
| H | -3.885730 | -2.855539 | 0.387373  |
| H | -3.856909 | -3.835575 | -1.089659 |

H<sup>+</sup>R[N<sub>ω</sub>]-cg.g.tg(-00/+0+/-0+/-00/+00) 9813

|   |           |           |           |
|---|-----------|-----------|-----------|
| C | -3.207323 | 1.327581  | -0.093497 |
| C | -4.702512 | 1.296509  | -0.477989 |
| C | -5.456005 | -0.019147 | -0.166458 |
| H | -5.408373 | -0.194540 | 0.913063  |
| C | -4.771156 | -1.228006 | -0.829348 |
| O | -3.716347 | -1.680948 | -0.434640 |
| O | -5.407756 | -1.718334 | -1.881377 |
| N | -6.839183 | 0.059180  | -0.660696 |
| C | -2.269038 | 1.057059  | -1.284078 |
| N | -0.864381 | 0.924522  | -0.910476 |
| C | -0.211957 | -0.231321 | -0.708076 |
| N | 1.106782  | -0.216925 | -0.559255 |
| N | -0.853556 | -1.409293 | -0.705944 |
| H | -3.003513 | 0.608062  | 0.701630  |
| H | -2.967118 | 2.314200  | 0.312558  |
| H | -4.825609 | 1.525454  | -1.544040 |

|   |           |           |           |                                                                      |           |           |           |
|---|-----------|-----------|-----------|----------------------------------------------------------------------|-----------|-----------|-----------|
| H | -5.231789 | 2.084361  | 0.065673  | H                                                                    | 1.398339  | 4.239254  | 1.750490  |
| H | -7.502424 | -0.378522 | -0.030347 | H <sup>+</sup> R[N <sub>ω</sub> ]-cgggtg(-00/+0/+00/-00/+00/--0) 581 |           |           |           |
| H | -7.143257 | 1.012663  | -0.821434 | C                                                                    | -3.257243 | 1.222917  | -0.048353 |
| H | -2.340596 | 1.882025  | -1.999200 | C                                                                    | -4.743094 | 1.228650  | -0.436826 |
| H | -2.563708 | 0.157111  | -1.824156 | C                                                                    | -5.267812 | 0.019886  | -1.250611 |
| H | -0.348565 | 1.757312  | -0.633928 | H                                                                    | -4.796675 | 0.013340  | -2.238309 |
| H | 1.583655  | -1.029414 | -0.178789 | C                                                                    | -4.874938 | -1.311421 | -0.581422 |
| H | -1.860146 | -1.496100 | -0.596035 | O                                                                    | -3.739833 | -1.741281 | -0.591151 |
| H | -0.293982 | -2.246694 | -0.648900 | O                                                                    | -5.867470 | -1.943993 | 0.022738  |
| H | -6.250031 | -1.203317 | -1.937809 | N                                                                    | -6.733657 | 0.083046  | -1.347849 |
| H | 1.656381  | 0.620087  | -0.724383 | C                                                                    | -2.290983 | 1.241857  | -1.245262 |
| C | 1.916319  | 3.696782  | -0.723208 | N                                                                    | -0.889022 | 1.073841  | -0.874389 |
| C | 3.284458  | 3.046221  | -0.849876 | C                                                                    | -0.253187 | -0.110003 | -0.783952 |
| O | 3.133146  | 1.749060  | -1.411896 | N                                                                    | -0.914492 | -1.265840 | -0.963400 |
| C | 4.372129  | 1.146095  | -1.796154 | N                                                                    | 1.051782  | -0.137762 | -0.579055 |
| C | 4.119717  | -0.223225 | -2.388803 | H                                                                    | -3.034088 | 0.361801  | 0.583504  |
| O | 3.821983  | -1.143836 | -1.349249 | H                                                                    | -3.072478 | 2.109755  | 0.565754  |
| C | 3.427803  | -2.424219 | -1.818881 | H                                                                    | -4.968446 | 2.127484  | -1.022740 |
| C | 3.219901  | -3.339691 | -0.632509 | H                                                                    | -5.338331 | 1.297838  | 0.480350  |
| O | 2.088321  | -2.914413 | 0.135417  | H                                                                    | -7.078387 | -0.202122 | -2.257883 |
| C | 2.087942  | -3.461220 | 1.456970  | H                                                                    | -7.101087 | 1.005980  | -1.147032 |
| C | 0.953875  | -2.879836 | 2.271336  | H                                                                    | -2.540121 | 0.457886  | -1.962002 |
| O | 1.152674  | -1.484871 | 2.418038  | H                                                                    | -2.375641 | 2.191354  | -1.781425 |
| C | 0.276141  | -0.883529 | 3.360564  | H                                                                    | -0.375876 | 1.867170  | -0.501505 |
| C | 0.535319  | 0.606371  | 3.426893  | H                                                                    | -1.923864 | -1.346704 | -0.858334 |
| O | -0.095963 | 1.260983  | 2.328827  | H                                                                    | 1.624785  | 0.698826  | -0.569703 |
| C | 0.055089  | 2.673213  | 2.328760  | H                                                                    | 1.516123  | -1.020310 | -0.386377 |
| C | 1.253247  | 3.171598  | 1.535154  | H                                                                    | -6.675284 | -1.410203 | -0.172519 |
| O | 1.005420  | 3.005726  | 0.134202  | H                                                                    | -0.376227 | -2.118241 | -0.908776 |
| H | 2.042630  | 4.731284  | -0.378233 | C                                                                    | 1.326131  | -3.039723 | 2.016405  |
| H | 1.438242  | 3.719169  | -1.704663 | C                                                                    | 2.384392  | -3.423015 | 1.006704  |
| H | 3.897426  | 3.677710  | -1.508683 | O                                                                    | 2.041216  | -2.902857 | -0.282629 |
| H | 3.797754  | 2.982633  | 0.119217  | C                                                                    | 3.002475  | -3.193192 | -1.306571 |
| H | 5.037244  | 1.058596  | -0.927765 | C                                                                    | 4.164915  | -2.213364 | -1.347556 |
| H | 4.862980  | 1.776932  | -2.548899 | O                                                                    | 3.655489  | -0.935569 | -1.691579 |
| H | 5.019342  | -0.544897 | -2.932777 | C                                                                    | 4.637094  | 0.086121  | -1.769981 |
| H | 3.289437  | -0.166973 | -3.106221 | C                                                                    | 3.972937  | 1.391776  | -2.152822 |
| H | 4.208498  | -2.860099 | -2.458886 | O                                                                    | 3.197695  | 1.881675  | -1.057252 |
| H | 2.507736  | -2.346161 | -2.415764 | C                                                                    | 2.632686  | 3.169022  | -1.279348 |
| H | 3.065503  | -4.367924 | -0.984525 | C                                                                    | 2.161679  | 3.728830  | 0.044644  |
| H | 4.117298  | -3.318884 | -0.003263 | O                                                                    | 1.075950  | 2.955364  | 0.563307  |
| H | 1.974878  | -4.552840 | 1.411574  | C                                                                    | 0.919643  | 3.127549  | 1.974829  |
| H | 3.042569  | -3.230375 | 1.944991  | C                                                                    | -0.278992 | 2.342987  | 2.483563  |
| H | 0.953669  | -3.379308 | 3.251581  | O                                                                    | -0.171057 | 0.935225  | 2.360097  |
| H | -0.016597 | -3.083835 | 1.795662  | C                                                                    | 0.569644  | 0.303742  | 3.400803  |
| H | 0.448489  | -1.317592 | 4.356284  | C                                                                    | 0.487077  | -1.200573 | 3.253392  |
| H | -0.772668 | -1.062264 | 3.086744  | O                                                                    | 1.360318  | -1.637972 | 2.221080  |
| H | 0.123935  | 0.994851  | 4.369302  | H                                                                    | 1.537985  | -3.574187 | 2.954543  |
| H | 1.618776  | 0.782615  | 3.426717  | H                                                                    | 0.332580  | -3.356492 | 1.667372  |
| H | -0.855995 | 3.090386  | 1.890704  | H                                                                    | 3.354567  | -3.031630 | 1.333469  |
| H | 0.134020  | 3.052818  | 3.356218  | H                                                                    | 2.448996  | -4.517444 | 0.951383  |
| H | 2.162427  | 2.635484  | 1.831515  |                                                                      |           |           |           |

H 3.383168 -4.214092 -1.183094  
H 2.459288 -3.141997 -2.252132  
H 4.688630 -2.170773 -0.382002  
H 4.886272 -2.561022 -2.102353  
H 5.385877 -0.161533 -2.536370  
H 5.155316 0.199524 -0.807791  
H 4.751600 2.123501 -2.406131  
H 3.337055 1.242017 -3.035010  
H 1.806423 3.108441 -2.002141  
H 3.388030 3.851980 -1.690955  
H 2.998633 3.705729 0.752251  
H 1.848667 4.773156 -0.087358  
H 1.841139 2.813728 2.481151  
H 0.756167 4.190090 2.205107  
H -0.451666 2.628207 3.531439  
H -1.166419 2.631868 1.914949  
H 0.144948 0.584038 4.375485  
H 1.623284 0.609479 3.383277  
H 0.778772 -1.663618 4.207580  
H -0.549005 -1.492843 3.034482

H<sup>+</sup>R[N<sub>ω</sub>]-tcg.g.gg(--0/-00/-00/+00/-00/+00) 4321

C -2.291453 -2.395486 -0.384536  
C -3.769247 -2.039835 -0.640173  
C -4.139057 -0.632142 -1.172400  
H -5.195870 -0.471119 -0.909564  
C -3.391387 0.519847 -0.503872  
O -2.994749 1.490946 -1.113733  
O -3.234849 0.352748 0.807834  
N -3.923489 -0.522630 -2.626021  
C -1.332323 -2.369459 -1.581883  
N -1.128727 -1.032410 -2.137832  
C -0.218855 -0.139210 -1.730307  
N -0.217899 1.089337 -2.298274  
N 0.723218 -0.414885 -0.836632  
H -2.275985 -3.414146 0.018274  
H -1.893109 -1.748076 0.399941  
H -4.298834 -2.177434 0.305393  
H -4.205583 -2.766597 -1.335488  
H -4.535892 -1.165369 -3.118985  
H -4.152754 0.416844 -2.939083  
H -1.713310 -2.994646 -2.393682  
H -0.367574 -2.790594 -1.292539  
H -1.951333 -0.681452 -2.641698  
H 0.177984 1.834711 -1.726140  
H 1.435688 0.285051 -0.640402  
H 0.780296 -1.269753 -0.294406  
H -2.596537 1.020248 1.166794  
H -1.059384 1.353656 -2.789142  
C 4.094581 1.183573 -1.445538  
C 3.972496 -0.279671 -1.811888  
O 3.713071 -1.024147 -0.634347

C 3.468255 -2.402016 -0.858040  
C 3.082247 -3.042663 0.456949  
O 1.787747 -2.596876 0.876912  
C 1.584099 -2.798561 2.275503  
C 0.218427 -2.319885 2.712893  
O 0.140215 -0.904769 2.621513  
C -1.001975 -0.367056 3.270603  
C -0.924229 1.144560 3.285342  
O -1.147419 1.694424 1.978036  
C -0.866488 3.096589 1.907530  
C -0.671540 3.545432 0.466781  
O 0.472040 3.001513 -0.195959  
C 1.736398 3.367953 0.352611  
C 2.836770 3.041560 -0.633920  
O 2.864062 1.639324 -0.880125  
H 4.332888 1.756748 -2.351489  
H 4.904427 1.325569 -0.719029  
H 4.911079 -0.604187 -2.284236  
H 3.160470 -0.419099 -2.539275  
H 4.370410 -2.901015 -1.240932  
H 2.670332 -2.535948 -1.602651  
H 3.828316 -2.770908 1.212680  
H 3.080532 -4.135466 0.349341  
H 2.356500 -2.260351 2.838789  
H 1.666499 -3.868600 2.513047  
H 0.074127 -2.641261 3.754911  
H -0.567633 -2.792371 2.107762  
H -1.034621 -0.704725 4.317296  
H -1.926392 -0.704922 2.784093  
H 0.068438 1.447691 3.636145  
H -1.675373 1.534896 3.984875  
H 0.022851 3.313621 2.509385  
H -1.699827 3.670703 2.335726  
H -0.609857 4.642697 0.465176  
H -1.528349 3.245242 -0.137610  
H 1.917930 2.827953 1.288898  
H 1.760615 4.447067 0.558072  
H 3.789823 3.368536 -0.197413  
H 2.686046 3.584434 -1.576478

H<sup>+</sup>R[N<sub>ω</sub>]-tg.g.g.g(-00/+00/--0/-00/+00/--0) 1154

C -3.512510 1.345572 -0.659613  
C -3.791415 0.288461 0.421930  
C -4.591654 -0.965301 -0.010346  
H -4.748052 -1.561507 0.892221  
C -5.972302 -0.561500 -0.530218  
O -6.311277 -0.637423 -1.684993  
O -6.759364 -0.080687 0.449125  
N -3.881934 -1.792731 -1.003898  
C -2.384142 1.037656 -1.659400  
N -1.063879 0.899603 -1.042723  
C -0.360282 -0.238143 -0.908078



|   |           |           |           |                                                                     |           |           |           |
|---|-----------|-----------|-----------|---------------------------------------------------------------------|-----------|-----------|-----------|
| N | 0.927345  | -0.176956 | -0.610875 | H                                                                   | 3.273847  | 3.932077  | -1.624050 |
| N | -0.938645 | -1.437037 | -1.099252 | H                                                                   | 1.769448  | 3.169283  | -2.180412 |
| H | -4.419192 | 1.553955  | -1.238795 | H                                                                   | 4.693016  | 2.222161  | -2.248906 |
| H | -3.263998 | 2.285313  | -0.155140 | H                                                                   | 3.360557  | 1.315045  | -3.006044 |
| H | -4.353965 | 0.762400  | 1.230346  | H                                                                   | 4.994189  | 0.300753  | -0.626825 |
| H | -2.849545 | -0.051500 | 0.862279  | H                                                                   | 5.384053  | -0.040595 | -2.330388 |
| H | -4.118046 | -2.770600 | -0.858604 |                                                                     |           |           |           |
| H | -4.250518 | -1.571715 | -1.929187 | H <sup>+</sup> R[N <sub>ω</sub> ]-tcgg.gt(--0/-00/+0+/-00/--0) 2236 |           |           |           |
| H | -2.324760 | 1.859550  | -2.378593 | C                                                                   | -3.826005 | 0.811396  | -2.433281 |
| H | -2.590050 | 0.138764  | -2.238197 | C                                                                   | -4.797791 | 0.394213  | -1.311366 |
| H | -0.565524 | 1.744704  | -0.772936 | C                                                                   | -4.517506 | -0.922015 | -0.558211 |
| H | 1.442064  | -1.023163 | -0.388144 | H                                                                   | -5.430128 | -1.153534 | 0.014039  |
| H | -1.959613 | -1.567340 | -1.061698 | C                                                                   | -3.423797 | -0.863458 | 0.514129  |
| H | -0.346985 | -2.249674 | -1.001169 | O                                                                   | -2.822046 | -1.849869 | 0.876624  |
| H | -7.610078 | 0.175802  | 0.058684  | O                                                                   | -3.232265 | 0.353724  | 1.025886  |
| H | 1.440247  | 0.697189  | -0.585555 | N                                                                   | -4.156374 | -2.018188 | -1.476083 |
| C | 4.136100  | -2.141040 | -1.324158 | C                                                                   | -2.347791 | 0.946241  | -2.057803 |
| C | 2.995560  | -3.146495 | -1.342440 | N                                                                   | -1.751491 | -0.383659 | -1.883789 |
| O | 2.017127  | -2.914890 | -0.318612 | C                                                                   | -0.466473 | -0.611679 | -1.605781 |
| C | 2.355832  | -3.490481 | 0.948316  | N                                                                   | 0.354221  | 0.379121  | -1.255821 |
| C | 1.375284  | -3.030943 | 2.003261  | N                                                                   | 0.031059  | -1.854222 | -1.739549 |
| O | 1.569112  | -1.650066 | 2.247787  | H                                                                   | -4.158875 | 1.785021  | -2.803398 |
| C | 0.755408  | -1.144888 | 3.297150  | H                                                                   | -3.907844 | 0.125366  | -3.282329 |
| C | 1.055381  | 0.320135  | 3.525166  | H                                                                   | -4.872341 | 1.191463  | -0.569524 |
| O | 0.473783  | 1.105788  | 2.493633  | H                                                                   | -5.791784 | 0.307831  | -1.762906 |
| C | 0.761622  | 2.485787  | 2.624540  | H                                                                   | -4.920985 | -2.215160 | -2.114945 |
| C | 0.084584  | 3.248742  | 1.499031  | H                                                                   | -3.980019 | -2.861264 | -0.936005 |
| O | 0.637542  | 2.985524  | 0.202672  | H                                                                   | -2.247006 | 1.532920  | -1.140362 |
| C | 1.792097  | 3.771318  | -0.104459 | H                                                                   | -1.810005 | 1.471333  | -2.853304 |
| C | 2.475908  | 3.232180  | -1.340462 | H                                                                   | -2.395040 | -1.180224 | -1.959694 |
| O | 3.024409  | 1.950867  | -1.052374 | H                                                                   | 1.353552  | 0.199441  | -1.193606 |
| C | 3.908713  | 1.474747  | -2.068380 | H                                                                   | 0.866008  | -2.119345 | -1.215029 |
| C | 4.564955  | 0.182728  | -1.631345 | H                                                                   | -0.580097 | -2.591186 | -2.052361 |
| O | 3.607659  | -0.865130 | -1.644975 | H                                                                   | -2.446102 | 0.341256  | 1.633617  |
| H | 4.886461  | -2.448923 | -2.067896 | H                                                                   | 0.015358  | 1.212661  | -0.786431 |
| H | 4.630683  | -2.116478 | -0.342809 | C                                                                   | 3.755878  | -1.518454 | -1.970872 |
| H | 3.394969  | -4.163853 | -1.255578 | C                                                                   | 3.778412  | -2.308469 | -0.674464 |
| H | 2.464120  | -3.067194 | -2.292726 | O                                                                   | 2.437135  | -2.591402 | -0.276248 |
| H | 3.366843  | -3.192607 | 1.247101  | C                                                                   | 2.321188  | -3.277972 | 0.975495  |
| H | 2.322477  | -4.585034 | 0.871150  | C                                                                   | 2.269906  | -2.352790 | 2.178266  |
| H | 1.552727  | -3.616340 | 2.917908  | O                                                                   | 1.022488  | -1.681909 | 2.186395  |
| H | 0.343131  | -3.227476 | 1.676222  | C                                                                   | 0.812029  | -0.896996 | 3.346256  |
| H | 0.961269  | -1.694566 | 4.227299  | C                                                                   | -0.631933 | -0.429958 | 3.387062  |
| H | -0.309139 | -1.272031 | 3.054886  | O                                                                   | -0.952749 | 0.588961  | 2.425838  |
| H | 2.143292  | 0.469807  | 3.555802  | C                                                                   | -0.605012 | 1.920881  | 2.814062  |
| H | 0.642222  | 0.616937  | 4.500589  | C                                                                   | -0.942268 | 2.885494  | 1.686315  |
| H | 1.848412  | 2.652567  | 2.617007  | O                                                                   | -0.049815 | 2.818816  | 0.572675  |
| H | 0.376346  | 2.872858  | 3.581057  | C                                                                   | 1.096420  | 3.661178  | 0.716129  |
| H | 0.123282  | 4.324708  | 1.708324  | C                                                                   | 1.989790  | 3.552270  | -0.497229 |
| H | -0.964924 | 2.951233  | 1.448888  | O                                                                   | 2.632679  | 2.286492  | -0.506137 |
| H | 2.500060  | 3.748935  | 0.730910  | C                                                                   | 3.595018  | 2.158929  | -1.544087 |
| H | 1.493695  | 4.813318  | -0.280866 | C                                                                   | 4.222582  | 0.785969  | -1.474962 |

O 3.245981 -0.193904 -1.826322  
H 3.107064 -2.020728 -2.692031  
H 4.768335 -1.489318 -2.391908  
H 4.303943 -1.750675 0.110338  
H 4.319925 -3.250135 -0.840652  
H 3.151964 -3.984979 1.086567  
H 1.391305 -3.848245 0.928691  
H 3.100403 -1.631582 2.160468  
H 2.380679 -2.963204 3.087717  
H 1.512611 -0.049413 3.373173  
H 0.991197 -1.499561 4.250023  
H -0.871293 -0.067982 4.394636  
H -1.282515 -1.272944 3.148288  
H 0.460486 1.976009 3.061534  
H -1.177240 2.202822 3.709044  
H -0.958826 3.905913 2.088787  
H -1.940128 2.666539 1.301352  
H 1.669772 3.387944 1.610313  
H 0.768883 4.704377 0.819857  
H 2.736820 4.357508 -0.445836  
H 1.403002 3.694084 -1.415812  
H 4.383871 2.915929 -1.427801  
H 3.122886 2.301971 -2.525639  
H 4.613529 0.607784 -0.465399  
H 5.059576 0.743984 -2.184407

H<sup>+</sup>R[N<sub>ω</sub>]-tcg.g.gg(--0/-00/+00/--+/-+00/--0) 9472

C -2.374492 -2.394716 0.031598  
C -3.886955 -2.098639 0.018392  
C -4.396666 -0.744530 -0.536077  
H -5.404653 -0.599145 -0.118364  
C -3.596096 0.464501 -0.060597  
O -3.286412 1.385969 -0.788976  
O -3.284619 0.406898 1.230656  
N -4.415201 -0.725532 -2.009254  
C -1.647956 -2.441993 -1.320104  
N -1.561873 -1.138905 -1.982289  
C -0.613827 -0.218348 -1.780304  
N -0.756461 0.998796 -2.363604  
N 0.486170 -0.458576 -1.078905  
H -1.862376 -1.687181 0.689120  
H -2.250591 -3.379716 0.494962  
H -4.409734 -2.886260 -0.537390  
H -4.238179 -2.176382 1.049793  
H -5.064310 -1.424006 -2.358416  
H -4.735672 0.180003 -2.341207  
H -2.163288 -3.112554 -2.012742  
H -0.644269 -2.844954 -1.180303  
H -2.466629 -0.820205 -2.347370  
H -1.697793 1.234150 -2.645838  
H 1.212160 0.248101 -1.007034  
H 0.662379 -1.327273 -0.581364

H -2.611334 1.101459 1.440091  
H -0.288971 1.762725 -1.876293  
C 1.601438 3.591129 -0.450589  
C 2.550743 2.928168 -1.423610  
O 2.869693 1.615520 -0.970153  
C 3.948924 1.020699 -1.694101  
C 4.446598 -0.202672 -0.957375  
O 3.424098 -1.184968 -0.940229  
C 3.791836 -2.393084 -0.299039  
C 2.592517 -3.326633 -0.309316  
O 1.446994 -2.821475 0.384094  
C 1.477690 -2.921678 1.813541  
C 1.704069 -1.597438 2.523317  
O 0.529391 -0.802707 2.446935  
C 0.637399 0.401269 3.190479  
C -0.701091 1.117201 3.210928  
O -1.045873 1.739191 1.963045  
C -0.562747 3.078986 1.815123  
C -0.663523 3.515570 0.362129  
O 0.332291 2.941391 -0.491264  
H 2.029061 3.546401 0.557943  
H 1.487139 4.646864 -0.732192  
H 2.109113 2.892792 -2.429052  
H 3.463144 3.537336 -1.478102  
H 4.777625 1.735744 -1.781079  
H 3.621492 0.747630 -2.705557  
H 4.735239 0.068179 0.068136  
H 5.339347 -0.582691 -1.475033  
H 4.136153 -2.196018 0.726684  
H 4.618510 -2.883592 -0.834939  
H 2.268065 -3.479868 -1.340580  
H 2.883190 -4.299695 0.104750  
H 0.514267 -3.330990 2.128994  
H 2.259386 -3.626286 2.117661  
H 2.556170 -1.060976 2.084991  
H 1.942130 -1.811045 3.576948  
H 1.423419 1.044414 2.768736  
H 0.916578 0.175223 4.231035  
H -1.488702 0.391223 3.422263  
H -0.704233 1.866540 4.010995  
H -1.168148 3.755018 2.434147  
H 0.473122 3.141380 2.165289  
H -0.601272 4.610254 0.315866  
H -1.627650 3.207629 -0.046417

H<sup>+</sup>R[N<sub>ω</sub>]-cg.g.gtg(-00/+00/-00/+00/--0/-00) 11396

C -3.289256 1.147440 -0.000411  
C -4.785001 1.084580 -0.379924  
C -5.515816 -0.237266 -0.043053  
H -5.448377 -0.400755 1.037314  
C -4.827001 -1.445559 -0.704184  
O -3.753822 -1.873321 -0.331148

O -5.483455 -1.966561 -1.728051  
 N -6.908708 -0.183188 -0.512659  
 C -2.347056 0.871100 -1.186664  
 N -0.938791 0.773478 -0.813701  
 C -0.261736 -0.364929 -0.588635  
 N 1.058950 -0.321249 -0.496769  
 N -0.896023 -1.544257 -0.491225  
 H -3.073842 0.444861 0.807284  
 H -3.066143 2.145132 0.388042  
 H -5.324740 1.872869 0.152635  
 H -4.914611 1.294534 -1.449047  
 H -7.224901 0.762965 -0.692051  
 H -7.556077 -0.610889 0.140554  
 H -2.434047 1.680022 -1.917769  
 H -2.628222 -0.045154 -1.706326  
 H -0.410593 1.627718 -0.645906  
 H 1.568202 0.527106 -0.730517  
 H -0.344877 -2.387104 -0.489550  
 H -1.904893 -1.635079 -0.407634  
 H -6.334872 -1.465109 -1.772169  
 H 1.596891 -1.105269 -0.133624  
 C 3.544794 -2.153614 -2.083158  
 C 3.771669 -2.890597 -0.781403  
 O 2.659816 -2.697062 0.098365  
 C 2.895992 -3.208339 1.411233  
 C 1.738070 -2.856617 2.318582  
 O 1.709253 -1.453010 2.506136  
 C 0.694737 -1.016433 3.399067  
 C 0.852005 0.464872 3.664038  
 O 0.410392 1.221895 2.543123  
 C 0.677511 2.604378 2.684001  
 C 0.126227 3.368834 1.490437  
 O 0.706870 3.041075 0.224507  
 C 2.052778 3.491076 0.065275  
 C 2.525933 3.258250 -1.352656  
 O 2.576426 1.860471 -1.623879  
 C 3.490713 1.495890 -2.659804  
 C 3.335556 0.027410 -2.992411  
 O 3.687690 -0.757772 -1.865803  
 H 2.542774 -2.381535 -2.473648  
 H 4.281378 -2.503928 -2.820436  
 H 4.688327 -2.519847 -0.307163  
 H 3.894838 -3.961933 -0.988391  
 H 3.820661 -2.777972 1.814854  
 H 3.007325 -4.300349 1.371979  
 H 1.879104 -3.374140 3.279042  
 H 0.790451 -3.212427 1.886602  
 H -0.301556 -1.221514 2.982820  
 H 0.781314 -1.551011 4.356371  
 H 1.907106 0.681353 3.879297  
 H 0.260206 0.732794 4.551764  
 H 0.186491 3.007030 3.584328

H 1.756844 2.773798 2.804966  
 H 0.240751 4.444810 1.679196  
 H -0.938970 3.153911 1.387961  
 H 2.718253 2.961647 0.756055  
 H 2.109268 4.567073 0.281006  
 H 3.527415 3.697993 -1.444742  
 H 1.864144 3.756112 -2.073104  
 H 4.516692 1.703922 -2.331744  
 H 3.287826 2.080939 -3.566743  
 H 3.987922 -0.203643 -3.847388  
 H 2.298470 -0.180995 -3.291616

H<sup>+</sup>R[N<sub>ω</sub>]-tg.g.gg(-00/+0/+0/+00/-00/+00) 5534

C -3.404420 1.698567 -1.014041  
 C -4.795027 1.440208 -0.400246  
 C -5.105831 0.057071 0.230810  
 H -6.200609 -0.007430 0.303926  
 C -4.697641 -1.101870 -0.668845  
 O -3.907690 -1.970384 -0.376243  
 O -5.346256 -1.064656 -1.843397  
 N -4.455066 -0.109881 1.536596  
 C -2.193474 1.756383 -0.067416  
 N -1.842724 0.448823 0.477873  
 C -0.803059 -0.315094 0.122851  
 N -0.890307 -1.639283 0.345161  
 N 0.286863 0.191073 -0.444741  
 H -3.199905 0.968213 -1.804835  
 H -3.464623 2.670768 -1.515092  
 H -5.535583 1.601307 -1.186992  
 H -5.002492 2.194202 0.368282  
 H -4.812398 0.578844 2.191754  
 H -4.654786 -1.027505 1.924569  
 H -2.392708 2.438045 0.765758  
 H -1.337056 2.162250 -0.603459  
 H -2.591171 0.016048 1.028875  
 H -0.053602 -2.217313 0.303551  
 H 1.020799 -0.425522 -0.781817  
 H 0.546074 1.167361 -0.325001  
 H -5.075806 -1.834849 -2.367544  
 H -1.805390 -2.066011 0.387429  
 C 2.887999 2.537576 -2.113836  
 C 1.820300 3.444832 -1.526105  
 O 1.294213 3.000577 -0.273431  
 C 2.080562 3.351650 0.868777  
 C 1.265848 3.103932 2.128118  
 O 1.046168 1.728785 2.409699  
 C 2.023551 1.144790 3.265534  
 C 1.647507 -0.287090 3.579174  
 O 1.990205 -1.128222 2.487727  
 C 1.674738 -2.489941 2.713107  
 C 2.281117 -3.335967 1.615535  
 O 1.651314 -3.058576 0.362910



H<sup>+</sup>R[N<sub>ω</sub>]-ttg.gg.t(-00/+0+/++0/--0/-00/--0) 5707

|   |           |           |           |
|---|-----------|-----------|-----------|
| C | -4.369520 | -2.313405 | -1.010989 |
| C | -5.063079 | -0.989778 | -0.631197 |
| C | -4.282361 | 0.317219  | -0.862360 |
| H | -5.009980 | 1.140636  | -0.789032 |
| C | -3.290401 | 0.607206  | 0.271301  |
| O | -3.425791 | 0.195955  | 1.401254  |
| O | -2.292057 | 1.406168  | -0.118636 |
| N | -3.587499 | 0.320994  | -2.164829 |
| C | -3.016889 | -2.605647 | -0.353584 |
| N | -1.971710 | -1.752392 | -0.929856 |
| C | -0.696324 | -1.738420 | -0.536363 |
| N | 0.147699  | -0.828756 | -1.020837 |
| N | -0.229498 | -2.655673 | 0.325709  |
| H | -4.250983 | -2.388007 | -2.096689 |
| H | -5.046582 | -3.124264 | -0.729174 |
| H | -5.993443 | -0.933870 | -1.205219 |
| H | -5.350391 | -1.011294 | 0.421928  |
| H | -4.253362 | 0.171151  | -2.917687 |
| H | -3.150220 | 1.223220  | -2.325224 |
| H | -2.765174 | -3.657633 | -0.529687 |
| H | -3.080760 | -2.438233 | 0.727413  |
| H | -2.284422 | -1.057494 | -1.619778 |
| H | 1.148096  | -0.894117 | -0.860528 |
| H | -0.858569 | -3.321858 | 0.739567  |
| H | 0.672582  | -2.495414 | 0.775822  |
| H | -1.678862 | 1.594203  | 0.645197  |
| H | -0.164030 | -0.026984 | -1.546634 |
| C | 0.318206  | 3.709570  | 0.549459  |
| C | 0.244192  | 3.091750  | 1.928769  |
| O | -0.580949 | 1.926578  | 1.884855  |
| C | -0.779632 | 1.244511  | 3.127515  |
| C | 0.464804  | 0.584258  | 3.697660  |
| O | 1.042863  | -0.284227 | 2.735145  |
| C | 2.141874  | -1.030062 | 3.236737  |
| C | 3.108997  | -1.351288 | 2.118575  |
| O | 2.503963  | -2.225197 | 1.161527  |
| C | 3.415723  | -2.812566 | 0.230650  |
| C | 4.059360  | -1.832224 | -0.736660 |
| O | 3.053786  | -1.195936 | -1.514137 |
| C | 3.584983  | -0.317710 | -2.505780 |
| C | 2.451427  | 0.284287  | -3.322093 |
| O | 1.599763  | 1.159701  | -2.590178 |
| C | 2.120388  | 2.475886  | -2.419710 |
| C | 1.142732  | 3.324201  | -1.638154 |
| O | 1.094988  | 2.876078  | -0.294052 |
| H | 0.778415  | 4.705268  | 0.635075  |
| H | -0.693534 | 3.842114  | 0.140331  |
| H | -0.181158 | 3.819978  | 2.632451  |
| H | 1.253778  | 2.828160  | 2.259236  |
| H | -1.546210 | 0.499724  | 2.916330  |
| H | -1.177243 | 1.942714  | 3.876866  |

|   |          |           |           |
|---|----------|-----------|-----------|
| H | 0.153222 | 0.030735  | 4.596145  |
| H | 1.208197 | 1.328574  | 4.017256  |
| H | 1.789721 | -1.950644 | 3.722018  |
| H | 2.695834 | -0.446124 | 3.984854  |
| H | 3.993513 | -1.840031 | 2.549212  |
| H | 3.420539 | -0.418983 | 1.635445  |
| H | 2.831156 | -3.546680 | -0.327220 |
| H | 4.209358 | -3.344355 | 0.772091  |
| H | 4.740778 | -2.400122 | -1.386232 |
| H | 4.660337 | -1.079859 | -0.208322 |
| H | 4.240305 | -0.879964 | -3.185948 |
| H | 4.191659 | 0.461865  | -2.026288 |
| H | 1.813025 | -0.519743 | -3.694682 |
| H | 2.881103 | 0.804907  | -4.188709 |
| H | 2.284565 | 2.938218  | -3.403398 |
| H | 3.077793 | 2.453015  | -1.885497 |
| H | 0.145291 | 3.272761  | -2.097689 |
| H | 1.483297 | 4.369541  | -1.683784 |

H<sup>+</sup>R[N<sub>ω</sub>]-tcgg.gt(--0/-0+/+00/-00/+0+/+00) 3651

|   |           |           |           |
|---|-----------|-----------|-----------|
| C | 3.173835  | -2.480025 | -1.246314 |
| C | 4.224810  | -1.696400 | -0.434951 |
| C | 4.426879  | -0.196952 | -0.756663 |
| H | 5.388669  | 0.089457  | -0.300614 |
| C | 3.424912  | 0.762098  | -0.110347 |
| O | 3.081088  | 1.802252  | -0.636216 |
| O | 3.007714  | 0.372124  | 1.091055  |
| N | 4.401551  | 0.057131  | -2.204764 |
| C | 1.719167  | -2.015183 | -1.143177 |
| N | 1.556148  | -0.719015 | -1.813074 |
| C | 0.508363  | 0.094426  | -1.660322 |
| N | -0.577119 | -0.278281 | -0.998452 |
| N | 0.548455  | 1.327519  | -2.229314 |
| H | 3.205263  | -3.515420 | -0.895483 |
| H | 3.459225  | -2.515466 | -2.302477 |
| H | 4.015284  | -1.786510 | 0.632402  |
| H | 5.187513  | -2.192073 | -0.597308 |
| H | 5.124683  | -0.479321 | -2.674288 |
| H | 4.579870  | 1.039953  | -2.389410 |
| H | 1.415078  | -1.924615 | -0.096025 |
| H | 1.069879  | -2.758912 | -1.616412 |
| H | 2.378814  | -0.362179 | -2.307124 |
| H | -0.685107 | -1.195142 | -0.570164 |
| H | -0.024628 | 2.021859  | -1.753142 |
| H | 1.478300  | 1.671728  | -2.429685 |
| H | 2.277301  | 0.956102  | 1.411558  |
| H | -1.364710 | 0.356254  | -0.898679 |
| C | -4.167269 | 0.973501  | -1.571069 |
| C | -4.586308 | -0.357041 | -0.986706 |
| O | -3.506126 | -1.269373 | -1.080952 |
| C | -3.770535 | -2.541603 | -0.514976 |
| C | -2.482825 | -3.346724 | -0.542125 |

|                                                                         |           |           |           |   |           |           |           |
|-------------------------------------------------------------------------|-----------|-----------|-----------|---|-----------|-----------|-----------|
| O                                                                       | -1.452473 | -2.752821 | 0.253210  | H | -3.663845 | 3.020522  | -1.588631 |
| C                                                                       | -1.450613 | -3.113131 | 1.637203  | H | -3.856366 | 1.671195  | -2.677882 |
| C                                                                       | -1.091686 | -1.927781 | 2.510539  | H | -4.137791 | 1.628878  | 0.387756  |
| O                                                                       | 0.246224  | -1.524168 | 2.252359  | H | -5.431518 | 1.617642  | -0.786665 |
| C                                                                       | 0.826882  | -0.704060 | 3.256813  | H | -4.533707 | -1.862231 | -1.864134 |
| C                                                                       | 0.327728  | 0.734027  | 3.306525  | H | -5.265316 | -0.514604 | -2.446342 |
| O                                                                       | 0.694093  | 1.455487  | 2.124250  | H | -1.478496 | 2.335898  | -2.272825 |
| C                                                                       | 0.243560  | 2.815402  | 2.148903  | H | -1.663420 | 1.910858  | -0.563158 |
| C                                                                       | 0.305484  | 3.433224  | 0.760571  | H | -2.502550 | -0.288360 | -2.190433 |
| O                                                                       | -0.686319 | 2.946081  | -0.149077 | H | 0.479480  | 1.305598  | -0.840754 |
| C                                                                       | -1.988063 | 3.503970  | 0.017956  | H | 0.229454  | -2.133369 | -1.240977 |
| C                                                                       | -2.920409 | 2.931006  | -1.026344 | H | -1.313304 | -2.149310 | -1.922018 |
| O                                                                       | -3.129407 | 1.545511  | -0.770819 | H | -2.059559 | -0.732358 | 1.609436  |
| H                                                                       | -3.821008 | 0.844861  | -2.604548 | H | 1.396046  | -0.141175 | -1.064429 |
| H                                                                       | -5.039952 | 1.639577  | -1.579647 | C | 0.337717  | -0.827699 | 3.065002  |
| H                                                                       | -5.458014 | -0.727079 | -1.546079 | C | -0.089265 | 0.596186  | 3.352633  |
| H                                                                       | -4.883883 | -0.224069 | 0.062986  | O | 0.039056  | 1.387281  | 2.181338  |
| H                                                                       | -4.541328 | -3.074372 | -1.091894 | C | 0.228610  | 2.768394  | 2.440840  |
| H                                                                       | -4.141880 | -2.432393 | 0.515013  | C | 0.131538  | 3.537579  | 1.130871  |
| H                                                                       | -2.099341 | -3.379505 | -1.564065 | O | 0.996469  | 3.064182  | 0.101292  |
| H                                                                       | -2.675154 | -4.375810 | -0.217994 | C | 2.359165  | 3.463834  | 0.254916  |
| H                                                                       | -0.733183 | -3.926649 | 1.795239  | C | 3.203777  | 2.859058  | -0.842664 |
| H                                                                       | -2.442922 | -3.465301 | 1.941161  | O | 3.330409  | 1.460332  | -0.626740 |
| H                                                                       | -1.196834 | -2.237376 | 3.561101  | C | 4.218639  | 0.832274  | -1.539748 |
| H                                                                       | -1.794253 | -1.105564 | 2.322018  | C | 4.291475  | -0.644498 | -1.225721 |
| H                                                                       | 1.900932  | -0.720836 | 3.068266  | O | 3.037195  | -1.252480 | -1.538462 |
| H                                                                       | 0.654006  | -1.144366 | 4.249657  | C | 3.027225  | -2.676505 | -1.472190 |
| H                                                                       | 0.771664  | 1.215323  | 4.189393  | C | 2.700476  | -3.219745 | -0.092139 |
| H                                                                       | -0.762639 | 0.770243  | 3.420490  | O | 1.362147  | -2.863398 | 0.256331  |
| H                                                                       | 0.879566  | 3.403056  | 2.825176  | C | 0.993205  | -3.339982 | 1.548981  |
| H                                                                       | -0.778129 | 2.846529  | 2.545195  | C | -0.387097 | -2.854913 | 1.961979  |
| H                                                                       | 1.270666  | 3.214054  | 0.300736  | O | -0.531494 | -1.436102 | 2.106409  |
| H                                                                       | 0.211630  | 4.522462  | 0.860976  | H | 0.312259  | -1.398726 | 4.003431  |
| H                                                                       | -1.945535 | 4.595191  | -0.102351 | H | 1.363058  | -0.819401 | 2.681805  |
| H                                                                       | -2.382877 | 3.279455  | 1.015466  | H | 0.565649  | 0.974645  | 4.149920  |
| H                                                                       | -2.507105 | 3.080564  | -2.033616 | H | -1.123068 | 0.629313  | 3.723618  |
| H                                                                       | -3.874925 | 3.471546  | -0.970181 | H | 1.198194  | 2.925906  | 2.934277  |
|                                                                         |           |           |           | H | -0.549552 | 3.158972  | 3.113517  |
|                                                                         |           |           |           | H | 0.317208  | 4.602464  | 1.325895  |
|                                                                         |           |           |           | H | -0.880405 | 3.443690  | 0.733624  |
|                                                                         |           |           |           | H | 2.751864  | 3.142977  | 1.226195  |
|                                                                         |           |           |           | H | 2.427091  | 4.558708  | 0.195757  |
|                                                                         |           |           |           | H | 4.193369  | 3.337820  | -0.820537 |
|                                                                         |           |           |           | H | 2.752231  | 3.058662  | -1.824563 |
|                                                                         |           |           |           | H | 5.226457  | 1.263033  | -1.450270 |
|                                                                         |           |           |           | H | 3.874278  | 0.975314  | -2.573168 |
|                                                                         |           |           |           | H | 4.543118  | -0.786408 | -0.167411 |
|                                                                         |           |           |           | H | 5.082790  | -1.097611 | -1.837006 |
|                                                                         |           |           |           | H | 3.995486  | -3.079292 | -1.793936 |
|                                                                         |           |           |           | H | 2.274554  | -3.011736 | -2.189803 |
|                                                                         |           |           |           | H | 3.394569  | -2.823206 | 0.660767  |
|                                                                         |           |           |           | H | 2.808251  | -4.313577 | -0.107548 |
| H <sup>+</sup> R[N <sub>ω</sub> ]-tcgg.gt(-00/--0/-00/+0+/-00/--0) 7677 |           |           |           |   |           |           |           |
| C                                                                       | -3.516502 | 1.940033  | -1.673268 |   |           |           |           |
| C                                                                       | -4.408441 | 1.271482  | -0.607800 |   |           |           |           |
| C                                                                       | -4.451888 | -0.273991 | -0.566310 |   |           |           |           |
| H                                                                       | -5.351074 | -0.544166 | 0.010738  |   |           |           |           |
| C                                                                       | -3.314458 | -0.960511 | 0.195700  |   |           |           |           |
| O                                                                       | -2.913364 | -2.067466 | -0.111241 |   |           |           |           |
| O                                                                       | -2.845513 | -0.265014 | 1.224006  |   |           |           |           |
| N                                                                       | -4.464744 | -0.850368 | -1.919653 |   |           |           |           |
| C                                                                       | -2.011686 | 1.682532  | -1.574194 |   |           |           |           |
| N                                                                       | -1.712155 | 0.281192  | -1.873462 |   |           |           |           |
| C                                                                       | -0.548310 | -0.319966 | -1.614758 |   |           |           |           |
| N                                                                       | 0.510929  | 0.347365  | -1.176114 |   |           |           |           |
| N                                                                       | -0.435485 | -1.653154 | -1.844302 |   |           |           |           |

H 1.754659 -3.036627 2.278807  
 H 0.964414 -4.439056 1.549109  
 H -0.633416 -3.345629 2.913972  
 H -1.135237 -3.140554 1.222348

H<sup>+</sup>R[N<sub>ω</sub>]-tg.tg.tg.(--0/-00/+00/-00/+00/--0) 2928

C -3.013303 -1.329623 0.124988  
 C -4.503662 -1.075152 -0.142659  
 C -4.794606 0.241671 -0.904749  
 H -4.528700 0.111302 -1.958169  
 C -6.297150 0.528232 -0.867029  
 O -6.804947 1.438805 -0.264873  
 O -6.991249 -0.374877 -1.588172  
 N -4.002442 1.359609 -0.376911  
 C -2.139024 -1.362475 -1.141908  
 N -0.722764 -1.116269 -0.885065  
 C -0.194526 0.106580 -0.725750  
 N -0.972862 1.203197 -0.734993  
 N 1.121080 0.244191 -0.617113  
 H -2.627044 -0.564140 0.800493  
 H -2.912518 -2.278727 0.659772  
 H -5.023796 -1.050840 0.821383  
 H -4.947626 -1.897984 -0.708745  
 H -4.263054 2.210811 -0.870508  
 H -4.274712 1.532527 0.589678  
 H -2.215843 -2.331945 -1.638524  
 H -2.473526 -0.618936 -1.867777  
 H -0.129970 -1.885447 -0.577250  
 H -1.989745 1.182416 -0.594533  
 H 1.751399 -0.539030 -0.762077  
 H 1.519205 1.109641 -0.262026  
 H -7.934751 -0.159049 -1.518989  
 H -0.508906 2.098353 -0.702276  
 C 3.533116 -2.879829 -0.837129  
 C 2.225647 -3.633375 -0.657253  
 O 1.281672 -2.990126 0.201732  
 C 1.555689 -3.113667 1.602039  
 C 0.344043 -2.658855 2.401511  
 O 0.124632 -1.255059 2.380149  
 C 0.759644 -0.550691 3.444257  
 C 0.416387 0.921148 3.367680  
 O 1.205656 1.550221 2.367860  
 C 0.919960 2.927610 2.205200  
 C 1.991289 3.562193 1.347033  
 O 1.980880 2.999284 0.033103  
 C 3.066349 3.472153 -0.772724  
 C 3.287351 2.552659 -1.953393  
 O 3.764023 1.303572 -1.478098  
 C 4.083545 0.382905 -2.510851  
 C 4.448281 -0.951952 -1.899185  
 O 3.268640 -1.619657 -1.441797  
 H 4.181694 -3.484207 -1.487073

H 4.059120 -2.738872 0.116788  
 H 2.442001 -4.642959 -0.284874  
 H 1.729250 -3.724954 -1.625576  
 H 2.441007 -2.527125 1.874121  
 H 1.756689 -4.167947 1.836836  
 H 0.452636 -3.015611 3.434400  
 H -0.551481 -3.125796 1.982480  
 H 0.405876 -0.945243 4.407292  
 H 1.850407 -0.667431 3.405439  
 H -0.654480 1.037283 3.150366  
 H 0.617942 1.383270 4.345015  
 H -0.074845 3.064760 1.755077  
 H 0.917785 3.443698 3.176652  
 H 1.814231 4.644991 1.293158  
 H 2.972202 3.392973 1.807358  
 H 2.848964 4.486627 -1.131460  
 H 3.981464 3.505165 -0.170207  
 H 2.354991 2.416913 -2.520294  
 H 4.023681 3.020193 -2.622937  
 H 4.939332 0.750281 -3.095075  
 H 3.232708 0.256252 -3.194534  
 H 5.145650 -0.799379 -1.065815  
 H 4.943064 -1.571417 -2.658725

H<sup>+</sup>R[N<sub>ω</sub>]-tg.g.g.tg.(+00/-00/+00/--0/-00/+0+) 54

C -2.983515 -1.736313 -1.056171  
 C -4.413579 -1.373665 -1.499824  
 C -4.780187 0.116292 -1.314830  
 H -5.820938 0.240491 -1.648158  
 C -4.788987 0.521020 0.154976  
 O -4.176661 1.451627 0.620014  
 O -5.595867 -0.271415 0.884815  
 N -3.857386 1.010833 -2.033155  
 C -1.945965 -1.605417 -2.190870  
 N -0.576718 -1.388568 -1.732197  
 C -0.104520 -0.211057 -1.278646  
 N 1.145391 -0.148736 -0.826740  
 N -0.856202 0.891634 -1.341976  
 H -2.965118 -2.760382 -0.674913  
 H -2.674947 -1.103451 -0.219834  
 H -5.142506 -1.962959 -0.941569  
 H -4.561071 -1.632747 -2.554626  
 H -4.081308 1.009715 -3.024255  
 H -3.982694 1.964007 -1.700726  
 H -2.216309 -0.787827 -2.860501  
 H -1.936301 -2.509563 -2.802700  
 H 0.047537 -2.176525 -1.659469  
 H 1.539863 0.738476 -0.531486  
 H -1.838907 0.860438 -1.624466  
 H -0.548578 1.690553 -0.788473  
 H -5.605117 0.063087 1.794920  
 H 1.615085 -0.988475 -0.497906





|   |           |           |           |
|---|-----------|-----------|-----------|
| H | -4.972601 | -0.108328 | -0.363129 |
| H | -4.600893 | -2.762366 | -1.975762 |
| H | -4.313547 | -2.510952 | -0.242003 |
| H | -2.138858 | -3.063876 | -2.332723 |
| H | -2.870070 | -4.323252 | -1.321112 |
| H | -1.599494 | -4.702720 | 0.740021  |
| H | -2.852627 | -3.526851 | 1.205675  |
| H | 0.148086  | -3.081180 | 1.577225  |
| H | -0.960097 | -3.698952 | 2.820352  |

H<sup>+</sup>R[N<sub>ω</sub>]-tcgg.gt(-00/+0+/-00/+0+/-00) 3983

|   |           |           |           |
|---|-----------|-----------|-----------|
| C | 3.425014  | -2.382812 | -1.245903 |
| C | 4.371656  | -1.620777 | -0.297116 |
| C | 4.534170  | -0.097440 | -0.508163 |
| H | 5.449802  | 0.195208  | 0.030955  |
| C | 3.449787  | 0.785383  | 0.114109  |
| O | 3.130798  | 1.853827  | -0.372080 |
| O | 2.924925  | 0.302954  | 1.235291  |
| N | 4.594073  | 0.246300  | -1.936827 |
| C | 1.944540  | -1.997421 | -1.206532 |
| N | 1.758093  | -0.638003 | -1.719976 |
| C | 0.637031  | 0.077497  | -1.595535 |
| N | -0.469874 | -0.432176 | -1.077133 |
| N | 0.619631  | 1.358753  | -2.047406 |
| H | 3.781703  | -2.308631 | -2.277638 |
| H | 3.486976  | -3.442889 | -0.984105 |
| H | 5.364091  | -2.068982 | -0.410122 |
| H | 4.080602  | -1.790154 | 0.741458  |
| H | 4.745029  | 1.244502  | -2.048372 |
| H | 5.364333  | -0.234797 | -2.390972 |
| H | 1.367019  | -2.705659 | -1.810122 |
| H | 1.569542  | -2.052922 | -0.180466 |
| H | 2.586492  | -0.193853 | -2.126492 |
| H | -1.331820 | 0.107989  | -1.095937 |
| H | 1.529509  | 1.777689  | -2.186215 |
| H | -0.020297 | 1.971465  | -1.546240 |
| H | 2.166465  | 0.881235  | 1.517802  |
| H | -0.511009 | -1.320675 | -0.584922 |
| C | 0.605786  | 3.047934  | 1.552233  |
| C | -0.758557 | 3.540220  | 1.101170  |
| O | -1.152604 | 2.945144  | -0.133994 |
| C | -2.453742 | 3.365255  | -0.542874 |
| C | -2.880519 | 2.598422  | -1.784006 |
| O | -2.999269 | 1.191528  | -1.597499 |
| C | -4.142853 | 0.772089  | -0.852643 |
| C | -4.400979 | -0.697139 | -1.113169 |
| O | -3.259733 | -1.438154 | -0.710834 |
| C | -3.467560 | -2.836479 | -0.613452 |
| C | -2.107727 | -3.527792 | -0.551015 |
| O | -1.185680 | -2.933871 | 0.362540  |
| C | -1.565294 | -3.025229 | 1.735807  |
| C | -0.534333 | -2.345124 | 2.608840  |

|   |           |           |           |
|---|-----------|-----------|-----------|
| O | -0.607463 | -0.939580 | 2.421412  |
| C | 0.180501  | -0.207991 | 3.344895  |
| C | 0.006057  | 1.275349  | 3.095307  |
| O | 0.674706  | 1.655494  | 1.886271  |
| H | 1.342656  | 3.186769  | 0.760257  |
| H | 0.911773  | 3.650773  | 2.418078  |
| H | -0.690459 | 4.631699  | 0.986157  |
| H | -1.525318 | 3.340945  | 1.860999  |
| H | -2.449678 | 4.438960  | -0.778882 |
| H | -3.165611 | 3.209721  | 0.278502  |
| H | -2.142856 | 2.729739  | -2.578634 |
| H | -3.832562 | 3.013993  | -2.140224 |
| H | -5.025822 | 1.346025  | -1.163720 |
| H | -3.981282 | 0.931901  | 0.220260  |
| H | -4.606192 | -0.867665 | -2.178385 |
| H | -5.287381 | -0.998214 | -0.536427 |
| H | -3.998885 | -3.224351 | -1.494143 |
| H | -4.084432 | -3.063364 | 0.267208  |
| H | -1.621928 | -3.461954 | -1.526077 |
| H | -2.254188 | -4.589950 | -0.311782 |
| H | -1.638668 | -4.082340 | 2.026154  |
| H | -2.536752 | -2.547111 | 1.899083  |
| H | 0.473231  | -2.716147 | 2.373040  |
| H | -0.751902 | -2.601966 | 3.656092  |
| H | 1.239629  | -0.490309 | 3.266090  |
| H | -0.144213 | -0.419413 | 4.374739  |
| H | 0.428057  | 1.837307  | 3.939233  |
| H | -1.062430 | 1.498887  | 3.022570  |

H<sup>+</sup>R[N<sub>ω</sub>]-tg.g.gg(+00/--0/--0/-00/+00/--0) 622

|   |           |           |           |
|---|-----------|-----------|-----------|
| C | 3.594654  | 1.279189  | 1.204419  |
| C | 4.973346  | 1.095665  | 0.538586  |
| C | 5.221523  | -0.131336 | -0.377881 |
| H | 6.312337  | -0.220211 | -0.481167 |
| C | 4.775417  | -1.439475 | 0.260615  |
| O | 3.959200  | -2.201416 | -0.204870 |
| O | 5.422838  | -1.671487 | 1.413601  |
| N | 4.554002  | 0.008434  | -1.678308 |
| C | 2.390052  | 1.591596  | 0.299106  |
| N | 1.969219  | 0.443914  | -0.499452 |
| C | 0.920369  | -0.353171 | -0.259290 |
| N | -0.136320 | 0.069273  | 0.439586  |
| N | 0.956903  | -1.608954 | -0.724255 |
| H | 3.354640  | 0.407523  | 1.823456  |
| H | 3.697938  | 2.119069  | 1.900066  |
| H | 5.215949  | 1.987094  | -0.051920 |
| H | 5.719670  | 1.050485  | 1.335012  |
| H | 4.704919  | -0.816827 | -2.251645 |
| H | 4.940185  | 0.800892  | -2.182375 |
| H | 2.632537  | 2.413718  | -0.381917 |
| H | 1.554890  | 1.927357  | 0.911729  |
| H | 2.694250  | 0.103885  | -1.139682 |

|                                                                      |           |           |           |   |           |           |           |
|----------------------------------------------------------------------|-----------|-----------|-----------|---|-----------|-----------|-----------|
| H                                                                    | -0.878048 | -0.584766 | 0.665851  | H | 6.199930  | -0.741893 | -0.272714 |
| H                                                                    | 1.852568  | -2.031599 | -0.923939 | C | 4.486173  | -1.288804 | 0.754801  |
| H                                                                    | 0.099161  | -2.157190 | -0.786097 | O | 3.775690  | -2.256483 | 0.602352  |
| H                                                                    | 5.127288  | -2.526649 | 1.763498  | O | 4.859592  | -0.841070 | 1.964859  |
| H                                                                    | -0.389803 | 1.054694  | 0.451299  | N | 4.567995  | -0.967405 | -1.645014 |
| C                                                                    | -0.836765 | 3.787830  | -0.534755 | C | 2.428250  | 1.440590  | -0.240722 |
| C                                                                    | -1.677950 | 3.237432  | -1.672393 | N | 2.010561  | 0.088774  | -0.621927 |
| O                                                                    | -1.060741 | 2.055455  | -2.155031 | C | 0.909162  | -0.530606 | -0.170764 |
| C                                                                    | -1.728090 | 1.452148  | -3.259602 | N | -0.104636 | 0.153663  | 0.344151  |
| C                                                                    | -2.825024 | 0.475603  | -2.865029 | N | 0.859740  | -1.870701 | -0.235485 |
| O                                                                    | -2.235411 | -0.743410 | -2.435460 | H | 3.968895  | 2.836550  | -0.680190 |
| C                                                                    | -3.184624 | -1.704422 | -2.012432 | H | 3.764526  | 1.619194  | -1.912282 |
| C                                                                    | -2.483938 | -3.031655 | -1.786571 | H | 5.913242  | 1.468915  | -0.736649 |
| O                                                                    | -1.544220 | -2.998400 | -0.704205 | H | 5.145833  | 1.301474  | 0.820028  |
| C                                                                    | -1.885881 | -3.721958 | 0.476531  | H | 5.052122  | -0.544560 | -2.430893 |
| C                                                                    | -2.877013 | -3.010574 | 1.379251  | H | 4.667920  | -1.974653 | -1.729523 |
| O                                                                    | -2.312787 | -1.790030 | 1.838855  | H | 2.447869  | 1.523338  | 0.853131  |
| C                                                                    | -3.153574 | -1.126120 | 2.779905  | H | 1.706686  | 2.176660  | -0.604915 |
| C                                                                    | -2.484038 | 0.126539  | 3.294384  | H | 2.687871  | -0.461859 | -1.157227 |
| O                                                                    | -2.427555 | 1.098421  | 2.261234  | H | -0.886415 | -0.330397 | 0.777108  |
| C                                                                    | -1.947112 | 2.357026  | 2.708040  | H | -0.021640 | -2.350020 | -0.058382 |
| C                                                                    | -1.931025 | 3.324808  | 1.548132  | H | 1.728932  | -2.385664 | -0.222369 |
| O                                                                    | -0.877604 | 2.979781  | 0.646188  | H | 4.488887  | -1.436139 | 2.635101  |
| H                                                                    | -1.154909 | 4.810219  | -0.298229 | H | -0.237657 | 1.147534  | 0.171047  |
| H                                                                    | 0.207992  | 3.820460  | -0.851138 | C | -1.538518 | 3.662090  | -0.921304 |
| H                                                                    | -2.705425 | 3.043774  | -1.333744 | C | -1.452301 | 2.891645  | -2.219138 |
| H                                                                    | -1.727716 | 3.994245  | -2.470199 | O | -2.112018 | 1.648348  | -2.072438 |
| H                                                                    | -2.151404 | 2.227297  | -3.912207 | C | -2.170375 | 0.901030  | -3.279165 |
| H                                                                    | -0.965023 | 0.912341  | -3.824471 | C | -3.011333 | -0.339227 | -3.076418 |
| H                                                                    | -3.454978 | 0.898146  | -2.068846 | O | -2.287576 | -1.305396 | -2.328697 |
| H                                                                    | -3.469463 | 0.290102  | -3.737836 | C | -3.048132 | -2.465474 | -2.051542 |
| H                                                                    | -3.952081 | -1.855168 | -2.788186 | C | -2.177508 | -3.471583 | -1.320052 |
| H                                                                    | -3.691256 | -1.364837 | -1.097907 | O | -1.754131 | -3.038321 | -0.022442 |
| H                                                                    | -3.232569 | -3.811519 | -1.609048 | C | -2.719966 | -3.221740 | 1.010689  |
| H                                                                    | -1.923421 | -3.296252 | -2.687216 | C | -2.252342 | -2.554599 | 2.284639  |
| H                                                                    | -0.947156 | -3.866906 | 1.016022  | O | -2.296801 | -1.138332 | 2.132238  |
| H                                                                    | -2.283522 | -4.710154 | 0.213957  | C | -2.251532 | -0.432219 | 3.372953  |
| H                                                                    | -3.825241 | -2.818395 | 0.857345  | C | -2.653668 | 1.010429  | 3.161921  |
| H                                                                    | -3.097903 | -3.670892 | 2.231123  | O | -1.639631 | 1.688175  | 2.437972  |
| H                                                                    | -4.113751 | -0.868623 | 2.313177  | C | -1.943324 | 3.048118  | 2.174658  |
| H                                                                    | -3.352904 | -1.791971 | 3.631140  | C | -0.807455 | 3.647960  | 1.363395  |
| H                                                                    | -3.072372 | 0.507117  | 4.142010  | O | -0.676785 | 3.076181  | 0.058883  |
| H                                                                    | -1.473696 | -0.107132 | 3.658207  | H | -2.578026 | 3.658870  | -0.574842 |
| H                                                                    | -0.936421 | 2.259091  | 3.129327  | H | -1.232007 | 4.702243  | -1.095201 |
| H                                                                    | -2.604232 | 2.758367  | 3.493186  | H | -1.932062 | 3.490529  | -3.008096 |
| H                                                                    | -2.902726 | 3.296880  | 1.040866  | H | -0.399656 | 2.746372  | -2.504775 |
| H                                                                    | -1.766647 | 4.341598  | 1.928899  | H | -2.630354 | 1.508292  | -4.072791 |
|                                                                      |           |           |           | H | -1.160776 | 0.617474  | -3.607857 |
|                                                                      |           |           |           | H | -3.940778 | -0.067689 | -2.557044 |
|                                                                      |           |           |           | H | -3.278046 | -0.750452 | -4.061480 |
|                                                                      |           |           |           | H | -3.397037 | -2.934970 | -2.984937 |
|                                                                      |           |           |           | H | -3.940426 | -2.206554 | -1.462977 |
| H <sup>+</sup> R[N <sub>ω</sub> ]-tg.g.gg.t(+00/-00/+0+/-00/-00/+0+) | 185       |           |           |   |           |           |           |
| C                                                                    | 3.804081  | 1.765357  | -0.828347 |   |           |           |           |
| C                                                                    | 5.035084  | 1.049214  | -0.236692 |   |           |           |           |
| C                                                                    | 5.131678  | -0.494932 | -0.377117 |   |           |           |           |

H -2.709033 -4.427943 -1.238244  
 H -1.262931 -3.636845 -1.892885  
 H -2.858513 -4.295313 1.198745  
 H -3.684333 -2.792685 0.717808  
 H -2.925399 -2.863876 3.095442  
 H -1.237218 -2.885451 2.544469  
 H -2.956762 -0.887539 4.080865  
 H -1.244807 -0.484726 3.807989  
 H -3.607110 1.052235 2.617577  
 H -2.798641 1.479845 4.146216  
 H -2.040417 3.612094 3.114837  
 H -2.899143 3.127990 1.638041  
 H -0.941548 4.734070 1.287236  
 H 0.137851 3.456922 1.875988

H<sup>+</sup>R[N<sub>ω</sub>]-tgtg.gt(-0/-00/+00/-00/+00/--0) 544

C -3.173554 -2.521523 -1.052714  
 C -4.274228 -1.489259 -1.389715  
 C -4.499383 -0.389903 -0.325179  
 H -4.649524 -0.879775 0.641057  
 C -5.781058 0.379268 -0.658280  
 O -5.800741 1.490632 -1.123717  
 O -6.885480 -0.342023 -0.391606  
 N -3.351633 0.519491 -0.222406  
 C -1.768338 -2.253570 -1.605435  
 N -1.133619 -1.098740 -0.974588  
 C 0.144234 -0.749982 -1.162372  
 N 0.936740 -1.437239 -2.002829  
 N 0.636373 0.324107 -0.545334  
 H -3.479048 -3.484602 -1.470653  
 H -3.113598 -2.669579 0.031022  
 H -5.219661 -2.023114 -1.507919  
 H -4.067280 -1.012404 -2.355239  
 H -3.461617 1.258014 -0.916729  
 H -3.341688 0.988808 0.678568  
 H -1.155773 -3.142129 -1.419884  
 H -1.832970 -2.114773 -2.693820  
 H -1.784289 -0.396340 -0.580676  
 H 1.945290 -1.399674 -1.845015  
 H 0.195890 0.694824 0.293148  
 H 1.587233 0.629422 -0.731752  
 H -7.662053 0.179201 -0.650944  
 H 0.571826 -2.248092 -2.472506  
 C 3.518059 -2.987625 0.235959  
 C 4.335719 -1.782636 -0.201831  
 O 3.720576 -1.191510 -1.351376  
 C 4.508479 -0.218954 -2.040038  
 C 4.553796 1.145301 -1.375036  
 O 3.247189 1.708041 -1.343247  
 C 3.258697 3.105418 -1.040996  
 C 1.844095 3.626511 -0.930522  
 O 1.276525 3.161221 0.283894

C -0.061046 3.580842 0.492856  
 C -0.511969 3.089222 1.850149  
 O -0.633282 1.664459 1.842938  
 C -0.647560 1.105991 3.156483  
 C -0.594476 -0.404221 3.093013  
 O 0.666267 -0.812362 2.593647  
 C 0.912370 -2.201924 2.756393  
 C 2.290339 -2.546618 2.235339  
 O 2.264498 -2.647097 0.814027  
 H 4.116607 -3.586159 0.934805  
 H 3.308843 -3.610180 -0.638461  
 H 4.414097 -1.051917 0.611515  
 H 5.348210 -2.116045 -0.466976  
 H 5.533418 -0.591390 -2.164183  
 H 4.057617 -0.121679 -3.029825  
 H 4.965273 1.090615 -0.358018  
 H 5.224922 1.781188 -1.969774  
 H 3.781881 3.645989 -1.841016  
 H 3.787678 3.283788 -0.096178  
 H 1.871086 4.725651 -0.943032  
 H 1.250289 3.289466 -1.791700  
 H -0.716206 3.189947 -0.299275  
 H -0.130869 4.678259 0.477040  
 H 0.225806 3.394056 2.601580  
 H -1.476869 3.546904 2.107508  
 H 0.216440 1.474052 3.723016  
 H -1.561669 1.411593 3.685313  
 H -0.750052 -0.790184 4.111572  
 H -1.405040 -0.794513 2.459453  
 H 0.158402 -2.797915 2.223435  
 H 0.862946 -2.464277 3.823407  
 H 3.001169 -1.778992 2.567697  
 H 2.598779 -3.510305 2.664598

H<sup>+</sup>R[N<sub>ω</sub>]-ctgg.tg(-00/+00/--0/-00/+00/--0) 2183

C -3.382400 -1.490189 -0.538776  
 C -4.786234 -1.356747 -1.183225  
 C -5.600769 -0.136233 -0.708569  
 H -6.422119 0.022650 -1.416033  
 C -4.766827 1.160669 -0.774022  
 O -3.905867 1.352114 -1.606657  
 O -5.067790 2.056178 0.156076  
 N -6.206012 -0.224767 0.630128  
 C -2.261412 -1.408590 -1.595043  
 N -0.936699 -1.141618 -1.043431  
 C -0.325323 0.056373 -1.038807  
 N 0.959858 0.132896 -0.724808  
 N -0.975799 1.178738 -1.384138  
 H -3.294178 -2.433141 0.008056  
 H -3.215702 -0.697184 0.197803  
 H -4.681414 -1.286038 -2.269265  
 H -5.390056 -2.248305 -0.997106

|   |           |           |           |                                                                        |           |           |           |
|---|-----------|-----------|-----------|------------------------------------------------------------------------|-----------|-----------|-----------|
| H | -5.632956 | -0.756427 | 1.278452  |                                                                        |           |           |           |
| H | -7.125203 | -0.650457 | 0.607686  |                                                                        |           |           |           |
| H | -2.498165 | -0.628441 | -2.317785 |                                                                        |           |           |           |
| H | -2.209143 | -2.347752 | -2.152852 |                                                                        |           |           |           |
| H | -0.400852 | -1.905235 | -0.634787 |                                                                        |           |           |           |
| H | 1.529722  | -0.693542 | -0.584953 |                                                                        |           |           |           |
| H | -0.441020 | 2.033895  | -1.418040 |                                                                        |           |           |           |
| H | -1.986459 | 1.245242  | -1.458241 |                                                                        |           |           |           |
| H | -5.741285 | 1.621064  | 0.731410  |                                                                        |           |           |           |
| H | 1.367724  | 1.032176  | -0.487606 |                                                                        |           |           |           |
| C | 4.350147  | 0.196212  | -1.935223 |                                                                        |           |           |           |
| C | 4.496819  | -1.125622 | -1.213921 |                                                                        |           |           |           |
| O | 3.228528  | -1.772143 | -1.100730 |                                                                        |           |           |           |
| C | 3.312440  | -3.077985 | -0.547782 |                                                                        |           |           |           |
| C | 1.930764  | -3.709920 | -0.571681 |                                                                        |           |           |           |
| O | 0.976675  | -3.021751 | 0.244459  |                                                                        |           |           |           |
| C | 1.046444  | -3.362013 | 1.634386  |                                                                        |           |           |           |
| C | 0.214666  | -2.403921 | 2.457172  |                                                                        |           |           |           |
| O | 0.842984  | -1.137432 | 2.484457  |                                                                        |           |           |           |
| C | 0.194019  | -0.208469 | 3.341107  |                                                                        |           |           |           |
| C | 0.942593  | 1.105927  | 3.342132  |                                                                        |           |           |           |
| O | 0.705214  | 1.801293  | 2.126984  |                                                                        |           |           |           |
| C | 1.365320  | 3.053734  | 2.064109  |                                                                        |           |           |           |
| C | 1.054078  | 3.701060  | 0.726903  |                                                                        |           |           |           |
| O | 1.616792  | 2.995665  | -0.388116 |                                                                        |           |           |           |
| C | 2.960511  | 3.382643  | -0.701725 |                                                                        |           |           |           |
| C | 3.554415  | 2.417537  | -1.702644 |                                                                        |           |           |           |
| O | 3.756078  | 1.159558  | -1.075368 |                                                                        |           |           |           |
| H | 3.739915  | 0.058331  | -2.838219 |                                                                        |           |           |           |
| H | 5.348529  | 0.536547  | -2.245698 |                                                                        |           |           |           |
| H | 4.930954  | -0.963547 | -0.218830 |                                                                        |           |           |           |
| H | 5.180691  | -1.763085 | -1.790639 |                                                                        |           |           |           |
| H | 3.718108  | -3.033390 | 0.472008  |                                                                        |           |           |           |
| H | 3.988580  | -3.704086 | -1.148072 |                                                                        |           |           |           |
| H | 2.002230  | -4.761427 | -0.267230 |                                                                        |           |           |           |
| H | 1.537761  | -3.676495 | -1.590111 |                                                                        |           |           |           |
| H | 2.082398  | -3.319543 | 1.985733  |                                                                        |           |           |           |
| H | 0.672409  | -4.384709 | 1.775765  |                                                                        |           |           |           |
| H | 0.128795  | -2.815769 | 3.474387  |                                                                        |           |           |           |
| H | -0.802297 | -2.327061 | 2.043557  |                                                                        |           |           |           |
| H | 0.169762  | -0.600550 | 4.368669  |                                                                        |           |           |           |
| H | -0.842330 | -0.041328 | 3.014791  |                                                                        |           |           |           |
| H | 2.016861  | 0.917999  | 3.474732  |                                                                        |           |           |           |
| H | 0.592800  | 1.707800  | 4.193972  |                                                                        |           |           |           |
| H | 2.449053  | 2.922602  | 2.195709  |                                                                        |           |           |           |
| H | 1.010890  | 3.719627  | 2.866081  |                                                                        |           |           |           |
| H | 1.402345  | 4.740429  | 0.726074  |                                                                        |           |           |           |
| H | -0.027477 | 3.706901  | 0.575247  |                                                                        |           |           |           |
| H | 3.577914  | 3.386793  | 0.203371  |                                                                        |           |           |           |
| H | 2.958565  | 4.393714  | -1.128591 |                                                                        |           |           |           |
| H | 4.510453  | 2.828411  | -2.058058 |                                                                        |           |           |           |
| H | 2.888341  | 2.311925  | -2.570832 |                                                                        |           |           |           |
|   |           |           |           | H <sup>+</sup> R[N <sub>ω</sub> ]-cgggtg(+00/--0/--0/-00/+00/--+) 2783 |           |           |           |
|   |           |           |           | C                                                                      | 3.170725  | -1.395753 | -0.076393 |
|   |           |           |           | C                                                                      | 4.699843  | -1.466971 | -0.201665 |
|   |           |           |           | C                                                                      | 5.403834  | -0.319055 | -0.967252 |
|   |           |           |           | H                                                                      | 5.124602  | -0.363295 | -2.024487 |
|   |           |           |           | C                                                                      | 4.934203  | 1.058453  | -0.460157 |
|   |           |           |           | O                                                                      | 3.837450  | 1.510827  | -0.713086 |
|   |           |           |           | O                                                                      | 5.814378  | 1.703715  | 0.289989  |
|   |           |           |           | N                                                                      | 6.859421  | -0.418519 | -0.783775 |
|   |           |           |           | C                                                                      | 2.430239  | -1.378607 | -1.422669 |
|   |           |           |           | N                                                                      | 0.982356  | -1.237463 | -1.293532 |
|   |           |           |           | C                                                                      | 0.325544  | -0.080276 | -1.079409 |
|   |           |           |           | N                                                                      | 0.966739  | 1.089881  | -1.082698 |
|   |           |           |           | N                                                                      | -0.997789 | -0.120983 | -0.934331 |
|   |           |           |           | H                                                                      | 2.834953  | -2.264336 | 0.498086  |
|   |           |           |           | H                                                                      | 2.883719  | -0.515686 | 0.502294  |
|   |           |           |           | H                                                                      | 5.124852  | -1.506889 | 0.807415  |
|   |           |           |           | H                                                                      | 4.987135  | -2.401599 | -0.697556 |
|   |           |           |           | H                                                                      | 7.376359  | -0.189207 | -1.625556 |
|   |           |           |           | H                                                                      | 7.153669  | -1.337670 | -0.474347 |
|   |           |           |           | H                                                                      | 2.609195  | -2.308753 | -1.967935 |
|   |           |           |           | H                                                                      | 2.796174  | -0.572019 | -2.060391 |
|   |           |           |           | H                                                                      | 0.422382  | -2.074141 | -1.235201 |
|   |           |           |           | H                                                                      | 0.460595  | 1.893080  | -0.710090 |
|   |           |           |           | H                                                                      | -1.460140 | -1.003976 | -0.741551 |
|   |           |           |           | H                                                                      | -1.531625 | 0.724785  | -0.765214 |
|   |           |           |           | H                                                                      | 6.626675  | 1.142452  | 0.281231  |
|   |           |           |           | H                                                                      | 1.981331  | 1.145003  | -1.076776 |
|   |           |           |           | C                                                                      | -0.940707 | -0.068023 | 3.188069  |
|   |           |           |           | C                                                                      | -0.069429 | -1.300418 | 3.003319  |
|   |           |           |           | O                                                                      | -0.326158 | -2.034710 | 1.808725  |
|   |           |           |           | C                                                                      | -1.367236 | -2.994032 | 1.920494  |
|   |           |           |           | C                                                                      | -1.483221 | -3.734966 | 0.600876  |
|   |           |           |           | O                                                                      | -2.027283 | -2.928329 | -0.451535 |
|   |           |           |           | C                                                                      | -3.436722 | -3.107632 | -0.635631 |
|   |           |           |           | C                                                                      | -3.963975 | -2.097220 | -1.627075 |
|   |           |           |           | O                                                                      | -3.948041 | -0.808295 | -1.031827 |
|   |           |           |           | C                                                                      | -4.489441 | 0.200410  | -1.874510 |
|   |           |           |           | C                                                                      | -4.498747 | 1.526486  | -1.148936 |
|   |           |           |           | O                                                                      | -3.169369 | 2.026736  | -1.021753 |
|   |           |           |           | C                                                                      | -3.113477 | 3.328105  | -0.453180 |
|   |           |           |           | C                                                                      | -1.683120 | 3.833480  | -0.521403 |
|   |           |           |           | O                                                                      | -0.747666 | 3.018342  | 0.185780  |
|   |           |           |           | C                                                                      | -0.615252 | 3.245744  | 1.595956  |
|   |           |           |           | C                                                                      | -1.241714 | 2.160040  | 2.452918  |
|   |           |           |           | O                                                                      | -0.504842 | 0.958111  | 2.308648  |
|   |           |           |           | H                                                                      | -0.849562 | 0.270241  | 4.231700  |
|   |           |           |           | H                                                                      | -1.999658 | -0.304033 | 3.008087  |
|   |           |           |           | H                                                                      | -0.184565 | -1.955316 | 3.877388  |
|   |           |           |           | H                                                                      | 0.975070  | -0.985375 | 2.951599  |
|   |           |           |           | H                                                                      | -2.324895 | -2.519339 | 2.174895  |

H -1.129908 -3.719320 2.713488  
H -2.092106 -4.635806 0.734721  
H -0.487104 -4.052063 0.280717  
H -3.628239 -4.119632 -1.014745  
H -3.963822 -2.985695 0.317978  
H -3.354829 -2.108977 -2.542014  
H -4.990864 -2.380073 -1.900029  
H -3.901859 0.284744 -2.798864  
H -5.523754 -0.053267 -2.148004  
H -5.105289 2.236608 -1.727436  
H -4.957528 1.408305 -0.158290  
H -3.750176 4.020423 -1.023194  
H -3.485663 3.309826 0.580803  
H -1.350940 3.831539 -1.561982  
H -1.642942 4.865602 -0.153164  
H -1.058537 4.212511 1.858455  
H 0.455767 3.293220 1.809440  
H -2.293757 1.998753 2.178689  
H -1.215650 2.499218 3.500537

H<sup>+</sup>R[N<sub>ω</sub>]-tgggtg(-00/+00/-00/+0+/-0+/-00) 1518

C 2.917791 -1.621357 -1.017766  
C 4.302547 -1.278531 -1.600169  
C 4.691354 0.211723 -1.488424  
H 5.710058 0.315658 -1.889865  
C 4.789997 0.668402 -0.037085  
O 4.214636 1.621909 0.428231  
O 5.630851 -0.107090 0.672110  
N 3.732805 1.089225 -2.180775  
C 1.767614 -1.548065 -2.047531  
N 0.461031 -1.261504 -1.461570  
C 0.033074 -0.019615 -1.178797  
N -1.180664 0.158610 -0.672499  
N 0.791543 1.051145 -1.459813  
H 2.945948 -2.630491 -0.597810  
H 2.682816 -0.960902 -0.178600  
H 4.356637 -1.567335 -2.656215  
H 5.076500 -1.855593 -1.091749  
H 3.870235 1.017947 -3.185245  
H 3.914740 2.056546 -1.923658  
H 1.969237 -0.786586 -2.801161  
H 1.681262 -2.495089 -2.584957  
H -0.023758 -2.002152 -0.958777  
H -1.434372 1.053378 -0.263576  
H 0.393204 1.960177 -1.278354  
H 1.794842 0.992411 -1.665640  
H 5.693082 0.256912 1.568717  
H -1.835278 -0.610081 -0.566072  
C -3.565565 2.539210 -1.349418  
C -2.916640 3.498526 -0.375894  
O -1.640213 3.001289 0.041920  
C -1.180397 3.623088 1.245338

C 0.111901 2.991394 1.711300  
O -0.126451 1.636487 2.048416  
C 0.969654 1.018140 2.709612  
C 0.626042 -0.420075 3.031165  
O 0.772652 -1.231767 1.867478  
C 0.478295 -2.606237 2.078769  
C -0.960159 -2.989519 1.765350  
O -1.162408 -2.982182 0.347453  
C -2.361351 -3.622019 -0.094425  
C -3.629815 -2.813066 0.123773  
O -3.543703 -1.601154 -0.615104  
C -4.779516 -0.884120 -0.680209  
C -4.592607 0.397447 -1.462778  
O -3.903637 1.345220 -0.660330  
H -2.888978 2.319707 -2.187847  
H -4.466112 3.018678 -1.759602  
H -3.568278 3.614286 0.497920  
H -2.795300 4.480133 -0.852187  
H -1.942808 3.510158 2.025477  
H -1.014101 4.695080 1.072711  
H 0.463862 3.554567 2.588450  
H 0.890918 3.067154 0.938831  
H 1.179980 1.547796 3.650488  
H 1.872633 1.058859 2.086171  
H -0.399209 -0.465682 3.420477  
H 1.307127 -0.780461 3.815226  
H 0.698364 -2.891967 3.115830  
H 1.145199 -3.179696 1.428875  
H -1.657809 -2.301789 2.257480  
H -1.145608 -4.002127 2.149231  
H -2.469179 -4.596332 0.399780  
H -2.225954 -3.794580 -1.164140  
H -3.799548 -2.597269 1.187399  
H -4.477647 -3.416083 -0.231238  
H -5.137988 -0.652106 0.330630  
H -5.532333 -1.505252 -1.183184  
H -5.580853 0.787561 -1.745290  
H -4.031663 0.188580 -2.384194

H<sup>+</sup>R[N<sub>ω</sub>]-tcgg.gt(+0+/-0+/-00/-00/+0+/-0+) 1260

C 3.176215 -2.501572 -1.221328  
C 4.252791 -1.732214 -0.429733  
C 4.464181 -0.234487 -0.751840  
H 5.436890 0.041649 -0.313513  
C 3.481102 0.730866 -0.084690  
O 3.140277 1.777212 -0.603477  
O 3.076404 0.337529 1.116015  
N 4.414154 0.023635 -2.198986  
C 1.730881 -2.013822 -1.092253  
N 1.571353 -0.724041 -1.774210  
C 0.533254 0.099343 -1.611833  
N -0.562806 -0.272474 -0.964857

|   |           |           |           |                                                                 |           |           |           |
|---|-----------|-----------|-----------|-----------------------------------------------------------------|-----------|-----------|-----------|
| N | 0.594088  | 1.343166  | -2.154100 | H                                                               | 0.284834  | 1.269606  | 4.165265  |
| H | 3.198797  | -3.537051 | -0.869868 | H                                                               | 0.870134  | 3.364037  | 2.951976  |
| H | 3.440557  | -2.542705 | -2.282707 | H                                                               | -0.742436 | 2.717837  | 2.593152  |
| H | 4.062470  | -1.820886 | 0.641374  | H                                                               | 1.335732  | 3.252569  | 0.419295  |
| H | 5.205975  | -2.239157 | -0.612288 | H                                                               | 0.248739  | 4.523663  | 1.012411  |
| H | 5.124342  | -0.516751 | -2.683540 |                                                                 |           |           |           |
| H | 4.596661  | 1.005766  | -2.383410 | H <sup>+</sup> R[N $\omega$ ]-tg.tggg.(+0+/+00/-00/+00/-00/+00) | 10789     |           |           |
| H | 1.455507  | -1.898694 | -0.039464 | C                                                               | -2.863778 | -2.081406 | -1.496577 |
| H | 1.059133  | -2.754301 | -1.538360 | C                                                               | -3.567125 | -1.030659 | -0.622254 |
| H | 2.398760  | -0.370248 | -2.264279 | C                                                               | -4.405926 | 0.015927  | -1.393513 |
| H | -1.345315 | 0.368882  | -0.869097 | H                                                               | -5.091025 | -0.525765 | -2.055493 |
| H | 0.022263  | 2.033441  | -1.670499 | C                                                               | -5.283628 | 0.799570  | -0.417379 |
| H | 1.532981  | 1.682358  | -2.320589 | O                                                               | -5.193955 | 1.987882  | -0.228358 |
| H | 2.354607  | 0.930947  | 1.444821  | O                                                               | -6.167854 | 0.010790  | 0.216218  |
| H | -0.695944 | -1.202746 | -0.576847 | N                                                               | -3.587024 | 0.970123  | -2.171365 |
| C | -1.910882 | 3.548999  | 0.080213  | C                                                               | -1.583329 | -1.650820 | -2.229787 |
| C | -2.819498 | 3.024084  | -1.008507 | N                                                               | -0.500786 | -1.235656 | -1.337008 |
| O | -3.061034 | 1.635857  | -0.800108 | C                                                               | -0.005435 | 0.006080  | -1.214585 |
| C | -4.058314 | 1.098837  | -1.672238 | N                                                               | -0.676435 | 1.058717  | -1.713929 |
| C | -4.553677 | -0.219688 | -1.122810 | N                                                               | 1.171847  | 0.180221  | -0.632749 |
| O | -3.490249 | -1.157620 | -1.125817 | H                                                               | -3.562928 | -2.470058 | -2.246678 |
| C | -3.845114 | -2.424679 | -0.600559 | H                                                               | -2.612321 | -2.937316 | -0.861028 |
| C | -2.610323 | -3.310383 | -0.587830 | H                                                               | -2.837862 | -0.516134 | 0.012764  |
| O | -1.541627 | -2.823386 | 0.227600  | H                                                               | -4.247007 | -1.559131 | 0.049857  |
| C | -1.768576 | -2.919347 | 1.633309  | H                                                               | -3.819498 | 0.912649  | -3.157779 |
| C | -0.452421 | -2.750068 | 2.375690  | H                                                               | -3.839742 | 1.912539  | -1.872233 |
| O | 0.139905  | -1.462607 | 2.264994  | H                                                               | -1.777260 | -0.842343 | -2.932321 |
| C | -0.419936 | -0.458870 | 3.102227  | H                                                               | -1.220239 | -2.497996 | -2.819673 |
| C | 0.608100  | 0.635028  | 3.333870  | H                                                               | -0.037333 | -1.942607 | -0.769396 |
| O | 0.837971  | 1.443248  | 2.165924  | H                                                               | -0.234437 | 1.962842  | -1.664129 |
| C | 0.291913  | 2.766513  | 2.234431  | H                                                               | 1.486483  | 1.097341  | -0.323874 |
| C | 0.360815  | 3.440846  | 0.872901  | H                                                               | 1.763584  | -0.615821 | -0.407403 |
| O | -0.613563 | 2.975868  | -0.066916 | H                                                               | -6.694998 | 0.563954  | 0.814170  |
| H | -2.337816 | 3.301662  | 1.059310  | H                                                               | -1.691235 | 1.016105  | -1.891258 |
| H | -1.848121 | 4.642463  | -0.005428 | C                                                               | 3.705613  | 2.956321  | -0.574922 |
| H | -2.370362 | 3.194870  | -1.996861 | C                                                               | 4.031518  | 1.889742  | -1.596995 |
| H | -3.766083 | 3.579633  | -0.967630 | O                                                               | 4.118618  | 0.629571  | -0.948959 |
| H | -3.645678 | 0.963808  | -2.680196 | C                                                               | 4.280711  | -0.456579 | -1.845580 |
| H | -4.909142 | 1.789416  | -1.737174 | C                                                               | 4.329609  | -1.754411 | -1.068389 |
| H | -5.383698 | -0.573299 | -1.751678 | O                                                               | 3.081186  | -1.973381 | -0.408190 |
| H | -4.933797 | -0.077299 | -0.101399 | C                                                               | 2.972954  | -3.240675 | 0.234731  |
| H | -4.609989 | -2.907391 | -1.227210 | C                                                               | 1.976095  | -3.159176 | 1.369810  |
| H | -4.269407 | -2.315306 | 0.407858  | O                                                               | 0.668105  | -2.885809 | 0.866626  |
| H | -2.201487 | -3.375112 | -1.597800 | C                                                               | -0.367464 | -2.967588 | 1.849343  |
| H | -2.894543 | -4.320484 | -0.265042 | C                                                               | -0.376501 | -1.858609 | 2.890023  |
| H | -2.170786 | -3.912962 | 1.875815  | O                                                               | -0.615474 | -0.606630 | 2.272590  |
| H | -2.501955 | -2.171724 | 1.960008  | C                                                               | -0.669235 | 0.459957  | 3.213094  |
| H | 0.278930  | -3.451072 | 1.967681  | C                                                               | -0.735871 | 1.794290  | 2.503169  |
| H | -0.614369 | -3.003475 | 3.432933  | O                                                               | 0.535693  | 2.107851  | 1.953863  |
| H | -0.680946 | -0.888897 | 4.080407  | C                                                               | 0.622631  | 3.420780  | 1.429857  |
| H | -1.332573 | -0.036812 | 2.660744  | C                                                               | 2.039943  | 3.673414  | 0.966852  |
| H | 1.561882  | 0.176638  | 3.607052  | O                                                               | 2.344868  | 2.836622  | -0.149278 |

|                                                                         |           |           |           |                                                                         |           |           |           |
|-------------------------------------------------------------------------|-----------|-----------|-----------|-------------------------------------------------------------------------|-----------|-----------|-----------|
| H                                                                       | 3.866058  | 3.947240  | -1.020111 | H                                                                       | -1.435669 | 0.344275  | -0.679142 |
| H                                                                       | 4.374434  | 2.850085  | 0.287696  | C                                                                       | 0.441786  | 2.651682  | 2.401893  |
| H                                                                       | 4.988249  | 2.141148  | -2.076960 | C                                                                       | 0.367121  | 3.403290  | 1.080576  |
| H                                                                       | 3.257909  | 1.868003  | -2.377906 | O                                                                       | -0.664229 | 2.973181  | 0.190003  |
| H                                                                       | 5.218284  | -0.357307 | -2.412089 | C                                                                       | -1.991425 | 3.294541  | 0.595332  |
| H                                                                       | 3.450523  | -0.481936 | -2.565803 | C                                                                       | -2.939908 | 3.063945  | -0.561037 |
| H                                                                       | 5.135276  | -1.719820 | -0.324636 | O                                                                       | -2.888475 | 1.695482  | -0.952423 |
| H                                                                       | 4.535960  | -2.573571 | -1.770033 | C                                                                       | -4.029429 | 1.269565  | -1.698961 |
| H                                                                       | 3.940888  | -3.531143 | 0.662645  | C                                                                       | -3.837131 | -0.167552 | -2.131212 |
| H                                                                       | 2.675360  | -4.005929 | -0.493574 | O                                                                       | -3.688138 | -0.971171 | -0.973719 |
| H                                                                       | 2.290197  | -2.374449 | 2.066861  | C                                                                       | -3.478234 | -2.347301 | -1.245802 |
| H                                                                       | 1.973689  | -4.120335 | 1.902484  | C                                                                       | -3.195181 | -3.057425 | 0.058099  |
| H                                                                       | -0.305255 | -3.933426 | 2.368761  | O                                                                       | -1.889164 | -2.719493 | 0.534670  |
| H                                                                       | -1.304566 | -2.944329 | 1.290384  | C                                                                       | -1.704156 | -3.074786 | 1.900729  |
| H                                                                       | 0.567576  | -1.830215 | 3.452197  | C                                                                       | -0.248406 | -2.899311 | 2.297310  |
| H                                                                       | -1.173718 | -2.094741 | 3.612656  | O                                                                       | 0.259038  | -1.575672 | 2.174202  |
| H                                                                       | 0.218491  | 0.442690  | 3.859479  | C                                                                       | -0.212940 | -0.647544 | 3.143609  |
| H                                                                       | -1.558589 | 0.351450  | 3.851319  | C                                                                       | 0.817146  | 0.450710  | 3.342998  |
| H                                                                       | -1.028427 | 2.560657  | 3.235661  | O                                                                       | 0.933358  | 1.320146  | 2.201270  |
| H                                                                       | -1.502657 | 1.768576  | 1.716011  | H                                                                       | 1.120887  | 3.199418  | 3.069001  |
| H                                                                       | 0.370758  | 4.164209  | 2.200500  | H                                                                       | -0.539786 | 2.609952  | 2.886556  |
| H                                                                       | -0.082919 | 3.556921  | 0.595916  | H                                                                       | 1.302917  | 3.279904  | 0.532950  |
| H                                                                       | 2.736007  | 3.462598  | 1.787992  | H                                                                       | 0.234770  | 4.470355  | 1.305706  |
| H                                                                       | 2.144886  | 4.729407  | 0.682895  | H                                                                       | -2.052304 | 4.349545  | 0.896735  |
| H <sup>+</sup> R[N <sub>ω</sub> ]-tcgg.gt(+0+/+00/-00/+00/+0+/+0+) 3896 |           |           |           | H                                                                       | -2.298295 | 2.671728  | 1.444126  |
| C                                                                       | 3.105771  | -2.443299 | -1.404055 | H                                                                       | -2.678800 | 3.707557  | -1.411508 |
| C                                                                       | 4.235274  | -1.668860 | -0.694826 | H                                                                       | -3.952971 | 3.327173  | -0.229897 |
| C                                                                       | 4.386442  | -0.159776 | -0.996774 | H                                                                       | -4.159450 | 1.897064  | -2.590700 |
| H                                                                       | 5.386350  | 0.130080  | -0.635532 | H                                                                       | -4.927081 | 1.358771  | -1.074394 |
| C                                                                       | 3.439242  | 0.765887  | -0.228234 | H                                                                       | -2.950114 | -0.256250 | -2.774173 |
| O                                                                       | 3.038955  | 1.817865  | -0.689179 | H                                                                       | -4.713963 | -0.478338 | -2.717648 |
| O                                                                       | 3.132681  | 0.329570  | 0.987016  | H                                                                       | -2.638404 | -2.481156 | -1.942364 |
| N                                                                       | 4.207651  | 0.129654  | -2.428334 | H                                                                       | -4.373033 | -2.790531 | -1.705943 |
| C                                                                       | 1.669781  | -1.982588 | -1.139172 | H                                                                       | -3.262686 | -4.143336 | -0.089758 |
| N                                                                       | 1.435308  | -0.682160 | -1.775943 | H                                                                       | -3.950278 | -2.760544 | 0.796338  |
| C                                                                       | 0.388886  | 0.110126  | -1.535575 | H                                                                       | -1.968749 | -4.130275 | 2.059255  |
| N                                                                       | -0.661196 | -0.297064 | -0.832422 | H                                                                       | -2.368036 | -2.469810 | 2.533770  |
| N                                                                       | 0.378914  | 1.358797  | -2.065061 | H                                                                       | 0.379828  | -3.514890 | 1.649849  |
| H                                                                       | 3.276090  | -2.458367 | -2.485219 | H                                                                       | -0.125840 | -3.259118 | 3.328733  |
| H                                                                       | 3.176559  | -3.484830 | -1.077858 | H                                                                       | -0.354734 | -1.151419 | 4.110761  |
| H                                                                       | 4.146356  | -1.786124 | 0.386632  | H                                                                       | -1.176266 | -0.219012 | 2.837891  |
| H                                                                       | 5.177340  | -2.150295 | -0.976846 | H                                                                       | 1.797378  | -0.002736 | 3.512221  |
| H                                                                       | 4.886575  | -0.381139 | -2.984595 | H                                                                       | 0.555248  | 1.035815  | 4.230252  |
| H                                                                       | 4.351233  | 1.120162  | -2.602552 | H <sup>+</sup> R[N <sub>ω</sub> ]-tcgg.gt(--0/-00/+00/--0/-00/+00) 4080 |           |           |           |
| H                                                                       | 0.972844  | -2.723760 | -1.545259 | C                                                                       | -4.189902 | -0.744449 | -2.389088 |
| H                                                                       | 1.487616  | -1.893819 | -0.063761 | C                                                                       | -4.860259 | -0.347401 | -1.060253 |
| H                                                                       | 2.215496  | -0.303586 | -2.323109 | C                                                                       | -4.059697 | -0.587625 | 0.231501  |
| H                                                                       | -0.724042 | -1.203572 | -0.382989 | H                                                                       | -4.775089 | -0.539135 | 1.068051  |
| H                                                                       | 1.293559  | 1.738739  | -2.273174 | C                                                                       | -3.062672 | 0.537555  | 0.541618  |
| H                                                                       | -0.211303 | 2.019990  | -1.565996 | O                                                                       | -3.106508 | 1.653124  | 0.074294  |
| H                                                                       | 2.415984  | 0.890685  | 1.379868  | O                                                                       | -2.155195 | 0.143327  | 1.440944  |

N -3.352723 -1.883615 0.193765  
 C -2.878395 -0.032223 -2.726269  
 N -1.767614 -0.534016 -1.904960  
 C -0.637943 0.148921 -1.682015  
 N -0.386490 1.293730 -2.358363  
 N 0.263463 -0.274733 -0.806683  
 H -4.894912 -0.511412 -3.191796  
 H -4.031907 -1.826302 -2.436206  
 H -5.139126 0.708469 -1.086520  
 H -5.795149 -0.911585 -0.983774  
 H -4.018973 -2.639030 0.058612  
 H -2.883638 -2.052124 1.077740  
 H -2.642900 -0.185458 -3.784411  
 H -3.008850 1.040947 -2.551197  
 H -1.990396 -1.314841 -1.281182  
 H 0.211981 1.960190 -1.870574  
 H 0.201097 -1.171006 -0.329960  
 H 1.171002 0.180721 -0.765719  
 H -1.483740 0.847538 1.619670  
 H -1.139733 1.700374 -2.888904  
 C 0.045982 3.506390 0.565275  
 C 0.256696 3.112631 2.018898  
 O -0.039958 1.730639 2.227594  
 C 0.538827 1.218190 3.435037  
 C 0.172221 -0.235176 3.635510  
 O 0.799930 -1.028981 2.642652  
 C 0.434416 -2.396995 2.714918  
 C 1.261396 -3.198088 1.735712  
 O 0.877557 -2.895009 0.394397  
 C 1.640303 -3.584390 -0.599812  
 C 3.025938 -3.003475 -0.834342  
 O 2.894943 -1.696700 -1.368449  
 C 4.122835 -0.992912 -1.455833  
 C 3.873316 0.390445 -2.013664  
 O 3.075495 1.143504 -1.098430  
 C 3.075163 2.539721 -1.372092  
 C 2.303631 3.259793 -0.287883  
 O 0.931278 2.879223 -0.367159  
 H -0.960978 3.227904 0.248423  
 H 0.141399 4.598429 0.491779  
 H -0.400068 3.736631 2.640607  
 H 1.288024 3.309670 2.333292  
 H 0.176279 1.794891 4.296350  
 H 1.629099 1.319667 3.380054  
 H -0.917418 -0.364008 3.602277  
 H 0.513859 -0.534785 4.637766  
 H -0.636422 -2.519162 2.499047  
 H 0.623118 -2.792584 3.724048  
 H 1.102264 -4.268203 1.927687  
 H 2.320828 -2.971359 1.898236  
 H 1.060279 -3.515863 -1.522186  
 H 1.732674 -4.645125 -0.332328

H 3.563048 -3.657507 -1.537850  
 H 3.607569 -2.976317 0.097367  
 H 4.823719 -1.516296 -2.122870  
 H 4.587490 -0.914480 -0.463097  
 H 3.370191 0.326056 -2.987223  
 H 4.842850 0.885383 -2.158272  
 H 2.631572 2.740770 -2.357730  
 H 4.104456 2.923654 -1.382329  
 H 2.403922 4.344528 -0.430217  
 H 2.724661 2.992724 0.686980

H<sup>+</sup>R[N<sub>ω</sub>]-tg.tggg.(-0/-00/+00/-00/+00/--0) 590

C 3.362743 -2.233014 0.326773  
 C 4.103640 -1.245548 -0.588781  
 C 4.916073 -0.155516 0.154643  
 H 5.381150 -0.613651 1.032382  
 C 6.049604 0.339935 -0.747529  
 O 6.065477 1.420157 -1.282351  
 O 7.018799 -0.581458 -0.893291  
 N 4.077956 0.978963 0.586130  
 C 2.141315 -1.707658 1.095000  
 N 0.993515 -1.404916 0.235418  
 C 0.441368 -0.190204 0.026056  
 N -0.782201 -0.133504 -0.488725  
 N 1.122003 0.926197 0.279337  
 H 4.068369 -2.637897 1.061621  
 H 3.041635 -3.088037 -0.278381  
 H 3.408189 -0.756073 -1.278899  
 H 4.794194 -1.827796 -1.203381  
 H 4.185928 1.718277 -0.110258  
 H 4.448598 1.371063 1.447663  
 H 1.825199 -2.470889 1.812825  
 H 2.383146 -0.816987 1.673093  
 H 0.434250 -2.184874 -0.081931  
 H -1.406587 -0.933009 -0.427861  
 H 0.587915 1.787106 0.363288  
 H 2.127153 0.912530 0.485982  
 H 7.693970 -0.223456 -1.491405  
 H -1.180081 0.746813 -0.802322  
 C -3.094991 1.618987 -2.888013  
 C -2.664341 0.278952 -3.442806  
 O -2.910095 -0.733099 -2.476842  
 C -2.419490 -2.010314 -2.851500  
 C -2.839099 -3.020854 -1.806927  
 O -2.176364 -2.761109 -0.563997  
 C -2.837926 -3.372828 0.545584  
 C -2.198973 -2.943884 1.847443  
 O -2.359336 -1.547229 2.009825  
 C -2.051152 -1.088134 3.319252  
 C -2.198996 0.416326 3.384893  
 O -1.066092 1.037201 2.787021  
 C -1.060724 2.454882 2.877259



C -1.733479 3.158250 1.707825  
 O -0.909356 3.043226 0.543380  
 C -1.300041 3.863448 -0.558658  
 C -2.484700 3.334466 -1.350717  
 O -2.142732 2.078565 -1.925505  
 H -4.086953 1.527547 -2.427647  
 H -3.158176 2.343775 -3.710410  
 H -3.235856 0.073879 -4.359301  
 H -1.598127 0.313234 -3.706208  
 H -2.839895 -2.320235 -3.819216  
 H -1.324740 -1.986365 -2.952548  
 H -3.923785 -2.955230 -1.663750  
 H -2.594976 -4.033159 -2.154574  
 H -2.782347 -4.466729 0.460574  
 H -3.894063 -3.077748 0.546845  
 H -2.694659 -3.492645 2.661864  
 H -1.132240 -3.215355 1.868724  
 H -1.025388 -1.365974 3.598754  
 H -2.739434 -1.545878 4.044490  
 H -3.129215 0.709380 2.880907  
 H -2.270134 0.716714 4.440028  
 H -1.543555 2.782444 3.807743  
 H -0.012689 2.763120 2.919681  
 H -2.726723 2.733807 1.519776  
 H -1.856135 4.220871 1.958956  
 H -0.427072 3.916410 -1.212616  
 H -1.528203 4.878429 -0.208247  
 H -3.381694 3.232209 -0.724954  
 H -2.713276 4.063401 -2.141136

H<sup>+</sup>R[N<sub>ω</sub>]-tgtg.g.g(+00/-00/+00/-00/+0+/-0+) 2041

C -3.362750 -2.233246 0.325786  
 C -4.103481 -1.245636 -0.589746  
 C -4.916113 -0.155775 0.153711  
 H -5.381402 -0.614112 1.031233  
 C -6.049426 0.339859 -0.748631  
 O -6.065196 1.420210 -1.283195  
 O -7.018556 -0.581528 -0.894862  
 N -4.078120 0.978625 0.585654  
 C -2.141498 -1.708003 1.094375  
 N -0.993495 -1.405128 0.235113  
 C -0.441393 -0.190367 0.025930  
 N 0.782268 -0.133556 -0.488626  
 N -1.122141 0.925976 0.279159  
 H -3.041488 -3.088151 -0.279453  
 H -4.068524 -2.638282 1.060410  
 H -3.407901 -0.756008 -1.279625  
 H -4.793885 -1.827793 -1.204600  
 H -4.448906 1.370458 1.447245  
 H -4.186019 1.718133 -0.110539  
 H -1.825544 -2.471347 1.812150  
 H -2.383462 -0.817425 1.672555

H -0.434129 -2.185029 -0.082193  
 H 1.406709 -0.933013 -0.427662  
 H -0.588118 1.786913 0.363252  
 H -2.127314 0.912239 0.485692  
 H -7.693588 -0.223402 -1.493059  
 H 1.180153 0.746810 -0.802077  
 C 2.420335 -2.010185 -2.851027  
 C 2.839806 -3.020680 -1.806356  
 O 2.176753 -2.760998 -0.563582  
 C 2.838115 -3.372652 0.546155  
 C 2.198834 -2.943757 1.847870  
 O 2.359067 -1.547092 2.010301  
 C 2.050566 -1.088031 3.319665  
 C 2.198274 0.416440 3.385347  
 O 1.065445 1.037228 2.787241  
 C 1.059946 2.454907 2.877486  
 C 1.732856 3.158327 1.708174  
 O 0.908963 3.043202 0.543576  
 C 1.299763 3.863455 -0.558398  
 C 2.484644 3.334610 -1.350216  
 O 2.142943 2.078664 -1.925063  
 C 3.095461 1.619187 -2.887362  
 C 2.665070 0.279113 -3.442259  
 O 2.910706 -0.732917 -2.476244  
 H 1.325607 -1.986360 -2.952339  
 H 2.841008 -2.320056 -3.818643  
 H 3.924451 -2.954945 -1.662925  
 H 2.595867 -4.033012 -2.154056  
 H 3.894226 -3.077483 0.547653  
 H 2.782648 -4.466558 0.461139  
 H 2.694371 -3.492490 2.662400  
 H 1.132115 -3.215298 1.868904  
 H 2.738729 -1.545725 4.045047  
 H 1.024764 -1.365955 3.598947  
 H 3.128574 0.709574 2.881558  
 H 2.269165 0.716827 4.440498  
 H 1.542581 2.782506 3.808058  
 H 0.011879 2.763062 2.919718  
 H 2.726178 2.733979 1.520318  
 H 1.855358 4.220964 1.959312  
 H 1.527729 4.878470 -0.207957  
 H 0.426916 3.916297 -1.212529  
 H 3.381526 3.232469 -0.724274  
 H 2.713289 4.063568 -2.140595  
 H 4.087330 1.527846 -2.426777  
 H 3.158755 2.343986 -3.709742  
 H 3.236813 0.074101 -4.358626  
 H 1.598912 0.313290 -3.705903

H<sup>+</sup>R[N<sub>ω</sub>]-cgggtg(+00/-00/+0+/-0+/-00/-00) 2529

C 3.117576 -1.420853 -0.020309  
 C 4.582992 -1.517599 -0.469527

|   |           |           |           |                                                                         |           |           |           |
|---|-----------|-----------|-----------|-------------------------------------------------------------------------|-----------|-----------|-----------|
| C | 5.112368  | -0.395389 | -1.396562 | H                                                                       | -4.285769 | -3.304652 | -1.649049 |
| H | 4.596470  | -0.445399 | -2.360376 | H                                                                       | -5.283609 | -1.307808 | -2.560859 |
| C | 4.796861  | 0.994996  | -0.812912 | H                                                                       | -5.303186 | -1.206372 | -0.782825 |
| O | 3.681118  | 1.471736  | -0.819043 | H                                                                       | -5.411814 | 1.253264  | -2.425406 |
| O | 5.834455  | 1.622709  | -0.281211 | H                                                                       | -5.285575 | 1.122347  | -0.653772 |
| N | 6.569247  | -0.522626 | -1.548633 | H                                                                       | -3.201907 | 2.432958  | -2.479338 |
| C | 2.100909  | -1.500538 | -1.171261 | H                                                                       | -4.468144 | 3.284063  | -1.563151 |
| N | 0.719389  | -1.256314 | -0.765134 | H                                                                       | -1.806893 | 4.031464  | -0.889375 |
| C | 0.127462  | -0.041821 | -0.753491 | H                                                                       | -3.259622 | 4.385462  | 0.073642  |
| N | 0.807474  | 1.062996  | -1.100239 | H                                                                       | -1.377782 | 4.545076  | 1.548062  |
| N | -1.161352 | 0.034409  | -0.459519 | H                                                                       | -2.275712 | 3.066336  | 1.972189  |
| H | 2.953087  | -0.502605 | 0.545701  | H                                                                       | 0.255603  | 3.411377  | 2.786215  |
| H | 2.927968  | -2.249560 | 0.669851  | H                                                                       | 1.368699  | 2.492874  | 1.760213  |
| H | 4.747550  | -2.466543 | -0.993440 | H                                                                       | -1.079377 | 1.164522  | 2.993904  |
| H | 5.217430  | -1.541256 | 0.423404  | H                                                                       | 0.441688  | 1.363887  | 3.890606  |
| H | 6.885081  | -0.299446 | -2.486209 |                                                                         |           |           |           |
| H | 6.908547  | -1.448733 | -1.315301 |                                                                         |           |           |           |
| H | 2.342806  | -0.788724 | -1.961272 | H <sup>+</sup> R[N <sub>ω</sub> ]-tgtg.tg.(+00/-00/+00/-00/+0+/-0+) 309 |           |           |           |
| H | 2.135068  | -2.492495 | -1.631486 | C                                                                       | 3.092109  | -1.314189 | -1.354828 |
| H | 0.268008  | -1.939626 | -0.165028 | C                                                                       | 4.577035  | -1.121632 | -0.998214 |
| H | 1.823576  | 1.082112  | -1.040451 | C                                                                       | 4.979732  | 0.362305  | -0.842789 |
| H | -1.733526 | -0.800466 | -0.365122 | H                                                                       | 4.843666  | 0.848876  | -1.813215 |
| H | -1.645092 | 0.926303  | -0.403700 | C                                                                       | 6.465439  | 0.449069  | -0.484049 |
| H | 6.612925  | 1.043729  | -0.464865 | O                                                                       | 6.885071  | 0.737322  | 0.607887  |
| H | 0.359384  | 1.939381  | -0.861445 | O                                                                       | 7.252348  | 0.140790  | -1.532791 |
| C | 0.574856  | -1.055711 | 2.957548  | N                                                                       | 4.144381  | 1.069594  | 0.140566  |
| C | -0.692013 | -1.891755 | 2.852345  | C                                                                       | 2.195941  | -1.514910 | -0.117244 |
| O | -0.828376 | -2.463330 | 1.547788  | N                                                                       | 0.789409  | -1.201943 | -0.359721 |
| C | -1.905014 | -3.400651 | 1.469798  | C                                                                       | 0.298379  | 0.045643  | -0.327461 |
| C | -2.372251 | -3.543827 | 0.037410  | N                                                                       | -0.995858 | 0.252026  | -0.544699 |
| O | -2.987628 | -2.322932 | -0.357427 | N                                                                       | 1.106130  | 1.096862  | -0.109271 |
| C | -3.701010 | -2.377560 | -1.595417 | H                                                                       | 2.977332  | -2.177570 | -2.015288 |
| C | -4.651170 | -1.201326 | -1.667112 | H                                                                       | 2.738879  | -0.449507 | -1.923951 |
| O | -3.906508 | 0.004145  | -1.722557 | H                                                                       | 5.208926  | -1.551439 | -1.777506 |
| C | -4.705701 | 1.167888  | -1.586048 | H                                                                       | 4.819932  | -1.662720 | -0.075060 |
| C | -3.822486 | 2.396479  | -1.574917 | H                                                                       | 4.360423  | 2.063469  | 0.096955  |
| O | -2.993140 | 2.385737  | -0.410582 | H                                                                       | 4.440563  | 0.789578  | 1.075368  |
| C | -2.448793 | 3.660520  | -0.078462 | H                                                                       | 2.236170  | -2.556931 | 0.204563  |
| C | -1.653834 | 3.539800  | 1.201935  | H                                                                       | 2.561240  | -0.919975 | 0.723462  |
| O | -0.478513 | 2.770882  | 0.956005  | H                                                                       | 0.095826  | -1.936658 | -0.234939 |
| C | 0.336563  | 2.550321  | 2.112125  | H                                                                       | -1.626804 | -0.516917 | -0.747750 |
| C | 0.007431  | 1.278214  | 2.883754  | H                                                                       | 0.709387  | 2.017696  | -0.216985 |
| O | 0.577624  | 0.156153  | 2.215653  | H                                                                       | 2.124659  | 1.015865  | -0.013951 |
| H | 1.418573  | -1.643082 | 2.587475  | H                                                                       | 8.177585  | 0.183418  | -1.243095 |
| H | 0.756005  | -0.848846 | 4.021465  | H                                                                       | -1.417093 | 1.144881  | -0.300574 |
| H | -1.583198 | -1.292995 | 3.081462  | C                                                                       | -3.506229 | -2.758706 | -1.201390 |
| H | -0.624549 | -2.694740 | 3.599881  | C                                                                       | -2.284013 | -3.571845 | -0.809101 |
| H | -2.747447 | -3.052966 | 2.079023  | O                                                                       | -1.482052 | -2.978639 | 0.214869  |
| H | -1.579740 | -4.376812 | 1.853277  | C                                                                       | -2.000846 | -3.110515 | 1.543768  |
| H | -3.096360 | -4.367757 | -0.013509 | C                                                                       | -0.930962 | -2.711223 | 2.548286  |
| H | -1.533580 | -3.792110 | -0.628891 | O                                                                       | -0.647523 | -1.319377 | 2.570020  |
| H | -2.999610 | -2.359352 | -2.439235 | C                                                                       | -1.417006 | -0.580136 | 3.514587  |
|   |           |           |           | C                                                                       | -0.992273 | 0.872183  | 3.502594  |

|                                                                          |           |           |           |   |           |           |           |
|--------------------------------------------------------------------------|-----------|-----------|-----------|---|-----------|-----------|-----------|
| O                                                                        | -1.566947 | 1.535701  | 2.384838  | H | 4.740967  | 1.209454  | -1.551089 |
| C                                                                        | -1.210140 | 2.903201  | 2.298564  | H | 4.204561  | -2.399222 | -0.664574 |
| C                                                                        | -2.079438 | 3.585018  | 1.266115  | H | 4.261375  | -1.444823 | -1.957346 |
| O                                                                        | -1.835174 | 3.045437  | -0.035491 | H | 2.429022  | 0.362832  | -2.015781 |
| C                                                                        | -2.724466 | 3.577240  | -1.024447 | H | 2.157837  | 2.087151  | -1.956747 |
| C                                                                        | -2.787904 | 2.657973  | -2.224235 | H | 0.125726  | 1.754091  | -0.778933 |
| O                                                                        | -3.406226 | 1.442160  | -1.834062 | H | -1.722784 | 0.433548  | -0.692801 |
| C                                                                        | -3.603034 | 0.531708  | -2.906182 | H | 2.006203  | -1.304666 | -0.756507 |
| C                                                                        | -4.135216 | -0.776838 | -2.364803 | H | 0.539562  | -2.241797 | -0.635937 |
| O                                                                        | -3.083789 | -1.506686 | -1.727045 | H | 8.113109  | -0.350659 | -0.029987 |
| H                                                                        | -4.184474 | -2.604258 | -0.351237 | H | -1.530980 | -1.201976 | -0.142894 |
| H                                                                        | -4.056358 | -3.326063 | -1.965570 | C | -0.814522 | 0.479670  | 3.642048  |
| H                                                                        | -2.603158 | -4.575272 | -0.499530 | C | -0.558080 | -0.988905 | 3.384754  |
| H                                                                        | -1.628118 | -3.673336 | -1.676171 | O | -1.555507 | -1.505948 | 2.516354  |
| H                                                                        | -2.898354 | -2.493713 | 1.669214  | C | -1.486318 | -2.909456 | 2.341949  |
| H                                                                        | -2.276672 | -4.159180 | 1.719984  | C | -2.648275 | -3.358819 | 1.484554  |
| H                                                                        | -1.237640 | -3.058906 | 3.543695  | O | -2.502268 | -2.849963 | 0.158174  |
| H                                                                        | 0.002438  | -3.220916 | 2.293328  | C | -3.632778 | -3.134691 | -0.671789 |
| H                                                                        | -1.250103 | -0.987241 | 4.521807  | C | -3.532448 | -2.374886 | -1.975919 |
| H                                                                        | -2.490023 | -0.642998 | 3.291488  | O | -3.780627 | -0.997911 | -1.737916 |
| H                                                                        | -1.335329 | 1.348149  | 4.432760  | C | -3.559123 | -0.180664 | -2.874865 |
| H                                                                        | 0.104277  | 0.933836  | 3.471193  | C | -3.818883 | 1.267565  | -2.520951 |
| H                                                                        | -0.144473 | 3.009770  | 2.046001  | O | -2.886541 | 1.703749  | -1.529709 |
| H                                                                        | -1.373484 | 3.410064  | 3.261267  | C | -2.931413 | 3.104112  | -1.269306 |
| H                                                                        | -3.134575 | 3.439487  | 1.526777  | C | -2.394438 | 3.387708  | 0.115894  |
| H                                                                        | -1.864155 | 4.662183  | 1.271658  | O | -1.014210 | 3.030744  | 0.196864  |
| H                                                                        | -3.729355 | 3.675126  | -0.598058 | C | -0.379149 | 3.406409  | 1.422900  |
| H                                                                        | -2.381175 | 4.571584  | -1.338085 | C | -0.809910 | 2.620264  | 2.651103  |
| H                                                                        | -3.371009 | 3.156388  | -3.012088 | O | -0.468627 | 1.254613  | 2.500532  |
| H                                                                        | -1.780740 | 2.465201  | -2.621417 | H | -0.213768 | 0.798240  | 4.506773  |
| H                                                                        | -2.660375 | 0.354077  | -3.441917 | H | -1.874540 | 0.621198  | 3.892672  |
| H                                                                        | -4.330575 | 0.941195  | -3.621540 | H | -0.587221 | -1.518661 | 4.348228  |
| H                                                                        | -4.948130 | -0.581416 | -1.653988 | H | 0.442718  | -1.126596 | 2.951127  |
| H                                                                        | -4.535870 | -1.371323 | -3.196555 | H | -0.531996 | -3.198531 | 1.875200  |
| H <sup>+</sup> R[N <sub>ω</sub> ]-tgtg.tg.(+00/-00/+00/-00/+00/+0+) 9068 |           |           |           |   |           |           |           |
| C                                                                        | 3.073657  | 1.289811  | -0.151512 | H | -1.550462 | -3.425278 | 3.311489  |
| C                                                                        | 4.535019  | 0.955512  | -0.503744 | H | -3.586007 | -2.992660 | 1.919911  |
| C                                                                        | 4.897793  | -0.525387 | -0.253601 | H | -2.679224 | -4.456678 | 1.462761  |
| H                                                                        | 4.793180  | -0.718679 | 0.818175  | H | -4.554838 | -2.845830 | -0.153193 |
| C                                                                        | 6.364457  | -0.759089 | -0.625673 | H | -3.673749 | -4.211897 | -0.881016 |
| O                                                                        | 6.729857  | -1.355106 | -1.606475 | H | -4.272799 | -2.782352 | -2.679344 |
| O                                                                        | 7.202079  | -0.197415 | 0.267388  | H | -2.535620 | -2.515221 | -2.418356 |
| N                                                                        | 4.004514  | -1.448946 | -0.970291 | H | -4.236067 | -0.462460 | -3.694796 |
| C                                                                        | 2.117373  | 1.174982  | -1.357633 | H | -2.526198 | -0.299463 | -3.231948 |
| N                                                                        | 0.719945  | 0.956347  | -0.999168 | H | -3.712333 | 1.871486  | -3.431944 |
| C                                                                        | 0.197244  | -0.247541 | -0.720016 | H | -4.840633 | 1.387821  | -2.139943 |
| N                                                                        | -1.108738 | -0.360130 | -0.528433 | H | -2.355307 | 3.645048  | -2.031202 |
| N                                                                        | 0.983686  | -1.338250 | -0.667721 | H | -3.968309 | 3.462463  | -1.303664 |
| H                                                                        | 2.728103  | 0.630188  | 0.649520  | H | -2.511212 | 4.460021  | 0.325053  |
| H                                                                        | 3.017155  | 2.306255  | 0.247731  | H | -2.980334 | 2.823448  | 0.849693  |
| H                                                                        | 5.214596  | 1.564175  | 0.095487  | H | -0.549144 | 4.474849  | 1.612009  |
|                                                                          |           |           |           | H | 0.689192  | 3.257022  | 1.256516  |
|                                                                          |           |           |           | H | -1.888481 | 2.724884  | 2.835323  |

|                                                                           |           |           |           |                                                                           |           |           |           |
|---------------------------------------------------------------------------|-----------|-----------|-----------|---------------------------------------------------------------------------|-----------|-----------|-----------|
| H                                                                         | -0.291634 | 3.058447  | 3.518767  | H                                                                         | 1.099663  | -2.952053 | 3.481113  |
|                                                                           |           |           |           | H                                                                         | 0.132782  | -2.996386 | 1.988439  |
| H <sup>+</sup> R[N <sub>ω</sub> ]-tg.tgg.t(-00/+0+/-0+/-+00/-00/+00) 7969 |           |           |           | H                                                                         | 0.672678  | -0.420697 | 3.511572  |
| C                                                                         | -3.089440 | -2.176170 | -2.256542 | H                                                                         | -0.670978 | -1.506991 | 3.935247  |
| C                                                                         | -3.865996 | -1.604662 | -1.045714 | H                                                                         | -1.850569 | 0.411508  | 3.543322  |
| C                                                                         | -4.282097 | -0.121679 | -1.217829 | H                                                                         | -2.561310 | 0.425895  | 1.928244  |
| H                                                                         | -4.871715 | -0.045963 | -2.135006 | H                                                                         | 0.053095  | 1.852252  | 2.611875  |
| C                                                                         | -5.186010 | 0.277459  | -0.051813 | H                                                                         | -1.556791 | 2.604166  | 2.706564  |
| O                                                                         | -4.822301 | 0.922387  | 0.901830  | H                                                                         | -1.251088 | 4.119820  | 1.073787  |
| O                                                                         | -6.433459 | -0.203968 | -0.192326 | H                                                                         | -0.990364 | 3.556181  | -0.589600 |
| N                                                                         | -3.118522 | 0.767330  | -1.326117 | H                                                                         | 1.203337  | 3.653801  | 1.550992  |
| C                                                                         | -1.581048 | -2.349718 | -2.050499 | H                                                                         | 0.898856  | 4.892260  | 0.317565  |
| N                                                                         | -0.943870 | -1.070516 | -1.746980 | H                                                                         | 3.388104  | 3.296388  | 0.497524  |
| C                                                                         | 0.339487  | -0.922282 | -1.407908 | H                                                                         | 3.029062  | 4.421537  | -0.836318 |
| N                                                                         | 1.223602  | -1.908524 | -1.637045 | H                                                                         | 4.606496  | 2.836230  | -1.664772 |
| N                                                                         | 0.759102  | 0.219327  | -0.870385 | H                                                                         | 3.041199  | 2.439215  | -2.417037 |
| H                                                                         | -3.258350 | -1.552235 | -3.139983 | H                                                                         | 5.369884  | 0.735804  | -2.027882 |
| H                                                                         | -3.485465 | -3.163986 | -2.504108 | H                                                                         | 3.909827  | -0.144653 | -2.517890 |
| H                                                                         | -3.272277 | -1.702111 | -0.129839 | H                                                                         | 5.418714  | -0.465809 | 0.128130  |
| H                                                                         | -4.775938 | -2.188364 | -0.891562 | H                                                                         | 5.608253  | -1.544879 | -1.275535 |
| H                                                                         | -3.341995 | 1.576670  | -1.896500 |                                                                           |           |           |           |
| H                                                                         | -2.860740 | 1.127177  | -0.406863 | H <sup>+</sup> R[N <sub>ω</sub> ]-tg.tg.tg.(+00/-00/+00/-00/+0+/-0+) 6186 |           |           |           |
| H                                                                         | -1.159011 | -2.781396 | -2.966329 | C                                                                         | 3.016017  | -1.065737 | -1.690653 |
| H                                                                         | -1.396966 | -3.057449 | -1.233069 | C                                                                         | 4.523069  | -0.900702 | -1.450706 |
| H                                                                         | -1.578256 | -0.261103 | -1.650251 | C                                                                         | 4.881604  | 0.159277  | -0.379313 |
| H                                                                         | 0.977091  | -2.692674 | -2.215416 | H                                                                         | 4.683792  | -0.256495 | 0.613313  |
| H                                                                         | 1.747844  | 0.393860  | -0.713829 | C                                                                         | 6.381930  | 0.453435  | -0.436796 |
| H                                                                         | 0.111618  | 0.839692  | -0.391610 | O                                                                         | 6.861323  | 1.499383  | -0.791123 |
| H                                                                         | -6.950701 | 0.049535  | 0.588791  | O                                                                         | 7.110174  | -0.612488 | -0.047229 |
| H                                                                         | 2.158023  | -1.860119 | -1.231251 | N                                                                         | 4.070337  | 1.374187  | -0.525945 |
| C                                                                         | 4.023836  | -2.399730 | 0.886010  | C                                                                         | 2.209537  | -1.414780 | -0.428825 |
| C                                                                         | 2.735403  | -2.968425 | 1.437564  | N                                                                         | 0.779977  | -1.140313 | -0.573857 |
| O                                                                         | 1.907272  | -1.911914 | 1.884799  | C                                                                         | 0.249874  | 0.087992  | -0.460904 |
| C                                                                         | 0.773225  | -2.358838 | 2.614153  | N                                                                         | -1.065234 | 0.246636  | -0.557256 |
| C                                                                         | -0.021551 | -1.172553 | 3.113657  | N                                                                         | 1.029356  | 1.167588  | -0.276940 |
| O                                                                         | -0.823724 | -0.633535 | 2.067009  | H                                                                         | 2.618769  | -0.145544 | -2.123876 |
| C                                                                         | -1.616668 | 0.478753  | 2.472839  | H                                                                         | 2.860920  | -1.843911 | -2.443443 |
| C                                                                         | -0.965345 | 1.825528  | 2.206567  | H                                                                         | 4.980302  | -1.848385 | -1.155112 |
| O                                                                         | -0.950833 | 2.083247  | 0.795512  | H                                                                         | 4.989584  | -0.619585 | -2.401285 |
| C                                                                         | -0.661446 | 3.440451  | 0.445285  | H                                                                         | 4.287437  | 1.813077  | -1.419768 |
| C                                                                         | 0.808074  | 3.818010  | 0.538590  | H                                                                         | 4.366507  | 2.055372  | 0.169826  |
| O                                                                         | 1.533345  | 3.049419  | -0.405821 | H                                                                         | 2.305181  | -2.477564 | -0.200696 |
| C                                                                         | 2.910292  | 3.385440  | -0.487693 | H                                                                         | 2.587771  | -0.876695 | 0.445263  |
| C                                                                         | 3.594188  | 2.458787  | -1.468799 | H                                                                         | 0.124486  | -1.898544 | -0.394535 |
| O                                                                         | 3.670035  | 1.149308  | -0.904835 | H                                                                         | -1.684069 | -0.541020 | -0.723669 |
| C                                                                         | 4.467902  | 0.235851  | -1.651041 | H                                                                         | 2.054053  | 1.144662  | -0.325520 |
| C                                                                         | 4.905072  | -0.891889 | -0.741124 | H                                                                         | 0.583392  | 2.070473  | -0.337727 |
| O                                                                         | 3.772531  | -1.641511 | -0.300503 | H                                                                         | 8.049775  | -0.380735 | -0.118003 |
| H                                                                         | 4.718170  | -3.222060 | 0.666270  | H                                                                         | -1.495222 | 1.121835  | -0.268638 |
| H                                                                         | 4.481527  | -1.748843 | 1.639804  | C                                                                         | -3.520464 | -2.835351 | -0.983082 |
| H                                                                         | 2.995449  | -3.637580 | 2.271581  | C                                                                         | -2.247329 | -3.618544 | -0.709613 |
| H                                                                         | 2.218449  | -3.573425 | 0.677972  | O                                                                         | -1.359649 | -2.998530 | 0.223803  |

|                                                                           |           |           |           |   |           |           |           |
|---------------------------------------------------------------------------|-----------|-----------|-----------|---|-----------|-----------|-----------|
| C                                                                         | -1.732500 | -3.140242 | 1.599744  | N | -1.032154 | -0.128813 | -0.882905 |
| C                                                                         | -0.574645 | -2.710501 | 2.487680  | N | 1.013422  | 0.850012  | -1.325673 |
| O                                                                         | -0.332982 | -1.310158 | 2.490792  | H | 2.863819  | -0.650772 | 0.600360  |
| C                                                                         | -1.024216 | -0.602584 | 3.517232  | H | 2.737907  | -2.379251 | 0.845341  |
| C                                                                         | -0.663191 | 0.866110  | 3.467733  | H | 4.801892  | -2.788366 | -0.453260 |
| O                                                                         | -1.383415 | 1.507026  | 2.423732  | H | 5.069851  | -1.738217 | 0.928465  |
| C                                                                         | -1.095323 | 2.888534  | 2.308191  | H | 7.025760  | -1.840768 | -0.479585 |
| C                                                                         | -2.089833 | 3.532411  | 1.368565  | H | 7.237464  | -0.841771 | -1.764384 |
| O                                                                         | -1.949292 | 3.005754  | 0.046363  | H | 2.330475  | -2.764245 | -1.552491 |
| C                                                                         | -2.946488 | 3.508129  | -0.850964 | H | 2.640507  | -1.084926 | -1.934110 |
| C                                                                         | -3.080323 | 2.597961  | -2.051816 | H | 0.217032  | -2.204831 | -0.694451 |
| O                                                                         | -3.614026 | 1.355215  | -1.622849 | H | -1.581292 | -0.948530 | -0.651081 |
| C                                                                         | -3.862634 | 0.442308  | -2.681961 | H | 2.024789  | 0.850241  | -1.216989 |
| C                                                                         | -4.304566 | -0.885507 | -2.107086 | H | 0.550108  | 1.743155  | -1.195229 |
| O                                                                         | -3.181070 | -1.579684 | -1.558008 | H | 6.685723  | 0.729355  | 0.021893  |
| H                                                                         | -4.113779 | -2.686150 | -0.070747 | H | -1.496463 | 0.768227  | -0.797561 |
| H                                                                         | -4.131425 | -3.421924 | -1.683818 | C | -4.798451 | 0.233419  | -1.266479 |
| H                                                                         | -1.679949 | -3.715000 | -1.637605 | C | -4.179925 | 1.513234  | -1.787606 |
| H                                                                         | -2.511584 | -4.625273 | -0.361560 | O | -3.174270 | 1.980419  | -0.888555 |
| H                                                                         | -1.959298 | -4.195683 | 1.803307  | C | -2.682672 | 3.276429  | -1.221658 |
| H                                                                         | -2.629227 | -2.548586 | 1.818341  | C | -1.787900 | 3.774723  | -0.109923 |
| H                                                                         | 0.341362  | -3.189908 | 2.131226  | O | -0.582109 | 3.010860  | -0.069026 |
| H                                                                         | -0.762691 | -3.071666 | 3.507460  | C | 0.249407  | 3.300569  | 1.063984  |
| H                                                                         | -0.732776 | -1.003725 | 4.498190  | C | -0.067321 | 2.453362  | 2.284311  |
| H                                                                         | -2.111601 | -0.709056 | 3.411702  | O | 0.387472  | 1.126398  | 2.060644  |
| H                                                                         | 0.419915  | 0.973599  | 3.317532  | C | 0.198220  | 0.249274  | 3.165405  |
| H                                                                         | -0.921871 | 1.325453  | 4.432913  | C | -1.150689 | -0.451515 | 3.181547  |
| H                                                                         | -0.065181 | 3.039889  | 1.952343  | O | -1.168291 | -1.471803 | 2.190970  |
| H                                                                         | -1.184214 | 3.388051  | 3.284407  | C | -2.404025 | -2.161230 | 2.128736  |
| H                                                                         | -1.922323 | 4.617946  | 1.358936  | C | -2.294545 | -3.295073 | 1.126660  |
| H                                                                         | -3.107351 | 3.340371  | 1.729351  | O | -2.126246 | -2.839535 | -0.225223 |
| H                                                                         | -2.674832 | 4.519058  | -1.181191 | C | -3.216040 | -3.101268 | -1.118816 |
| H                                                                         | -3.911488 | 3.558701  | -0.333770 | C | -4.354661 | -2.099096 | -1.003963 |
| H                                                                         | -2.105428 | 2.449386  | -2.538413 | O | -3.848130 | -0.819391 | -1.341173 |
| H                                                                         | -3.750057 | 3.079262  | -2.779011 | H | -5.675520 | -0.001646 | -1.886355 |
| H                                                                         | -2.959361 | 0.299891  | -3.290981 | H | -5.137925 | 0.372889  | -0.230713 |
| H                                                                         | -4.658314 | 0.827817  | -3.335354 | H | -4.971733 | 2.269019  | -1.879496 |
| H                                                                         | -4.749338 | -1.492412 | -2.906731 | H | -3.750133 | 1.341159  | -2.783028 |
| H                                                                         | -5.064537 | -0.719059 | -1.333074 | H | -3.519798 | 3.978646  | -1.334146 |
| .                                                                         |           |           |           | H | -2.134181 | 3.246858  | -2.173330 |
| H <sup>+</sup> R[N <sub>ω</sub> ]-cgggtg(+00/-00/+0+/-+0+/-+00/-+/-) 5919 |           |           |           | H | -2.323487 | 3.695591  | 0.843443  |
| C                                                                         | 3.076789  | -1.616347 | 0.137296  | H | -1.550498 | 4.831971  | -0.288660 |
| C                                                                         | 4.590504  | -1.788834 | -0.055461 | H | 0.165319  | 4.362803  | 1.321536  |
| C                                                                         | 5.306395  | -0.776681 | -0.984167 | H | 1.278970  | 3.108965  | 0.754867  |
| H                                                                         | 4.958690  | -0.917869 | -2.012121 | H | -1.145164 | 2.473736  | 2.497711  |
| C                                                                         | 4.948050  | 0.674127  | -0.607503 | H | 0.452574  | 2.887359  | 3.151678  |
| O                                                                         | 3.865093  | 1.166539  | -0.846308 | H | 0.329367  | 0.794685  | 4.109588  |
| O                                                                         | 5.908706  | 1.339067  | 0.015169  | H | 0.985303  | -0.505851 | 3.101719  |
| N                                                                         | 6.763180  | -0.944819 | -0.873954 | H | -1.965327 | 0.265161  | 3.004137  |
| C                                                                         | 2.256977  | -1.747898 | -1.156627 | H | -1.308066 | -0.896131 | 4.175973  |
| N                                                                         | 0.838076  | -1.457666 | -0.975184 | H | -3.213300 | -1.471591 | 1.849306  |
| C                                                                         | 0.281508  | -0.232577 | -1.035951 | H | -2.652709 | -2.593697 | 3.110605  |

H -3.185230 -3.927593 1.201494  
 H -1.423161 -3.908263 1.374308  
 H -3.598885 -4.116114 -0.960803  
 H -2.792630 -3.048171 -2.123696  
 H -4.780238 -2.093221 0.010217  
 H -5.154981 -2.397126 -1.697835

H<sup>+</sup>R[N<sub>ω</sub>]-tgtg(+00/-00/+00/-00/+0+/-0+) 1349

C -3.091041 -1.802560 -1.047778  
 C -4.569548 -1.513536 -0.729710  
 C -4.952215 -0.028146 -0.920441  
 H -4.822797 0.216088 -1.978907  
 C -6.432492 0.159685 -0.577867  
 O -6.835841 0.691379 0.425175  
 O -7.235658 -0.364379 -1.523832  
 N -4.095127 0.874659 -0.137882  
 C -2.180452 -1.716892 0.193652  
 N -0.773474 -1.480525 -0.115750  
 C -0.241952 -0.264260 -0.350482  
 N 1.067304 -0.169567 -0.550844  
 N -1.018544 0.821283 -0.423517  
 H -2.736096 -1.097289 -1.804850  
 H -2.994934 -2.798177 -1.489706  
 H -4.804411 -1.821453 0.296964  
 H -5.216051 -2.105587 -1.379996  
 H -4.279715 1.833227 -0.425906  
 H -4.394486 0.840474 0.836316  
 H -2.236322 -2.645658 0.765582  
 H -2.516097 -0.922087 0.860706  
 H -0.146349 -2.265392 -0.217141  
 H 1.501472 0.712263 -0.806427  
 H -0.556708 1.716462 -0.282932  
 H -2.034966 0.772283 -0.312535  
 H -8.156821 -0.243986 -1.243160  
 H 1.682720 -0.929230 -0.273751  
 C 2.836857 -3.243994 1.229202  
 C 1.851527 -2.779482 2.277980  
 O 1.897814 -1.368084 2.372293  
 C 1.192160 -0.852924 3.493363  
 C 1.272273 0.658085 3.502597  
 O 0.354919 1.196479 2.555554  
 C 0.303061 2.616379 2.535624  
 C 1.268659 3.263618 1.553929  
 O 0.807745 3.051422 0.214915  
 C 1.478791 3.822123 -0.783684  
 C 2.850599 3.294653 -1.171095  
 O 2.710740 1.992412 -1.726468  
 C 3.904005 1.509896 -2.349590  
 C 3.670801 0.123460 -2.908653  
 O 3.655727 -0.818553 -1.845366  
 C 3.298681 -2.130863 -2.249382  
 C 3.440753 -3.061210 -1.064911

O 2.471114 -2.742980 -0.059068  
 H 2.854409 -4.342251 1.214527  
 H 3.839860 -2.883915 1.487613  
 H 2.132779 -3.245075 3.234202  
 H 0.832591 -3.117207 2.034296  
 H 1.638549 -1.237983 4.421642  
 H 0.138503 -1.163474 3.465667  
 H 2.302690 0.965144 3.280867  
 H 1.015266 1.017768 4.509055  
 H 0.499063 3.021766 3.537232  
 H -0.718791 2.891145 2.260518  
 H 2.279051 2.857699 1.681858  
 H 1.304311 4.343154 1.754920  
 H 1.575947 4.863562 -0.450628  
 H 0.826993 3.803017 -1.659668  
 H 3.535851 3.269004 -0.312948  
 H 3.277508 3.981188 -1.915918  
 H 4.727540 1.483656 -1.624781  
 H 4.183294 2.184698 -3.169515  
 H 4.479379 -0.115694 -3.613956  
 H 2.720299 0.102823 -3.459421  
 H 3.963850 -2.486622 -3.049392  
 H 2.269094 -2.146072 -2.635319  
 H 4.448621 -2.954851 -0.647636  
 H 3.308519 -4.100149 -1.393655

H<sup>+</sup>R[N<sub>ω</sub>]-tgtg.tg(--0/-00/+00/-00/+00/--0) 2384

C 3.091042 -1.802563 -1.047767  
 C 4.569550 -1.513538 -0.729702  
 C 4.952216 -0.028149 -0.920440  
 H 4.822798 0.216079 -1.978907  
 C 6.432494 0.159682 -0.577868  
 O 6.835844 0.691380 0.425171  
 O 7.235659 -0.364387 -1.523832  
 N 4.095130 0.874660 -0.137886  
 C 2.180454 -1.716889 0.193663  
 N 0.773476 -1.480524 -0.115739  
 C 0.241953 -0.264261 -0.350476  
 N 1.018544 0.821283 -0.423512  
 N -1.067303 -0.169570 -0.550840  
 H 2.994935 -2.798183 -1.489690  
 H 2.736097 -1.097296 -1.804842  
 H 4.804413 -1.821450 0.296973  
 H 5.216052 -2.105593 -1.379985  
 H 4.279717 1.833227 -0.425915  
 H 4.394490 0.840481 0.836313  
 H 2.236326 -2.645652 0.765599  
 H 2.516099 -0.922080 0.860711  
 H 0.146354 -2.265393 -0.217134  
 H 0.556707 1.716462 -0.282928  
 H -1.682719 -0.929232 -0.273746  
 H -1.501470 0.712259 -0.806428



|   |           |          |           |
|---|-----------|----------|-----------|
| H | -0.085784 | 1.267666 | 4.189432  |
| H | 0.055162  | 3.325314 | 3.068195  |
| H | -1.075151 | 2.330287 | 2.133289  |
| H | 2.628756  | 2.500092 | 1.914861  |
| H | 1.940610  | 4.141669 | 1.979339  |
| H | 3.604774  | 3.981532 | 0.231962  |
| H | 2.013179  | 4.267253 | -0.507570 |
| H | 4.771027  | 2.431360 | -1.174665 |
| H | 3.693427  | 3.238827 | -2.342812 |
| H | 4.489437  | 1.194355 | -3.333580 |
| H | 2.749272  | 1.034435 | -3.004095 |

H<sup>+</sup>R[N $\omega$ ]-tgggtg(-00/+00/-00/+00/--0/-00) 12333

|   |           |           |           |
|---|-----------|-----------|-----------|
| C | 2.989206  | -1.535100 | -0.960294 |
| C | 4.349073  | -1.220505 | -1.613687 |
| C | 4.720270  | 0.278051  | -1.616904 |
| H | 5.720729  | 0.367289  | -2.064968 |
| C | 4.868590  | 0.835413  | -0.205068 |
| O | 4.309411  | 1.821023  | 0.208920  |
| O | 5.733351  | 0.110253  | 0.528573  |
| N | 3.722466  | 1.095489  | -2.328053 |
| C | 1.806164  | -1.551655 | -1.954759 |
| N | 0.514261  | -1.242352 | -1.350275 |
| C | 0.066880  | 0.008166  | -1.145755 |
| N | 0.814269  | 1.066990  | -1.499697 |
| N | -1.144295 | 0.191057  | -0.641436 |
| H | 3.045368  | -2.508253 | -0.465059 |
| H | 2.774964  | -0.811390 | -0.168313 |
| H | 4.367325  | -1.579943 | -2.648925 |
| H | 5.147610  | -1.754005 | -1.096001 |
| H | 3.828586  | 0.966589  | -3.330565 |
| H | 3.895466  | 2.079239  | -2.134380 |
| H | 1.718849  | -2.535605 | -2.420654 |
| H | 1.975198  | -0.843019 | -2.766058 |
| H | 0.021592  | -1.967028 | -0.832135 |
| H | 0.407753  | 1.983966  | -1.407549 |
| H | -1.763178 | -0.598936 | -0.476240 |
| H | -1.448184 | 1.100454  | -0.300353 |
| H | 5.828111  | 0.538802  | 1.393334  |
| H | 1.809964  | 1.004393  | -1.741005 |
| C | -4.230638 | -0.287492 | -1.968910 |
| C | -4.341821 | -1.621483 | -1.262499 |
| O | -3.122184 | -1.912279 | -0.577252 |
| C | -3.068399 | -3.216934 | -0.006434 |
| C | -2.104959 | -3.231621 | 1.159716  |
| O | -0.773123 | -2.976170 | 0.712784  |
| C | 0.225079  | -3.142520 | 1.723513  |
| C | 0.240156  | -2.081369 | 2.813049  |
| O | 0.544847  | -0.813506 | 2.260871  |
| C | 0.612764  | 0.206832  | 3.250897  |
| C | 0.743318  | 1.570169  | 2.607950  |
| O | -0.505180 | 1.951951  | 2.045450  |

|   |           |           |           |
|---|-----------|-----------|-----------|
| C | -0.544546 | 3.294859  | 1.598477  |
| C | -1.942799 | 3.612492  | 1.116865  |
| O | -2.242099 | 2.848751  | -0.052131 |
| C | -3.585712 | 3.035453  | -0.507157 |
| C | -3.916398 | 2.033725  | -1.591655 |
| O | -4.063468 | 0.745914  | -1.012445 |
| H | -5.147356 | -0.129863 | -2.555993 |
| H | -3.379970 | -0.301829 | -2.664946 |
| H | -4.549237 | -2.396720 | -2.012059 |
| H | -5.169502 | -1.600895 | -0.542680 |
| H | -2.770678 | -3.947668 | -0.769343 |
| H | -4.056547 | -3.502600 | 0.376397  |
| H | -2.150029 | -4.220421 | 1.636959  |
| H | -2.415326 | -2.476991 | 1.890834  |
| H | 1.180840  | -3.132358 | 1.196741  |
| H | 0.108191  | -4.127115 | 2.196141  |
| H | 1.003862  | -2.379455 | 3.548968  |
| H | -0.720432 | -2.042280 | 3.345957  |
| H | 1.481679  | 0.036249  | 3.903719  |
| H | -0.290672 | 0.190801  | 3.875276  |
| H | 1.529334  | 1.559500  | 1.840516  |
| H | 1.039240  | 2.289318  | 3.385737  |
| H | 0.186626  | 3.462037  | 0.792846  |
| H | -0.294665 | 3.984972  | 2.417931  |
| H | -2.012555 | 4.685258  | 0.890872  |
| H | -2.664960 | 3.375205  | 1.907651  |
| H | -3.701506 | 4.052588  | -0.904511 |
| H | -4.281827 | 2.908005  | 0.330610  |
| H | -3.121337 | 2.025271  | -2.350865 |
| H | -4.850063 | 2.341760  | -2.083900 |

H<sup>+</sup>R[N $\omega$ ]-cgggtg(+00/+00/--0/-00/+00/+0+) 2865

|   |           |           |           |
|---|-----------|-----------|-----------|
| C | 3.193847  | -1.281654 | 0.181387  |
| C | 4.699793  | -1.415748 | -0.087942 |
| C | 5.344913  | -0.359949 | -1.020207 |
| H | 4.944213  | -0.475573 | -2.031911 |
| C | 4.980029  | 1.069935  | -0.575417 |
| O | 3.872295  | 1.543770  | -0.726772 |
| O | 5.962836  | 1.738036  | 0.005103  |
| N | 6.808488  | -0.499802 | -0.996202 |
| C | 2.314501  | -1.411155 | -1.073236 |
| N | 0.904821  | -1.124101 | -0.829935 |
| C | 0.324328  | 0.076136  | -0.987625 |
| N | -0.995779 | 0.182428  | -0.915081 |
| N | 1.053915  | 1.167645  | -1.274544 |
| H | 2.906948  | -2.061881 | 0.893288  |
| H | 2.987404  | -0.327584 | 0.669899  |
| H | 4.912244  | -2.398193 | -0.525451 |
| H | 5.226223  | -1.382344 | 0.872337  |
| H | 7.111266  | -1.397348 | -0.635834 |
| H | 7.229615  | -0.368198 | -1.909241 |
| H | 2.660051  | -0.745206 | -1.865068 |



|                                                                       |           |           |           |   |           |           |           |
|-----------------------------------------------------------------------|-----------|-----------|-----------|---|-----------|-----------|-----------|
| H                                                                     | 2.378307  | -2.428319 | -1.470548 | C | -4.554004 | -1.369413 | -1.228875 |
| H                                                                     | 0.330498  | -1.825943 | -0.362739 | C | -4.875782 | -0.107035 | -0.389885 |
| H                                                                     | -1.592630 | -0.628732 | -0.792143 | H | -4.653594 | -0.313262 | 0.661862  |
| H                                                                     | 2.057047  | 1.222442  | -1.110502 | C | -6.376090 | 0.185231  | -0.464685 |
| H                                                                     | 0.559318  | 2.030893  | -1.441032 | O | -6.860907 | 1.146406  | -1.003168 |
| H                                                                     | 6.751688  | 1.145940  | -0.055029 | O | -7.098032 | -0.776592 | 0.146174  |
| H                                                                     | -1.420810 | 1.092239  | -0.756030 | N | -4.060494 | 1.040433  | -0.803157 |
| C                                                                     | -1.634484 | -2.999554 | 1.617007  | C | -2.219811 | -1.687559 | -0.176517 |
| C                                                                     | -0.730304 | -2.293525 | 2.605414  | N | -0.793834 | -1.451451 | -0.389541 |
| O                                                                     | -0.546264 | -0.946312 | 2.201901  | C | -0.228133 | -0.230082 | -0.478379 |
| C                                                                     | -0.256546 | -0.055654 | 3.270915  | N | 1.094899  | -0.147036 | -0.553236 |
| C                                                                     | 0.140566  | 1.298250  | 2.723838  | N | -0.977258 | 0.874891  | -0.525584 |
| O                                                                     | -0.947107 | 1.885620  | 2.029405  | H | -2.660403 | -0.786382 | -2.082490 |
| C                                                                     | -0.669103 | 3.196314  | 1.565692  | H | -2.924151 | -2.513700 | -2.048799 |
| C                                                                     | -1.818695 | 3.679123  | 0.710842  | H | -5.009165 | -2.230755 | -0.733523 |
| O                                                                     | -1.820658 | 2.992484  | -0.547132 | H | -5.043030 | -1.284583 | -2.205467 |
| C                                                                     | -2.978818 | 3.253486  | -1.350790 | H | -4.288334 | 1.284424  | -1.765852 |
| C                                                                     | -4.160840 | 2.368254  | -0.993045 | H | -4.336910 | 1.856343  | -0.261523 |
| O                                                                     | -3.846808 | 1.027846  | -1.345273 | H | -2.566061 | -0.963957 | 0.563896  |
| C                                                                     | -4.792718 | 0.084579  | -0.867490 | H | -2.322560 | -2.673270 | 0.282085  |
| C                                                                     | -4.504278 | -1.289186 | -1.434284 | H | -0.171787 | -2.238033 | -0.505598 |
| O                                                                     | -3.253387 | -1.796232 | -0.956582 | H | 1.558766  | 0.739276  | -0.728041 |
| C                                                                     | -3.204096 | -3.216060 | -0.896100 | H | -0.513713 | 1.749657  | -0.292658 |
| C                                                                     | -1.765066 | -3.680496 | -0.697407 | H | -1.998813 | 0.857210  | -0.587903 |
| O                                                                     | -1.040040 | -2.984805 | 0.316448  | H | -8.038080 | -0.553095 | 0.057356  |
| H                                                                     | -2.600698 | -2.486445 | 1.587373  | H | 1.675809  | -0.932780 | -0.274085 |
| H                                                                     | -1.787400 | -4.036644 | 1.945985  | C | 1.658990  | -2.916875 | 2.150665  |
| H                                                                     | 0.240402  | -2.804383 | 2.680564  | C | 2.708529  | -3.344126 | 1.149302  |
| H                                                                     | -1.215452 | -2.346749 | 3.589762  | O | 2.447981  | -2.759546 | -0.129094 |
| H                                                                     | 0.579270  | -0.435013 | 3.877222  | C | 3.490975  | -3.025353 | -1.074639 |
| H                                                                     | -1.134340 | 0.045218  | 3.923530  | C | 3.435735  | -2.033313 | -2.215219 |
| H                                                                     | 1.004179  | 1.192428  | 2.052101  | O | 3.764519  | -0.745719 | -1.718574 |
| H                                                                     | 0.446370  | 1.933682  | 3.568686  | C | 3.847336  | 0.251297  | -2.726848 |
| H                                                                     | -0.548441 | 3.887438  | 2.413127  | C | 4.055234  | 1.603602  | -2.081301 |
| H                                                                     | 0.264811  | 3.214257  | 0.986042  | O | 2.831400  | 2.060818  | -1.499914 |
| H                                                                     | -2.759271 | 3.507655  | 1.245764  | C | 2.948447  | 3.327317  | -0.862416 |
| H                                                                     | -1.710689 | 4.756761  | 0.532267  | C | 1.560453  | 3.850850  | -0.531745 |
| H                                                                     | -3.265248 | 4.308510  | -1.266975 | O | 0.820059  | 3.034048  | 0.377151  |
| H                                                                     | -2.682850 | 3.061000  | -2.383983 | C | 1.194193  | 3.167313  | 1.752624  |
| H                                                                     | -4.389893 | 2.436430  | 0.079431  | C | 0.163477  | 2.475202  | 2.632239  |
| H                                                                     | -5.046777 | 2.712130  | -1.546900 | O | 0.205175  | 1.056145  | 2.576648  |
| H                                                                     | -4.772077 | 0.051137  | 0.231027  | C | 1.073492  | 0.459088  | 3.534650  |
| H                                                                     | -5.808329 | 0.368574  | -1.181058 | C | 0.978747  | -1.048482 | 3.445403  |
| H                                                                     | -5.318285 | -1.954373 | -1.119442 | O | 1.728420  | -1.514643 | 2.331360  |
| H                                                                     | -4.489206 | -1.255385 | -2.530140 | H | 1.860166  | -3.444061 | 3.094914  |
| H                                                                     | -3.566351 | -3.664524 | -1.831326 | H | 0.653605  | -3.212698 | 1.814382  |
| H                                                                     | -3.857164 | -3.571902 | -0.088002 | H | 2.705483  | -4.439777 | 1.069864  |
| H                                                                     | -1.193705 | -3.518150 | -1.613613 | H | 3.696811  | -3.023965 | 1.500572  |
| H                                                                     | -1.775464 | -4.758871 | -0.487203 | H | 3.386143  | -4.045112 | -1.467308 |
|                                                                       |           |           |           | H | 4.464358  | -2.942992 | -0.577695 |
|                                                                       |           |           |           | H | 2.436687  | -2.023855 | -2.674605 |
|                                                                       |           |           |           | H | 4.156344  | -2.349727 | -2.983150 |
| H <sup>+</sup> R[N <sub>ω</sub> ]-tgtgtg(+00/-00/+00/-00/+0/+0+) 6963 |           |           |           |   |           |           |           |
| C                                                                     | -3.054101 | -1.597101 | -1.465557 |   |           |           |           |

|   |           |           |           |
|---|-----------|-----------|-----------|
| H | 2.930686  | 0.267899  | -3.332472 |
| H | 4.694693  | 0.043379  | -3.395648 |
| H | 4.382766  | 2.319568  | -2.846644 |
| H | 4.837095  | 1.532069  | -1.314584 |
| H | 3.428598  | 4.049490  | -1.537838 |
| H | 3.577797  | 3.242730  | 0.033881  |
| H | 0.964996  | 3.890634  | -1.446280 |
| H | 1.646995  | 4.870320  | -0.134106 |
| H | 1.222579  | 4.233565  | 2.016002  |
| H | 2.192049  | 2.746068  | 1.922374  |
| H | -0.836771 | 2.773565  | 2.307192  |
| H | 0.296247  | 2.822694  | 3.665636  |
| H | 0.775865  | 0.771200  | 4.545839  |
| H | 2.116065  | 0.763301  | 3.374454  |
| H | -0.075729 | -1.344777 | 3.357653  |
| H | 1.380269  | -1.485181 | 4.371357  |

H<sup>+</sup>R[N<sub>ω</sub>]-cg.g.g.tg.(-00/+0+/-00/--0/--0/-00) 5800

|   |           |           |           |
|---|-----------|-----------|-----------|
| C | -2.975677 | -1.669888 | -0.233210 |
| C | -4.486173 | -1.772331 | -0.491969 |
| C | -5.151167 | -0.610854 | -1.271808 |
| H | -4.768765 | -0.594251 | -2.297091 |
| C | -4.781215 | 0.750609  | -0.653747 |
| O | -3.685299 | 1.254960  | -0.783957 |
| O | -5.745547 | 1.319915  | 0.053072  |
| N | -6.613175 | -0.761857 | -1.234955 |
| C | -2.117740 | -1.636403 | -1.508208 |
| N | -0.698717 | -1.406497 | -1.247549 |
| C | -0.124957 | -0.198058 | -1.074455 |
| N | 1.173763  | -0.131420 | -0.811742 |
| N | -0.829322 | 0.928869  | -1.241424 |
| H | -2.751275 | -0.789183 | 0.371403  |
| H | -2.678938 | -2.538762 | 0.363267  |
| H | -4.994690 | -1.861508 | 0.474305  |
| H | -4.705870 | -2.692957 | -1.045279 |
| H | -6.904238 | -1.707798 | -1.016416 |
| H | -7.055815 | -0.490557 | -2.106246 |
| H | -2.462012 | -0.863947 | -2.197862 |
| H | -2.195376 | -2.584339 | -2.046768 |
| H | -0.121059 | -2.203365 | -1.028257 |
| H | 1.623163  | 0.767470  | -0.653155 |
| H | -1.845569 | 0.913426  | -1.208878 |
| H | -0.408708 | 1.766732  | -0.847154 |
| H | -6.532986 | 0.734679  | -0.059819 |
| H | 1.726482  | -0.966111 | -0.631404 |
| C | 4.311821  | -2.274138 | -0.823630 |
| C | 4.415247  | -1.189615 | -1.871615 |
| O | 4.161738  | 0.069230  | -1.265780 |
| C | 4.050324  | 1.132172  | -2.199243 |
| C | 3.865173  | 2.438160  | -1.458589 |
| O | 2.665885  | 2.394352  | -0.685114 |
| C | 2.312893  | 3.647914  | -0.103402 |

|   |           |           |           |
|---|-----------|-----------|-----------|
| C | 1.442922  | 3.425581  | 1.113388  |
| O | 0.218643  | 2.807438  | 0.730297  |
| C | -0.735706 | 2.670771  | 1.788474  |
| C | -0.452044 | 1.540864  | 2.766212  |
| O | -0.663097 | 0.286856  | 2.130057  |
| C | -0.501262 | -0.836028 | 2.990806  |
| C | 0.917138  | -1.380121 | 3.065679  |
| O | 1.229032  | -2.084246 | 1.869698  |
| C | 2.501422  | -2.714414 | 1.912548  |
| C | 2.740812  | -3.418088 | 0.590104  |
| O | 2.935737  | -2.503964 | -0.494850 |
| H | 4.874278  | -1.971638 | 0.067664  |
| H | 4.748766  | -3.200778 | -1.216677 |
| H | 5.425183  | -1.207955 | -2.305530 |
| H | 3.694976  | -1.383939 | -2.678616 |
| H | 3.201095  | 0.955138  | -2.874070 |
| H | 4.960633  | 1.209902  | -2.811374 |
| H | 3.813408  | 3.250796  | -2.195432 |
| H | 4.719832  | 2.622671  | -0.795537 |
| H | 1.793867  | 4.269735  | -0.843869 |
| H | 3.215846  | 4.180274  | 0.222003  |
| H | 1.983730  | 2.801075  | 1.834512  |
| H | 1.239293  | 4.398860  | 1.581354  |
| H | -0.799901 | 3.614224  | 2.346088  |
| H | -1.698275 | 2.496047  | 1.304309  |
| H | 0.568498  | 1.613605  | 3.165865  |
| H | -1.144146 | 1.651591  | 3.614494  |
| H | -0.838616 | -0.585773 | 4.005473  |
| H | -1.155926 | -1.621151 | 2.604895  |
| H | 0.982344  | -2.062849 | 3.926303  |
| H | 1.641759  | -0.569628 | 3.228016  |
| H | 2.531943  | -3.456699 | 2.724447  |
| H | 3.291043  | -1.973374 | 2.102516  |
| H | 1.867852  | -4.028186 | 0.342523  |
| H | 3.602737  | -4.088272 | 0.678287  |

H<sup>+</sup>R[N<sub>α</sub>]-g.g.g.gt(-00/+00/-00/+00/-00/+00) 116BB

|   |           |           |           |
|---|-----------|-----------|-----------|
| C | -1.936429 | -2.194618 | -1.863702 |
| C | -1.001065 | -1.657490 | -0.747427 |
| C | -0.339998 | -0.292806 | -1.048139 |
| H | 0.234256  | -0.355423 | -1.970988 |
| C | -1.419350 | 0.797789  | -1.200919 |
| O | -1.817682 | 1.353982  | -0.144504 |
| O | -1.898227 | 0.910756  | -2.351092 |
| N | 0.634192  | 0.057113  | 0.036992  |
| C | -3.450498 | -2.108063 | -1.594228 |
| N | -3.898717 | -0.716075 | -1.466643 |
| C | -4.724385 | -0.237420 | -0.541768 |
| N | -4.577161 | 1.025494  | -0.138131 |
| N | -5.683165 | -1.026838 | -0.007104 |
| H | -1.723311 | -3.255108 | -2.024475 |
| H | -1.719657 | -1.690908 | -2.809090 |

|   |           |           |           |                                                                       |           |           |           |
|---|-----------|-----------|-----------|-----------------------------------------------------------------------|-----------|-----------|-----------|
| H | -0.196529 | -2.379520 | -0.590453 | H                                                                     | -0.454629 | 3.513108  | 0.071728  |
| H | -1.546008 | -1.576349 | 0.200082  | H                                                                     | 0.377223  | 4.730116  | 1.077619  |
| H | 1.353276  | -0.673630 | 0.131435  |                                                                       |           |           |           |
| H | 0.181599  | 0.190546  | 0.953643  | H <sup>+</sup> R[N <sub>a</sub> ]-gggg.t(-00/+00/-00/+00/-00/+00) 160 |           |           |           |
| H | -3.700915 | -2.640233 | -0.671941 | C                                                                     | -1.828346 | -2.002593 | -0.451616 |
| H | -3.979587 | -2.599666 | -2.417214 | C                                                                     | -1.065816 | -1.117163 | -1.474359 |
| H | -3.328602 | -0.012674 | -1.967835 | C                                                                     | -0.504613 | 0.236929  | -0.982873 |
| H | -5.303554 | 1.491091  | 0.381570  | H                                                                     | -0.091830 | 0.766207  | -1.838987 |
| H | -6.226589 | -0.709268 | 0.778835  | C                                                                     | -1.626236 | 1.085554  | -0.353507 |
| H | -6.031089 | -1.820293 | -0.520901 | O                                                                     | -2.273648 | 1.806758  | -1.143014 |
| H | 1.111200  | 0.944878  | -0.200435 | O                                                                     | -1.874269 | 0.855112  | 0.859683  |
| H | -3.626738 | 1.439674  | -0.194855 | N                                                                     | 0.632933  | 0.060752  | -0.017913 |
| C | -0.350214 | 2.630826  | 2.543286  | C                                                                     | -3.366499 | -1.991242 | -0.539697 |
| C | 0.016219  | 1.585226  | 3.569414  | N                                                                     | -3.929146 | -0.675614 | -0.211669 |
| O | 0.023672  | 0.285824  | 2.970951  | C                                                                     | -4.914891 | -0.062859 | -0.866167 |
| C | 0.486371  | -0.715162 | 3.870761  | N                                                                     | -4.930659 | 1.268615  | -0.903299 |
| C | 0.528875  | -2.061126 | 3.185065  | N                                                                     | -5.869832 | -0.788533 | -1.488089 |
| O | 1.521988  | -2.038363 | 2.168755  | H                                                                     | -1.534574 | -1.759704 | 0.572764  |
| C | 1.799729  | -3.311246 | 1.606054  | H                                                                     | -1.539202 | -3.045559 | -0.611768 |
| C | 2.939090  | -3.167625 | 0.623732  | H                                                                     | -1.715191 | -0.885021 | -2.323852 |
| O | 2.544206  | -2.318571 | -0.453443 | H                                                                     | -0.228378 | -1.685886 | -1.887554 |
| C | 3.597741  | -2.129282 | -1.399678 | H                                                                     | 0.363960  | -0.410513 | 0.857306  |
| C | 3.179460  | -1.131431 | -2.455259 | H                                                                     | 1.001160  | 0.992296  | 0.245192  |
| O | 3.013111  | 0.137366  | -1.842966 | H                                                                     | -3.758673 | -2.749090 | 0.147178  |
| C | 2.783741  | 1.203739  | -2.756681 | H                                                                     | -3.683745 | -2.262915 | -1.550708 |
| C | 2.795306  | 2.507327  | -1.991972 | H                                                                     | -3.348066 | -0.076126 | 0.392770  |
| O | 1.706292  | 2.540439  | -1.071985 | H                                                                     | -4.004881 | 1.747573  | -0.868815 |
| C | 1.646221  | 3.766711  | -0.337210 | H                                                                     | -6.062269 | -1.734222 | -1.200616 |
| C | 0.472089  | 3.737974  | 0.612346  | H                                                                     | -6.535387 | -0.343350 | -2.098584 |
| O | 0.712492  | 2.748397  | 1.605778  | H                                                                     | 1.399633  | -0.471378 | -0.452610 |
| H | -0.504815 | 3.587125  | 3.064508  | H                                                                     | -5.743793 | 1.762757  | -1.234906 |
| H | -1.275837 | 2.354176  | 2.025837  | C                                                                     | 1.415507  | -3.426131 | 1.351264  |
| H | -0.716235 | 1.608960  | 4.388103  | C                                                                     | 1.384622  | -2.687877 | 2.669513  |
| H | 1.007987  | 1.804328  | 3.984832  | O                                                                     | 0.599697  | -1.503550 | 2.565436  |
| H | -0.186771 | -0.781052 | 4.737546  | C                                                                     | 0.565426  | -0.778933 | 3.801222  |
| H | 1.489748  | -0.457837 | 4.234078  | C                                                                     | -0.076095 | 0.573298  | 3.602617  |
| H | -0.453653 | -2.306295 | 2.756487  | O                                                                     | 0.789326  | 1.377163  | 2.809787  |
| H | 0.771184  | -2.824951 | 3.937262  | C                                                                     | 0.293927  | 2.695927  | 2.607758  |
| H | 0.908449  | -3.716200 | 1.105457  | C                                                                     | 1.264357  | 3.449787  | 1.729966  |
| H | 2.099109  | -4.022251 | 2.388987  | O                                                                     | 1.276507  | 2.880556  | 0.416735  |
| H | 3.211740  | -4.160726 | 0.241141  | C                                                                     | 2.159589  | 3.565619  | -0.468008 |
| H | 3.813034  | -2.740135 | 1.131426  | C                                                                     | 2.095085  | 2.940909  | -1.842835 |
| H | 3.840486  | -3.085577 | -1.882658 | O                                                                     | 2.578253  | 1.605171  | -1.758157 |
| H | 4.495158  | -1.762292 | -0.885893 | C                                                                     | 2.715435  | 0.952501  | -3.010251 |
| H | 2.248726  | -1.454149 | -2.944120 | C                                                                     | 3.410837  | -0.371634 | -2.793632 |
| H | 3.964812  | -1.089074 | -3.223138 | O                                                                     | 2.586194  | -1.242909 | -2.017688 |
| H | 1.822862  | 1.072368  | -3.273229 | C                                                                     | 3.253529  | -2.461583 | -1.694259 |
| H | 3.578286  | 1.235495  | -3.515089 | C                                                                     | 2.358834  | -3.323271 | -0.833571 |
| H | 2.706073  | 3.337982  | -2.704856 | O                                                                     | 2.111882  | -2.645138 | 0.388909  |
| H | 3.744300  | 2.613608  | -1.450672 | H                                                                     | 0.394771  | -3.641385 | 1.006191  |
| H | 1.524550  | 4.606180  | -1.034161 | H                                                                     | 1.930033  | -4.384999 | 1.505652  |
| H | 2.580190  | 3.907555  | 0.221626  | H                                                                     | 2.408663  | -2.430708 | 2.969411  |

|                                                                       |           |           |           |   |           |           |           |
|-----------------------------------------------------------------------|-----------|-----------|-----------|---|-----------|-----------|-----------|
| H                                                                     | 0.959755  | -3.353546 | 3.434260  | O | -2.244448 | -2.449316 | -0.881483 |
| H                                                                     | 1.588194  | -0.648971 | 4.176340  | H | -3.160577 | -4.214350 | -0.274343 |
| H                                                                     | -0.008081 | -1.349275 | 4.544327  | H | -4.022502 | -2.714516 | 0.150363  |
| H                                                                     | -0.221951 | 1.032221  | 4.591608  | O | -2.267800 | -1.836610 | 1.875671  |
| H                                                                     | -1.050995 | 0.476414  | 3.111926  | H | -1.345249 | -3.620069 | 1.334866  |
| H                                                                     | 0.213898  | 3.223891  | 3.569391  | H | -2.937891 | -3.789796 | 2.103050  |
| H                                                                     | -0.697733 | 2.658873  | 2.142961  | C | -2.862928 | -2.402426 | -2.168014 |
| H                                                                     | 2.273852  | 3.408847  | 2.158715  | C | -1.731338 | -1.712367 | 3.187171  |
| H                                                                     | 0.951932  | 4.500557  | 1.669931  | C | -2.083362 | -1.494954 | -3.091764 |
| H                                                                     | 3.186567  | 3.516183  | -0.083373 | H | -2.902071 | -3.411768 | -2.600113 |
| H                                                                     | 1.866692  | 4.621439  | -0.543395 | H | -3.889318 | -2.026564 | -2.071666 |
| H                                                                     | 2.720729  | 3.531399  | -2.526557 | C | -1.944546 | -0.300943 | 3.683265  |
| H                                                                     | 1.063885  | 2.956520  | -2.221728 | H | -0.661388 | -1.964917 | 3.190154  |
| H                                                                     | 3.326846  | 1.556867  | -3.695227 | H | -2.244710 | -2.400174 | 3.873472  |
| H                                                                     | 1.733809  | 0.800289  | -3.482159 | O | -2.170757 | -0.166080 | -2.605105 |
| H                                                                     | 4.361903  | -0.202840 | -2.273161 | H | -1.034333 | -1.819233 | -3.157704 |
| H                                                                     | 3.624176  | -0.831157 | -3.768342 | H | -2.520043 | -1.567114 | -4.098037 |
| H                                                                     | 4.183647  | -2.242706 | -1.154539 | O | -1.180492 | 0.619950  | 2.913964  |
| H                                                                     | 3.505611  | -3.009478 | -2.612579 | H | -1.642465 | -0.250130 | 4.739214  |
| H                                                                     | 2.867902  | -4.279501 | -0.648279 | H | -3.010918 | -0.048062 | 3.618711  |
| H                                                                     | 1.414607  | -3.539269 | -1.354306 | C | -1.632299 | 0.817432  | -3.481183 |
|                                                                       |           |           |           | C | -1.385286 | 1.971595  | 3.339195  |
|                                                                       |           |           |           | C | -1.953422 | 2.186096  | -2.925898 |
| H <sup>+</sup> R[N <sub>a</sub> ]-ggg.g.t(-00/+00/-00/+00/-00/+00) GS |           |           |           | H | -0.545310 | 0.692251  | -3.583132 |
| N                                                                     | -0.644214 | 0.070206  | 0.013898  | H | -2.083071 | 0.728281  | -4.479440 |
| H                                                                     | -1.344862 | -0.678292 | -0.071778 | C | -0.689119 | 2.927155  | 2.400402  |
| C                                                                     | 0.676889  | -0.364677 | -0.554481 | H | -0.983668 | 2.102200  | 4.353299  |
| H                                                                     | -0.993868 | 0.896994  | -0.502316 | H | -2.460686 | 2.189212  | 3.359853  |
| H                                                                     | 0.494105  | -0.604131 | -1.601639 | O | -1.284925 | 2.372056  | -1.681663 |
| C                                                                     | 1.161752  | -1.625133 | 0.198521  | H | -1.623205 | 2.948297  | -3.644605 |
| C                                                                     | 1.673523  | 0.822634  | -0.460055 | H | -3.037762 | 2.285727  | -2.786798 |
| H                                                                     | 1.506994  | -1.330872 | 1.195921  | O | -1.354905 | 2.898406  | 1.142543  |
| H                                                                     | 0.281856  | -2.255240 | 0.345405  | H | 0.362919  | 2.649857  | 2.273663  |
| C                                                                     | 2.225911  | -2.505100 | -0.506632 | H | -0.742250 | 3.936251  | 2.835182  |
| O                                                                     | 2.519051  | 0.889253  | -1.407361 | C | -1.538116 | 3.659898  | -1.109570 |
| O                                                                     | 1.592145  | 1.542991  | 0.540235  | C | -0.792858 | 3.799352  | 0.196350  |
| H                                                                     | 2.006640  | -3.549732 | -0.269633 | H | -1.197847 | 4.440378  | -1.802719 |
| H                                                                     | 2.127233  | -2.423374 | -1.594383 | H | -2.616159 | 3.783071  | -0.945039 |
| C                                                                     | 3.699010  | -2.292879 | -0.123082 | H | 0.272404  | 3.583996  | 0.056684  |
| H                                                                     | -0.577271 | 0.342741  | 1.006726  | H | -0.900875 | 4.836460  | 0.547227  |
| H                                                                     | 3.810867  | -2.325457 | 0.966344  |   |           |           |           |
| H                                                                     | 4.288770  | -3.113908 | -0.545273 |   |           |           |           |
| N                                                                     | 4.190096  | -1.009805 | -0.629629 |   |           |           |           |
| H                                                                     | 3.532144  | -0.467409 | -1.217525 |   |           |           |           |
| C                                                                     | 5.109279  | -0.237078 | -0.057043 |   |           |           |           |
| N                                                                     | 5.092561  | 1.068536  | -0.331119 |   |           |           |           |
| N                                                                     | 6.024896  | -0.758944 | 0.786043  |   |           |           |           |
| H                                                                     | 4.229277  | 1.442497  | -0.752740 |   |           |           |           |
| H                                                                     | 5.823704  | 1.685613  | -0.019374 |   |           |           |           |
| H                                                                     | 6.213308  | -1.747833 | 0.781828  |   |           |           |           |
| H                                                                     | 6.695279  | -0.165554 | 1.246764  |   |           |           |           |
| C                                                                     | -3.030902 | -3.176344 | 0.061640  |   |           |           |           |
| C                                                                     | -2.347777 | -3.174003 | 1.409642  |   |           |           |           |
